# Supplementary material for: Characterization of site-specific N-glycosylation signatures of isolated uromodulin from human urine
Source: Royal Society of Chemistry journal article supplement (doi:10.1039/d3an01018j), 2023-01-01
Supplement: d3an01018j1.xlsx [file d3an01018j1.xlsx]

## Sheet: Table S1
Supplementary Table S1. Gray value analysis of SDS-PAGE gel (Fig. 1E).
Band	Gray value
4 mg	34405.6
8 mg	33625.8
12 mg	34065.6
16 mg	35043.8
20 mg	33353.6
24 mg	63804.2
50 mg	32152.5
