# Supplementary material for: Characterization of site-specific N-glycosylation signatures of isolated uromodulin from human urine
Source: Royal Society of Chemistry journal article supplement (doi:10.1039/d3an01018j), 2023-01-01
Supplement: d3an01018j3.xlsx [file d3an01018j3.xlsx]

## Sheet: Table S3.1
Supplementary Table S3.1. Site-specific N-glycosylation anlaysis of Umod (N38)
Peptide < ProteinMetrics Confidential >	Glycans NHFAGNa	Modification Type(s)	Observed m/z	z	Observed (M+H)	Calc. mass (M+H)	Off-by-x error	Mass error (ppm)	Starting position	Cleavage	Score	Delta	Delta Mod	|Log Prob|	# of unique peptides	Protein Name	Protein DB number	Comment	Scan #	Scan Time
E.ARWC[+57.021]SEC[+57.021]HSN[+3372.190]ATC[+57.021]TE.D	HexNAc(6)Hex(7)Fuc(1)NeuAc(3)	C[+57]*3, N[+3372]	1310.73	4	5239.9	5240.9	-1	0.5	29	Specific	277.8	277.8	277.8	2.73	244	>sp|P07911|UROM_HUMAN Uromodulin OS=Homo sapiens OX=9606 GN=UMOD PE=1 SV=1	1	20230315_zy_umod_g-after.4258.4258.4	controllerType=0 controllerNumber=1 scan=4258	15.7402
E.ARWC[+57.021]SEC[+57.021]HSN[+3663.286]ATC[+57.021]TE.D	HexNAc(6)Hex(7)Fuc(1)NeuAc(4)	C[+57]*3, N[+3663]	1383.76	4	5532.01	5532	0	2.3	29	Specific	274.96	274.96	274.96	3.17	244	>sp|P07911|UROM_HUMAN Uromodulin OS=Homo sapiens OX=9606 GN=UMOD PE=1 SV=1	1	20230315_zy_umod_g-after.4575.4575.4	controllerType=0 controllerNumber=1 scan=4575	16.923
E.ARWC[+57.021]SEC[+57.021]HSN[+3663.286]ATC[+57.021]TEDE.A	HexNAc(6)Hex(7)Fuc(1)NeuAc(4)	C[+57]*3, N[+3663]	1444.77	4	5776.07	5776.07	0	1.4	29	Specific	293.56	293.56	293.56	3.77	244	>sp|P07911|UROM_HUMAN Uromodulin OS=Homo sapiens OX=9606 GN=UMOD PE=1 SV=1	1	20230315_zy_umod_g-after.4801.4801.4	controllerType=0 controllerNumber=1 scan=4801	17.7833
R.WC[+57.021]SEC[+57.021]HSN[+3704.312]ATC[+57.021]TEDE.A	HexNAc(7)Hex(6)Fuc(1)NeuAc(4)	C[+57]*3, N[+3704]	1398.49	4	5590.93	5589.95	1	-4.6	31	Specific	204.47	204.47	204.47	3.26	666	>sp|P07911|UROM_HUMAN Uromodulin OS=Homo sapiens OX=9606 GN=UMOD PE=1 SV=1	1	20230315_zy_umod_tg-after.4959.4959.4	controllerType=0 controllerNumber=1 scan=4959	18.3862
R.WC[+57.021]SEC[+57.021]HSN[+3009.074]ATC[+57.021]TE.D	HexNAc(7)Hex(8)NeuAc(1)	C[+57]*3, N[+3009]	1550.55	3	4649.65	4650.65	-1	1.2	31	Specific	209.23	209.23	9.83	5.01	666	>sp|P07911|UROM_HUMAN Uromodulin OS=Homo sapiens OX=9606 GN=UMOD PE=1 SV=1	1	20230315_zy_umod_tg-after.4499.4499.3	controllerType=0 controllerNumber=1 scan=4499	16.7046
R.WC[+57.021]SEC[+57.021]HSN[+3081.095]ATC[+57.021]TE.D	HexNAc(6)Hex(7)Fuc(1)NeuAc(2)	C[+57]*3, N[+3081]	1574.9	3	4722.67	4722.67	0	1.1	31	Specific	209.84	209.84	209.84	4.68	666	>sp|P07911|UROM_HUMAN Uromodulin OS=Homo sapiens OX=9606 GN=UMOD PE=1 SV=1	1	20230315_zy_umod_tg-after.4065.4065.3	controllerType=0 controllerNumber=1 scan=4065	15.1012
R.WC[+57.021]SEC[+57.021]HSN[+3007.058]ATC[+57.021]TE.D	HexNAc(5)Hex(6)Fuc(1)NeuAc(3)	C[+57]*3, N[+3007]	1550.22	3	4648.64	4648.63	0	1.6	31	Specific	211.21	211.21	211.21	4.51	666	>sp|P07911|UROM_HUMAN Uromodulin OS=Homo sapiens OX=9606 GN=UMOD PE=1 SV=1	1	20230315_zy_umod_tg-after.4490.4490.3	controllerType=0 controllerNumber=1 scan=4490	16.67
R.WC[+57.021]SEC[+57.021]HSN[+3663.286]ATC[+57.021]TE.D	HexNAc(6)Hex(7)Fuc(1)NeuAc(4)	C[+57]*3, N[+3663]	1768.96	3	5304.88	5304.86	0	3.5	31	Specific	230.73	230.73	230.73	4.03	666	>sp|P07911|UROM_HUMAN Uromodulin OS=Homo sapiens OX=9606 GN=UMOD PE=1 SV=1	1	20230315_zy_umod_tg-after.4735.4735.3	controllerType=0 controllerNumber=1 scan=4735	17.5731
R.WC[+57.021]SEC[+57.021]HSN[+3081.095]ATC[+57.021]TEDE.A	HexNAc(6)Hex(7)Fuc(1)NeuAc(2)	C[+57]*3, N[+3081]	1242.44	4	4966.73	4966.74	0	-1.1	31	Specific	245.88	245.88	245.88	3.85	666	>sp|P07911|UROM_HUMAN Uromodulin OS=Homo sapiens OX=9606 GN=UMOD PE=1 SV=1	1	20230315_zy_umod_tg-after.4174.4174.4	controllerType=0 controllerNumber=1 scan=4174	15.5079
R.WC[+57.021]SEC[+57.021]HSN[+3226.132]ATC[+57.021]TEDE.A	HexNAc(6)Hex(7)NeuAc(3)	C[+57]*3, N[+3226]	1278.7	4	5111.79	5111.77	0	2.8	31	Specific	250.4	250.4	250.4	3.62	666	>sp|P07911|UROM_HUMAN Uromodulin OS=Homo sapiens OX=9606 GN=UMOD PE=1 SV=1	1	20230315_zy_umod_tg-after.4559.4559.4	controllerType=0 controllerNumber=1 scan=4559	16.9183
R.WC[+57.021]SEC[+57.021]HSN[+3575.270]ATC[+57.021]TEDE.A	HexNAc(7)Hex(7)Fuc(1)NeuAc(3)	C[+57]*3, N[+3575]	1365.73	4	5459.91	5460.91	-1	0.4	31	Specific	261.78	261.78	261.78	4.44	666	>sp|P07911|UROM_HUMAN Uromodulin OS=Homo sapiens OX=9606 GN=UMOD PE=1 SV=1	1	20230315_zy_umod_tg-after.4617.4617.4	controllerType=0 controllerNumber=1 scan=4617	17.1354
R.WC[+57.021]SEC[+57.021]HSN[+4028.418]ATC[+57.021]TEDE.A	HexNAc(7)Hex(8)Fuc(1)NeuAc(4)	C[+57]*3, N[+4028]	1479.02	4	5913.07	5914.06	-1	3.1	31	Specific	269.53	269.53	269.53	3.93	666	>sp|P07911|UROM_HUMAN Uromodulin OS=Homo sapiens OX=9606 GN=UMOD PE=1 SV=1	1	20230315_zy_umod_tg-after.4813.4813.4	controllerType=0 controllerNumber=1 scan=4813	17.8603
R.WC[+57.021]SEC[+57.021]HSN[+3226.132]ATC[+57.021]TEDE.A	HexNAc(6)Hex(7)NeuAc(3)	C[+57]*3, N[+3226]	1278.45	4	5110.77	5111.77	-1	-0.2	31	Specific	275.56	275.56	275.56	4.33	666	>sp|P07911|UROM_HUMAN Uromodulin OS=Homo sapiens OX=9606 GN=UMOD PE=1 SV=1	1	20230315_zy_umod_tg-after.4569.4569.4	controllerType=0 controllerNumber=1 scan=4569	16.9577
R.WC[+57.021]SEC[+57.021]HSN[+3663.286]ATC[+57.021]TE.D	HexNAc(6)Hex(7)Fuc(1)NeuAc(4)	C[+57]*3, N[+3663]	1326.72	4	5303.86	5304.86	-1	1.2	31	Specific	293.92	293.92	293.92	5.38	666	>sp|P07911|UROM_HUMAN Uromodulin OS=Homo sapiens OX=9606 GN=UMOD PE=1 SV=1	1	20230315_zy_umod_tg-after.4706.4706.4	controllerType=0 controllerNumber=1 scan=4706	17.4669
R.WC[+57.021]SEC[+57.021]HSN[+3517.228]ATC[+57.021]TE.D	HexNAc(6)Hex(7)NeuAc(4)	C[+57]*3, N[+3517]	1290.46	4	5158.8	5158.8	0	0.4	31	Specific	315.06	315.06	315.06	5.05	666	>sp|P07911|UROM_HUMAN Uromodulin OS=Homo sapiens OX=9606 GN=UMOD PE=1 SV=1	1	20230315_zy_umod_tg-after.4728.4728.4	controllerType=0 controllerNumber=1 scan=4728	17.5452
R.WC[+57.021]SEC[+57.021]HSN[+3372.190]ATC[+57.021]TEDE.A	HexNAc(6)Hex(7)Fuc(1)NeuAc(3)	C[+57]*3, N[+3372]	1315.21	4	5257.83	5257.83	0	0.2	31	Specific	315.69	315.69	315.69	4.03	666	>sp|P07911|UROM_HUMAN Uromodulin OS=Homo sapiens OX=9606 GN=UMOD PE=1 SV=1	1	20230315_zy_umod_tg-after.4524.4524.4	controllerType=0 controllerNumber=1 scan=4524	16.7971
R.WC[+57.021]SEC[+57.021]HSN[+3663.286]ATC[+57.021]TE.D	HexNAc(6)Hex(7)Fuc(1)NeuAc(4)	C[+57]*3, N[+3663]	1326.97	4	5304.86	5304.86	0	0.8	31	Specific	323.79	323.79	323.79	5.09	666	>sp|P07911|UROM_HUMAN Uromodulin OS=Homo sapiens OX=9606 GN=UMOD PE=1 SV=1	1	20230315_zy_umod_tg-after.4671.4671.4	controllerType=0 controllerNumber=1 scan=4671	17.3334
R.WC[+57.021]SEC[+57.021]HSN[+3663.286]ATC[+57.021]TEDE.A	HexNAc(6)Hex(7)Fuc(1)NeuAc(4)	C[+57]*3, N[+3663]	1387.99	4	5548.93	5548.93	0	0.8	31	Specific	328.77	328.77	328.77	4.26	666	>sp|P07911|UROM_HUMAN Uromodulin OS=Homo sapiens OX=9606 GN=UMOD PE=1 SV=1	1	20230315_zy_umod_tg-after.4888.4888.4	controllerType=0 controllerNumber=1 scan=4888	18.1378
R.WC[+57.021]SEC[+57.021]HSN[+3372.190]ATC[+57.021]TE.D	HexNAc(6)Hex(7)Fuc(1)NeuAc(3)	C[+57]*3, N[+3372]	1671.93	3	5013.77	5013.76	0	1.8	31	Specific	334.62	334.62	334.62	4.75	666	>sp|P07911|UROM_HUMAN Uromodulin OS=Homo sapiens OX=9606 GN=UMOD PE=1 SV=1	1	20230315_zy_umod_tg-after.4374.4374.3	controllerType=0 controllerNumber=1 scan=4374	16.2477
R.WC[+57.021]SEC[+57.021]HSN[+3372.190]ATC[+57.021]TE.D	HexNAc(6)Hex(7)Fuc(1)NeuAc(3)	C[+57]*3, N[+3372]	1254.2	4	5013.78	5013.76	0	2.7	31	Specific	345.16	345.16	345.16	4.67	666	>sp|P07911|UROM_HUMAN Uromodulin OS=Homo sapiens OX=9606 GN=UMOD PE=1 SV=1	1	20230315_zy_umod_tg-after.4328.4328.4	controllerType=0 controllerNumber=1 scan=4328	16.0795
R.WC[+57.021]SEC[+57.021]HSN[+3372.190]ATC[+57.021]TE.D	HexNAc(6)Hex(7)Fuc(1)NeuAc(3)	C[+57]*3, N[+3372]	1254.2	4	5013.77	5013.76	0	0.6	31	Specific	347.25	347.25	347.25	5.18	666	>sp|P07911|UROM_HUMAN Uromodulin OS=Homo sapiens OX=9606 GN=UMOD PE=1 SV=1	1	20230315_zy_umod_tg-after.4377.4377.4	controllerType=0 controllerNumber=1 scan=4377	16.2574
R.WC[+57.021]SEC[+57.021]HSN[+3007.058]ATC[+57.021]TE.D	HexNAc(5)Hex(6)Fuc(1)NeuAc(3)	C[+57]*3, N[+3007]	1550.22	3	4648.64	4648.63	0	2.7	31	Specific	352.57	352.57	352.57	4.41	666	>sp|P07911|UROM_HUMAN Uromodulin OS=Homo sapiens OX=9606 GN=UMOD PE=1 SV=1	1	20230315_zy_umod_tg-after.4486.4486.3	controllerType=0 controllerNumber=1 scan=4486	16.6562
R.WC[+57.021]SEC[+57.021]HSN[+3372.190]ATC[+57.021]TE.D	HexNAc(6)Hex(7)Fuc(1)NeuAc(3)	C[+57]*3, N[+3372]	1254.2	4	5013.77	5013.76	0	1.1	31	Specific	375	375	375	6.37	666	>sp|P07911|UROM_HUMAN Uromodulin OS=Homo sapiens OX=9606 GN=UMOD PE=1 SV=1	1	20230315_zy_umod_tg-after.4412.4412.4	controllerType=0 controllerNumber=1 scan=4412	16.3889
R.WC[+57.021]SEC[+57.021]HSN[+3372.190]ATC[+57.021]TEDE.A	HexNAc(6)Hex(7)Fuc(1)NeuAc(3)	C[+57]*3, N[+3372]	1315.22	4	5257.84	5257.83	0	1.3	31	Specific	375.94	375.94	375.94	5.44	666	>sp|P07911|UROM_HUMAN Uromodulin OS=Homo sapiens OX=9606 GN=UMOD PE=1 SV=1	1	20230315_zy_umod_tg-after.4572.4572.4	controllerType=0 controllerNumber=1 scan=4572	16.9651
R.WC[+57.021]SEC[+57.021]HSN[+3663.286]ATC[+57.021]TEDE.A	HexNAc(6)Hex(7)Fuc(1)NeuAc(4)	C[+57]*3, N[+3663]	1387.99	4	5548.93	5548.93	0	1	31	Specific	385.94	385.94	385.94	5.44	666	>sp|P07911|UROM_HUMAN Uromodulin OS=Homo sapiens OX=9606 GN=UMOD PE=1 SV=1	1	20230315_zy_umod_tg-after.4927.4927.4	controllerType=0 controllerNumber=1 scan=4927	18.2665
R.WC[+57.021]SEC[+57.021]HSN[+3372.190]ATC[+57.021]TEDE.A	HexNAc(6)Hex(7)Fuc(1)NeuAc(3)	C[+57]*3, N[+3372]	1315.21	4	5257.83	5257.83	0	0.2	31	Specific	407.46	407.46	407.46	5.3	666	>sp|P07911|UROM_HUMAN Uromodulin OS=Homo sapiens OX=9606 GN=UMOD PE=1 SV=1	1	20230315_zy_umod_tg-after.4485.4485.2	controllerType=0 controllerNumber=1 scan=4485	16.6532
E.C[+57.021]HSN[+2391.857]ATC[+57.021]TE.D	HexNAc(5)Hex(4)Fuc(1)NeuAc(2)	C[+57]*2, N[+2392]	1157.75	3	3471.25	3471.24	0	1.3	35	Specific	226.92	226.92	226.92	4.08	34	>sp|P07911|UROM_HUMAN Uromodulin OS=Homo sapiens OX=9606 GN=UMOD PE=1 SV=1	1	20230315_zy_umod_g-before.2567.2567.3	controllerType=0 controllerNumber=1 scan=2567	9.5679
E.C[+57.021]HSN[+3663.286]ATC[+57.021]TEDE.A	HexNAc(6)Hex(7)Fuc(1)NeuAc(4)	C[+57]*2, N[+3663]	1247.44	4	4986.75	4986.74	0	1.7	35	Specific	238.24	238.24	238.24	3.55	34	>sp|P07911|UROM_HUMAN Uromodulin OS=Homo sapiens OX=9606 GN=UMOD PE=1 SV=1	1	20230315_zy_umod_g-before.3183.3183.4	controllerType=0 controllerNumber=1 scan=3183	11.9358
E.C[+57.021]HSN[+3663.286]ATC[+57.021]TEDEAVTTC[+57.021]TC[+57.021]QE.G	HexNAc(6)Hex(7)Fuc(1)NeuAc(4)	C[+57]*4, N[+3663]	1510.3	4	6038.19	6037.15	1	5.1	35	Specific	370.6	370.6	370.6	1.98	34	>sp|P07911|UROM_HUMAN Uromodulin OS=Homo sapiens OX=9606 GN=UMOD PE=1 SV=1	1	20230315_zy_umod_g-before.6049.6049.2	controllerType=0 controllerNumber=1 scan=6049	23.0344
E.C[+57.021]HSN[+3663.286]ATC[+57.021]TE.D	HexNAc(6)Hex(7)Fuc(1)NeuAc(4)	C[+57]*2, N[+3663]	1186.42	4	4742.68	4742.67	0	0.5	35	Specific	539	539	539	6.92	34	>sp|P07911|UROM_HUMAN Uromodulin OS=Homo sapiens OX=9606 GN=UMOD PE=1 SV=1	1	20230315_zy_umod_g-before.2939.2939.2	controllerType=0 controllerNumber=1 scan=2939	11.0018
E.C[+57.021]HSN[+2100.761]ATC[+57.021]TE.D	HexNAc(5)Hex(4)Fuc(1)NeuAc(1)	C[+57]*2, N[+2101]	1060.72	3	3180.15	3180.15	0	-0.6	35	Specific	237.06	237.06	237.06	4.99	244	>sp|P07911|UROM_HUMAN Uromodulin OS=Homo sapiens OX=9606 GN=UMOD PE=1 SV=1	1	20230315_zy_umod_g-after.2431.2431.3	controllerType=0 controllerNumber=1 scan=2431	9.0018
E.C[+57.021]HSN[+2391.857]ATC[+57.021]TE.D	HexNAc(5)Hex(4)Fuc(1)NeuAc(2)	C[+57]*2, N[+2392]	1157.75	3	3471.25	3471.24	0	1.4	35	Specific	207.1	207.1	207.1	5.37	244	>sp|P07911|UROM_HUMAN Uromodulin OS=Homo sapiens OX=9606 GN=UMOD PE=1 SV=1	1	20230315_zy_umod_g-after.2624.2624.3	controllerType=0 controllerNumber=1 scan=2624	9.7333
E.C[+57.021]HSN[+2391.857]ATC[+57.021]TEDEAVTTC[+57.021]TC[+57.021]QE.G	HexNAc(5)Hex(4)Fuc(1)NeuAc(2)	C[+57]*4, N[+2392]	1589.25	3	4765.74	4765.73	0	2.9	35	Specific	278.24	278.24	278.24	3.48	244	>sp|P07911|UROM_HUMAN Uromodulin OS=Homo sapiens OX=9606 GN=UMOD PE=1 SV=1	1	20230315_zy_umod_g-after.5166.5166.3	controllerType=0 controllerNumber=1 scan=5166	19.1637
E.C[+57.021]HSN[+2391.857]ATC[+57.021]TEDEAVTTC[+57.021]TC[+57.021]QE.G	HexNAc(5)Hex(4)Fuc(1)NeuAc(2)	C[+57]*4, N[+2392]	1192.19	4	4765.73	4765.73	0	0.2	35	Specific	290.04	290.04	290.04	3.23	244	>sp|P07911|UROM_HUMAN Uromodulin OS=Homo sapiens OX=9606 GN=UMOD PE=1 SV=1	1	20230315_zy_umod_g-after.5153.5153.4	controllerType=0 controllerNumber=1 scan=5153	19.1136
E.C[+57.021]HSN[+2391.857]ATC[+57.021]TE.D	HexNAc(5)Hex(4)Fuc(1)NeuAc(2)	C[+57]*2, N[+2392]	1157.75	3	3471.25	3471.24	0	1	35	Specific	638.08	638.08	638.08	8.51	244	>sp|P07911|UROM_HUMAN Uromodulin OS=Homo sapiens OX=9606 GN=UMOD PE=1 SV=1	1	20230315_zy_umod_g-after.2619.2619.3	controllerType=0 controllerNumber=1 scan=2619	9.7201
E.C[+57.021]HSN[+2391.857]ATC[+57.021]TEDE.A	HexNAc(5)Hex(4)Fuc(1)NeuAc(2)	C[+57]*2, N[+2392]	1239.11	3	3715.32	3715.31	0	1.5	35	Specific	803.97	803.97	803.97	10.69	244	>sp|P07911|UROM_HUMAN Uromodulin OS=Homo sapiens OX=9606 GN=UMOD PE=1 SV=1	1	20230315_zy_umod_g-after.2868.2868.3	controllerType=0 controllerNumber=1 scan=2868	10.6384
E.C[+57.021]HSN[+2715.963]ATC[+57.021]TEDE.A	HexNAc(5)Hex(6)Fuc(1)NeuAc(2)	C[+57]*2, N[+2716]	1347.15	3	4039.43	4039.42	0	1.9	35	Specific	261.97	261.97	261.97	3.53	244	>sp|P07911|UROM_HUMAN Uromodulin OS=Homo sapiens OX=9606 GN=UMOD PE=1 SV=1	1	20230315_zy_umod_g-after.2815.2815.3	controllerType=0 controllerNumber=1 scan=2815	10.442
E.C[+57.021]HSN[+2715.963]ATC[+57.021]TEDEAVTTC[+57.021]TC[+57.021]QE.G	HexNAc(5)Hex(6)Fuc(1)NeuAc(2)	C[+57]*4, N[+2716]	1272.97	4	5088.84	5089.83	-1	2.3	35	Specific	305.5	305.5	305.5	2.79	244	>sp|P07911|UROM_HUMAN Uromodulin OS=Homo sapiens OX=9606 GN=UMOD PE=1 SV=1	1	20230315_zy_umod_g-after.5126.5126.4	controllerType=0 controllerNumber=1 scan=5126	19.0095
E.C[+57.021]HSN[+3007.058]ATC[+57.021]TEDEAVTTC[+57.021]TC[+57.021]QE.G	HexNAc(5)Hex(6)Fuc(1)NeuAc(3)	C[+57]*4, N[+3007]	1793.98	3	5379.93	5380.93	-1	1.4	35	Specific	241.63	241.63	241.63	3.46	244	>sp|P07911|UROM_HUMAN Uromodulin OS=Homo sapiens OX=9606 GN=UMOD PE=1 SV=1	1	20230315_zy_umod_g-after.5681.5681.3	controllerType=0 controllerNumber=1 scan=5681	21.1015
E.C[+57.021]HSN[+3007.058]ATC[+57.021]TEDEAVTTC[+57.021]TC[+57.021]QE.G	HexNAc(5)Hex(6)Fuc(1)NeuAc(3)	C[+57]*4, N[+3007]	1345.99	4	5380.94	5380.93	0	3	35	Specific	279.57	279.57	279.57	2.64	244	>sp|P07911|UROM_HUMAN Uromodulin OS=Homo sapiens OX=9606 GN=UMOD PE=1 SV=1	1	20230315_zy_umod_g-after.5574.5574.4	controllerType=0 controllerNumber=1 scan=5574	20.7006
E.C[+57.021]HSN[+3007.058]ATC[+57.021]TEDEAVTTC[+57.021]TC[+57.021]QE.G	HexNAc(5)Hex(6)Fuc(1)NeuAc(3)	C[+57]*4, N[+3007]	1345.99	4	5380.94	5380.93	0	2	35	Specific	392.92	392.92	392.92	4.36	244	>sp|P07911|UROM_HUMAN Uromodulin OS=Homo sapiens OX=9606 GN=UMOD PE=1 SV=1	1	20230315_zy_umod_g-after.5596.5596.4	controllerType=0 controllerNumber=1 scan=5596	20.7883
E.C[+57.021]HSN[+3007.058]ATC[+57.021]TE.D	HexNAc(5)Hex(6)Fuc(1)NeuAc(3)	C[+57]*2, N[+3007]	1362.82	3	4086.45	4086.45	0	0.6	35	Specific	396.14	396.14	396.14	6.63	244	>sp|P07911|UROM_HUMAN Uromodulin OS=Homo sapiens OX=9606 GN=UMOD PE=1 SV=1	1	20230315_zy_umod_g-after.2756.2756.3	controllerType=0 controllerNumber=1 scan=2756	10.2253
E.C[+57.021]HSN[+3007.058]ATC[+57.021]TEDEAVTTC[+57.021]TC[+57.021]QE.G	HexNAc(5)Hex(6)Fuc(1)NeuAc(3)	C[+57]*4, N[+3007]	1345.74	4	5379.93	5380.93	-1	2	35	Specific	526.23	526.23	526.23	4.13	244	>sp|P07911|UROM_HUMAN Uromodulin OS=Homo sapiens OX=9606 GN=UMOD PE=1 SV=1	1	20230315_zy_umod_g-after.5679.5679.4	controllerType=0 controllerNumber=1 scan=5679	21.0953
E.C[+57.021]HSN[+2756.989]ATC[+57.021]TE.D	HexNAc(6)Hex(5)Fuc(1)NeuAc(2)	C[+57]*2, N[+2757]	1279.47	3	3836.39	3836.38	0	2.7	35	Specific	304	304	304	5	244	>sp|P07911|UROM_HUMAN Uromodulin OS=Homo sapiens OX=9606 GN=UMOD PE=1 SV=1	1	20230315_zy_umod_g-after.2703.2703.3	controllerType=0 controllerNumber=1 scan=2703	10.0285
E.C[+57.021]HSN[+3081.095]ATC[+57.021]TE.D	HexNAc(6)Hex(7)Fuc(1)NeuAc(2)	C[+57]*2, N[+3081]	1387.5	3	4160.48	4160.48	0	-0.5	35	Specific	216.66	216.66	216.66	5	244	>sp|P07911|UROM_HUMAN Uromodulin OS=Homo sapiens OX=9606 GN=UMOD PE=1 SV=1	1	20230315_zy_umod_g-after.2645.2645.3	controllerType=0 controllerNumber=1 scan=2645	9.8157
E.C[+57.021]HSN[+3081.095]ATC[+57.021]TEDEAVTTC[+57.021]TC[+57.021]QE.G	HexNAc(6)Hex(7)Fuc(1)NeuAc(2)	C[+57]*4, N[+3081]	1364.5	4	5454.98	5454.96	0	2.3	35	Specific	220.37	220.37	220.37	3.13	244	>sp|P07911|UROM_HUMAN Uromodulin OS=Homo sapiens OX=9606 GN=UMOD PE=1 SV=1	1	20230315_zy_umod_g-after.4926.4926.4	controllerType=0 controllerNumber=1 scan=4926	18.2484
E.C[+57.021]HSN[+3081.095]ATC[+57.021]TE.D	HexNAc(6)Hex(7)Fuc(1)NeuAc(2)	C[+57]*2, N[+3081]	1387.5	3	4160.49	4160.48	0	1.5	35	Specific	276.38	276.38	276.38	5.34	244	>sp|P07911|UROM_HUMAN Uromodulin OS=Homo sapiens OX=9606 GN=UMOD PE=1 SV=1	1	20230315_zy_umod_g-after.2562.2562.3	controllerType=0 controllerNumber=1 scan=2562	9.5039
E.C[+57.021]HSN[+3372.190]ATC[+57.021]TE.D	HexNAc(6)Hex(7)Fuc(1)NeuAc(3)	C[+57]*2, N[+3372]	1113.65	4	4451.59	4451.58	0	1.7	35	Specific	225.82	225.82	225.82	4.49	244	>sp|P07911|UROM_HUMAN Uromodulin OS=Homo sapiens OX=9606 GN=UMOD PE=1 SV=1	1	20230315_zy_umod_g-after.2804.2804.4	controllerType=0 controllerNumber=1 scan=2804	10.3973
E.C[+57.021]HSN[+3372.190]ATC[+57.021]TEDEAVTTC[+57.021]TC[+57.021]QE.G	HexNAc(6)Hex(7)Fuc(1)NeuAc(3)	C[+57]*4, N[+3372]	1437.27	4	5746.07	5746.06	0	2	35	Specific	237.16	237.16	237.16	3.11	244	>sp|P07911|UROM_HUMAN Uromodulin OS=Homo sapiens OX=9606 GN=UMOD PE=1 SV=1	1	20230315_zy_umod_g-after.5520.5520.4	controllerType=0 controllerNumber=1 scan=5520	20.4968
E.C[+57.021]HSN[+3372.190]ATC[+57.021]TEDE.A	HexNAc(6)Hex(7)Fuc(1)NeuAc(3)	C[+57]*2, N[+3372]	1565.89	3	4695.66	4695.65	0	3.5	35	Specific	290.42	290.42	290.42	3.19	244	>sp|P07911|UROM_HUMAN Uromodulin OS=Homo sapiens OX=9606 GN=UMOD PE=1 SV=1	1	20230315_zy_umod_g-after.2939.2939.3	controllerType=0 controllerNumber=1 scan=2939	10.8953
E.C[+57.021]HSN[+3372.190]ATC[+57.021]TE.D	HexNAc(6)Hex(7)Fuc(1)NeuAc(3)	C[+57]*2, N[+3372]	1484.53	3	4451.58	4451.58	0	1.4	35	Specific	339.35	339.35	339.35	5.52	244	>sp|P07911|UROM_HUMAN Uromodulin OS=Homo sapiens OX=9606 GN=UMOD PE=1 SV=1	1	20230315_zy_umod_g-after.2700.2700.3	controllerType=0 controllerNumber=1 scan=2700	10.0192
E.C[+57.021]HSN[+3372.190]ATC[+57.021]TEDEAVTTC[+57.021]TC[+57.021]QE.G	HexNAc(6)Hex(7)Fuc(1)NeuAc(3)	C[+57]*4, N[+3372]	1437.27	4	5746.06	5746.06	0	1	35	Specific	456.34	456.34	456.34	4.31	244	>sp|P07911|UROM_HUMAN Uromodulin OS=Homo sapiens OX=9606 GN=UMOD PE=1 SV=1	1	20230315_zy_umod_g-after.5582.5582.4	controllerType=0 controllerNumber=1 scan=5582	20.7364
E.C[+57.021]HSN[+3372.190]ATC[+57.021]TE.D	HexNAc(6)Hex(7)Fuc(1)NeuAc(3)	C[+57]*2, N[+3372]	1113.65	4	4451.59	4451.58	0	1.7	35	Specific	474.24	474.24	474.24	5.69	244	>sp|P07911|UROM_HUMAN Uromodulin OS=Homo sapiens OX=9606 GN=UMOD PE=1 SV=1	1	20230315_zy_umod_g-after.2742.2742.4	controllerType=0 controllerNumber=1 scan=2742	10.1752
E.C[+57.021]HSN[+3663.286]ATC[+57.021]TE.D	HexNAc(6)Hex(7)Fuc(1)NeuAc(4)	C[+57]*2, N[+3663]	1186.43	4	4742.68	4742.67	0	2.1	35	Specific	230.33	230.33	230.33	4.49	244	>sp|P07911|UROM_HUMAN Uromodulin OS=Homo sapiens OX=9606 GN=UMOD PE=1 SV=1	1	20230315_zy_umod_g-after.2902.2902.4	controllerType=0 controllerNumber=1 scan=2902	10.7573
E.C[+57.021]HSN[+3663.286]ATC[+57.021]TEDE.A	HexNAc(6)Hex(7)Fuc(1)NeuAc(4)	C[+57]*2, N[+3663]	1247.44	4	4986.76	4986.74	0	2.5	35	Specific	264.81	264.81	264.81	2.29	244	>sp|P07911|UROM_HUMAN Uromodulin OS=Homo sapiens OX=9606 GN=UMOD PE=1 SV=1	1	20230315_zy_umod_g-after.3156.3156.4	controllerType=0 controllerNumber=1 scan=3156	11.68
E.C[+57.021]HSN[+3663.286]ATC[+57.021]TEDEAVTTC[+57.021]TC[+57.021]QE.G	HexNAc(6)Hex(7)Fuc(1)NeuAc(4)	C[+57]*4, N[+3663]	1510.05	4	6037.17	6037.15	0	2.7	35	Specific	339.99	339.99	339.99	2.8	244	>sp|P07911|UROM_HUMAN Uromodulin OS=Homo sapiens OX=9606 GN=UMOD PE=1 SV=1	1	20230315_zy_umod_g-after.6035.6035.4	controllerType=0 controllerNumber=1 scan=6035	22.4337
E.C[+57.021]HSN[+3663.286]ATC[+57.021]TEDE.A	HexNAc(6)Hex(7)Fuc(1)NeuAc(4)	C[+57]*2, N[+3663]	1247.44	4	4986.75	4986.74	0	2.3	35	Specific	434.69	434.69	434.69	3.84	244	>sp|P07911|UROM_HUMAN Uromodulin OS=Homo sapiens OX=9606 GN=UMOD PE=1 SV=1	1	20230315_zy_umod_g-after.3193.3193.4	controllerType=0 controllerNumber=1 scan=3193	11.8164
E.C[+57.021]HSN[+3663.286]ATC[+57.021]TE.D	HexNAc(6)Hex(7)Fuc(1)NeuAc(4)	C[+57]*2, N[+3663]	1581.57	3	4742.68	4742.67	0	1.6	35	Specific	487.54	487.54	487.54	6.63	244	>sp|P07911|UROM_HUMAN Uromodulin OS=Homo sapiens OX=9606 GN=UMOD PE=1 SV=1	1	20230315_zy_umod_g-after.2896.2896.3	controllerType=0 controllerNumber=1 scan=2896	10.7406
E.C[+57.021]HSN[+3226.132]ATC[+57.021]TEDEAVTTC[+57.021]TC[+57.021]QE.G	HexNAc(6)Hex(7)NeuAc(3)	C[+57]*4, N[+3226]	1400.51	4	5599.01	5600	-1	2.9	35	Specific	241.83	241.83	241.83	2.24	244	>sp|P07911|UROM_HUMAN Uromodulin OS=Homo sapiens OX=9606 GN=UMOD PE=1 SV=1	1	20230315_zy_umod_g-after.5611.5611.4	controllerType=0 controllerNumber=1 scan=5611	20.8436
E.C[+57.021]HSN[+3226.132]ATC[+57.021]TEDEAVTTC[+57.021]TC[+57.021]QE.G	HexNAc(6)Hex(7)NeuAc(3)	C[+57]*4, N[+3226]	1400.76	4	5600.01	5600	0	1	35	Specific	258.08	258.08	258.08	3.05	244	>sp|P07911|UROM_HUMAN Uromodulin OS=Homo sapiens OX=9606 GN=UMOD PE=1 SV=1	1	20230315_zy_umod_g-after.5585.5585.4	controllerType=0 controllerNumber=1 scan=5585	20.745
E.C[+57.021]HSN[+3226.132]ATC[+57.021]TEDE.A	HexNAc(6)Hex(7)NeuAc(3)	C[+57]*2, N[+3226]	1137.9	4	4548.58	4549.59	-1	-1.7	35	Specific	298.35	298.35	298.35	2.11	244	>sp|P07911|UROM_HUMAN Uromodulin OS=Homo sapiens OX=9606 GN=UMOD PE=1 SV=1	1	20230315_zy_umod_g-after.2985.2985.4	controllerType=0 controllerNumber=1 scan=2985	11.0576
E.C[+57.021]HSN[+3226.132]ATC[+57.021]TEDE.A	HexNAc(6)Hex(7)NeuAc(3)	C[+57]*2, N[+3226]	1516.86	3	4548.58	4549.59	-1	-1.5	35	Specific	389.75	389.75	389.75	3.91	244	>sp|P07911|UROM_HUMAN Uromodulin OS=Homo sapiens OX=9606 GN=UMOD PE=1 SV=1	1	20230315_zy_umod_g-after.2981.2981.3	controllerType=0 controllerNumber=1 scan=2981	11.0456
E.C[+57.021]HSN[+3517.228]ATC[+57.021]TEDE.A	HexNAc(6)Hex(7)NeuAc(4)	C[+57]*2, N[+3517]	1614.24	3	4840.7	4840.69	0	2.4	35	Specific	481.39	481.39	481.39	4.32	244	>sp|P07911|UROM_HUMAN Uromodulin OS=Homo sapiens OX=9606 GN=UMOD PE=1 SV=1	1	20230315_zy_umod_g-after.3179.3179.3	controllerType=0 controllerNumber=1 scan=3179	11.7651
E.C[+57.021]HSN[+3517.228]ATC[+57.021]TEDE.A	HexNAc(6)Hex(7)NeuAc(4)	C[+57]*2, N[+3517]	1210.93	4	4840.69	4840.69	0	1.3	35	Specific	482.34	482.34	482.34	3.92	244	>sp|P07911|UROM_HUMAN Uromodulin OS=Homo sapiens OX=9606 GN=UMOD PE=1 SV=1	1	20230315_zy_umod_g-after.3180.3180.4	controllerType=0 controllerNumber=1 scan=3180	11.7681
E.C[+57.021]HSN[+3575.270]ATC[+57.021]TE.D	HexNAc(7)Hex(7)Fuc(1)NeuAc(3)	C[+57]*2, N[+3575]	1164.42	4	4654.66	4654.66	0	0.8	35	Specific	214.22	214.22	214.22	4.49	244	>sp|P07911|UROM_HUMAN Uromodulin OS=Homo sapiens OX=9606 GN=UMOD PE=1 SV=1	1	20230315_zy_umod_g-after.2816.2816.4	controllerType=0 controllerNumber=1 scan=2816	10.445
E.C[+57.021]HSN[+3866.365]ATC[+57.021]TE.D	HexNAc(7)Hex(7)Fuc(1)NeuAc(4)	C[+57]*2, N[+3866]	1237.2	4	4945.76	4945.75	0	2.4	35	Specific	244.06	244.06	244.06	3.93	244	>sp|P07911|UROM_HUMAN Uromodulin OS=Homo sapiens OX=9606 GN=UMOD PE=1 SV=1	1	20230315_zy_umod_g-after.2973.2973.4	controllerType=0 controllerNumber=1 scan=2973	11.0117
E.C[+57.021]HSN[+4028.418]ATC[+57.021]TE.D	HexNAc(7)Hex(8)Fuc(1)NeuAc(4)	C[+57]*2, N[+4028]	1277.71	4	5107.81	5107.81	0	1.3	35	Specific	223.06	223.06	223.06	4.49	244	>sp|P07911|UROM_HUMAN Uromodulin OS=Homo sapiens OX=9606 GN=UMOD PE=1 SV=1	1	20230315_zy_umod_g-after.2954.2954.4	controllerType=0 controllerNumber=1 scan=2954	10.9477
E.C[+57.021]HSN[+4028.418]ATC[+57.021]TEDEAVTTC[+57.021]TC[+57.021]QE.G	HexNAc(7)Hex(8)Fuc(1)NeuAc(4)	C[+57]*4, N[+4028]	1601.33	4	6402.29	6402.29	0	1.1	35	Specific	227.45	227.45	227.45	3.13	244	>sp|P07911|UROM_HUMAN Uromodulin OS=Homo sapiens OX=9606 GN=UMOD PE=1 SV=1	1	20230315_zy_umod_g-after.5913.5913.4	controllerType=0 controllerNumber=1 scan=5913	21.9765
E.C[+57.021]HSN[+4393.550]ATC[+57.021]TE.D	HexNAc(8)Hex(9)Fuc(1)NeuAc(4)	C[+57]*2, N[+4394]	1368.74	4	5471.93	5472.94	-1	-1.4	35	Specific	210.43	210.43	210.43	3.6	244	>sp|P07911|UROM_HUMAN Uromodulin OS=Homo sapiens OX=9606 GN=UMOD PE=1 SV=1	1	20230315_zy_umod_g-after.2900.2900.4	controllerType=0 controllerNumber=1 scan=2900	10.7528
E.C[+57.021]HSN[+3372.190]ATC[+57.021]TEDEAVTTC[+57.021]TC[+57.021]QE.G	HexNAc(6)Hex(7)Fuc(1)NeuAc(3)	C[+57]*4, N[+3372]	1437.02	4	5745.06	5746.06	-1	1.5	35	Specific	209.25	209.25	209.25	3.95	320	>sp|P07911|UROM_HUMAN Uromodulin OS=Homo sapiens OX=9606 GN=UMOD PE=1 SV=1	1	20230315_zy_umod_tg-before.5698.5698.4	controllerType=0 controllerNumber=1 scan=5698	21.4279
E.C[+57.021]HSN[+3372.190]ATC[+57.021]TE.D	HexNAc(6)Hex(7)Fuc(1)NeuAc(3)	C[+57]*2, N[+3372]	1484.2	3	4450.59	4451.58	-1	4.4	35	Specific	212.76	176.24	176.24	2.68	320	>sp|P07911|UROM_HUMAN Uromodulin OS=Homo sapiens OX=9606 GN=UMOD PE=1 SV=1	1	20230315_zy_umod_tg-before.2766.2766.3	controllerType=0 controllerNumber=1 scan=2766	10.4864
E.C[+57.021]HSN[+3663.286]ATC[+57.021]TEDEAVTTC[+57.021]TC[+57.021]QE.G	HexNAc(6)Hex(7)Fuc(1)NeuAc(4)	C[+57]*4, N[+3663]	1510.05	4	6037.18	6037.15	0	3.6	35	Specific	214.41	214.41	214.41	3.46	320	>sp|P07911|UROM_HUMAN Uromodulin OS=Homo sapiens OX=9606 GN=UMOD PE=1 SV=1	1	20230315_zy_umod_tg-before.6681.6681.4	controllerType=0 controllerNumber=1 scan=6681	25.0388
E.C[+57.021]HSN[+3372.190]ATC[+57.021]TEDEAVTTC[+57.021]TC[+57.021]QE.G	HexNAc(6)Hex(7)Fuc(1)NeuAc(3)	C[+57]*4, N[+3372]	1437.26	4	5746.04	5746.06	0	-3.9	35	Specific	245.17	245.17	245.17	3.27	320	>sp|P07911|UROM_HUMAN Uromodulin OS=Homo sapiens OX=9606 GN=UMOD PE=1 SV=1	1	20230315_zy_umod_tg-before.5665.5665.4	controllerType=0 controllerNumber=1 scan=5665	21.3024
E.C[+57.021]HSN[+3663.286]ATC[+57.021]TEDEAVTTC[+57.021]TC[+57.021]QE.G	HexNAc(6)Hex(7)Fuc(1)NeuAc(4)	C[+57]*4, N[+3663]	1510.05	4	6037.17	6037.15	0	1.9	35	Specific	283.5	283.5	283.5	3.47	320	>sp|P07911|UROM_HUMAN Uromodulin OS=Homo sapiens OX=9606 GN=UMOD PE=1 SV=1	1	20230315_zy_umod_tg-before.6638.6638.4	controllerType=0 controllerNumber=1 scan=6638	24.8853
E.C[+57.021]HSN[+3007.058]ATC[+57.021]TEDE.A	HexNAc(5)Hex(6)Fuc(1)NeuAc(3)	C[+57]*2, N[+3007]	1444.18	3	4330.52	4330.52	0	1.4	35	Specific	295.33	295.33	295.33	4.51	320	>sp|P07911|UROM_HUMAN Uromodulin OS=Homo sapiens OX=9606 GN=UMOD PE=1 SV=1	1	20230315_zy_umod_tg-before.3152.3152.3	controllerType=0 controllerNumber=1 scan=3152	11.9613
E.C[+57.021]HSN[+3007.058]ATC[+57.021]TEDEAVTTC[+57.021]TC[+57.021]QE.G	HexNAc(5)Hex(6)Fuc(1)NeuAc(3)	C[+57]*4, N[+3007]	1345.99	4	5380.93	5380.93	0	-0.1	35	Specific	306.59	306.59	306.59	3.8	320	>sp|P07911|UROM_HUMAN Uromodulin OS=Homo sapiens OX=9606 GN=UMOD PE=1 SV=1	1	20230315_zy_umod_tg-before.5838.5838.4	controllerType=0 controllerNumber=1 scan=5838	21.95
E.C[+57.021]HSN[+3663.286]ATC[+57.021]TE.D	HexNAc(6)Hex(7)Fuc(1)NeuAc(4)	C[+57]*2, N[+3663]	1581.23	3	4741.68	4742.67	-1	2.7	35	Specific	326.74	326.74	326.74	3.04	320	>sp|P07911|UROM_HUMAN Uromodulin OS=Homo sapiens OX=9606 GN=UMOD PE=1 SV=1	1	20230315_zy_umod_tg-before.3098.3098.3	controllerType=0 controllerNumber=1 scan=3098	11.7532
E.C[+57.021]HSN[+3663.286]ATC[+57.021]TEDEAVTTC[+57.021]TC[+57.021]QE.G	HexNAc(6)Hex(7)Fuc(1)NeuAc(4)	C[+57]*4, N[+3663]	1510.05	4	6037.17	6037.15	0	2.1	35	Specific	342.49	342.49	342.49	3.68	320	>sp|P07911|UROM_HUMAN Uromodulin OS=Homo sapiens OX=9606 GN=UMOD PE=1 SV=1	1	20230315_zy_umod_tg-before.6648.6648.4	controllerType=0 controllerNumber=1 scan=6648	24.9217
E.C[+57.021]HSN[+3226.132]ATC[+57.021]TEDE.A	HexNAc(6)Hex(7)NeuAc(3)	C[+57]*2, N[+3226]	1137.9	4	4548.58	4549.59	-1	-1.8	35	Specific	201.32	201.32	201.32	3.85	666	>sp|P07911|UROM_HUMAN Uromodulin OS=Homo sapiens OX=9606 GN=UMOD PE=1 SV=1	1	20230315_zy_umod_tg-after.2936.2936.4	controllerType=0 controllerNumber=1 scan=2936	10.9654
E.C[+57.021]HSN[+2715.963]ATC[+57.021]TEDEAVTTC[+57.021]TC[+57.021]QE.G	HexNAc(5)Hex(6)Fuc(1)NeuAc(2)	C[+57]*4, N[+2716]	1273.22	4	5089.84	5089.83	0	2	35	Specific	205.5	205.5	205.5	3.92	666	>sp|P07911|UROM_HUMAN Uromodulin OS=Homo sapiens OX=9606 GN=UMOD PE=1 SV=1	1	20230315_zy_umod_tg-after.4972.4972.4	controllerType=0 controllerNumber=1 scan=4972	18.4344
E.C[+57.021]HSN[+3866.365]ATC[+57.021]TE.D	HexNAc(7)Hex(7)Fuc(1)NeuAc(4)	C[+57]*2, N[+3866]	1237.2	4	4945.76	4945.75	0	1.4	35	Specific	207.19	207.19	207.19	2.88	666	>sp|P07911|UROM_HUMAN Uromodulin OS=Homo sapiens OX=9606 GN=UMOD PE=1 SV=1	1	20230315_zy_umod_tg-after.2919.2919.3	controllerType=0 controllerNumber=1 scan=2919	10.9034
E.C[+57.021]HSN[+3663.286]ATC[+57.021]TEDEAVTTC[+57.021]TC[+57.021]QE.G	HexNAc(6)Hex(7)Fuc(1)NeuAc(4)	C[+57]*4, N[+3663]	1208.24	5	6037.18	6037.15	0	4.9	35	Specific	207.85	207.85	207.85	3.45	666	>sp|P07911|UROM_HUMAN Uromodulin OS=Homo sapiens OX=9606 GN=UMOD PE=1 SV=1	1	20230315_zy_umod_tg-after.6050.6050.3	controllerType=0 controllerNumber=1 scan=6050	22.2444
E.C[+57.021]HSN[+3081.095]ATC[+57.021]TE.D	HexNAc(6)Hex(7)Fuc(1)NeuAc(2)	C[+57]*2, N[+3081]	1387.5	3	4160.49	4160.48	0	2.7	35	Specific	208.13	208.13	208.13	2.41	666	>sp|P07911|UROM_HUMAN Uromodulin OS=Homo sapiens OX=9606 GN=UMOD PE=1 SV=1	1	20230315_zy_umod_tg-after.2420.2420.3	controllerType=0 controllerNumber=1 scan=2420	9.049
E.C[+57.021]HSN[+2424.867]ATC[+57.021]TEDE.A	HexNAc(5)Hex(6)Fuc(1)NeuAc(1)	C[+57]*2, N[+2425]	1250.11	3	3748.33	3748.32	0	0.7	35	Specific	212.73	212.73	212.73	3.55	666	>sp|P07911|UROM_HUMAN Uromodulin OS=Homo sapiens OX=9606 GN=UMOD PE=1 SV=1	1	20230315_zy_umod_tg-after.2645.2645.3	controllerType=0 controllerNumber=1 scan=2645	9.8902
E.C[+57.021]HSN[+3517.228]ATC[+57.021]TEDEAVTTC[+57.021]TC[+57.021]QE.G	HexNAc(6)Hex(7)NeuAc(4)	C[+57]*4, N[+3517]	1473.78	4	5892.11	5891.1	1	2.5	35	Specific	213.75	213.75	213.75	3.92	666	>sp|P07911|UROM_HUMAN Uromodulin OS=Homo sapiens OX=9606 GN=UMOD PE=1 SV=1	1	20230315_zy_umod_tg-after.6066.6066.4	controllerType=0 controllerNumber=1 scan=6066	22.3014
E.C[+57.021]HSN[+3372.190]ATC[+57.021]TEDEAVTTC[+57.021]TC[+57.021]QE.G	HexNAc(6)Hex(7)Fuc(1)NeuAc(3)	C[+57]*4, N[+3372]	1437.27	4	5746.06	5746.06	0	-0.2	35	Specific	214.53	214.53	214.53	3.99	666	>sp|P07911|UROM_HUMAN Uromodulin OS=Homo sapiens OX=9606 GN=UMOD PE=1 SV=1	1	20230315_zy_umod_tg-after.7734.7734.4	controllerType=0 controllerNumber=1 scan=7734	28.1831
E.C[+57.021]HSN[+3210.137]ATC[+57.021]TEDEAVTTC[+57.021]TC[+57.021]QE.G	HexNAc(6)Hex(6)Fuc(1)NeuAc(3)	C[+57]*4, N[+3210]	1396.5	4	5582.99	5584.01	-1	-1.7	35	Specific	217.52	217.52	217.52	4.14	666	>sp|P07911|UROM_HUMAN Uromodulin OS=Homo sapiens OX=9606 GN=UMOD PE=1 SV=1	1	20230315_zy_umod_tg-after.5491.5491.4	controllerType=0 controllerNumber=1 scan=5491	20.3208
E.C[+57.021]HSN[+2715.963]ATC[+57.021]TEDEAVTTC[+57.021]TC[+57.021]QE.G	HexNAc(5)Hex(6)Fuc(1)NeuAc(2)	C[+57]*4, N[+2716]	1273.22	4	5089.84	5089.83	0	1.8	35	Specific	217.59	217.59	217.59	3.92	666	>sp|P07911|UROM_HUMAN Uromodulin OS=Homo sapiens OX=9606 GN=UMOD PE=1 SV=1	1	20230315_zy_umod_tg-after.5000.5000.4	controllerType=0 controllerNumber=1 scan=5000	18.5346
E.C[+57.021]HSN[+2935.037]ATC[+57.021]TE.D	HexNAc(6)Hex(7)NeuAc(2)	C[+57]*2, N[+2935]	1338.82	3	4014.43	4014.42	0	2.3	35	Specific	222.09	222.09	222.09	2.5	666	>sp|P07911|UROM_HUMAN Uromodulin OS=Homo sapiens OX=9606 GN=UMOD PE=1 SV=1	1	20230315_zy_umod_tg-after.2445.2445.3	controllerType=0 controllerNumber=1 scan=2445	9.1448
E.C[+57.021]HSN[+3517.228]ATC[+57.021]TEDEAVTTC[+57.021]TC[+57.021]QE.G	HexNAc(6)Hex(7)NeuAc(4)	C[+57]*4, N[+3517]	1473.78	4	5892.11	5891.1	1	1.1	35	Specific	226.22	226.22	226.22	3.95	666	>sp|P07911|UROM_HUMAN Uromodulin OS=Homo sapiens OX=9606 GN=UMOD PE=1 SV=1	1	20230315_zy_umod_tg-after.8424.8424.4	controllerType=0 controllerNumber=1 scan=8424	30.6753
E.C[+57.021]HSN[+3575.270]ATC[+57.021]TEDE.A	HexNAc(7)Hex(7)Fuc(1)NeuAc(3)	C[+57]*2, N[+3575]	1225.44	4	4898.73	4898.73	0	-0.4	35	Specific	226.92	226.92	226.92	3.56	666	>sp|P07911|UROM_HUMAN Uromodulin OS=Homo sapiens OX=9606 GN=UMOD PE=1 SV=1	1	20230315_zy_umod_tg-after.3016.3016.4	controllerType=0 controllerNumber=1 scan=3016	11.2506
E.C[+57.021]HSN[+3663.286]ATC[+57.021]TEDE.A	HexNAc(6)Hex(7)Fuc(1)NeuAc(4)	C[+57]*2, N[+3663]	1662.92	3	4986.75	4986.74	0	1.9	35	Specific	227.27	227.27	227.27	3.25	666	>sp|P07911|UROM_HUMAN Uromodulin OS=Homo sapiens OX=9606 GN=UMOD PE=1 SV=1	1	20230315_zy_umod_tg-after.4012.4012.3	controllerType=0 controllerNumber=1 scan=4012	14.8985
E.C[+57.021]HSN[+3663.286]ATC[+57.021]TE.D	HexNAc(6)Hex(7)Fuc(1)NeuAc(4)	C[+57]*2, N[+3663]	1186.43	4	4742.68	4742.67	0	1.8	35	Specific	227.61	227.61	227.61	2.65	666	>sp|P07911|UROM_HUMAN Uromodulin OS=Homo sapiens OX=9606 GN=UMOD PE=1 SV=1	1	20230315_zy_umod_tg-after.2844.2844.4	controllerType=0 controllerNumber=1 scan=2844	10.6257
E.C[+57.021]HSN[+4028.418]ATC[+57.021]TE.D	HexNAc(7)Hex(8)Fuc(1)NeuAc(4)	C[+57]*2, N[+4028]	1277.71	4	5107.81	5107.81	0	0.5	35	Specific	227.92	227.92	227.92	2.77	666	>sp|P07911|UROM_HUMAN Uromodulin OS=Homo sapiens OX=9606 GN=UMOD PE=1 SV=1	1	20230315_zy_umod_tg-after.2888.2888.4	controllerType=0 controllerNumber=1 scan=2888	10.7916
E.C[+57.021]HSN[+2756.989]ATC[+57.021]TEDE.A	HexNAc(6)Hex(5)Fuc(1)NeuAc(2)	C[+57]*2, N[+2757]	1360.82	3	4080.45	4080.45	0	0.1	35	Specific	228.4	228.4	228.4	3.32	666	>sp|P07911|UROM_HUMAN Uromodulin OS=Homo sapiens OX=9606 GN=UMOD PE=1 SV=1	1	20230315_zy_umod_tg-after.2798.2798.3	controllerType=0 controllerNumber=1 scan=2798	10.46
E.C[+57.021]HSN[+3575.270]ATC[+57.021]TE.D	HexNAc(7)Hex(7)Fuc(1)NeuAc(3)	C[+57]*2, N[+3575]	1164.42	4	4654.66	4654.66	0	0.9	35	Specific	234.75	130.54	130.54	0.89	666	>sp|P07911|UROM_HUMAN Uromodulin OS=Homo sapiens OX=9606 GN=UMOD PE=1 SV=1	1	20230315_zy_umod_tg-after.2769.2769.4	controllerType=0 controllerNumber=1 scan=2769	10.3527
E.C[+57.021]HSN[+2391.857]ATC[+57.021]TE.D	HexNAc(5)Hex(4)Fuc(1)NeuAc(2)	C[+57]*2, N[+2392]	1157.75	3	3471.25	3471.24	0	1	35	Specific	239.69	239.69	239.69	2.6	666	>sp|P07911|UROM_HUMAN Uromodulin OS=Homo sapiens OX=9606 GN=UMOD PE=1 SV=1	1	20230315_zy_umod_tg-after.2571.2571.3	controllerType=0 controllerNumber=1 scan=2571	9.615
E.C[+57.021]HSN[+3007.058]ATC[+57.021]TEDEAVTTC[+57.021]TC[+57.021]QE.G	HexNAc(5)Hex(6)Fuc(1)NeuAc(3)	C[+57]*4, N[+3007]	1794.32	3	5380.94	5380.93	0	2.3	35	Specific	240.29	240.29	240.29	3.77	666	>sp|P07911|UROM_HUMAN Uromodulin OS=Homo sapiens OX=9606 GN=UMOD PE=1 SV=1	1	20230315_zy_umod_tg-after.6062.6062.3	controllerType=0 controllerNumber=1 scan=6062	22.2813
E.C[+57.021]HSN[+2391.857]ATC[+57.021]TEDE.A	HexNAc(5)Hex(4)Fuc(1)NeuAc(2)	C[+57]*2, N[+2392]	1239.11	3	3715.32	3715.31	0	0.7	35	Specific	240.47	240.47	240.47	3.65	666	>sp|P07911|UROM_HUMAN Uromodulin OS=Homo sapiens OX=9606 GN=UMOD PE=1 SV=1	1	20230315_zy_umod_tg-after.2815.2815.3	controllerType=0 controllerNumber=1 scan=2815	10.5188
E.C[+57.021]HSN[+3575.270]ATC[+57.021]TEDEAVTTC[+57.021]TC[+57.021]QE.G	HexNAc(7)Hex(7)Fuc(1)NeuAc(3)	C[+57]*4, N[+3575]	1488.04	4	5949.14	5949.14	0	0.9	35	Specific	242.37	221.3	221.3	4.2	666	>sp|P07911|UROM_HUMAN Uromodulin OS=Homo sapiens OX=9606 GN=UMOD PE=1 SV=1	1	20230315_zy_umod_tg-after.5637.5637.4	controllerType=0 controllerNumber=1 scan=5637	20.8419
E.C[+57.021]HSN[+3663.286]ATC[+57.021]TEDE.A	HexNAc(6)Hex(7)Fuc(1)NeuAc(4)	C[+57]*2, N[+3663]	1662.92	3	4986.74	4986.74	0	-0.3	35	Specific	247.6	247.6	247.6	3.55	666	>sp|P07911|UROM_HUMAN Uromodulin OS=Homo sapiens OX=9606 GN=UMOD PE=1 SV=1	1	20230315_zy_umod_tg-after.4024.4024.3	controllerType=0 controllerNumber=1 scan=4024	14.9444
E.C[+57.021]HSN[+3048.084]ATC[+57.021]TEDEAVTTC[+57.021]TC[+57.021]QE.G	HexNAc(6)Hex(5)Fuc(1)NeuAc(3)	C[+57]*4, N[+3048]	1355.99	4	5420.96	5421.95	-1	1.3	35	Specific	250.13	250.13	250.13	4.52	666	>sp|P07911|UROM_HUMAN Uromodulin OS=Homo sapiens OX=9606 GN=UMOD PE=1 SV=1	1	20230315_zy_umod_tg-after.5646.5646.4	controllerType=0 controllerNumber=1 scan=5646	20.8687
E.C[+57.021]HSN[+2715.963]ATC[+57.021]TEDEAVTTC[+57.021]TC[+57.021]QE.G	HexNAc(5)Hex(6)Fuc(1)NeuAc(2)	C[+57]*4, N[+2716]	1272.96	4	5088.84	5089.83	-1	1.7	35	Specific	253.51	253.51	253.51	4.34	666	>sp|P07911|UROM_HUMAN Uromodulin OS=Homo sapiens OX=9606 GN=UMOD PE=1 SV=1	1	20230315_zy_umod_tg-after.5033.5033.4	controllerType=0 controllerNumber=1 scan=5033	18.6532
E.C[+57.021]HSN[+3663.286]ATC[+57.021]TEDEAVTTC[+57.021]TC[+57.021]QE.G	HexNAc(6)Hex(7)Fuc(1)NeuAc(4)	C[+57]*4, N[+3663]	1208.04	5	6036.16	6037.15	-1	1.6	35	Specific	258.33	258.33	258.33	4.34	666	>sp|P07911|UROM_HUMAN Uromodulin OS=Homo sapiens OX=9606 GN=UMOD PE=1 SV=1	1	20230315_zy_umod_tg-after.6083.6083.5	controllerType=0 controllerNumber=1 scan=6083	22.3637
E.C[+57.021]HSN[+3575.270]ATC[+57.021]TEDEAVTTC[+57.021]TC[+57.021]QE.G	HexNAc(7)Hex(7)Fuc(1)NeuAc(3)	C[+57]*4, N[+3575]	1488.04	4	5949.15	5949.14	0	2.2	35	Specific	259.36	232.49	232.49	4.02	666	>sp|P07911|UROM_HUMAN Uromodulin OS=Homo sapiens OX=9606 GN=UMOD PE=1 SV=1	1	20230315_zy_umod_tg-after.5623.5623.4	controllerType=0 controllerNumber=1 scan=5623	20.7907
E.C[+57.021]HSN[+2715.963]ATC[+57.021]TEDE.A	HexNAc(5)Hex(6)Fuc(1)NeuAc(2)	C[+57]*2, N[+2716]	1347.15	3	4039.42	4039.42	0	1.1	35	Specific	270.01	270.01	270.01	3.65	666	>sp|P07911|UROM_HUMAN Uromodulin OS=Homo sapiens OX=9606 GN=UMOD PE=1 SV=1	1	20230315_zy_umod_tg-after.2906.2906.3	controllerType=0 controllerNumber=1 scan=2906	10.8574
E.C[+57.021]HSN[+3007.058]ATC[+57.021]TEDEAVTTC[+57.021]TC[+57.021]QE.G	HexNAc(5)Hex(6)Fuc(1)NeuAc(3)	C[+57]*4, N[+3007]	1345.99	4	5380.94	5380.93	0	2.5	35	Specific	280.8	280.8	280.8	3.92	666	>sp|P07911|UROM_HUMAN Uromodulin OS=Homo sapiens OX=9606 GN=UMOD PE=1 SV=1	1	20230315_zy_umod_tg-after.5562.5562.4	controllerType=0 controllerNumber=1 scan=5562	20.5731
E.C[+57.021]HSN[+3081.095]ATC[+57.021]TEDEAVTTC[+57.021]TC[+57.021]QE.G	HexNAc(6)Hex(7)Fuc(1)NeuAc(2)	C[+57]*4, N[+3081]	1364.5	4	5454.98	5454.96	0	3.7	35	Specific	284.46	284.46	284.46	3.59	666	>sp|P07911|UROM_HUMAN Uromodulin OS=Homo sapiens OX=9606 GN=UMOD PE=1 SV=1	1	20230315_zy_umod_tg-after.4944.4944.4	controllerType=0 controllerNumber=1 scan=4944	18.3297
E.C[+57.021]HSN[+3048.084]ATC[+57.021]TEDEAVTTC[+57.021]TC[+57.021]QE.G	HexNAc(6)Hex(5)Fuc(1)NeuAc(3)	C[+57]*4, N[+3048]	1356.24	4	5421.94	5421.95	0	-1.6	35	Specific	287.21	287.21	287.21	3.82	666	>sp|P07911|UROM_HUMAN Uromodulin OS=Homo sapiens OX=9606 GN=UMOD PE=1 SV=1	1	20230315_zy_umod_tg-after.5611.5611.4	controllerType=0 controllerNumber=1 scan=5611	20.7502
E.C[+57.021]HSN[+3866.365]ATC[+57.021]TEDEAVTTC[+57.021]TC[+57.021]QE.G	HexNAc(7)Hex(7)Fuc(1)NeuAc(4)	C[+57]*4, N[+3866]	1560.57	4	6239.24	6240.23	-1	1.7	35	Specific	292.67	292.67	292.67	4.35	666	>sp|P07911|UROM_HUMAN Uromodulin OS=Homo sapiens OX=9606 GN=UMOD PE=1 SV=1	1	20230315_zy_umod_tg-after.6072.6072.4	controllerType=0 controllerNumber=1 scan=6072	22.3212
E.C[+57.021]HSN[+3226.132]ATC[+57.021]TEDEAVTTC[+57.021]TC[+57.021]QE.G	HexNAc(6)Hex(7)NeuAc(3)	C[+57]*4, N[+3226]	1400.76	4	5600.02	5600	0	2.7	35	Specific	297.16	297.16	297.16	3.7	666	>sp|P07911|UROM_HUMAN Uromodulin OS=Homo sapiens OX=9606 GN=UMOD PE=1 SV=1	1	20230315_zy_umod_tg-after.5620.5620.4	controllerType=0 controllerNumber=1 scan=5620	20.7767
E.C[+57.021]HSN[+3866.365]ATC[+57.021]TEDEAVTTC[+57.021]TC[+57.021]QE.G	HexNAc(7)Hex(7)Fuc(1)NeuAc(4)	C[+57]*4, N[+3866]	1560.81	4	6240.23	6240.23	0	-0.2	35	Specific	297.95	297.95	297.95	4.1	666	>sp|P07911|UROM_HUMAN Uromodulin OS=Homo sapiens OX=9606 GN=UMOD PE=1 SV=1	1	20230315_zy_umod_tg-after.6135.6135.4	controllerType=0 controllerNumber=1 scan=6135	22.5468
E.C[+57.021]HSN[+3663.286]ATC[+57.021]TEDE.A	HexNAc(6)Hex(7)Fuc(1)NeuAc(4)	C[+57]*2, N[+3663]	1662.92	3	4986.75	4986.74	0	1	35	Specific	302.31	302.31	302.31	3.66	666	>sp|P07911|UROM_HUMAN Uromodulin OS=Homo sapiens OX=9606 GN=UMOD PE=1 SV=1	1	20230315_zy_umod_tg-after.3134.3134.3	controllerType=0 controllerNumber=1 scan=3134	11.6828
E.C[+57.021]HSN[+3663.286]ATC[+57.021]TEDEAVTTC[+57.021]TC[+57.021]QE.G	HexNAc(6)Hex(7)Fuc(1)NeuAc(4)	C[+57]*4, N[+3663]	1510.04	4	6037.16	6037.15	0	0.5	35	Specific	304.65	304.65	304.65	4.2	666	>sp|P07911|UROM_HUMAN Uromodulin OS=Homo sapiens OX=9606 GN=UMOD PE=1 SV=1	1	20230315_zy_umod_tg-after.6105.6105.4	controllerType=0 controllerNumber=1 scan=6105	22.437
E.C[+57.021]HSN[+2391.857]ATC[+57.021]TEDEAVTTC[+57.021]TC[+57.021]QE.G	HexNAc(5)Hex(4)Fuc(1)NeuAc(2)	C[+57]*4, N[+2392]	1192.19	4	4765.72	4765.73	0	-0.6	35	Specific	306.02	306.02	306.02	4.1	666	>sp|P07911|UROM_HUMAN Uromodulin OS=Homo sapiens OX=9606 GN=UMOD PE=1 SV=1	1	20230315_zy_umod_tg-after.5162.5162.4	controllerType=0 controllerNumber=1 scan=5162	19.1245
E.C[+57.021]HSN[+3007.058]ATC[+57.021]TEDEAVTTC[+57.021]TC[+57.021]QE.G	HexNAc(5)Hex(6)Fuc(1)NeuAc(3)	C[+57]*4, N[+3007]	1345.74	4	5379.93	5380.93	-1	1.1	35	Specific	308.89	308.89	308.89	4.52	666	>sp|P07911|UROM_HUMAN Uromodulin OS=Homo sapiens OX=9606 GN=UMOD PE=1 SV=1	1	20230315_zy_umod_tg-after.5692.5692.4	controllerType=0 controllerNumber=1 scan=5692	21.0283
E.C[+57.021]HSN[+3081.095]ATC[+57.021]TEDEAVTTC[+57.021]TC[+57.021]QE.G	HexNAc(6)Hex(7)Fuc(1)NeuAc(2)	C[+57]*4, N[+3081]	1364.5	4	5454.96	5454.96	0	0.1	35	Specific	310.87	310.87	310.87	4.1	666	>sp|P07911|UROM_HUMAN Uromodulin OS=Homo sapiens OX=9606 GN=UMOD PE=1 SV=1	1	20230315_zy_umod_tg-after.4896.4896.4	controllerType=0 controllerNumber=1 scan=4896	18.1606
E.C[+57.021]HSN[+3081.095]ATC[+57.021]TEDEAVTTC[+57.021]TC[+57.021]QE.G	HexNAc(6)Hex(7)Fuc(1)NeuAc(2)	C[+57]*4, N[+3081]	1364.5	4	5454.97	5454.96	0	0.3	35	Specific	311.27	311.27	311.27	4.1	666	>sp|P07911|UROM_HUMAN Uromodulin OS=Homo sapiens OX=9606 GN=UMOD PE=1 SV=1	1	20230315_zy_umod_tg-after.4995.4995.4	controllerType=0 controllerNumber=1 scan=4995	18.5114
E.C[+57.021]HSN[+3372.190]ATC[+57.021]TEDEAVTTC[+57.021]TC[+57.021]QE.G	HexNAc(6)Hex(7)Fuc(1)NeuAc(3)	C[+57]*4, N[+3372]	1437.52	4	5747.04	5746.06	1	-3.3	35	Specific	312.12	312.12	312.12	3.52	666	>sp|P07911|UROM_HUMAN Uromodulin OS=Homo sapiens OX=9606 GN=UMOD PE=1 SV=1	1	20230315_zy_umod_tg-after.5645.5645.4	controllerType=0 controllerNumber=1 scan=5645	20.8657
E.C[+57.021]HSN[+3575.270]ATC[+57.021]TEDEAVTTC[+57.021]TC[+57.021]QE.G	HexNAc(7)Hex(7)Fuc(1)NeuAc(3)	C[+57]*4, N[+3575]	1488.03	4	5949.11	5949.14	0	-3.9	35	Specific	316.02	316.02	316.02	3.52	666	>sp|P07911|UROM_HUMAN Uromodulin OS=Homo sapiens OX=9606 GN=UMOD PE=1 SV=1	1	20230315_zy_umod_tg-after.5602.5602.4	controllerType=0 controllerNumber=1 scan=5602	20.7145
E.C[+57.021]HSN[+3575.270]ATC[+57.021]TEDEAVTTC[+57.021]TC[+57.021]QE.G	HexNAc(7)Hex(7)Fuc(1)NeuAc(3)	C[+57]*4, N[+3575]	1488.04	4	5949.14	5949.14	0	0.6	35	Specific	330.45	330.45	330.45	4.33	666	>sp|P07911|UROM_HUMAN Uromodulin OS=Homo sapiens OX=9606 GN=UMOD PE=1 SV=1	1	20230315_zy_umod_tg-after.5500.5500.4	controllerType=0 controllerNumber=1 scan=5500	20.3539
E.C[+57.021]HSN[+3007.058]ATC[+57.021]TE.D	HexNAc(5)Hex(6)Fuc(1)NeuAc(3)	C[+57]*2, N[+3007]	1362.49	3	4085.45	4086.45	-1	2.4	35	Specific	334.51	116.25	116.25	1.11	666	>sp|P07911|UROM_HUMAN Uromodulin OS=Homo sapiens OX=9606 GN=UMOD PE=1 SV=1	1	20230315_zy_umod_tg-after.2910.2910.3	controllerType=0 controllerNumber=1 scan=2910	10.8683
E.C[+57.021]HSN[+3372.190]ATC[+57.021]TE.D	HexNAc(6)Hex(7)Fuc(1)NeuAc(3)	C[+57]*2, N[+3372]	1113.65	4	4451.58	4451.58	0	1.3	35	Specific	356.33	356.33	356.33	3.08	666	>sp|P07911|UROM_HUMAN Uromodulin OS=Homo sapiens OX=9606 GN=UMOD PE=1 SV=1	1	20230315_zy_umod_tg-after.2687.2687.4	controllerType=0 controllerNumber=1 scan=2687	10.047
E.C[+57.021]HSN[+3866.365]ATC[+57.021]TE.D	HexNAc(7)Hex(7)Fuc(1)NeuAc(4)	C[+57]*2, N[+3866]	1236.94	4	4944.76	4945.75	-1	1.5	35	Specific	393.85	194.81	194.81	3.24	666	>sp|P07911|UROM_HUMAN Uromodulin OS=Homo sapiens OX=9606 GN=UMOD PE=1 SV=1	1	20230315_zy_umod_tg-after.2923.2923.4	controllerType=0 controllerNumber=1 scan=2923	10.9158
E.C[+57.021]HSN[+3866.365]ATC[+57.021]TEDE.A	HexNAc(7)Hex(7)Fuc(1)NeuAc(4)	C[+57]*2, N[+3866]	1298.21	4	5189.83	5189.82	0	2.1	35	Specific	408.05	408.05	408.05	5.01	666	>sp|P07911|UROM_HUMAN Uromodulin OS=Homo sapiens OX=9606 GN=UMOD PE=1 SV=1	1	20230315_zy_umod_tg-after.3179.3179.4	controllerType=0 controllerNumber=1 scan=3179	11.8415
E.C[+57.021]HSN[+3226.132]ATC[+57.021]TEDEAVTTC[+57.021]TC[+57.021]QE.G	HexNAc(6)Hex(7)NeuAc(3)	C[+57]*4, N[+3226]	1400.51	4	5599.01	5600	-1	2.2	35	Specific	409.34	409.34	409.34	5.63	666	>sp|P07911|UROM_HUMAN Uromodulin OS=Homo sapiens OX=9606 GN=UMOD PE=1 SV=1	1	20230315_zy_umod_tg-after.5572.5572.4	controllerType=0 controllerNumber=1 scan=5572	20.6101
E.C[+57.021]HSN[+3007.058]ATC[+57.021]TEDEAVTTC[+57.021]TC[+57.021]QE.G	HexNAc(5)Hex(6)Fuc(1)NeuAc(3)	C[+57]*4, N[+3007]	1345.99	4	5380.93	5380.93	0	1.2	35	Specific	430.45	430.45	430.45	5.48	666	>sp|P07911|UROM_HUMAN Uromodulin OS=Homo sapiens OX=9606 GN=UMOD PE=1 SV=1	1	20230315_zy_umod_tg-after.5585.5585.4	controllerType=0 controllerNumber=1 scan=5585	20.6558
E.C[+57.021]HSN[+2715.963]ATC[+57.021]TE.D	HexNAc(5)Hex(6)Fuc(1)NeuAc(2)	C[+57]*2, N[+2716]	1265.79	3	3795.35	3795.35	0	0	35	Specific	435.33	435.33	435.33	3.82	666	>sp|P07911|UROM_HUMAN Uromodulin OS=Homo sapiens OX=9606 GN=UMOD PE=1 SV=1	1	20230315_zy_umod_tg-after.2586.2586.3	controllerType=0 controllerNumber=1 scan=2586	9.6704
E.C[+57.021]HSN[+3372.190]ATC[+57.021]TEDEAVTTC[+57.021]TC[+57.021]QE.G	HexNAc(6)Hex(7)Fuc(1)NeuAc(3)	C[+57]*4, N[+3372]	1437.27	4	5746.06	5746.06	0	0.2	35	Specific	442.41	442.41	442.41	5.36	666	>sp|P07911|UROM_HUMAN Uromodulin OS=Homo sapiens OX=9606 GN=UMOD PE=1 SV=1	1	20230315_zy_umod_tg-after.5453.5453.4	controllerType=0 controllerNumber=1 scan=5453	20.1908
E.C[+57.021]HSN[+3575.270]ATC[+57.021]TE.D	HexNAc(7)Hex(7)Fuc(1)NeuAc(3)	C[+57]*2, N[+3575]	1552.23	3	4654.67	4654.66	0	1.9	35	Specific	449.18	344.62	344.62	2.75	666	>sp|P07911|UROM_HUMAN Uromodulin OS=Homo sapiens OX=9606 GN=UMOD PE=1 SV=1	1	20230315_zy_umod_tg-after.2768.2768.3	controllerType=0 controllerNumber=1 scan=2768	10.3497
E.C[+57.021]HSN[+3007.058]ATC[+57.021]TEDEAVTTC[+57.021]TC[+57.021]QE.G	HexNAc(5)Hex(6)Fuc(1)NeuAc(3)	C[+57]*4, N[+3007]	1345.99	4	5380.93	5380.93	0	1	35	Specific	463.97	463.97	463.97	5.46	666	>sp|P07911|UROM_HUMAN Uromodulin OS=Homo sapiens OX=9606 GN=UMOD PE=1 SV=1	1	20230315_zy_umod_tg-after.5685.5685.4	controllerType=0 controllerNumber=1 scan=5685	21.0112
E.C[+57.021]HSN[+3081.095]ATC[+57.021]TEDEAVTTC[+57.021]TC[+57.021]QE.G	HexNAc(6)Hex(7)Fuc(1)NeuAc(2)	C[+57]*4, N[+3081]	1364.5	4	5454.97	5454.96	0	0.8	35	Specific	468.57	468.57	468.57	5.46	666	>sp|P07911|UROM_HUMAN Uromodulin OS=Homo sapiens OX=9606 GN=UMOD PE=1 SV=1	1	20230315_zy_umod_tg-after.5003.5003.4	controllerType=0 controllerNumber=1 scan=5003	18.5449
E.C[+57.021]HSN[+3226.132]ATC[+57.021]TEDE.A	HexNAc(6)Hex(7)NeuAc(3)	C[+57]*2, N[+3226]	1516.86	3	4548.58	4549.59	-1	-2.3	35	Specific	476.34	476.34	476.34	4.81	666	>sp|P07911|UROM_HUMAN Uromodulin OS=Homo sapiens OX=9606 GN=UMOD PE=1 SV=1	1	20230315_zy_umod_tg-after.2935.2935.3	controllerType=0 controllerNumber=1 scan=2935	10.9631
E.C[+57.021]HSN[+3081.095]ATC[+57.021]TEDE.A	HexNAc(6)Hex(7)Fuc(1)NeuAc(2)	C[+57]*2, N[+3081]	1468.86	3	4404.56	4404.55	0	1.2	35	Specific	491.74	491.74	491.74	5.02	666	>sp|P07911|UROM_HUMAN Uromodulin OS=Homo sapiens OX=9606 GN=UMOD PE=1 SV=1	1	20230315_zy_umod_tg-after.2739.2739.3	controllerType=0 controllerNumber=1 scan=2739	10.2397
E.C[+57.021]HSN[+2391.857]ATC[+57.021]TEDE.A	HexNAc(5)Hex(4)Fuc(1)NeuAc(2)	C[+57]*2, N[+2392]	1239.11	3	3715.31	3715.31	0	-0.1	35	Specific	502.88	502.88	502.88	4.91	666	>sp|P07911|UROM_HUMAN Uromodulin OS=Homo sapiens OX=9606 GN=UMOD PE=1 SV=1	1	20230315_zy_umod_tg-after.2823.2823.3	controllerType=0 controllerNumber=1 scan=2823	10.5534
E.C[+57.021]HSN[+3081.095]ATC[+57.021]TEDEAVTTC[+57.021]TC[+57.021]QE.G	HexNAc(6)Hex(7)Fuc(1)NeuAc(2)	C[+57]*4, N[+3081]	1364.5	4	5454.96	5454.96	0	-0.2	35	Specific	521.78	521.78	521.78	5.6	666	>sp|P07911|UROM_HUMAN Uromodulin OS=Homo sapiens OX=9606 GN=UMOD PE=1 SV=1	1	20230315_zy_umod_tg-after.4889.4889.4	controllerType=0 controllerNumber=1 scan=4889	18.1402
E.C[+57.021]HSN[+3372.190]ATC[+57.021]TEDE.A	HexNAc(6)Hex(7)Fuc(1)NeuAc(3)	C[+57]*2, N[+3372]	1565.89	3	4695.65	4695.65	0	1	35	Specific	526.88	526.88	526.88	5.15	666	>sp|P07911|UROM_HUMAN Uromodulin OS=Homo sapiens OX=9606 GN=UMOD PE=1 SV=1	1	20230315_zy_umod_tg-after.2908.2908.3	controllerType=0 controllerNumber=1 scan=2908	10.8624
E.C[+57.021]HSN[+3372.190]ATC[+57.021]TEDEAVTTC[+57.021]TC[+57.021]QE.G	HexNAc(6)Hex(7)Fuc(1)NeuAc(3)	C[+57]*4, N[+3372]	1437.02	4	5745.07	5746.06	-1	2.1	35	Specific	532.17	532.17	532.17	5.85	666	>sp|P07911|UROM_HUMAN Uromodulin OS=Homo sapiens OX=9606 GN=UMOD PE=1 SV=1	1	20230315_zy_umod_tg-after.5344.5344.2	controllerType=0 controllerNumber=1 scan=5344	19.7914
E.C[+57.021]HSN[+3372.190]ATC[+57.021]TE.D	HexNAc(6)Hex(7)Fuc(1)NeuAc(3)	C[+57]*2, N[+3372]	1484.53	3	4451.58	4451.58	0	0.8	35	Specific	537.6	537.6	537.6	4.15	666	>sp|P07911|UROM_HUMAN Uromodulin OS=Homo sapiens OX=9606 GN=UMOD PE=1 SV=1	1	20230315_zy_umod_tg-after.2670.2670.3	controllerType=0 controllerNumber=1 scan=2670	9.9859
E.C[+57.021]HSN[+3226.132]ATC[+57.021]TE.D	HexNAc(6)Hex(7)NeuAc(3)	C[+57]*2, N[+3226]	1435.85	3	4305.53	4305.52	0	2.3	35	Specific	537.7	537.7	537.7	3.98	666	>sp|P07911|UROM_HUMAN Uromodulin OS=Homo sapiens OX=9606 GN=UMOD PE=1 SV=1	1	20230315_zy_umod_tg-after.2616.2616.3	controllerType=0 controllerNumber=1 scan=2616	9.7821
E.C[+57.021]HSN[+2391.857]ATC[+57.021]TEDEAVTTC[+57.021]TC[+57.021]QE.G	HexNAc(5)Hex(4)Fuc(1)NeuAc(2)	C[+57]*4, N[+2392]	1588.92	3	4764.74	4765.73	-1	3.2	35	Specific	539.88	539.88	539.88	5.26	666	>sp|P07911|UROM_HUMAN Uromodulin OS=Homo sapiens OX=9606 GN=UMOD PE=1 SV=1	1	20230315_zy_umod_tg-after.5145.5145.3	controllerType=0 controllerNumber=1 scan=5145	19.0664
E.C[+57.021]HSN[+3007.058]ATC[+57.021]TE.D	HexNAc(5)Hex(6)Fuc(1)NeuAc(3)	C[+57]*2, N[+3007]	1362.82	3	4086.45	4086.45	0	0.8	35	Specific	549.39	549.39	549.39	4.15	666	>sp|P07911|UROM_HUMAN Uromodulin OS=Homo sapiens OX=9606 GN=UMOD PE=1 SV=1	1	20230315_zy_umod_tg-after.2780.2780.3	controllerType=0 controllerNumber=1 scan=2780	10.3996
E.C[+57.021]HSN[+3081.095]ATC[+57.021]TE.D	HexNAc(6)Hex(7)Fuc(1)NeuAc(2)	C[+57]*2, N[+3081]	1387.5	3	4160.49	4160.48	0	0.6	35	Specific	567.98	567.98	567.98	5.19	666	>sp|P07911|UROM_HUMAN Uromodulin OS=Homo sapiens OX=9606 GN=UMOD PE=1 SV=1	1	20230315_zy_umod_tg-after.2501.2501.3	controllerType=0 controllerNumber=1 scan=2501	9.3577
E.C[+57.021]HSN[+2715.963]ATC[+57.021]TEDE.A	HexNAc(5)Hex(6)Fuc(1)NeuAc(2)	C[+57]*2, N[+2716]	1347.15	3	4039.43	4039.42	0	1.9	35	Specific	732.97	732.97	732.97	9.02	666	>sp|P07911|UROM_HUMAN Uromodulin OS=Homo sapiens OX=9606 GN=UMOD PE=1 SV=1	1	20230315_zy_umod_tg-after.2825.2825.3	controllerType=0 controllerNumber=1 scan=2825	10.5592

## Sheet: Table S3.2
Supplementary Table S3.2. Site-specific N-glycosylation anlaysis of Umod (N80)
Peptide < ProteinMetrics Confidential >	Glycans NHFAGNa	Modification Type(s)	Observed m/z	z	Observed (M+H)	Calc. mass (M+H)	Off-by-x error	Mass error (ppm)	Starting position	Cleavage	Score	Delta	Delta Mod	|Log Prob|	# of unique peptides	Protein Name	Protein DB number	Comment	Scan #	Scan Time
E.C[+57.021]AIPGAHNC[+57.021]SAN[+2569.905]SSC[+57.021]VNTPGSFSC[+57.021]VC[+57.021]PE.G	HexNAc(5)Hex(6)NeuAc(2)	C[+57]*5, N[+2570]	1403.54	4	5611.13	5610.12	1	2.7	69	Specific	328.24	267.37	138.08	2.57	666	>sp|P07911|UROM_HUMAN Uromodulin OS=Homo sapiens OX=9606 GN=UMOD PE=1 SV=1	1	20230315_zy_umod_tg-after.14742.14742.4	controllerType=0 controllerNumber=1 scan=14742	53.2592
E.C[+57.021]AIPGAHNC[+57.021]SAN[+2586.920]SSC[+57.021]VNTPGSFSC[+57.021]VC[+57.021]PE.G	HexNAc(5)Hex(7)Fuc(1)NeuAc(1)	C[+57]*5, N[+2587]	1407.54	4	5627.12	5627.13	0	-1.4	69	Specific	244.75	244.75	92.48	2.78	666	>sp|P07911|UROM_HUMAN Uromodulin OS=Homo sapiens OX=9606 GN=UMOD PE=1 SV=1	1	20230315_zy_umod_tg-after.14739.14739.4	controllerType=0 controllerNumber=1 scan=14739	53.2442

## Sheet: Table S3.3
Supplementary Table S3.3. Site-specific N-glycosylation anlaysis of Umod (N232)
Peptide < ProteinMetrics Confidential >	Glycans NHFAGNa	Modification Type(s)	Observed m/z	z	Observed (M+H)	Calc. mass (M+H)	Off-by-x error	Mass error (ppm)	Starting position	Cleavage	Score	Delta	Delta Mod	|Log Prob|	# of unique peptides	Protein Name	Protein DB number	Comment	Scan #	Scan Time
E.TC[+57.021]VPVLRC[+57.021]NTAAPMWLN[+1589.571]GTHPSSDE.G	HexNAc(4)Hex(3)NeuAc(1)	C[+57]*2, N[+1590]	1101.47	4	4402.85	4402.85	0	-0.2	216	Specific	251.06	251.06	251.06	6.17	244	>sp|P07911|UROM_HUMAN Uromodulin OS=Homo sapiens OX=9606 GN=UMOD PE=1 SV=1	1	20230315_zy_umod_g-after.18334.18334.4	controllerType=0 controllerNumber=1 scan=18334	69.3329
E.TC[+57.021]VPVLRC[+57.021]NTAAPMWLN[+1589.571]GTHPSSDE.G	HexNAc(4)Hex(3)NeuAc(1)	C[+57]*2, N[+1590]	1468.29	3	4402.85	4402.85	0	0.2	216	Specific	352.12	352.12	352.12	6.16	244	>sp|P07911|UROM_HUMAN Uromodulin OS=Homo sapiens OX=9606 GN=UMOD PE=1 SV=1	1	20230315_zy_umod_g-after.18333.18333.4	controllerType=0 controllerNumber=1 scan=18333	69.33
E.TC[+57.021]VPVLRC[+57.021]NTAAPMWLN[+1622.582]GTHPSSDE.G	HexNAc(4)Hex(5)	C[+57]*2, N[+1623]	1479.29	3	4435.87	4435.86	0	0.8	216	Specific	204.7	204.7	159.82	5.94	244	>sp|P07911|UROM_HUMAN Uromodulin OS=Homo sapiens OX=9606 GN=UMOD PE=1 SV=1	1	20230315_zy_umod_g-after.17426.17426.3	controllerType=0 controllerNumber=1 scan=17426	65.9994
E.TC[+57.021]VPVLRC[+57.021]NTAAPMWLN[+1768.640]GTHPSSDE.G	HexNAc(4)Hex(5)Fuc(1)	C[+57]*2, N[+1769]	1527.98	3	4581.91	4581.92	0	-1.2	216	Specific	341.92	341.92	146.4	5.65	244	>sp|P07911|UROM_HUMAN Uromodulin OS=Homo sapiens OX=9606 GN=UMOD PE=1 SV=1	1	20230315_zy_umod_g-after.17205.17205.3	controllerType=0 controllerNumber=1 scan=17205	65.184
E.TC[+57.021]VPVLRC[+57.021]NTAAPM[+15.995]WLN[+2059.735]GTHPSSDE.G	HexNAc(4)Hex(5)Fuc(1)NeuAc(1)	C[+57]*2, M[+16], N[+2060]	1222.76	4	4888.01	4889.01	-1	1.4	216	Specific	213.29	213.29	55.73	6.15	244	>sp|P07911|UROM_HUMAN Uromodulin OS=Homo sapiens OX=9606 GN=UMOD PE=1 SV=1	1	20230315_zy_umod_g-after.16805.16805.4	controllerType=0 controllerNumber=1 scan=16805	63.7104
E.TC[+57.021]VPVLRC[+57.021]NTAAPM[+15.995]WLN[+2059.735]GTHPSSDE.G	HexNAc(4)Hex(5)Fuc(1)NeuAc(1)	C[+57]*2, M[+16], N[+2060]	1630.35	3	4889.04	4889.01	0	5.9	216	Specific	229.81	229.81	155.38	4.5	244	>sp|P07911|UROM_HUMAN Uromodulin OS=Homo sapiens OX=9606 GN=UMOD PE=1 SV=1	1	20230315_zy_umod_g-after.16796.16796.3	controllerType=0 controllerNumber=1 scan=16796	63.6766
E.TC[+57.021]VPVLRC[+57.021]NTAAPM[+15.995]WLN[+2059.735]GTHPSSDE.G	HexNAc(4)Hex(5)Fuc(1)NeuAc(1)	C[+57]*2, M[+16], N[+2060]	1223.01	4	4889.01	4889.01	0	0.2	216	Specific	264.66	264.66	78.13	6.58	244	>sp|P07911|UROM_HUMAN Uromodulin OS=Homo sapiens OX=9606 GN=UMOD PE=1 SV=1	1	20230315_zy_umod_g-after.16744.16744.4	controllerType=0 controllerNumber=1 scan=16744	63.4793
E.TC[+57.021]VPVLRC[+57.021]NTAAPM[+15.995]WLN[+2059.735]GTHPSSDE.G	HexNAc(4)Hex(5)Fuc(1)NeuAc(1)	C[+57]*2, M[+16], N[+2060]	1630.34	3	4889.01	4889.01	0	0.9	216	Specific	320.68	320.68	167.15	6.08	244	>sp|P07911|UROM_HUMAN Uromodulin OS=Homo sapiens OX=9606 GN=UMOD PE=1 SV=1	1	20230315_zy_umod_g-after.16656.16656.3	controllerType=0 controllerNumber=1 scan=16656	63.1595
E.TC[+57.021]VPVLRC[+57.021]NTAAPMWLN[+2059.735]GTHPSSDE.G	HexNAc(4)Hex(5)Fuc(1)NeuAc(1)	C[+57]*2, N[+2060]	1624.68	3	4872.03	4873.02	-1	3.3	216	Specific	322.97	322.97	322.97	5.13	244	>sp|P07911|UROM_HUMAN Uromodulin OS=Homo sapiens OX=9606 GN=UMOD PE=1 SV=1	1	20230315_zy_umod_g-after.18024.18024.3	controllerType=0 controllerNumber=1 scan=18024	68.2253
E.TC[+57.021]VPVLRC[+57.021]NTAAPM[+15.995]WLN[+2059.735]GTHPSSDE.G	HexNAc(4)Hex(5)Fuc(1)NeuAc(1)	C[+57]*2, M[+16], N[+2060]	1222.76	4	4888.02	4889.01	-1	2.4	216	Specific	389.52	389.52	206.53	6.91	244	>sp|P07911|UROM_HUMAN Uromodulin OS=Homo sapiens OX=9606 GN=UMOD PE=1 SV=1	1	20230315_zy_umod_g-after.16655.16655.4	controllerType=0 controllerNumber=1 scan=16655	63.1568
E.TC[+57.021]VPVLRC[+57.021]NTAAPMWLN[+2059.735]GTHPSSDE.G	HexNAc(4)Hex(5)Fuc(1)NeuAc(1)	C[+57]*2, N[+2060]	1219.01	4	4873.02	4873.02	0	0.9	216	Specific	408.72	408.72	408.72	7.78	244	>sp|P07911|UROM_HUMAN Uromodulin OS=Homo sapiens OX=9606 GN=UMOD PE=1 SV=1	1	20230315_zy_umod_g-after.18133.18133.4	controllerType=0 controllerNumber=1 scan=18133	68.6109
E.TC[+57.021]VPVLRC[+57.021]NTAAPMWLN[+2059.735]GTHPSSDE.G	HexNAc(4)Hex(5)Fuc(1)NeuAc(1)	C[+57]*2, N[+2060]	1624.68	3	4872.03	4873.02	-1	2.9	216	Specific	431.52	431.52	431.52	6.16	244	>sp|P07911|UROM_HUMAN Uromodulin OS=Homo sapiens OX=9606 GN=UMOD PE=1 SV=1	1	20230315_zy_umod_g-after.18134.18134.3	controllerType=0 controllerNumber=1 scan=18134	68.6131
E.TC[+57.021]VPVLRC[+57.021]NTAAPM[+15.995]WLN[+2059.735]GTHPSSDE.G	HexNAc(4)Hex(5)Fuc(1)NeuAc(1)	C[+57]*2, M[+16], N[+2060]	1223.01	4	4889.02	4889.01	0	1.8	216	Specific	447.32	447.32	163	7.81	244	>sp|P07911|UROM_HUMAN Uromodulin OS=Homo sapiens OX=9606 GN=UMOD PE=1 SV=1	1	20230315_zy_umod_g-after.16674.16674.4	controllerType=0 controllerNumber=1 scan=16674	63.2242
E.TC[+57.021]VPVLRC[+57.021]NTAAPM[+15.995]WLN[+2059.735]GTHPSSDE.G	HexNAc(4)Hex(5)Fuc(1)NeuAc(1)	C[+57]*2, M[+16], N[+2060]	1223.01	4	4889.01	4889.01	0	0.9	216	Specific	495.86	495.86	300.28	7.86	244	>sp|P07911|UROM_HUMAN Uromodulin OS=Homo sapiens OX=9606 GN=UMOD PE=1 SV=1	1	20230315_zy_umod_g-after.16711.16711.5	controllerType=0 controllerNumber=1 scan=16711	63.3649
E.TC[+57.021]VPVLRC[+57.021]NTAAPMWLN[+2059.735]GTHPSSDE.G	HexNAc(4)Hex(5)Fuc(1)NeuAc(1)	C[+57]*2, N[+2060]	1625.01	3	4873.01	4873.02	0	-0.5	216	Specific	644.17	644.17	644.17	8.71	244	>sp|P07911|UROM_HUMAN Uromodulin OS=Homo sapiens OX=9606 GN=UMOD PE=1 SV=1	1	20230315_zy_umod_g-after.18032.18032.3	controllerType=0 controllerNumber=1 scan=18032	68.2566
E.TC[+57.021]VPVLRC[+57.021]NTAAPMWLN[+2059.735]GTHPSSDE.G	HexNAc(4)Hex(5)Fuc(1)NeuAc(1)	C[+57]*2, N[+2060]	1219.01	4	4873.02	4873.02	0	0.7	216	Specific	714.99	714.99	714.99	11.75	244	>sp|P07911|UROM_HUMAN Uromodulin OS=Homo sapiens OX=9606 GN=UMOD PE=1 SV=1	1	20230315_zy_umod_g-after.18031.18031.4	controllerType=0 controllerNumber=1 scan=18031	68.2532
E.TC[+57.021]VPVLRC[+57.021]NTAAPM[+15.995]WLN[+2350.830]GTHPSSDE.G	HexNAc(4)Hex(5)Fuc(1)NeuAc(2)	C[+57]*2, M[+16], N[+2351]	1727.38	3	5180.12	5180.11	0	2	216	Specific	231.97	231.97	231.97	5.94	244	>sp|P07911|UROM_HUMAN Uromodulin OS=Homo sapiens OX=9606 GN=UMOD PE=1 SV=1	1	20230315_zy_umod_g-after.17765.17765.3	controllerType=0 controllerNumber=1 scan=17765	67.2812
E.TC[+57.021]VPVLRC[+57.021]NTAAPM[+15.995]WLN[+2350.830]GTHPSSDE.G	HexNAc(4)Hex(5)Fuc(1)NeuAc(2)	C[+57]*2, M[+16], N[+2351]	1295.78	4	5180.1	5180.11	0	-0.5	216	Specific	249.38	249.38	249.38	6.17	244	>sp|P07911|UROM_HUMAN Uromodulin OS=Homo sapiens OX=9606 GN=UMOD PE=1 SV=1	1	20230315_zy_umod_g-after.18298.18298.4	controllerType=0 controllerNumber=1 scan=18298	69.1993
E.TC[+57.021]VPVLRC[+57.021]NTAAPM[+15.995]WLN[+2350.830]GTHPSSDE.G	HexNAc(4)Hex(5)Fuc(1)NeuAc(2)	C[+57]*2, M[+16], N[+2351]	1295.78	4	5180.11	5180.11	0	1.2	216	Specific	250.29	250.29	250.29	6.54	244	>sp|P07911|UROM_HUMAN Uromodulin OS=Homo sapiens OX=9606 GN=UMOD PE=1 SV=1	1	20230315_zy_umod_g-after.17906.17906.4	controllerType=0 controllerNumber=1 scan=17906	67.7951
E.TC[+57.021]VPVLRC[+57.021]NTAAPMWLN[+2350.830]GTHPSSDE.G	HexNAc(4)Hex(5)Fuc(1)NeuAc(2)	C[+57]*2, N[+2351]	1291.78	4	5164.11	5164.11	0	-0.5	216	Specific	310.79	310.79	310.79	6.35	244	>sp|P07911|UROM_HUMAN Uromodulin OS=Homo sapiens OX=9606 GN=UMOD PE=1 SV=1	1	20230315_zy_umod_g-after.19146.19146.4	controllerType=0 controllerNumber=1 scan=19146	72.2947
E.TC[+57.021]VPVLRC[+57.021]NTAAPM[+15.995]WLN[+2350.830]GTHPSSDE.G	HexNAc(4)Hex(5)Fuc(1)NeuAc(2)	C[+57]*2, M[+16], N[+2351]	1727.38	3	5180.11	5180.11	0	1.4	216	Specific	325.05	325.05	325.05	6.08	244	>sp|P07911|UROM_HUMAN Uromodulin OS=Homo sapiens OX=9606 GN=UMOD PE=1 SV=1	1	20230315_zy_umod_g-after.17850.17850.3	controllerType=0 controllerNumber=1 scan=17850	67.5888
E.TC[+57.021]VPVLRC[+57.021]NTAAPMWLN[+2350.830]GTHPSSDE.G	HexNAc(4)Hex(5)Fuc(1)NeuAc(2)	C[+57]*2, N[+2351]	1033.43	5	5163.12	5164.11	-1	2.4	216	Specific	361.29	361.29	361.29	5.02	244	>sp|P07911|UROM_HUMAN Uromodulin OS=Homo sapiens OX=9606 GN=UMOD PE=1 SV=1	1	20230315_zy_umod_g-after.18672.18672.5	controllerType=0 controllerNumber=1 scan=18672	70.5609
E.TC[+57.021]VPVLRC[+57.021]NTAAPMWLN[+2350.830]GTHPSSDE.G	HexNAc(4)Hex(5)Fuc(1)NeuAc(2)	C[+57]*2, N[+2351]	1722.05	3	5164.12	5164.11	0	2.2	216	Specific	365.88	365.88	365.88	6.18	244	>sp|P07911|UROM_HUMAN Uromodulin OS=Homo sapiens OX=9606 GN=UMOD PE=1 SV=1	1	20230315_zy_umod_g-after.18648.18648.3	controllerType=0 controllerNumber=1 scan=18648	70.4813
E.TC[+57.021]VPVLRC[+57.021]NTAAPM[+15.995]WLN[+2350.830]GTHPSSDE.G	HexNAc(4)Hex(5)Fuc(1)NeuAc(2)	C[+57]*2, M[+16], N[+2351]	1295.78	4	5180.11	5180.11	0	0.9	216	Specific	443.08	443.08	443.08	7.81	244	>sp|P07911|UROM_HUMAN Uromodulin OS=Homo sapiens OX=9606 GN=UMOD PE=1 SV=1	1	20230315_zy_umod_g-after.17819.17819.4	controllerType=0 controllerNumber=1 scan=17819	67.4811
E.TC[+57.021]VPVLRC[+57.021]NTAAPM[+15.995]WLN[+2350.830]GTHPSSDE.G	HexNAc(4)Hex(5)Fuc(1)NeuAc(2)	C[+57]*2, M[+16], N[+2351]	1295.78	4	5180.11	5180.11	0	0.7	216	Specific	488.37	488.37	488.37	7.86	244	>sp|P07911|UROM_HUMAN Uromodulin OS=Homo sapiens OX=9606 GN=UMOD PE=1 SV=1	1	20230315_zy_umod_g-after.17783.17783.4	controllerType=0 controllerNumber=1 scan=17783	67.3418
E.TC[+57.021]VPVLRC[+57.021]NTAAPM[+15.995]WLN[+2350.830]GTHPSSDE.G	HexNAc(4)Hex(5)Fuc(1)NeuAc(2)	C[+57]*2, M[+16], N[+2351]	1295.78	4	5180.11	5180.11	0	0.7	216	Specific	495.38	495.38	495.38	7.86	244	>sp|P07911|UROM_HUMAN Uromodulin OS=Homo sapiens OX=9606 GN=UMOD PE=1 SV=1	1	20230315_zy_umod_g-after.17883.17883.4	controllerType=0 controllerNumber=1 scan=17883	67.7091
E.TC[+57.021]VPVLRC[+57.021]NTAAPM[+15.995]WLN[+2350.830]GTHPSSDE.G	HexNAc(4)Hex(5)Fuc(1)NeuAc(2)	C[+57]*2, M[+16], N[+2351]	1295.54	4	5179.12	5180.11	-1	3.7	216	Specific	528.54	528.54	528.54	6.71	244	>sp|P07911|UROM_HUMAN Uromodulin OS=Homo sapiens OX=9606 GN=UMOD PE=1 SV=1	1	20230315_zy_umod_g-after.17737.17737.4	controllerType=0 controllerNumber=1 scan=17737	67.177
E.TC[+57.021]VPVLRC[+57.021]NTAAPM[+15.995]WLN[+2350.830]GTHPSSDE.G	HexNAc(4)Hex(5)Fuc(1)NeuAc(2)	C[+57]*2, M[+16], N[+2351]	1295.78	4	5180.11	5180.11	0	0.8	216	Specific	540.54	540.54	540.54	8.09	244	>sp|P07911|UROM_HUMAN Uromodulin OS=Homo sapiens OX=9606 GN=UMOD PE=1 SV=1	1	20230315_zy_umod_g-after.18277.18277.4	controllerType=0 controllerNumber=1 scan=18277	69.1267
E.TC[+57.021]VPVLRC[+57.021]NTAAPMWLN[+2350.830]GTHPSSDE.G	HexNAc(4)Hex(5)Fuc(1)NeuAc(2)	C[+57]*2, N[+2351]	1291.78	4	5164.11	5164.11	0	-0.7	216	Specific	548.2	548.2	548.2	7.72	244	>sp|P07911|UROM_HUMAN Uromodulin OS=Homo sapiens OX=9606 GN=UMOD PE=1 SV=1	1	20230315_zy_umod_g-after.18731.18731.4	controllerType=0 controllerNumber=1 scan=18731	70.7717
E.TC[+57.021]VPVLRC[+57.021]NTAAPMWLN[+2350.830]GTHPSSDE.G	HexNAc(4)Hex(5)Fuc(1)NeuAc(2)	C[+57]*2, N[+2351]	1722.04	3	5164.12	5164.11	0	1.8	216	Specific	596.58	596.58	596.58	8.08	244	>sp|P07911|UROM_HUMAN Uromodulin OS=Homo sapiens OX=9606 GN=UMOD PE=1 SV=1	1	20230315_zy_umod_g-after.18667.18667.3	controllerType=0 controllerNumber=1 scan=18667	70.5506
E.TC[+57.021]VPVLRC[+57.021]NTAAPMWLN[+2350.830]GTHPSSDE.G	HexNAc(4)Hex(5)Fuc(1)NeuAc(2)	C[+57]*2, N[+2351]	1291.79	4	5164.12	5164.11	0	1.5	216	Specific	632.54	632.54	632.54	9.75	244	>sp|P07911|UROM_HUMAN Uromodulin OS=Homo sapiens OX=9606 GN=UMOD PE=1 SV=1	1	20230315_zy_umod_g-after.18666.18666.4	controllerType=0 controllerNumber=1 scan=18666	70.5483
E.TC[+57.021]VPVLRC[+57.021]NTAAPMWLN[+2350.830]GTHPSSDE.G	HexNAc(4)Hex(5)Fuc(1)NeuAc(2)	C[+57]*2, N[+2351]	1291.78	4	5164.12	5164.11	0	1	216	Specific	671.14	671.14	671.14	10.75	244	>sp|P07911|UROM_HUMAN Uromodulin OS=Homo sapiens OX=9606 GN=UMOD PE=1 SV=1	1	20230315_zy_umod_g-after.18616.18616.4	controllerType=0 controllerNumber=1 scan=18616	70.3634
E.TC[+57.021]VPVLRC[+57.021]NTAAPM[+15.995]WLN[+1913.677]GTHPSSDE.G	HexNAc(4)Hex(5)NeuAc(1)	C[+57]*2, M[+16], N[+1914]	1186.74	4	4743.93	4742.95	1	-5.6	216	Specific	204.53	204.53	204.53	5.54	244	>sp|P07911|UROM_HUMAN Uromodulin OS=Homo sapiens OX=9606 GN=UMOD PE=1 SV=1	1	20230315_zy_umod_g-after.18301.18301.4	controllerType=0 controllerNumber=1 scan=18301	69.2141
E.TC[+57.021]VPVLRC[+57.021]NTAAPM[+15.995]WLN[+1913.677]GTHPSSDE.G	HexNAc(4)Hex(5)NeuAc(1)	C[+57]*2, M[+16], N[+1914]	1186.74	4	4743.94	4742.95	1	-2.5	216	Specific	208.56	208.56	208.56	5.99	244	>sp|P07911|UROM_HUMAN Uromodulin OS=Homo sapiens OX=9606 GN=UMOD PE=1 SV=1	1	20230315_zy_umod_g-after.18294.18294.4	controllerType=0 controllerNumber=1 scan=18294	69.1854
E.TC[+57.021]VPVLRC[+57.021]NTAAPM[+15.995]WLN[+1913.677]GTHPSSDE.G	HexNAc(4)Hex(5)NeuAc(1)	C[+57]*2, M[+16], N[+1914]	1186.24	4	4741.95	4742.95	-1	0.4	216	Specific	218.06	218.06	218.06	6.15	244	>sp|P07911|UROM_HUMAN Uromodulin OS=Homo sapiens OX=9606 GN=UMOD PE=1 SV=1	1	20230315_zy_umod_g-after.17249.17249.4	controllerType=0 controllerNumber=1 scan=17249	65.3495
E.TC[+57.021]VPVLRC[+57.021]NTAAPM[+15.995]WLN[+1913.677]GTHPSSDE.G	HexNAc(4)Hex(5)NeuAc(1)	C[+57]*2, M[+16], N[+1914]	1581.99	3	4743.96	4742.95	1	0.5	216	Specific	228.18	228.18	208.18	5.94	244	>sp|P07911|UROM_HUMAN Uromodulin OS=Homo sapiens OX=9606 GN=UMOD PE=1 SV=1	1	20230315_zy_umod_g-after.17285.17285.3	controllerType=0 controllerNumber=1 scan=17285	65.4852
E.TC[+57.021]VPVLRC[+57.021]NTAAPM[+15.995]WLN[+1913.677]GTHPSSDE.G	HexNAc(4)Hex(5)NeuAc(1)	C[+57]*2, M[+16], N[+1914]	1186.49	4	4742.96	4742.95	0	1.1	216	Specific	279.35	279.35	95.56	6.58	244	>sp|P07911|UROM_HUMAN Uromodulin OS=Homo sapiens OX=9606 GN=UMOD PE=1 SV=1	1	20230315_zy_umod_g-after.17026.17026.4	controllerType=0 controllerNumber=1 scan=17026	64.5176
E.TC[+57.021]VPVLRC[+57.021]NTAAPM[+15.995]WLN[+1913.677]GTHPSSDE.G	HexNAc(4)Hex(5)NeuAc(1)	C[+57]*2, M[+16], N[+1914]	1581.66	3	4742.95	4742.95	0	0.4	216	Specific	331.97	331.97	235.02	6.08	244	>sp|P07911|UROM_HUMAN Uromodulin OS=Homo sapiens OX=9606 GN=UMOD PE=1 SV=1	1	20230315_zy_umod_g-after.17119.17119.3	controllerType=0 controllerNumber=1 scan=17119	64.8659
E.TC[+57.021]VPVLRC[+57.021]NTAAPM[+15.995]WLN[+1913.677]GTHPSSDE.G	HexNAc(4)Hex(5)NeuAc(1)	C[+57]*2, M[+16], N[+1914]	1186.24	4	4741.95	4742.95	-1	1.1	216	Specific	368.17	368.17	368.17	6.39	244	>sp|P07911|UROM_HUMAN Uromodulin OS=Homo sapiens OX=9606 GN=UMOD PE=1 SV=1	1	20230315_zy_umod_g-after.17133.17133.4	controllerType=0 controllerNumber=1 scan=17133	64.9169
E.TC[+57.021]VPVLRC[+57.021]NTAAPM[+15.995]WLN[+1913.677]GTHPSSDE.G	HexNAc(4)Hex(5)NeuAc(1)	C[+57]*2, M[+16], N[+1914]	1186.49	4	4742.96	4742.95	0	1.3	216	Specific	378.99	378.99	285.32	7.86	244	>sp|P07911|UROM_HUMAN Uromodulin OS=Homo sapiens OX=9606 GN=UMOD PE=1 SV=1	1	20230315_zy_umod_g-after.17048.17048.4	controllerType=0 controllerNumber=1 scan=17048	64.6004
E.TC[+57.021]VPVLRC[+57.021]NTAAPM[+15.995]WLN[+1913.677]GTHPSSDE.G	HexNAc(4)Hex(5)NeuAc(1)	C[+57]*2, M[+16], N[+1914]	1581.66	3	4742.95	4742.95	0	0	216	Specific	389.75	389.75	267.06	7.19	244	>sp|P07911|UROM_HUMAN Uromodulin OS=Homo sapiens OX=9606 GN=UMOD PE=1 SV=1	1	20230315_zy_umod_g-after.17035.17035.3	controllerType=0 controllerNumber=1 scan=17035	64.5527
E.TC[+57.021]VPVLRC[+57.021]NTAAPMWLN[+1913.677]GTHPSSDE.G	HexNAc(4)Hex(5)NeuAc(1)	C[+57]*2, N[+1914]	1182.5	4	4726.96	4726.96	0	1.1	216	Specific	519.89	519.89	204.71	7.86	244	>sp|P07911|UROM_HUMAN Uromodulin OS=Homo sapiens OX=9606 GN=UMOD PE=1 SV=1	1	20230315_zy_umod_g-after.18154.18154.4	controllerType=0 controllerNumber=1 scan=18154	68.6828
E.TC[+57.021]VPVLRC[+57.021]NTAAPMWLN[+1913.677]GTHPSSDE.G	HexNAc(4)Hex(5)NeuAc(1)	C[+57]*2, N[+1914]	1576.33	3	4726.97	4726.96	0	1.8	216	Specific	595.24	595.24	306.09	8.08	244	>sp|P07911|UROM_HUMAN Uromodulin OS=Homo sapiens OX=9606 GN=UMOD PE=1 SV=1	1	20230315_zy_umod_g-after.18161.18161.3	controllerType=0 controllerNumber=1 scan=18161	68.7113
E.TC[+57.021]VPVLRC[+57.021]NTAAPMWLN[+1913.677]GTHPSSDE.G	HexNAc(4)Hex(5)NeuAc(1)	C[+57]*2, N[+1914]	1182.5	4	4726.96	4726.96	0	0.7	216	Specific	684.73	684.73	246.35	10.75	244	>sp|P07911|UROM_HUMAN Uromodulin OS=Homo sapiens OX=9606 GN=UMOD PE=1 SV=1	1	20230315_zy_umod_g-after.18168.18168.4	controllerType=0 controllerNumber=1 scan=18168	68.7328
E.TC[+57.021]VPVLRC[+57.021]NTAAPMWLN[+1913.677]GTHPSSDE.G	HexNAc(4)Hex(5)NeuAc(1)	C[+57]*2, N[+1914]	1182.5	4	4726.96	4726.96	0	0.6	216	Specific	687.05	687.05	427.67	10.75	244	>sp|P07911|UROM_HUMAN Uromodulin OS=Homo sapiens OX=9606 GN=UMOD PE=1 SV=1	1	20230315_zy_umod_g-after.18162.18162.4	controllerType=0 controllerNumber=1 scan=18162	68.7147
E.TC[+57.021]VPVLRC[+57.021]NTAAPMWLN[+2204.772]GTHPSSDE.G	HexNAc(4)Hex(5)NeuAc(2)	C[+57]*2, N[+2205]	1255.52	4	5019.07	5018.05	1	2.6	216	Specific	219.11	219.11	86.05	6.12	244	>sp|P07911|UROM_HUMAN Uromodulin OS=Homo sapiens OX=9606 GN=UMOD PE=1 SV=1	1	20230315_zy_umod_g-after.18550.18550.4	controllerType=0 controllerNumber=1 scan=18550	70.1274
E.TC[+57.021]VPVLRC[+57.021]NTAAPM[+15.995]WLN[+2204.772]GTHPSSDE.G	HexNAc(4)Hex(5)NeuAc(2)	C[+57]*2, M[+16], N[+2205]	1259.02	4	5033.05	5034.05	-1	1.3	216	Specific	278.79	278.79	278.79	6.12	244	>sp|P07911|UROM_HUMAN Uromodulin OS=Homo sapiens OX=9606 GN=UMOD PE=1 SV=1	1	20230315_zy_umod_g-after.18514.18514.4	controllerType=0 controllerNumber=1 scan=18514	69.9972
E.TC[+57.021]VPVLRC[+57.021]NTAAPMWLN[+2204.772]GTHPSSDE.G	HexNAc(4)Hex(5)NeuAc(2)	C[+57]*2, N[+2205]	1673.02	3	5017.05	5018.05	-1	0.2	216	Specific	332.96	332.96	332.96	5.62	244	>sp|P07911|UROM_HUMAN Uromodulin OS=Homo sapiens OX=9606 GN=UMOD PE=1 SV=1	1	20230315_zy_umod_g-after.18757.18757.3	controllerType=0 controllerNumber=1 scan=18757	70.8694
E.TC[+57.021]VPVLRC[+57.021]NTAAPM[+15.995]WLN[+2204.772]GTHPSSDE.G	HexNAc(4)Hex(5)NeuAc(2)	C[+57]*2, M[+16], N[+2205]	1259.02	4	5033.05	5034.05	-1	2	216	Specific	346.85	346.85	346.85	6.37	244	>sp|P07911|UROM_HUMAN Uromodulin OS=Homo sapiens OX=9606 GN=UMOD PE=1 SV=1	1	20230315_zy_umod_g-after.17967.17967.4	controllerType=0 controllerNumber=1 scan=17967	68.0205
E.TC[+57.021]VPVLRC[+57.021]NTAAPM[+15.995]WLN[+2204.772]GTHPSSDE.G	HexNAc(4)Hex(5)NeuAc(2)	C[+57]*2, M[+16], N[+2205]	1259.27	4	5034.04	5034.05	0	-1.4	216	Specific	389.6	389.6	234.2	7.43	244	>sp|P07911|UROM_HUMAN Uromodulin OS=Homo sapiens OX=9606 GN=UMOD PE=1 SV=1	1	20230315_zy_umod_g-after.18419.18419.4	controllerType=0 controllerNumber=1 scan=18419	69.6439
E.TC[+57.021]VPVLRC[+57.021]NTAAPM[+15.995]WLN[+2204.772]GTHPSSDE.G	HexNAc(4)Hex(5)NeuAc(2)	C[+57]*2, M[+16], N[+2205]	1678.69	3	5034.05	5034.05	0	0.2	216	Specific	405.63	405.63	209.17	7.11	244	>sp|P07911|UROM_HUMAN Uromodulin OS=Homo sapiens OX=9606 GN=UMOD PE=1 SV=1	1	20230315_zy_umod_g-after.18002.18002.3	controllerType=0 controllerNumber=1 scan=18002	68.1487
E.TC[+57.021]VPVLRC[+57.021]NTAAPMWLN[+2204.772]GTHPSSDE.G	HexNAc(4)Hex(5)NeuAc(2)	C[+57]*2, N[+2205]	1004.22	5	5017.05	5018.05	-1	0.5	216	Specific	420.08	420.08	420.08	6.43	244	>sp|P07911|UROM_HUMAN Uromodulin OS=Homo sapiens OX=9606 GN=UMOD PE=1 SV=1	1	20230315_zy_umod_g-after.18785.18785.5	controllerType=0 controllerNumber=1 scan=18785	70.9718
E.TC[+57.021]VPVLRC[+57.021]NTAAPM[+15.995]WLN[+2204.772]GTHPSSDE.G	HexNAc(4)Hex(5)NeuAc(2)	C[+57]*2, M[+16], N[+2205]	1259.27	4	5034.05	5034.05	0	0.4	216	Specific	503.79	503.79	289.25	7.86	244	>sp|P07911|UROM_HUMAN Uromodulin OS=Homo sapiens OX=9606 GN=UMOD PE=1 SV=1	1	20230315_zy_umod_g-after.17988.17988.4	controllerType=0 controllerNumber=1 scan=17988	68.0978
E.TC[+57.021]VPVLRC[+57.021]NTAAPMWLN[+2204.772]GTHPSSDE.G	HexNAc(4)Hex(5)NeuAc(2)	C[+57]*2, N[+2205]	1255.27	4	5018.06	5018.05	0	1.3	216	Specific	508.81	508.81	508.81	7.86	244	>sp|P07911|UROM_HUMAN Uromodulin OS=Homo sapiens OX=9606 GN=UMOD PE=1 SV=1	1	20230315_zy_umod_g-after.18763.18763.4	controllerType=0 controllerNumber=1 scan=18763	70.8911
E.TC[+57.021]VPVLRC[+57.021]NTAAPMWLN[+2204.772]GTHPSSDE.G	HexNAc(4)Hex(5)NeuAc(2)	C[+57]*2, N[+2205]	1673.36	3	5018.06	5018.05	0	1.5	216	Specific	567.66	567.66	567.66	8.08	244	>sp|P07911|UROM_HUMAN Uromodulin OS=Homo sapiens OX=9606 GN=UMOD PE=1 SV=1	1	20230315_zy_umod_g-after.18838.18838.3	controllerType=0 controllerNumber=1 scan=18838	71.1674
E.TC[+57.021]VPVLRC[+57.021]NTAAPM[+15.995]WLN[+2204.772]GTHPSSDE.G	HexNAc(4)Hex(5)NeuAc(2)	C[+57]*2, M[+16], N[+2205]	1259.27	4	5034.05	5034.05	0	1	216	Specific	575.94	575.94	166.51	8.75	244	>sp|P07911|UROM_HUMAN Uromodulin OS=Homo sapiens OX=9606 GN=UMOD PE=1 SV=1	1	20230315_zy_umod_g-after.17994.17994.4	controllerType=0 controllerNumber=1 scan=17994	68.1132
E.TC[+57.021]VPVLRC[+57.021]NTAAPMWLN[+2204.772]GTHPSSDE.G	HexNAc(4)Hex(5)NeuAc(2)	C[+57]*2, N[+2205]	1255.27	4	5018.06	5018.05	0	1.4	216	Specific	576.68	576.68	576.68	8.75	244	>sp|P07911|UROM_HUMAN Uromodulin OS=Homo sapiens OX=9606 GN=UMOD PE=1 SV=1	1	20230315_zy_umod_g-after.18844.18844.4	controllerType=0 controllerNumber=1 scan=18844	71.1838
E.TC[+57.021]VPVLRC[+57.021]NTAAPMWLN[+2204.772]GTHPSSDE.G	HexNAc(4)Hex(5)NeuAc(2)	C[+57]*2, N[+2205]	1255.27	4	5018.06	5018.05	0	1.2	216	Specific	593.21	593.21	593.21	8.75	244	>sp|P07911|UROM_HUMAN Uromodulin OS=Homo sapiens OX=9606 GN=UMOD PE=1 SV=1	1	20230315_zy_umod_g-after.18782.18782.4	controllerType=0 controllerNumber=1 scan=18782	70.9632
E.TC[+57.021]VPVLRC[+57.021]NTAAPM[+15.995]WLN[+1784.634]GTHPSSDE.G	HexNAc(4)Hex(6)	C[+57]*2, M[+16], N[+1785]	1538.63	3	4613.88	4613.91	0	-6	216	Specific	291.81	291.81	291.81	4.98	244	>sp|P07911|UROM_HUMAN Uromodulin OS=Homo sapiens OX=9606 GN=UMOD PE=1 SV=1	1	20230315_zy_umod_g-after.17508.17508.3	controllerType=0 controllerNumber=1 scan=17508	66.3016
E.TC[+57.021]VPVLRC[+57.021]NTAAPM[+15.995]WLN[+2221.788]GTHPSSDE.G	HexNAc(4)Hex(6)Fuc(1)NeuAc(1)	C[+57]*2, M[+16], N[+2222]	1263.52	4	5051.07	5051.06	0	2.2	216	Specific	308.16	308.16	54	6.72	244	>sp|P07911|UROM_HUMAN Uromodulin OS=Homo sapiens OX=9606 GN=UMOD PE=1 SV=1	1	20230315_zy_umod_g-after.18055.18055.4	controllerType=0 controllerNumber=1 scan=18055	68.3342
E.TC[+57.021]VPVLRC[+57.021]NTAAPM[+15.995]WLN[+2221.788]GTHPSSDE.G	HexNAc(4)Hex(6)Fuc(1)NeuAc(1)	C[+57]*2, M[+16], N[+2222]	1263.27	4	5050.04	5051.06	-1	-3.3	216	Specific	357.4	357.4	86.14	5.75	244	>sp|P07911|UROM_HUMAN Uromodulin OS=Homo sapiens OX=9606 GN=UMOD PE=1 SV=1	1	20230315_zy_umod_g-after.18085.18085.4	controllerType=0 controllerNumber=1 scan=18085	68.433
E.TC[+57.021]VPVLRC[+57.021]NTAAPMWLN[+2075.730]GTHPSSDE.G	HexNAc(4)Hex(6)NeuAc(1)	C[+57]*2, N[+2076]	1630.33	3	4888.98	4889.01	0	-5.8	216	Specific	397.15	397.15	185.63	6.12	244	>sp|P07911|UROM_HUMAN Uromodulin OS=Homo sapiens OX=9606 GN=UMOD PE=1 SV=1	1	20230315_zy_umod_g-after.19021.19021.3	controllerType=0 controllerNumber=1 scan=19021	71.8365
E.TC[+57.021]VPVLRC[+57.021]NTAAPMWLN[+1663.608]GTHPSSDE.G	HexNAc(5)Hex(4)	C[+57]*2, N[+1664]	1492.96	3	4476.87	4476.89	0	-3.3	216	Specific	220.48	220.48	101.08	5.32	244	>sp|P07911|UROM_HUMAN Uromodulin OS=Homo sapiens OX=9606 GN=UMOD PE=1 SV=1	1	20230315_zy_umod_g-after.17445.17445.3	controllerType=0 controllerNumber=1 scan=17445	66.0649
E.TC[+57.021]VPVLRC[+57.021]NTAAPM[+15.995]WLN[+1663.608]GTHPSSDE.G	HexNAc(5)Hex(4)	C[+57]*2, M[+16], N[+1664]	1123.98	4	4492.89	4492.88	0	0.9	216	Specific	241.66	241.66	241.66	6.54	244	>sp|P07911|UROM_HUMAN Uromodulin OS=Homo sapiens OX=9606 GN=UMOD PE=1 SV=1	1	20230315_zy_umod_g-after.15602.15602.4	controllerType=0 controllerNumber=1 scan=15602	59.1996
E.TC[+57.021]VPVLRC[+57.021]NTAAPMWLN[+1663.608]GTHPSSDE.G	HexNAc(5)Hex(4)	C[+57]*2, N[+1664]	1492.96	3	4476.87	4476.89	0	-3.3	216	Specific	251.88	251.88	142.84	5.25	244	>sp|P07911|UROM_HUMAN Uromodulin OS=Homo sapiens OX=9606 GN=UMOD PE=1 SV=1	1	20230315_zy_umod_g-after.17406.17406.4	controllerType=0 controllerNumber=1 scan=17406	65.928
E.TC[+57.021]VPVLRC[+57.021]NTAAPMWLN[+1663.608]GTHPSSDE.G	HexNAc(5)Hex(4)	C[+57]*2, N[+1664]	1119.98	4	4476.9	4476.89	0	2.3	216	Specific	339.78	339.78	297.89	6.75	244	>sp|P07911|UROM_HUMAN Uromodulin OS=Homo sapiens OX=9606 GN=UMOD PE=1 SV=1	1	20230315_zy_umod_g-after.17424.17424.4	controllerType=0 controllerNumber=1 scan=17424	65.9936
E.TC[+57.021]VPVLRC[+57.021]NTAAPMWLN[+1663.608]GTHPSSDE.G	HexNAc(5)Hex(4)	C[+57]*2, N[+1664]	1492.97	3	4476.89	4476.89	0	-0.3	216	Specific	411.99	411.99	244.39	6.74	244	>sp|P07911|UROM_HUMAN Uromodulin OS=Homo sapiens OX=9606 GN=UMOD PE=1 SV=1	1	20230315_zy_umod_g-after.17423.17423.3	controllerType=0 controllerNumber=1 scan=17423	65.9902
E.TC[+57.021]VPVLRC[+57.021]NTAAPM[+15.995]WLN[+1809.666]GTHPSSDE.G	HexNAc(5)Hex(4)Fuc(1)	C[+57]*2, M[+16], N[+1810]	1160.74	4	4639.95	4638.94	1	0.9	216	Specific	201.14	201.14	151.28	6.52	244	>sp|P07911|UROM_HUMAN Uromodulin OS=Homo sapiens OX=9606 GN=UMOD PE=1 SV=1	1	20230315_zy_umod_g-after.15278.15278.4	controllerType=0 controllerNumber=1 scan=15278	58.0073
E.TC[+57.021]VPVLRC[+57.021]NTAAPMWLN[+1809.666]GTHPSSDE.G	HexNAc(5)Hex(4)Fuc(1)	C[+57]*2, N[+1810]	1156.49	4	4622.95	4622.95	0	1.1	216	Specific	226.93	226.93	226.93	6.61	244	>sp|P07911|UROM_HUMAN Uromodulin OS=Homo sapiens OX=9606 GN=UMOD PE=1 SV=1	1	20230315_zy_umod_g-after.17237.17237.4	controllerType=0 controllerNumber=1 scan=17237	65.3079
E.TC[+57.021]VPVLRC[+57.021]NTAAPM[+15.995]WLN[+2100.761]GTHPSSDE.G	HexNAc(5)Hex(4)Fuc(1)NeuAc(1)	C[+57]*2, M[+16], N[+2101]	1233.52	4	4931.05	4930.04	1	1.2	216	Specific	215.18	215.18	172.08	6.61	244	>sp|P07911|UROM_HUMAN Uromodulin OS=Homo sapiens OX=9606 GN=UMOD PE=1 SV=1	1	20230315_zy_umod_g-after.17105.17105.4	controllerType=0 controllerNumber=1 scan=17105	64.8124
E.TC[+57.021]VPVLRC[+57.021]NTAAPM[+15.995]WLN[+2100.761]GTHPSSDE.G	HexNAc(5)Hex(4)Fuc(1)NeuAc(1)	C[+57]*2, M[+16], N[+2101]	1233.27	4	4930.04	4930.04	0	1.4	216	Specific	225.25	225.25	44.77	6.61	244	>sp|P07911|UROM_HUMAN Uromodulin OS=Homo sapiens OX=9606 GN=UMOD PE=1 SV=1	1	20230315_zy_umod_g-after.16728.16728.4	controllerType=0 controllerNumber=1 scan=16728	63.4235
E.TC[+57.021]VPVLRC[+57.021]NTAAPM[+15.995]WLN[+2100.761]GTHPSSDE.G	HexNAc(5)Hex(4)Fuc(1)NeuAc(1)	C[+57]*2, M[+16], N[+2101]	1233.51	4	4931.04	4930.04	1	-0.5	216	Specific	228.29	228.29	174.16	6.24	244	>sp|P07911|UROM_HUMAN Uromodulin OS=Homo sapiens OX=9606 GN=UMOD PE=1 SV=1	1	20230315_zy_umod_g-after.17121.17121.4	controllerType=0 controllerNumber=1 scan=17121	64.8717
E.TC[+57.021]VPVLRC[+57.021]NTAAPM[+15.995]WLN[+2100.761]GTHPSSDE.G	HexNAc(5)Hex(4)Fuc(1)NeuAc(1)	C[+57]*2, M[+16], N[+2101]	1644.01	3	4930.03	4930.04	0	-2.1	216	Specific	238.09	238.09	182.8	5.49	244	>sp|P07911|UROM_HUMAN Uromodulin OS=Homo sapiens OX=9606 GN=UMOD PE=1 SV=1	1	20230315_zy_umod_g-after.17077.17077.3	controllerType=0 controllerNumber=1 scan=17077	64.7079
E.TC[+57.021]VPVLRC[+57.021]NTAAPMWLN[+2100.761]GTHPSSDE.G	HexNAc(5)Hex(4)Fuc(1)NeuAc(1)	C[+57]*2, N[+2101]	1229.26	4	4914.04	4914.04	0	-1	216	Specific	243.27	243.27	243.27	6.17	244	>sp|P07911|UROM_HUMAN Uromodulin OS=Homo sapiens OX=9606 GN=UMOD PE=1 SV=1	1	20230315_zy_umod_g-after.18768.18768.4	controllerType=0 controllerNumber=1 scan=18768	70.9119
E.TC[+57.021]VPVLRC[+57.021]NTAAPM[+15.995]WLN[+2100.761]GTHPSSDE.G	HexNAc(5)Hex(4)Fuc(1)NeuAc(1)	C[+57]*2, M[+16], N[+2101]	1233.26	4	4930.04	4930.04	0	0	216	Specific	275.19	275.19	61.95	6.58	244	>sp|P07911|UROM_HUMAN Uromodulin OS=Homo sapiens OX=9606 GN=UMOD PE=1 SV=1	1	20230315_zy_umod_g-after.16844.16844.4	controllerType=0 controllerNumber=1 scan=16844	63.8486
E.TC[+57.021]VPVLRC[+57.021]NTAAPM[+15.995]WLN[+2100.761]GTHPSSDE.G	HexNAc(5)Hex(4)Fuc(1)NeuAc(1)	C[+57]*2, M[+16], N[+2101]	1644.01	3	4930.01	4930.04	0	-5	216	Specific	303.4	303.4	201.48	4.98	244	>sp|P07911|UROM_HUMAN Uromodulin OS=Homo sapiens OX=9606 GN=UMOD PE=1 SV=1	1	20230315_zy_umod_g-after.17560.17560.3	controllerType=0 controllerNumber=1 scan=17560	66.4984
E.TC[+57.021]VPVLRC[+57.021]NTAAPM[+15.995]WLN[+2100.761]GTHPSSDE.G	HexNAc(5)Hex(4)Fuc(1)NeuAc(1)	C[+57]*2, M[+16], N[+2101]	1233.52	4	4931.05	4930.04	1	2.9	216	Specific	339.71	339.71	149.14	6.27	244	>sp|P07911|UROM_HUMAN Uromodulin OS=Homo sapiens OX=9606 GN=UMOD PE=1 SV=1	1	20230315_zy_umod_g-after.18078.18078.4	controllerType=0 controllerNumber=1 scan=18078	68.411
E.TC[+57.021]VPVLRC[+57.021]NTAAPMWLN[+2100.761]GTHPSSDE.G	HexNAc(5)Hex(4)Fuc(1)NeuAc(1)	C[+57]*2, N[+2101]	1229.27	4	4914.05	4914.04	0	1.4	216	Specific	353.08	353.08	353.08	6.83	244	>sp|P07911|UROM_HUMAN Uromodulin OS=Homo sapiens OX=9606 GN=UMOD PE=1 SV=1	1	20230315_zy_umod_g-after.18183.18183.4	controllerType=0 controllerNumber=1 scan=18183	68.7841
E.TC[+57.021]VPVLRC[+57.021]NTAAPM[+15.995]WLN[+2100.761]GTHPSSDE.G	HexNAc(5)Hex(4)Fuc(1)NeuAc(1)	C[+57]*2, M[+16], N[+2101]	1233.02	4	4929.05	4930.04	-1	2.7	216	Specific	377.65	377.65	253.7	6.91	244	>sp|P07911|UROM_HUMAN Uromodulin OS=Homo sapiens OX=9606 GN=UMOD PE=1 SV=1	1	20230315_zy_umod_g-after.17548.17548.4	controllerType=0 controllerNumber=1 scan=17548	66.4506
E.TC[+57.021]VPVLRC[+57.021]NTAAPM[+15.995]WLN[+2100.761]GTHPSSDE.G	HexNAc(5)Hex(4)Fuc(1)NeuAc(1)	C[+57]*2, M[+16], N[+2101]	1644.02	3	4930.04	4930.04	0	1.5	216	Specific	408.96	408.96	176.43	7.11	244	>sp|P07911|UROM_HUMAN Uromodulin OS=Homo sapiens OX=9606 GN=UMOD PE=1 SV=1	1	20230315_zy_umod_g-after.16657.16657.3	controllerType=0 controllerNumber=1 scan=16657	63.1625
E.TC[+57.021]VPVLRC[+57.021]NTAAPM[+15.995]WLN[+2100.761]GTHPSSDE.G	HexNAc(5)Hex(4)Fuc(1)NeuAc(1)	C[+57]*2, M[+16], N[+2101]	1644.02	3	4930.04	4930.04	0	0.8	216	Specific	441.97	441.97	192.67	7.14	244	>sp|P07911|UROM_HUMAN Uromodulin OS=Homo sapiens OX=9606 GN=UMOD PE=1 SV=1	1	20230315_zy_umod_g-after.16644.16644.3	controllerType=0 controllerNumber=1 scan=16644	63.1139
E.TC[+57.021]VPVLRC[+57.021]NTAAPM[+15.995]WLN[+2100.761]GTHPSSDE.G	HexNAc(5)Hex(4)Fuc(1)NeuAc(1)	C[+57]*2, M[+16], N[+2101]	1233.27	4	4930.05	4930.04	0	2.1	216	Specific	506.84	506.84	323.45	7.86	244	>sp|P07911|UROM_HUMAN Uromodulin OS=Homo sapiens OX=9606 GN=UMOD PE=1 SV=1	1	20230315_zy_umod_g-after.16738.16738.4	controllerType=0 controllerNumber=1 scan=16738	63.4633
E.TC[+57.021]VPVLRC[+57.021]NTAAPM[+15.995]WLN[+2100.761]GTHPSSDE.G	HexNAc(5)Hex(4)Fuc(1)NeuAc(1)	C[+57]*2, M[+16], N[+2101]	1644.02	3	4930.04	4930.04	0	1.6	216	Specific	522.75	522.75	212.17	7.42	244	>sp|P07911|UROM_HUMAN Uromodulin OS=Homo sapiens OX=9606 GN=UMOD PE=1 SV=1	1	20230315_zy_umod_g-after.16739.16739.3	controllerType=0 controllerNumber=1 scan=16739	63.4655
E.TC[+57.021]VPVLRC[+57.021]NTAAPMWLN[+2100.761]GTHPSSDE.G	HexNAc(5)Hex(4)Fuc(1)NeuAc(1)	C[+57]*2, N[+2101]	1229.27	4	4914.05	4914.04	0	1.1	216	Specific	538.6	538.6	538.6	8.09	244	>sp|P07911|UROM_HUMAN Uromodulin OS=Homo sapiens OX=9606 GN=UMOD PE=1 SV=1	1	20230315_zy_umod_g-after.18060.18060.4	controllerType=0 controllerNumber=1 scan=18060	68.354
E.TC[+57.021]VPVLRC[+57.021]NTAAPM[+15.995]WLN[+2100.761]GTHPSSDE.G	HexNAc(5)Hex(4)Fuc(1)NeuAc(1)	C[+57]*2, M[+16], N[+2101]	1233.27	4	4930.04	4930.04	0	1.3	216	Specific	541.43	541.43	203.42	8.09	244	>sp|P07911|UROM_HUMAN Uromodulin OS=Homo sapiens OX=9606 GN=UMOD PE=1 SV=1	1	20230315_zy_umod_g-after.16647.16647.4	controllerType=0 controllerNumber=1 scan=16647	63.1213
E.TC[+57.021]VPVLRC[+57.021]NTAAPM[+15.995]WLN[+2100.761]GTHPSSDE.G	HexNAc(5)Hex(4)Fuc(1)NeuAc(1)	C[+57]*2, M[+16], N[+2101]	1233.27	4	4930.04	4930.04	0	0.5	216	Specific	555.74	555.74	182.08	8.09	244	>sp|P07911|UROM_HUMAN Uromodulin OS=Homo sapiens OX=9606 GN=UMOD PE=1 SV=1	1	20230315_zy_umod_g-after.16730.16730.4	controllerType=0 controllerNumber=1 scan=16730	63.428
E.TC[+57.021]VPVLRC[+57.021]NTAAPM[+15.995]WLN[+2100.761]GTHPSSDE.G	HexNAc(5)Hex(4)Fuc(1)NeuAc(1)	C[+57]*2, M[+16], N[+2101]	1233.27	4	4930.04	4930.04	0	1.1	216	Specific	567.9	567.9	312.53	8.75	244	>sp|P07911|UROM_HUMAN Uromodulin OS=Homo sapiens OX=9606 GN=UMOD PE=1 SV=1	1	20230315_zy_umod_g-after.16654.16654.4	controllerType=0 controllerNumber=1 scan=16654	63.1534
E.TC[+57.021]VPVLRC[+57.021]NTAAPMWLN[+2100.761]GTHPSSDE.G	HexNAc(5)Hex(4)Fuc(1)NeuAc(1)	C[+57]*2, N[+2101]	1638.69	3	4914.05	4914.04	0	1.3	216	Specific	574.67	574.67	574.67	8.08	244	>sp|P07911|UROM_HUMAN Uromodulin OS=Homo sapiens OX=9606 GN=UMOD PE=1 SV=1	1	20230315_zy_umod_g-after.18061.18061.3	controllerType=0 controllerNumber=1 scan=18061	68.3563
E.TC[+57.021]VPVLRC[+57.021]NTAAPMWLN[+2100.761]GTHPSSDE.G	HexNAc(5)Hex(4)Fuc(1)NeuAc(1)	C[+57]*2, N[+2101]	1229.27	4	4914.05	4914.04	0	1.7	216	Specific	687.77	687.77	687.77	10.75	244	>sp|P07911|UROM_HUMAN Uromodulin OS=Homo sapiens OX=9606 GN=UMOD PE=1 SV=1	1	20230315_zy_umod_g-after.18052.18052.4	controllerType=0 controllerNumber=1 scan=18052	68.3211
E.TC[+57.021]VPVLRC[+57.021]NTAAPM[+15.995]WLN[+2391.857]GTHPSSDE.G	HexNAc(5)Hex(4)Fuc(1)NeuAc(2)	C[+57]*2, M[+16], N[+2392]	1741.05	3	5221.14	5221.13	0	1.1	216	Specific	210.42	210.42	68.7	5.94	244	>sp|P07911|UROM_HUMAN Uromodulin OS=Homo sapiens OX=9606 GN=UMOD PE=1 SV=1	1	20230315_zy_umod_g-after.17814.17814.3	controllerType=0 controllerNumber=1 scan=17814	67.4601
E.TC[+57.021]VPVLRC[+57.021]NTAAPMWLN[+2391.857]GTHPSSDE.G	HexNAc(5)Hex(4)Fuc(1)NeuAc(2)	C[+57]*2, N[+2392]	1302.04	4	5205.13	5205.14	0	-2.2	216	Specific	231.57	231.57	231.57	6.18	244	>sp|P07911|UROM_HUMAN Uromodulin OS=Homo sapiens OX=9606 GN=UMOD PE=1 SV=1	1	20230315_zy_umod_g-after.19119.19119.4	controllerType=0 controllerNumber=1 scan=19119	72.1961
E.TC[+57.021]VPVLRC[+57.021]NTAAPMWLN[+2391.857]GTHPSSDE.G	HexNAc(5)Hex(4)Fuc(1)NeuAc(2)	C[+57]*2, N[+2392]	1735.72	3	5205.13	5205.14	0	-0.8	216	Specific	251.34	251.34	251.34	5.5	244	>sp|P07911|UROM_HUMAN Uromodulin OS=Homo sapiens OX=9606 GN=UMOD PE=1 SV=1	1	20230315_zy_umod_g-after.18640.18640.3	controllerType=0 controllerNumber=1 scan=18640	70.4526
E.TC[+57.021]VPVLRC[+57.021]NTAAPMWLN[+2391.857]GTHPSSDE.G	HexNAc(5)Hex(4)Fuc(1)NeuAc(2)	C[+57]*2, N[+2392]	1302.04	4	5205.13	5205.14	0	-0.6	216	Specific	278.34	278.34	278.34	6.21	244	>sp|P07911|UROM_HUMAN Uromodulin OS=Homo sapiens OX=9606 GN=UMOD PE=1 SV=1	1	20230315_zy_umod_g-after.19203.19203.4	controllerType=0 controllerNumber=1 scan=19203	72.4989
E.TC[+57.021]VPVLRC[+57.021]NTAAPMWLN[+2391.857]GTHPSSDE.G	HexNAc(5)Hex(4)Fuc(1)NeuAc(2)	C[+57]*2, N[+2392]	1041.83	5	5205.14	5205.14	0	-0.3	216	Specific	312.17	312.17	312.17	5.47	244	>sp|P07911|UROM_HUMAN Uromodulin OS=Homo sapiens OX=9606 GN=UMOD PE=1 SV=1	1	20230315_zy_umod_g-after.18684.18684.5	controllerType=0 controllerNumber=1 scan=18684	70.6055
E.TC[+57.021]VPVLRC[+57.021]NTAAPM[+15.995]WLN[+2391.857]GTHPSSDE.G	HexNAc(5)Hex(4)Fuc(1)NeuAc(2)	C[+57]*2, M[+16], N[+2392]	1306.04	4	5221.13	5221.13	0	-0.9	216	Specific	355.03	355.03	138.26	6.46	244	>sp|P07911|UROM_HUMAN Uromodulin OS=Homo sapiens OX=9606 GN=UMOD PE=1 SV=1	1	20230315_zy_umod_g-after.17770.17770.4	controllerType=0 controllerNumber=1 scan=17770	67.2964
E.TC[+57.021]VPVLRC[+57.021]NTAAPM[+15.995]WLN[+2391.857]GTHPSSDE.G	HexNAc(5)Hex(4)Fuc(1)NeuAc(2)	C[+57]*2, M[+16], N[+2392]	1306.04	4	5221.14	5221.13	0	0.7	216	Specific	407.55	407.55	143.36	7.78	244	>sp|P07911|UROM_HUMAN Uromodulin OS=Homo sapiens OX=9606 GN=UMOD PE=1 SV=1	1	20230315_zy_umod_g-after.17798.17798.4	controllerType=0 controllerNumber=1 scan=17798	67.3996
E.TC[+57.021]VPVLRC[+57.021]NTAAPM[+15.995]WLN[+2391.857]GTHPSSDE.G	HexNAc(5)Hex(4)Fuc(1)NeuAc(2)	C[+57]*2, M[+16], N[+2392]	1306.04	4	5221.13	5221.13	0	-0.6	216	Specific	452.84	452.84	273.3	7.44	244	>sp|P07911|UROM_HUMAN Uromodulin OS=Homo sapiens OX=9606 GN=UMOD PE=1 SV=1	1	20230315_zy_umod_g-after.17763.17763.4	controllerType=0 controllerNumber=1 scan=17763	67.2749
E.TC[+57.021]VPVLRC[+57.021]NTAAPMWLN[+2391.857]GTHPSSDE.G	HexNAc(5)Hex(4)Fuc(1)NeuAc(2)	C[+57]*2, N[+2392]	1302.04	4	5205.14	5205.14	0	-0.3	216	Specific	476.16	476.16	476.16	7.44	244	>sp|P07911|UROM_HUMAN Uromodulin OS=Homo sapiens OX=9606 GN=UMOD PE=1 SV=1	1	20230315_zy_umod_g-after.18638.18638.4	controllerType=0 controllerNumber=1 scan=18638	70.4469
E.TC[+57.021]VPVLRC[+57.021]NTAAPMWLN[+2391.857]GTHPSSDE.G	HexNAc(5)Hex(4)Fuc(1)NeuAc(2)	C[+57]*2, N[+2392]	1302.04	4	5205.13	5205.14	0	-1	216	Specific	485.68	485.68	485.68	7.5	244	>sp|P07911|UROM_HUMAN Uromodulin OS=Homo sapiens OX=9606 GN=UMOD PE=1 SV=1	1	20230315_zy_umod_g-after.18644.18644.4	controllerType=0 controllerNumber=1 scan=18644	70.4628
E.TC[+57.021]VPVLRC[+57.021]NTAAPM[+15.995]WLN[+2391.857]GTHPSSDE.G	HexNAc(5)Hex(4)Fuc(1)NeuAc(2)	C[+57]*2, M[+16], N[+2392]	1306.04	4	5221.13	5221.13	0	-0.8	216	Specific	529.54	529.54	305.54	7.72	244	>sp|P07911|UROM_HUMAN Uromodulin OS=Homo sapiens OX=9606 GN=UMOD PE=1 SV=1	1	20230315_zy_umod_g-after.17848.17848.4	controllerType=0 controllerNumber=1 scan=17848	67.5829
E.TC[+57.021]VPVLRC[+57.021]NTAAPMWLN[+1954.704]GTHPSSDE.G	HexNAc(5)Hex(4)NeuAc(1)	C[+57]*2, N[+1955]	1192.75	4	4767.99	4767.98	0	2	216	Specific	205.77	205.77	92.73	6.61	244	>sp|P07911|UROM_HUMAN Uromodulin OS=Homo sapiens OX=9606 GN=UMOD PE=1 SV=1	1	20230315_zy_umod_g-after.18270.18270.4	controllerType=0 controllerNumber=1 scan=18270	69.0993
E.TC[+57.021]VPVLRC[+57.021]NTAAPM[+15.995]WLN[+1954.704]GTHPSSDE.G	HexNAc(5)Hex(4)NeuAc(1)	C[+57]*2, M[+16], N[+1955]	1196.75	4	4783.97	4783.98	0	-0.8	216	Specific	255	255	217.7	6.17	244	>sp|P07911|UROM_HUMAN Uromodulin OS=Homo sapiens OX=9606 GN=UMOD PE=1 SV=1	1	20230315_zy_umod_g-after.17641.17641.4	controllerType=0 controllerNumber=1 scan=17641	66.8101
E.TC[+57.021]VPVLRC[+57.021]NTAAPM[+15.995]WLN[+1954.704]GTHPSSDE.G	HexNAc(5)Hex(4)NeuAc(1)	C[+57]*2, M[+16], N[+1955]	1594.99	3	4782.97	4783.98	-1	-1.2	216	Specific	300.09	300.09	300.09	5.15	244	>sp|P07911|UROM_HUMAN Uromodulin OS=Homo sapiens OX=9606 GN=UMOD PE=1 SV=1	1	20230315_zy_umod_g-after.17681.17681.3	controllerType=0 controllerNumber=1 scan=17681	66.9678
E.TC[+57.021]VPVLRC[+57.021]NTAAPM[+15.995]WLN[+1954.704]GTHPSSDE.G	HexNAc(5)Hex(4)NeuAc(1)	C[+57]*2, M[+16], N[+1955]	1196.75	4	4783.99	4783.98	0	1.3	216	Specific	362.38	362.38	159.41	6.86	244	>sp|P07911|UROM_HUMAN Uromodulin OS=Homo sapiens OX=9606 GN=UMOD PE=1 SV=1	1	20230315_zy_umod_g-after.17207.17207.4	controllerType=0 controllerNumber=1 scan=17207	65.1885
E.TC[+57.021]VPVLRC[+57.021]NTAAPM[+15.995]WLN[+1954.704]GTHPSSDE.G	HexNAc(5)Hex(4)NeuAc(1)	C[+57]*2, M[+16], N[+1955]	1196.75	4	4783.98	4783.98	0	0.5	216	Specific	383.47	383.47	279.47	7.86	244	>sp|P07911|UROM_HUMAN Uromodulin OS=Homo sapiens OX=9606 GN=UMOD PE=1 SV=1	1	20230315_zy_umod_g-after.17242.17242.4	controllerType=0 controllerNumber=1 scan=17242	65.3285
E.TC[+57.021]VPVLRC[+57.021]NTAAPM[+15.995]WLN[+1954.704]GTHPSSDE.G	HexNAc(5)Hex(4)NeuAc(1)	C[+57]*2, M[+16], N[+1955]	1595.33	3	4783.99	4783.98	0	1.7	216	Specific	436.02	436.02	280.2	7.11	244	>sp|P07911|UROM_HUMAN Uromodulin OS=Homo sapiens OX=9606 GN=UMOD PE=1 SV=1	1	20230315_zy_umod_g-after.17228.17228.3	controllerType=0 controllerNumber=1 scan=17228	65.2757
E.TC[+57.021]VPVLRC[+57.021]NTAAPM[+15.995]WLN[+1954.704]GTHPSSDE.G	HexNAc(5)Hex(4)NeuAc(1)	C[+57]*2, M[+16], N[+1955]	1196.75	4	4783.98	4783.98	0	1	216	Specific	447.59	447.59	324.89	7.81	244	>sp|P07911|UROM_HUMAN Uromodulin OS=Homo sapiens OX=9606 GN=UMOD PE=1 SV=1	1	20230315_zy_umod_g-after.17131.17131.4	controllerType=0 controllerNumber=1 scan=17131	64.9113
E.TC[+57.021]VPVLRC[+57.021]NTAAPMWLN[+1954.704]GTHPSSDE.G	HexNAc(5)Hex(4)NeuAc(1)	C[+57]*2, N[+1955]	1192.75	4	4767.99	4767.98	0	0.4	216	Specific	458.26	458.26	291.98	7.81	244	>sp|P07911|UROM_HUMAN Uromodulin OS=Homo sapiens OX=9606 GN=UMOD PE=1 SV=1	1	20230315_zy_umod_g-after.18247.18247.4	controllerType=0 controllerNumber=1 scan=18247	69.0235
E.TC[+57.021]VPVLRC[+57.021]NTAAPM[+15.995]WLN[+1954.704]GTHPSSDE.G	HexNAc(5)Hex(4)NeuAc(1)	C[+57]*2, M[+16], N[+1955]	1196.75	4	4783.99	4783.98	0	1.4	216	Specific	462.51	462.51	193.88	7.81	244	>sp|P07911|UROM_HUMAN Uromodulin OS=Homo sapiens OX=9606 GN=UMOD PE=1 SV=1	1	20230315_zy_umod_g-after.17040.17040.4	controllerType=0 controllerNumber=1 scan=17040	64.568
E.TC[+57.021]VPVLRC[+57.021]NTAAPM[+15.995]WLN[+1954.704]GTHPSSDE.G	HexNAc(5)Hex(4)NeuAc(1)	C[+57]*2, M[+16], N[+1955]	1595.33	3	4783.99	4783.98	0	1.7	216	Specific	462.85	462.85	283.39	7.14	244	>sp|P07911|UROM_HUMAN Uromodulin OS=Homo sapiens OX=9606 GN=UMOD PE=1 SV=1	1	20230315_zy_umod_g-after.17049.17049.3	controllerType=0 controllerNumber=1 scan=17049	64.6037
E.TC[+57.021]VPVLRC[+57.021]NTAAPM[+15.995]WLN[+1954.704]GTHPSSDE.G	HexNAc(5)Hex(4)NeuAc(1)	C[+57]*2, M[+16], N[+1955]	1196.75	4	4783.98	4783.98	0	0.9	216	Specific	474.49	474.49	211.44	7.81	244	>sp|P07911|UROM_HUMAN Uromodulin OS=Homo sapiens OX=9606 GN=UMOD PE=1 SV=1	1	20230315_zy_umod_g-after.17123.17123.4	controllerType=0 controllerNumber=1 scan=17123	64.8762
E.TC[+57.021]VPVLRC[+57.021]NTAAPM[+15.995]WLN[+1954.704]GTHPSSDE.G	HexNAc(5)Hex(4)NeuAc(1)	C[+57]*2, M[+16], N[+1955]	1595.33	3	4783.99	4783.98	0	2	216	Specific	505.76	505.76	266.61	7.19	244	>sp|P07911|UROM_HUMAN Uromodulin OS=Homo sapiens OX=9606 GN=UMOD PE=1 SV=1	1	20230315_zy_umod_g-after.17132.17132.3	controllerType=0 controllerNumber=1 scan=17132	64.9136
E.TC[+57.021]VPVLRC[+57.021]NTAAPM[+15.995]WLN[+1954.704]GTHPSSDE.G	HexNAc(5)Hex(4)NeuAc(1)	C[+57]*2, M[+16], N[+1955]	1196.5	4	4782.98	4783.98	-1	0.3	216	Specific	518.51	518.51	518.51	7.4	244	>sp|P07911|UROM_HUMAN Uromodulin OS=Homo sapiens OX=9606 GN=UMOD PE=1 SV=1	1	20230315_zy_umod_g-after.17047.17047.4	controllerType=0 controllerNumber=1 scan=17047	64.5979
E.TC[+57.021]VPVLRC[+57.021]NTAAPMWLN[+1954.704]GTHPSSDE.G	HexNAc(5)Hex(4)NeuAc(1)	C[+57]*2, N[+1955]	1590	3	4767.99	4767.98	0	1.3	216	Specific	599.68	599.68	289.57	8.08	244	>sp|P07911|UROM_HUMAN Uromodulin OS=Homo sapiens OX=9606 GN=UMOD PE=1 SV=1	1	20230315_zy_umod_g-after.18175.18175.3	controllerType=0 controllerNumber=1 scan=18175	68.7616
E.TC[+57.021]VPVLRC[+57.021]NTAAPMWLN[+1954.704]GTHPSSDE.G	HexNAc(5)Hex(4)NeuAc(1)	C[+57]*2, N[+1955]	1192.75	4	4767.99	4767.98	0	0.4	216	Specific	602.82	602.82	222.42	9.75	244	>sp|P07911|UROM_HUMAN Uromodulin OS=Homo sapiens OX=9606 GN=UMOD PE=1 SV=1	1	20230315_zy_umod_g-after.18167.18167.4	controllerType=0 controllerNumber=1 scan=18167	68.7279
E.TC[+57.021]VPVLRC[+57.021]NTAAPMWLN[+1954.704]GTHPSSDE.G	HexNAc(5)Hex(4)NeuAc(1)	C[+57]*2, N[+1955]	1192.75	4	4767.99	4767.98	0	0.3	216	Specific	702.65	702.65	409.8	11.75	244	>sp|P07911|UROM_HUMAN Uromodulin OS=Homo sapiens OX=9606 GN=UMOD PE=1 SV=1	1	20230315_zy_umod_g-after.18163.18163.4	controllerType=0 controllerNumber=1 scan=18163	68.7176
E.TC[+57.021]VPVLRC[+57.021]NTAAPM[+15.995]WLN[+2245.799]GTHPSSDE.G	HexNAc(5)Hex(4)NeuAc(2)	C[+57]*2, M[+16], N[+2246]	1692.37	3	5075.08	5075.07	0	1.9	216	Specific	200.62	200.62	80.46	5.85	244	>sp|P07911|UROM_HUMAN Uromodulin OS=Homo sapiens OX=9606 GN=UMOD PE=1 SV=1	1	20230315_zy_umod_g-after.17996.17996.3	controllerType=0 controllerNumber=1 scan=17996	68.1228
E.TC[+57.021]VPVLRC[+57.021]NTAAPMWLN[+2245.799]GTHPSSDE.G	HexNAc(5)Hex(4)NeuAc(2)	C[+57]*2, N[+2246]	1265.78	4	5060.09	5059.08	1	2	216	Specific	218.98	218.98	218.98	6.61	244	>sp|P07911|UROM_HUMAN Uromodulin OS=Homo sapiens OX=9606 GN=UMOD PE=1 SV=1	1	20230315_zy_umod_g-after.18604.18604.4	controllerType=0 controllerNumber=1 scan=18604	70.3232
E.TC[+57.021]VPVLRC[+57.021]NTAAPMWLN[+2245.799]GTHPSSDE.G	HexNAc(5)Hex(4)NeuAc(2)	C[+57]*2, N[+2246]	1687.03	3	5059.08	5059.08	0	0.9	216	Specific	240.78	240.78	240.78	5.86	244	>sp|P07911|UROM_HUMAN Uromodulin OS=Homo sapiens OX=9606 GN=UMOD PE=1 SV=1	1	20230315_zy_umod_g-after.18745.18745.3	controllerType=0 controllerNumber=1 scan=18745	70.8231
E.TC[+57.021]VPVLRC[+57.021]NTAAPM[+15.995]WLN[+2245.799]GTHPSSDE.G	HexNAc(5)Hex(4)NeuAc(2)	C[+57]*2, M[+16], N[+2246]	1269.52	4	5075.05	5075.07	0	-4.8	216	Specific	256.48	256.48	256.48	5.46	244	>sp|P07911|UROM_HUMAN Uromodulin OS=Homo sapiens OX=9606 GN=UMOD PE=1 SV=1	1	20230315_zy_umod_g-after.18322.18322.4	controllerType=0 controllerNumber=1 scan=18322	69.287
E.TC[+57.021]VPVLRC[+57.021]NTAAPM[+15.995]WLN[+2245.799]GTHPSSDE.G	HexNAc(5)Hex(4)NeuAc(2)	C[+57]*2, M[+16], N[+2246]	1692.36	3	5075.08	5075.07	0	1	216	Specific	258.83	258.83	125.35	5.86	244	>sp|P07911|UROM_HUMAN Uromodulin OS=Homo sapiens OX=9606 GN=UMOD PE=1 SV=1	1	20230315_zy_umod_g-after.17990.17990.3	controllerType=0 controllerNumber=1 scan=17990	68.103
E.TC[+57.021]VPVLRC[+57.021]NTAAPM[+15.995]WLN[+2245.799]GTHPSSDE.G	HexNAc(5)Hex(4)NeuAc(2)	C[+57]*2, M[+16], N[+2246]	1692.03	3	5074.08	5075.07	-1	1.4	216	Specific	262.89	262.89	262.89	5.45	244	>sp|P07911|UROM_HUMAN Uromodulin OS=Homo sapiens OX=9606 GN=UMOD PE=1 SV=1	1	20230315_zy_umod_g-after.18079.18079.3	controllerType=0 controllerNumber=1 scan=18079	68.414
E.TC[+57.021]VPVLRC[+57.021]NTAAPM[+15.995]WLN[+2245.799]GTHPSSDE.G	HexNAc(5)Hex(4)NeuAc(2)	C[+57]*2, M[+16], N[+2246]	1692.03	3	5074.08	5075.07	-1	2	216	Specific	267.49	267.49	267.49	5.45	244	>sp|P07911|UROM_HUMAN Uromodulin OS=Homo sapiens OX=9606 GN=UMOD PE=1 SV=1	1	20230315_zy_umod_g-after.18387.18387.3	controllerType=0 controllerNumber=1 scan=18387	69.5291
E.TC[+57.021]VPVLRC[+57.021]NTAAPM[+15.995]WLN[+2245.799]GTHPSSDE.G	HexNAc(5)Hex(4)NeuAc(2)	C[+57]*2, M[+16], N[+2246]	1269.27	4	5074.07	5075.07	-1	-0.5	216	Specific	294.49	294.49	294.49	5.89	244	>sp|P07911|UROM_HUMAN Uromodulin OS=Homo sapiens OX=9606 GN=UMOD PE=1 SV=1	1	20230315_zy_umod_g-after.18402.18402.4	controllerType=0 controllerNumber=1 scan=18402	69.5843
E.TC[+57.021]VPVLRC[+57.021]NTAAPMWLN[+2245.799]GTHPSSDE.G	HexNAc(5)Hex(4)NeuAc(2)	C[+57]*2, N[+2246]	1265.78	4	5060.09	5059.08	1	1.3	216	Specific	297.36	297.36	297.36	6.72	244	>sp|P07911|UROM_HUMAN Uromodulin OS=Homo sapiens OX=9606 GN=UMOD PE=1 SV=1	1	20230315_zy_umod_g-after.18543.18543.4	controllerType=0 controllerNumber=1 scan=18543	70.1016
E.TC[+57.021]VPVLRC[+57.021]NTAAPM[+15.995]WLN[+2245.799]GTHPSSDE.G	HexNAc(5)Hex(4)NeuAc(2)	C[+57]*2, M[+16], N[+2246]	1269.53	4	5075.08	5075.07	0	0.9	216	Specific	402.43	402.43	52.62	7.78	244	>sp|P07911|UROM_HUMAN Uromodulin OS=Homo sapiens OX=9606 GN=UMOD PE=1 SV=1	1	20230315_zy_umod_g-after.18380.18380.4	controllerType=0 controllerNumber=1 scan=18380	69.499
E.TC[+57.021]VPVLRC[+57.021]NTAAPM[+15.995]WLN[+2245.799]GTHPSSDE.G	HexNAc(5)Hex(4)NeuAc(2)	C[+57]*2, M[+16], N[+2246]	1269.53	4	5075.09	5075.07	0	2.6	216	Specific	413.3	413.3	198.71	7.29	244	>sp|P07911|UROM_HUMAN Uromodulin OS=Homo sapiens OX=9606 GN=UMOD PE=1 SV=1	1	20230315_zy_umod_g-after.17961.17961.4	controllerType=0 controllerNumber=1 scan=17961	68.0007
E.TC[+57.021]VPVLRC[+57.021]NTAAPMWLN[+2245.799]GTHPSSDE.G	HexNAc(5)Hex(4)NeuAc(2)	C[+57]*2, N[+2246]	1012.62	5	5059.09	5059.08	0	1.2	216	Specific	423.06	423.06	423.06	6.89	244	>sp|P07911|UROM_HUMAN Uromodulin OS=Homo sapiens OX=9606 GN=UMOD PE=1 SV=1	1	20230315_zy_umod_g-after.18798.18798.5	controllerType=0 controllerNumber=1 scan=18798	71.0198
E.TC[+57.021]VPVLRC[+57.021]NTAAPMWLN[+2245.799]GTHPSSDE.G	HexNAc(5)Hex(4)NeuAc(2)	C[+57]*2, N[+2246]	1265.53	4	5059.09	5059.08	0	2.4	216	Specific	463.99	463.99	463.99	7.81	244	>sp|P07911|UROM_HUMAN Uromodulin OS=Homo sapiens OX=9606 GN=UMOD PE=1 SV=1	1	20230315_zy_umod_g-after.18753.18753.4	controllerType=0 controllerNumber=1 scan=18753	70.8584
E.TC[+57.021]VPVLRC[+57.021]NTAAPM[+15.995]WLN[+2245.799]GTHPSSDE.G	HexNAc(5)Hex(4)NeuAc(2)	C[+57]*2, M[+16], N[+2246]	1269.53	4	5075.08	5075.07	0	0.9	216	Specific	503.48	503.48	300.96	7.86	244	>sp|P07911|UROM_HUMAN Uromodulin OS=Homo sapiens OX=9606 GN=UMOD PE=1 SV=1	1	20230315_zy_umod_g-after.18062.18062.4	controllerType=0 controllerNumber=1 scan=18062	68.3579
E.TC[+57.021]VPVLRC[+57.021]NTAAPMWLN[+1971.719]GTHPSSDE.G	HexNAc(5)Hex(5)Fuc(1)	C[+57]*2, N[+1972]	1196.75	4	4783.98	4785	-1	-2.8	216	Specific	281.91	281.91	33.94	3.17	244	>sp|P07911|UROM_HUMAN Uromodulin OS=Homo sapiens OX=9606 GN=UMOD PE=1 SV=1	1	20230315_zy_umod_g-after.14065.14065.4	controllerType=0 controllerNumber=1 scan=14065	53.4498
E.TC[+57.021]VPVLRC[+57.021]NTAAPMWLN[+2262.814]GTHPSSDE.G	HexNAc(5)Hex(5)Fuc(1)NeuAc(1)	C[+57]*2, N[+2263]	1269.53	4	5075.08	5076.09	-1	-2.3	216	Specific	312.46	312.46	53.67	3.82	244	>sp|P07911|UROM_HUMAN Uromodulin OS=Homo sapiens OX=9606 GN=UMOD PE=1 SV=1	1	20230315_zy_umod_g-after.15687.15687.4	controllerType=0 controllerNumber=1 scan=15687	59.511
E.TC[+57.021]VPVLRC[+57.021]NTAAPMWLN[+2262.814]GTHPSSDE.G	HexNAc(5)Hex(5)Fuc(1)NeuAc(1)	C[+57]*2, N[+2263]	1269.53	4	5075.08	5076.09	-1	-2.5	216	Specific	321	321	35.92	5.67	244	>sp|P07911|UROM_HUMAN Uromodulin OS=Homo sapiens OX=9606 GN=UMOD PE=1 SV=1	1	20230315_zy_umod_g-after.15520.15520.4	controllerType=0 controllerNumber=1 scan=15520	58.8981
E.TC[+57.021]VPVLRC[+57.021]NTAAPMWLN[+2262.814]GTHPSSDE.G	HexNAc(5)Hex(5)Fuc(1)NeuAc(1)	C[+57]*2, N[+2263]	1269.53	4	5075.08	5076.09	-1	-2.5	216	Specific	326.21	326.21	57.54	3.67	244	>sp|P07911|UROM_HUMAN Uromodulin OS=Homo sapiens OX=9606 GN=UMOD PE=1 SV=1	1	20230315_zy_umod_g-after.15772.15772.4	controllerType=0 controllerNumber=1 scan=15772	59.8245
E.TC[+57.021]VPVLRC[+57.021]NTAAPMWLN[+2262.814]GTHPSSDE.G	HexNAc(5)Hex(5)Fuc(1)NeuAc(1)	C[+57]*2, N[+2263]	1269.78	4	5076.09	5076.09	0	0	216	Specific	335.11	335.11	78.52	6.75	244	>sp|P07911|UROM_HUMAN Uromodulin OS=Homo sapiens OX=9606 GN=UMOD PE=1 SV=1	1	20230315_zy_umod_g-after.18140.18140.4	controllerType=0 controllerNumber=1 scan=18140	68.6317
E.TC[+57.021]VPVLRC[+57.021]NTAAPMWLN[+2262.814]GTHPSSDE.G	HexNAc(5)Hex(5)Fuc(1)NeuAc(1)	C[+57]*2, N[+2263]	1269.53	4	5075.09	5076.09	-1	-0.7	216	Specific	423.27	423.27	151.85	6.95	244	>sp|P07911|UROM_HUMAN Uromodulin OS=Homo sapiens OX=9606 GN=UMOD PE=1 SV=1	1	20230315_zy_umod_g-after.18148.18148.4	controllerType=0 controllerNumber=1 scan=18148	68.6646
E.TC[+57.021]VPVLRC[+57.021]NTAAPMWLN[+2553.910]GTHPSSDE.G	HexNAc(5)Hex(5)Fuc(1)NeuAc(2)	C[+57]*2, N[+2554]	1789.74	3	5367.2	5367.19	0	1.9	216	Specific	272.93	272.93	272.93	5.91	244	>sp|P07911|UROM_HUMAN Uromodulin OS=Homo sapiens OX=9606 GN=UMOD PE=1 SV=1	1	20230315_zy_umod_g-after.18699.18699.3	controllerType=0 controllerNumber=1 scan=18699	70.6602
E.TC[+57.021]VPVLRC[+57.021]NTAAPMWLN[+2553.910]GTHPSSDE.G	HexNAc(5)Hex(5)Fuc(1)NeuAc(2)	C[+57]*2, N[+2554]	1342.56	4	5367.2	5367.19	0	2.5	216	Specific	486.27	486.27	486.27	7.38	244	>sp|P07911|UROM_HUMAN Uromodulin OS=Homo sapiens OX=9606 GN=UMOD PE=1 SV=1	1	20230315_zy_umod_g-after.18678.18678.4	controllerType=0 controllerNumber=1 scan=18678	70.5838
E.TC[+57.021]VPVLRC[+57.021]NTAAPM[+15.995]WLN[+2553.910]GTHPSSDE.G	HexNAc(5)Hex(5)Fuc(1)NeuAc(2)	C[+57]*2, M[+16], N[+2554]	1346.3	4	5382.18	5383.19	-1	-0.5	216	Specific	491.78	491.78	319.85	7.03	244	>sp|P07911|UROM_HUMAN Uromodulin OS=Homo sapiens OX=9606 GN=UMOD PE=1 SV=1	1	20230315_zy_umod_g-after.17851.17851.4	controllerType=0 controllerNumber=1 scan=17851	67.5918
E.TC[+57.021]VPVLRC[+57.021]NTAAPM[+15.995]WLN[+2553.910]GTHPSSDE.G	HexNAc(5)Hex(5)Fuc(1)NeuAc(2)	C[+57]*2, M[+16], N[+2554]	1346.55	4	5383.19	5383.19	0	0.4	216	Specific	499.02	499.02	183.43	7.86	244	>sp|P07911|UROM_HUMAN Uromodulin OS=Homo sapiens OX=9606 GN=UMOD PE=1 SV=1	1	20230315_zy_umod_g-after.17844.17844.4	controllerType=0 controllerNumber=1 scan=17844	67.568
E.TC[+57.021]VPVLRC[+57.021]NTAAPMWLN[+2553.910]GTHPSSDE.G	HexNAc(5)Hex(5)Fuc(1)NeuAc(2)	C[+57]*2, N[+2554]	1342.55	4	5367.2	5367.19	0	1.5	216	Specific	544.82	544.82	544.82	8.09	244	>sp|P07911|UROM_HUMAN Uromodulin OS=Homo sapiens OX=9606 GN=UMOD PE=1 SV=1	1	20230315_zy_umod_g-after.18696.18696.4	controllerType=0 controllerNumber=1 scan=18696	70.6518
E.TC[+57.021]VPVLRC[+57.021]NTAAPMWLN[+2116.756]GTHPSSDE.G	HexNAc(5)Hex(5)NeuAc(1)	C[+57]*2, N[+2117]	1233.27	4	4930.04	4930.04	0	0.4	216	Specific	222.58	222.58	28.4	6.61	244	>sp|P07911|UROM_HUMAN Uromodulin OS=Homo sapiens OX=9606 GN=UMOD PE=1 SV=1	1	20230315_zy_umod_g-after.13885.13885.4	controllerType=0 controllerNumber=1 scan=13885	52.7813
E.TC[+57.021]VPVLRC[+57.021]NTAAPM[+15.995]WLN[+2116.756]GTHPSSDE.G	HexNAc(5)Hex(5)NeuAc(1)	C[+57]*2, M[+16], N[+2117]	1649.02	3	4945.04	4946.03	-1	1.5	216	Specific	230.91	230.91	230.91	5.48	244	>sp|P07911|UROM_HUMAN Uromodulin OS=Homo sapiens OX=9606 GN=UMOD PE=1 SV=1	1	20230315_zy_umod_g-after.17297.17297.3	controllerType=0 controllerNumber=1 scan=17297	65.5307
E.TC[+57.021]VPVLRC[+57.021]NTAAPMWLN[+2407.852]GTHPSSDE.G	HexNAc(5)Hex(5)NeuAc(2)	C[+57]*2, N[+2408]	1740.72	3	5220.14	5221.13	-1	2	216	Specific	278.74	278.74	208.76	5.45	244	>sp|P07911|UROM_HUMAN Uromodulin OS=Homo sapiens OX=9606 GN=UMOD PE=1 SV=1	1	20230315_zy_umod_g-after.18813.18813.3	controllerType=0 controllerNumber=1 scan=18813	71.073
E.TC[+57.021]VPVLRC[+57.021]NTAAPMWLN[+2407.852]GTHPSSDE.G	HexNAc(5)Hex(5)NeuAc(2)	C[+57]*2, N[+2408]	1306.04	4	5221.14	5221.13	0	1.2	216	Specific	282.63	282.63	39.05	4.81	244	>sp|P07911|UROM_HUMAN Uromodulin OS=Homo sapiens OX=9606 GN=UMOD PE=1 SV=1	1	20230315_zy_umod_g-after.15018.15018.4	controllerType=0 controllerNumber=1 scan=15018	57.0485
E.TC[+57.021]VPVLRC[+57.021]NTAAPMWLN[+2407.852]GTHPSSDE.G	HexNAc(5)Hex(5)NeuAc(2)	C[+57]*2, N[+2408]	1306.04	4	5221.14	5221.13	0	1.5	216	Specific	302.23	302.23	44.9	6.72	244	>sp|P07911|UROM_HUMAN Uromodulin OS=Homo sapiens OX=9606 GN=UMOD PE=1 SV=1	1	20230315_zy_umod_g-after.15129.15129.4	controllerType=0 controllerNumber=1 scan=15129	57.4595
E.TC[+57.021]VPVLRC[+57.021]NTAAPM[+15.995]WLN[+2407.852]GTHPSSDE.G	HexNAc(5)Hex(5)NeuAc(2)	C[+57]*2, M[+16], N[+2408]	1310.04	4	5237.14	5237.13	0	2.7	216	Specific	302.81	302.81	40.42	6.23	244	>sp|P07911|UROM_HUMAN Uromodulin OS=Homo sapiens OX=9606 GN=UMOD PE=1 SV=1	1	20230315_zy_umod_g-after.18056.18056.4	controllerType=0 controllerNumber=1 scan=18056	68.3387
E.TC[+57.021]VPVLRC[+57.021]NTAAPMWLN[+2407.852]GTHPSSDE.G	HexNAc(5)Hex(5)NeuAc(2)	C[+57]*2, N[+2408]	1306.04	4	5221.14	5221.13	0	1.2	216	Specific	332.72	332.72	48.96	5.01	244	>sp|P07911|UROM_HUMAN Uromodulin OS=Homo sapiens OX=9606 GN=UMOD PE=1 SV=1	1	20230315_zy_umod_g-after.15213.15213.4	controllerType=0 controllerNumber=1 scan=15213	57.7617
E.TC[+57.021]VPVLRC[+57.021]NTAAPMWLN[+2407.852]GTHPSSDE.G	HexNAc(5)Hex(5)NeuAc(2)	C[+57]*2, N[+2408]	1306.04	4	5221.14	5221.13	0	1.3	216	Specific	332.78	332.78	50.19	6.75	244	>sp|P07911|UROM_HUMAN Uromodulin OS=Homo sapiens OX=9606 GN=UMOD PE=1 SV=1	1	20230315_zy_umod_g-after.15297.15297.4	controllerType=0 controllerNumber=1 scan=15297	58.0731
E.TC[+57.021]VPVLRC[+57.021]NTAAPM[+15.995]WLN[+2407.852]GTHPSSDE.G	HexNAc(5)Hex(5)NeuAc(2)	C[+57]*2, M[+16], N[+2408]	1310.04	4	5237.13	5237.13	0	0	216	Specific	374.86	374.86	49.74	7.86	244	>sp|P07911|UROM_HUMAN Uromodulin OS=Homo sapiens OX=9606 GN=UMOD PE=1 SV=1	1	20230315_zy_umod_g-after.18037.18037.4	controllerType=0 controllerNumber=1 scan=18037	68.2691
E.TC[+57.021]VPVLRC[+57.021]NTAAPMWLN[+2407.852]GTHPSSDE.G	HexNAc(5)Hex(5)NeuAc(2)	C[+57]*2, N[+2408]	1306.04	4	5221.14	5221.13	0	1.9	216	Specific	484.78	484.78	301.53	7.86	244	>sp|P07911|UROM_HUMAN Uromodulin OS=Homo sapiens OX=9606 GN=UMOD PE=1 SV=1	1	20230315_zy_umod_g-after.18810.18810.4	controllerType=0 controllerNumber=1 scan=18810	71.0637
E.TC[+57.021]VPVLRC[+57.021]NTAAPM[+15.995]WLN[+2424.867]GTHPSSDE.G	HexNAc(5)Hex(6)Fuc(1)NeuAc(1)	C[+57]*2, M[+16], N[+2425]	1314.04	4	5253.14	5254.14	-1	0.5	216	Specific	256.89	256.89	256.89	6.07	244	>sp|P07911|UROM_HUMAN Uromodulin OS=Homo sapiens OX=9606 GN=UMOD PE=1 SV=1	1	20230315_zy_umod_g-after.16510.16510.4	controllerType=0 controllerNumber=1 scan=16510	62.5991
E.TC[+57.021]VPVLRC[+57.021]NTAAPMWLN[+2424.867]GTHPSSDE.G	HexNAc(5)Hex(6)Fuc(1)NeuAc(1)	C[+57]*2, N[+2425]	1310.04	4	5237.15	5238.15	-1	0.8	216	Specific	411.4	411.4	132.32	7.31	244	>sp|P07911|UROM_HUMAN Uromodulin OS=Homo sapiens OX=9606 GN=UMOD PE=1 SV=1	1	20230315_zy_umod_g-after.17991.17991.4	controllerType=0 controllerNumber=1 scan=17991	68.1059
E.TC[+57.021]VPVLRC[+57.021]NTAAPMWLN[+2424.867]GTHPSSDE.G	HexNAc(5)Hex(6)Fuc(1)NeuAc(1)	C[+57]*2, N[+2425]	1310.3	4	5238.16	5238.15	0	2.6	216	Specific	489.88	489.88	489.88	7.38	244	>sp|P07911|UROM_HUMAN Uromodulin OS=Homo sapiens OX=9606 GN=UMOD PE=1 SV=1	1	20230315_zy_umod_g-after.17959.17959.4	controllerType=0 controllerNumber=1 scan=17959	67.9951
E.TC[+57.021]VPVLRC[+57.021]NTAAPMWLN[+2715.963]GTHPSSDE.G	HexNAc(5)Hex(6)Fuc(1)NeuAc(2)	C[+57]*2, N[+2716]	1383.07	4	5529.24	5529.24	0	0.3	216	Specific	314.81	314.81	314.81	6.72	244	>sp|P07911|UROM_HUMAN Uromodulin OS=Homo sapiens OX=9606 GN=UMOD PE=1 SV=1	1	20230315_zy_umod_g-after.18464.18464.4	controllerType=0 controllerNumber=1 scan=18464	69.8123
E.TC[+57.021]VPVLRC[+57.021]NTAAPMWLN[+2715.963]GTHPSSDE.G	HexNAc(5)Hex(6)Fuc(1)NeuAc(2)	C[+57]*2, N[+2716]	1382.82	4	5528.25	5529.24	-1	2.1	216	Specific	316.32	316.32	316.32	6.25	244	>sp|P07911|UROM_HUMAN Uromodulin OS=Homo sapiens OX=9606 GN=UMOD PE=1 SV=1	1	20230315_zy_umod_g-after.18540.18540.4	controllerType=0 controllerNumber=1 scan=18540	70.0923
E.TC[+57.021]VPVLRC[+57.021]NTAAPMWLN[+2715.963]GTHPSSDE.G	HexNAc(5)Hex(6)Fuc(1)NeuAc(2)	C[+57]*2, N[+2716]	1383.07	4	5529.24	5529.24	0	-0.2	216	Specific	327.32	327.32	327.32	6.39	244	>sp|P07911|UROM_HUMAN Uromodulin OS=Homo sapiens OX=9606 GN=UMOD PE=1 SV=1	1	20230315_zy_umod_g-after.18521.18521.4	controllerType=0 controllerNumber=1 scan=18521	70.0213
E.TC[+57.021]VPVLRC[+57.021]NTAAPM[+15.995]WLN[+2715.963]GTHPSSDE.G	HexNAc(5)Hex(6)Fuc(1)NeuAc(2)	C[+57]*2, M[+16], N[+2716]	1387.07	4	5545.24	5545.24	0	0.9	216	Specific	339.58	339.58	339.58	6.75	244	>sp|P07911|UROM_HUMAN Uromodulin OS=Homo sapiens OX=9606 GN=UMOD PE=1 SV=1	1	20230315_zy_umod_g-after.17791.17791.4	controllerType=0 controllerNumber=1 scan=17791	67.3783
E.TC[+57.021]VPVLRC[+57.021]NTAAPM[+15.995]WLN[+2715.963]GTHPSSDE.G	HexNAc(5)Hex(6)Fuc(1)NeuAc(2)	C[+57]*2, M[+16], N[+2716]	1387.06	4	5545.23	5545.24	0	-0.6	216	Specific	455.82	455.82	455.82	7.44	244	>sp|P07911|UROM_HUMAN Uromodulin OS=Homo sapiens OX=9606 GN=UMOD PE=1 SV=1	1	20230315_zy_umod_g-after.17708.17708.4	controllerType=0 controllerNumber=1 scan=17708	67.0688
E.TC[+57.021]VPVLRC[+57.021]NTAAPM[+15.995]WLN[+2715.963]GTHPSSDE.G	HexNAc(5)Hex(6)Fuc(1)NeuAc(2)	C[+57]*2, M[+16], N[+2716]	1387.06	4	5545.24	5545.24	0	0	216	Specific	493.42	493.42	493.42	7.86	244	>sp|P07911|UROM_HUMAN Uromodulin OS=Homo sapiens OX=9606 GN=UMOD PE=1 SV=1	1	20230315_zy_umod_g-after.17728.17728.4	controllerType=0 controllerNumber=1 scan=17728	67.1376
E.TC[+57.021]VPVLRC[+57.021]NTAAPMWLN[+2715.963]GTHPSSDE.G	HexNAc(5)Hex(6)Fuc(1)NeuAc(2)	C[+57]*2, N[+2716]	1383.07	4	5529.25	5529.24	0	1	216	Specific	646.2	646.2	646.2	9.75	244	>sp|P07911|UROM_HUMAN Uromodulin OS=Homo sapiens OX=9606 GN=UMOD PE=1 SV=1	1	20230315_zy_umod_g-after.18639.18639.4	controllerType=0 controllerNumber=1 scan=18639	70.4492
E.TC[+57.021]VPVLRC[+57.021]NTAAPMWLN[+2715.963]GTHPSSDE.G	HexNAc(5)Hex(6)Fuc(1)NeuAc(2)	C[+57]*2, N[+2716]	1383.07	4	5529.25	5529.24	0	2	216	Specific	650.93	650.93	650.93	10.75	244	>sp|P07911|UROM_HUMAN Uromodulin OS=Homo sapiens OX=9606 GN=UMOD PE=1 SV=1	1	20230315_zy_umod_g-after.18574.18574.4	controllerType=0 controllerNumber=1 scan=18574	70.21
E.TC[+57.021]VPVLRC[+57.021]NTAAPM[+15.995]WLN[+3007.058]GTHPSSDE.G	HexNAc(5)Hex(6)Fuc(1)NeuAc(3)	C[+57]*2, M[+16], N[+3007]	1168.07	5	5836.34	5836.33	0	1.9	216	Specific	215.53	215.53	215.53	5.73	244	>sp|P07911|UROM_HUMAN Uromodulin OS=Homo sapiens OX=9606 GN=UMOD PE=1 SV=1	1	20230315_zy_umod_g-after.18332.18332.5	controllerType=0 controllerNumber=1 scan=18332	69.3267
E.TC[+57.021]VPVLRC[+57.021]NTAAPMWLN[+3007.058]GTHPSSDE.G	HexNAc(5)Hex(6)Fuc(1)NeuAc(3)	C[+57]*2, N[+3007]	1164.87	5	5820.33	5820.34	0	-0.7	216	Specific	235.18	235.18	235.18	5.34	244	>sp|P07911|UROM_HUMAN Uromodulin OS=Homo sapiens OX=9606 GN=UMOD PE=1 SV=1	1	20230315_zy_umod_g-after.19096.19096.5	controllerType=0 controllerNumber=1 scan=19096	72.1082
E.TC[+57.021]VPVLRC[+57.021]NTAAPMWLN[+3007.058]GTHPSSDE.G	HexNAc(5)Hex(6)Fuc(1)NeuAc(3)	C[+57]*2, N[+3007]	1164.67	5	5819.33	5820.34	-1	-1.2	216	Specific	288.36	288.36	288.36	4.94	244	>sp|P07911|UROM_HUMAN Uromodulin OS=Homo sapiens OX=9606 GN=UMOD PE=1 SV=1	1	20230315_zy_umod_g-after.19093.19093.5	controllerType=0 controllerNumber=1 scan=19093	72.0988
E.TC[+57.021]VPVLRC[+57.021]NTAAPMWLN[+3007.058]GTHPSSDE.G	HexNAc(5)Hex(6)Fuc(1)NeuAc(3)	C[+57]*2, N[+3007]	1455.84	4	5820.34	5820.34	0	0.1	216	Specific	302.62	302.62	302.62	6.72	244	>sp|P07911|UROM_HUMAN Uromodulin OS=Homo sapiens OX=9606 GN=UMOD PE=1 SV=1	1	20230315_zy_umod_g-after.19502.19502.4	controllerType=0 controllerNumber=1 scan=19502	73.6167
E.TC[+57.021]VPVLRC[+57.021]NTAAPMWLN[+3007.058]GTHPSSDE.G	HexNAc(5)Hex(6)Fuc(1)NeuAc(3)	C[+57]*2, N[+3007]	1455.84	4	5820.34	5820.34	0	0.5	216	Specific	306.75	306.75	306.75	6.72	244	>sp|P07911|UROM_HUMAN Uromodulin OS=Homo sapiens OX=9606 GN=UMOD PE=1 SV=1	1	20230315_zy_umod_g-after.19076.19076.4	controllerType=0 controllerNumber=1 scan=19076	72.0395
E.TC[+57.021]VPVLRC[+57.021]NTAAPM[+15.995]WLN[+3007.058]GTHPSSDE.G	HexNAc(5)Hex(6)Fuc(1)NeuAc(3)	C[+57]*2, M[+16], N[+3007]	1460.09	4	5837.34	5836.33	1	-0.3	216	Specific	368.11	368.11	44	6.49	244	>sp|P07911|UROM_HUMAN Uromodulin OS=Homo sapiens OX=9606 GN=UMOD PE=1 SV=1	1	20230315_zy_umod_g-after.18416.18416.4	controllerType=0 controllerNumber=1 scan=18416	69.6351
E.TC[+57.021]VPVLRC[+57.021]NTAAPM[+15.995]WLN[+3007.058]GTHPSSDE.G	HexNAc(5)Hex(6)Fuc(1)NeuAc(3)	C[+57]*2, M[+16], N[+3007]	1459.84	4	5836.34	5836.33	0	2	216	Specific	447.81	447.81	447.81	7.81	244	>sp|P07911|UROM_HUMAN Uromodulin OS=Homo sapiens OX=9606 GN=UMOD PE=1 SV=1	1	20230315_zy_umod_g-after.18407.18407.4	controllerType=0 controllerNumber=1 scan=18407	69.5976
E.TC[+57.021]VPVLRC[+57.021]NTAAPM[+15.995]WLN[+3007.058]GTHPSSDE.G	HexNAc(5)Hex(6)Fuc(1)NeuAc(3)	C[+57]*2, M[+16], N[+3007]	1459.85	4	5836.36	5836.33	0	4.3	216	Specific	457.95	457.95	457.95	6.89	244	>sp|P07911|UROM_HUMAN Uromodulin OS=Homo sapiens OX=9606 GN=UMOD PE=1 SV=1	1	20230315_zy_umod_g-after.18297.18297.4	controllerType=0 controllerNumber=1 scan=18297	69.1948
E.TC[+57.021]VPVLRC[+57.021]NTAAPMWLN[+3007.058]GTHPSSDE.G	HexNAc(5)Hex(6)Fuc(1)NeuAc(3)	C[+57]*2, N[+3007]	1455.59	4	5819.34	5820.34	-1	1	216	Specific	524.54	524.54	524.54	7.63	244	>sp|P07911|UROM_HUMAN Uromodulin OS=Homo sapiens OX=9606 GN=UMOD PE=1 SV=1	1	20230315_zy_umod_g-after.19036.19036.4	controllerType=0 controllerNumber=1 scan=19036	71.8912
E.TC[+57.021]VPVLRC[+57.021]NTAAPM[+15.995]WLN[+3007.058]GTHPSSDE.G	HexNAc(5)Hex(6)Fuc(1)NeuAc(3)	C[+57]*2, M[+16], N[+3007]	1459.84	4	5836.34	5836.33	0	1.5	216	Specific	586.87	586.87	586.87	8.75	244	>sp|P07911|UROM_HUMAN Uromodulin OS=Homo sapiens OX=9606 GN=UMOD PE=1 SV=1	1	20230315_zy_umod_g-after.18331.18331.4	controllerType=0 controllerNumber=1 scan=18331	69.3244
E.TC[+57.021]VPVLRC[+57.021]NTAAPMWLN[+3007.058]GTHPSSDE.G	HexNAc(5)Hex(6)Fuc(1)NeuAc(3)	C[+57]*2, N[+3007]	1455.84	4	5820.34	5820.34	0	0.6	216	Specific	598.09	598.09	598.09	8.75	244	>sp|P07911|UROM_HUMAN Uromodulin OS=Homo sapiens OX=9606 GN=UMOD PE=1 SV=1	1	20230315_zy_umod_g-after.19160.19160.4	controllerType=0 controllerNumber=1 scan=19160	72.3447
E.TC[+57.021]VPVLRC[+57.021]NTAAPM[+15.995]WLN[+2278.809]GTHPSSDE.G	HexNAc(5)Hex(6)NeuAc(1)	C[+57]*2, M[+16], N[+2279]	1277.52	4	5107.07	5108.08	-1	-1.6	216	Specific	213.45	213.45	213.45	5.71	244	>sp|P07911|UROM_HUMAN Uromodulin OS=Homo sapiens OX=9606 GN=UMOD PE=1 SV=1	1	20230315_zy_umod_g-after.16843.16843.4	controllerType=0 controllerNumber=1 scan=16843	63.8441
E.TC[+57.021]VPVLRC[+57.021]NTAAPMWLN[+2278.809]GTHPSSDE.G	HexNAc(5)Hex(6)NeuAc(1)	C[+57]*2, N[+2279]	1697.7	3	5091.09	5092.09	-1	1.1	216	Specific	226.72	226.72	183.69	5.48	244	>sp|P07911|UROM_HUMAN Uromodulin OS=Homo sapiens OX=9606 GN=UMOD PE=1 SV=1	1	20230315_zy_umod_g-after.18081.18081.3	controllerType=0 controllerNumber=1 scan=18081	68.4188
E.TC[+57.021]VPVLRC[+57.021]NTAAPM[+15.995]WLN[+2278.809]GTHPSSDE.G	HexNAc(5)Hex(6)NeuAc(1)	C[+57]*2, M[+16], N[+2279]	1277.52	4	5107.07	5108.08	-1	-2.4	216	Specific	253.82	253.82	253.82	5.45	244	>sp|P07911|UROM_HUMAN Uromodulin OS=Homo sapiens OX=9606 GN=UMOD PE=1 SV=1	1	20230315_zy_umod_g-after.16795.16795.4	controllerType=0 controllerNumber=1 scan=16795	63.6737
E.TC[+57.021]VPVLRC[+57.021]NTAAPM[+15.995]WLN[+2278.809]GTHPSSDE.G	HexNAc(5)Hex(6)NeuAc(1)	C[+57]*2, M[+16], N[+2279]	1277.78	4	5108.09	5108.08	0	1.7	216	Specific	388.36	388.36	275.87	7.86	244	>sp|P07911|UROM_HUMAN Uromodulin OS=Homo sapiens OX=9606 GN=UMOD PE=1 SV=1	1	20230315_zy_umod_g-after.16907.16907.4	controllerType=0 controllerNumber=1 scan=16907	64.0842
E.TC[+57.021]VPVLRC[+57.021]NTAAPMWLN[+2278.809]GTHPSSDE.G	HexNAc(5)Hex(6)NeuAc(1)	C[+57]*2, N[+2279]	1273.78	4	5092.1	5092.09	0	2	216	Specific	445.54	445.54	275.32	7.81	244	>sp|P07911|UROM_HUMAN Uromodulin OS=Homo sapiens OX=9606 GN=UMOD PE=1 SV=1	1	20230315_zy_umod_g-after.18121.18121.4	controllerType=0 controllerNumber=1 scan=18121	68.5675
E.TC[+57.021]VPVLRC[+57.021]NTAAPMWLN[+2278.809]GTHPSSDE.G	HexNAc(5)Hex(6)NeuAc(1)	C[+57]*2, N[+2279]	1273.78	4	5092.1	5092.09	0	2.8	216	Specific	456.61	456.61	133.77	7.32	244	>sp|P07911|UROM_HUMAN Uromodulin OS=Homo sapiens OX=9606 GN=UMOD PE=1 SV=1	1	20230315_zy_umod_g-after.18053.18053.4	controllerType=0 controllerNumber=1 scan=18053	68.3252
E.TC[+57.021]VPVLRC[+57.021]NTAAPMWLN[+2278.809]GTHPSSDE.G	HexNAc(5)Hex(6)NeuAc(1)	C[+57]*2, N[+2279]	1273.78	4	5092.09	5092.09	0	-0.7	216	Specific	467.67	467.67	293.84	7.44	244	>sp|P07911|UROM_HUMAN Uromodulin OS=Homo sapiens OX=9606 GN=UMOD PE=1 SV=1	1	20230315_zy_umod_g-after.18077.18077.4	controllerType=0 controllerNumber=1 scan=18077	68.409
E.TC[+57.021]VPVLRC[+57.021]NTAAPM[+15.995]WLN[+2569.905]GTHPSSDE.G	HexNAc(5)Hex(6)NeuAc(2)	C[+57]*2, M[+16], N[+2570]	1350.8	4	5400.16	5399.18	1	-3.4	216	Specific	245.51	245.51	245.51	5.92	244	>sp|P07911|UROM_HUMAN Uromodulin OS=Homo sapiens OX=9606 GN=UMOD PE=1 SV=1	1	20230315_zy_umod_g-after.18538.18538.4	controllerType=0 controllerNumber=1 scan=18538	70.0864
E.TC[+57.021]VPVLRC[+57.021]NTAAPM[+15.995]WLN[+2569.905]GTHPSSDE.G	HexNAc(5)Hex(6)NeuAc(2)	C[+57]*2, M[+16], N[+2570]	1350.3	4	5398.17	5399.18	-1	-0.8	216	Specific	257.96	257.96	257.96	5.7	244	>sp|P07911|UROM_HUMAN Uromodulin OS=Homo sapiens OX=9606 GN=UMOD PE=1 SV=1	1	20230315_zy_umod_g-after.18321.18321.4	controllerType=0 controllerNumber=1 scan=18321	69.2841
E.TC[+57.021]VPVLRC[+57.021]NTAAPMWLN[+2569.905]GTHPSSDE.G	HexNAc(5)Hex(6)NeuAc(2)	C[+57]*2, N[+2570]	1795.07	3	5383.19	5383.19	0	1.3	216	Specific	283.26	283.26	210.99	5.88	244	>sp|P07911|UROM_HUMAN Uromodulin OS=Homo sapiens OX=9606 GN=UMOD PE=1 SV=1	1	20230315_zy_umod_g-after.18698.18698.3	controllerType=0 controllerNumber=1 scan=18698	70.6573
E.TC[+57.021]VPVLRC[+57.021]NTAAPM[+15.995]WLN[+2569.905]GTHPSSDE.G	HexNAc(5)Hex(6)NeuAc(2)	C[+57]*2, M[+16], N[+2570]	1350.3	4	5398.17	5399.18	-1	-1.6	216	Specific	295.66	295.66	295.66	5.82	244	>sp|P07911|UROM_HUMAN Uromodulin OS=Homo sapiens OX=9606 GN=UMOD PE=1 SV=1	1	20230315_zy_umod_g-after.18257.18257.4	controllerType=0 controllerNumber=1 scan=18257	69.058
E.TC[+57.021]VPVLRC[+57.021]NTAAPM[+15.995]WLN[+2569.905]GTHPSSDE.G	HexNAc(5)Hex(6)NeuAc(2)	C[+57]*2, M[+16], N[+2570]	1350.55	4	5399.19	5399.18	0	2.1	216	Specific	457.19	457.19	144.03	7.81	244	>sp|P07911|UROM_HUMAN Uromodulin OS=Homo sapiens OX=9606 GN=UMOD PE=1 SV=1	1	20230315_zy_umod_g-after.17980.17980.4	controllerType=0 controllerNumber=1 scan=17980	68.0667
E.TC[+57.021]VPVLRC[+57.021]NTAAPM[+15.995]WLN[+2569.905]GTHPSSDE.G	HexNAc(5)Hex(6)NeuAc(2)	C[+57]*2, M[+16], N[+2570]	1350.55	4	5399.19	5399.18	0	2.2	216	Specific	462.19	462.19	313.57	7.81	244	>sp|P07911|UROM_HUMAN Uromodulin OS=Homo sapiens OX=9606 GN=UMOD PE=1 SV=1	1	20230315_zy_umod_g-after.18003.18003.4	controllerType=0 controllerNumber=1 scan=18003	68.1521
E.TC[+57.021]VPVLRC[+57.021]NTAAPM[+15.995]WLN[+2569.905]GTHPSSDE.G	HexNAc(5)Hex(6)NeuAc(2)	C[+57]*2, M[+16], N[+2570]	1350.55	4	5399.19	5399.18	0	1	216	Specific	468.66	468.66	284.76	7.81	244	>sp|P07911|UROM_HUMAN Uromodulin OS=Homo sapiens OX=9606 GN=UMOD PE=1 SV=1	1	20230315_zy_umod_g-after.17892.17892.4	controllerType=0 controllerNumber=1 scan=17892	67.7451
E.TC[+57.021]VPVLRC[+57.021]NTAAPM[+15.995]WLN[+2569.905]GTHPSSDE.G	HexNAc(5)Hex(6)NeuAc(2)	C[+57]*2, M[+16], N[+2570]	1350.55	4	5399.19	5399.18	0	2.1	216	Specific	497.46	497.46	166.54	7.86	244	>sp|P07911|UROM_HUMAN Uromodulin OS=Homo sapiens OX=9606 GN=UMOD PE=1 SV=1	1	20230315_zy_umod_g-after.17897.17897.4	controllerType=0 controllerNumber=1 scan=17897	67.7604
E.TC[+57.021]VPVLRC[+57.021]NTAAPMWLN[+2569.905]GTHPSSDE.G	HexNAc(5)Hex(6)NeuAc(2)	C[+57]*2, N[+2570]	1346.56	4	5383.2	5383.19	0	2.8	216	Specific	581.49	581.49	169.2	8.26	244	>sp|P07911|UROM_HUMAN Uromodulin OS=Homo sapiens OX=9606 GN=UMOD PE=1 SV=1	1	20230315_zy_umod_g-after.18688.18688.4	controllerType=0 controllerNumber=1 scan=18688	70.6157
E.TC[+57.021]VPVLRC[+57.021]NTAAPMWLN[+2569.905]GTHPSSDE.G	HexNAc(5)Hex(6)NeuAc(2)	C[+57]*2, N[+2570]	1346.55	4	5383.2	5383.19	0	1.9	216	Specific	599.64	599.64	376.42	8.75	244	>sp|P07911|UROM_HUMAN Uromodulin OS=Homo sapiens OX=9606 GN=UMOD PE=1 SV=1	1	20230315_zy_umod_g-after.18682.18682.4	controllerType=0 controllerNumber=1 scan=18682	70.5998
E.TC[+57.021]VPVLRC[+57.021]NTAAPM[+15.995]WLN[+2861.000]GTHPSSDE.G	HexNAc(5)Hex(6)NeuAc(3)	C[+57]*2, M[+16], N[+2861]	1423.32	4	5690.27	5690.28	0	-1	216	Specific	213.95	213.95	48.65	6.24	244	>sp|P07911|UROM_HUMAN Uromodulin OS=Homo sapiens OX=9606 GN=UMOD PE=1 SV=1	1	20230315_zy_umod_g-after.18970.18970.4	controllerType=0 controllerNumber=1 scan=18970	71.6436
E.TC[+57.021]VPVLRC[+57.021]NTAAPM[+15.995]WLN[+2861.000]GTHPSSDE.G	HexNAc(5)Hex(6)NeuAc(3)	C[+57]*2, M[+16], N[+2861]	1423.32	4	5690.26	5690.28	0	-3.4	216	Specific	221.41	221.41	221.41	5.99	244	>sp|P07911|UROM_HUMAN Uromodulin OS=Homo sapiens OX=9606 GN=UMOD PE=1 SV=1	1	20230315_zy_umod_g-after.18830.18830.4	controllerType=0 controllerNumber=1 scan=18830	71.131
E.TC[+57.021]VPVLRC[+57.021]NTAAPM[+15.995]WLN[+2861.000]GTHPSSDE.G	HexNAc(5)Hex(6)NeuAc(3)	C[+57]*2, M[+16], N[+2861]	1423.32	4	5690.26	5690.28	0	-2.4	216	Specific	240.36	240.36	111.41	5.92	244	>sp|P07911|UROM_HUMAN Uromodulin OS=Homo sapiens OX=9606 GN=UMOD PE=1 SV=1	1	20230315_zy_umod_g-after.18770.18770.4	controllerType=0 controllerNumber=1 scan=18770	70.9182
E.TC[+57.021]VPVLRC[+57.021]NTAAPMWLN[+2861.000]GTHPSSDE.G	HexNAc(5)Hex(6)NeuAc(3)	C[+57]*2, N[+2861]	1419.58	4	5675.3	5674.28	1	2.2	216	Specific	244.36	244.36	244.36	6.54	244	>sp|P07911|UROM_HUMAN Uromodulin OS=Homo sapiens OX=9606 GN=UMOD PE=1 SV=1	1	20230315_zy_umod_g-after.19562.19562.4	controllerType=0 controllerNumber=1 scan=19562	73.8513
E.TC[+57.021]VPVLRC[+57.021]NTAAPM[+15.995]WLN[+2861.000]GTHPSSDE.G	HexNAc(5)Hex(6)NeuAc(3)	C[+57]*2, M[+16], N[+2861]	1423.07	4	5689.27	5690.28	-1	-0.4	216	Specific	296.32	296.32	296.32	5.89	244	>sp|P07911|UROM_HUMAN Uromodulin OS=Homo sapiens OX=9606 GN=UMOD PE=1 SV=1	1	20230315_zy_umod_g-after.18462.18462.4	controllerType=0 controllerNumber=1 scan=18462	69.8015
E.TC[+57.021]VPVLRC[+57.021]NTAAPM[+15.995]WLN[+2861.000]GTHPSSDE.G	HexNAc(5)Hex(6)NeuAc(3)	C[+57]*2, M[+16], N[+2861]	1423.57	4	5691.26	5690.28	1	-3.8	216	Specific	309.07	309.07	309.07	5.54	244	>sp|P07911|UROM_HUMAN Uromodulin OS=Homo sapiens OX=9606 GN=UMOD PE=1 SV=1	1	20230315_zy_umod_g-after.18907.18907.4	controllerType=0 controllerNumber=1 scan=18907	71.4192
E.TC[+57.021]VPVLRC[+57.021]NTAAPM[+15.995]WLN[+2861.000]GTHPSSDE.G	HexNAc(5)Hex(6)NeuAc(3)	C[+57]*2, M[+16], N[+2861]	1423.57	4	5691.27	5690.28	1	-2.3	216	Specific	360.71	360.71	214.6	6.42	244	>sp|P07911|UROM_HUMAN Uromodulin OS=Homo sapiens OX=9606 GN=UMOD PE=1 SV=1	1	20230315_zy_umod_g-after.18825.18825.4	controllerType=0 controllerNumber=1 scan=18825	71.1177
E.TC[+57.021]VPVLRC[+57.021]NTAAPMWLN[+2861.000]GTHPSSDE.G	HexNAc(5)Hex(6)NeuAc(3)	C[+57]*2, N[+2861]	1419.33	4	5674.28	5674.28	0	0.8	216	Specific	368.8	368.8	368.8	6.86	244	>sp|P07911|UROM_HUMAN Uromodulin OS=Homo sapiens OX=9606 GN=UMOD PE=1 SV=1	1	20230315_zy_umod_g-after.19152.19152.4	controllerType=0 controllerNumber=1 scan=19152	72.3113
E.TC[+57.021]VPVLRC[+57.021]NTAAPMWLN[+2861.000]GTHPSSDE.G	HexNAc(5)Hex(6)NeuAc(3)	C[+57]*2, N[+2861]	1891.77	3	5673.28	5674.28	-1	1.4	216	Specific	382.22	382.22	382.22	6.73	244	>sp|P07911|UROM_HUMAN Uromodulin OS=Homo sapiens OX=9606 GN=UMOD PE=1 SV=1	1	20230315_zy_umod_g-after.19206.19206.3	controllerType=0 controllerNumber=1 scan=19206	72.508
E.TC[+57.021]VPVLRC[+57.021]NTAAPMWLN[+2861.000]GTHPSSDE.G	HexNAc(5)Hex(6)NeuAc(3)	C[+57]*2, N[+2861]	1135.66	5	5674.29	5674.28	0	1.3	216	Specific	392.93	392.93	392.93	6.98	244	>sp|P07911|UROM_HUMAN Uromodulin OS=Homo sapiens OX=9606 GN=UMOD PE=1 SV=1	1	20230315_zy_umod_g-after.19204.19204.5	controllerType=0 controllerNumber=1 scan=19204	72.5021
E.TC[+57.021]VPVLRC[+57.021]NTAAPMWLN[+2861.000]GTHPSSDE.G	HexNAc(5)Hex(6)NeuAc(3)	C[+57]*2, N[+2861]	1419.33	4	5674.29	5674.28	0	2.1	216	Specific	558.11	558.11	558.11	8.09	244	>sp|P07911|UROM_HUMAN Uromodulin OS=Homo sapiens OX=9606 GN=UMOD PE=1 SV=1	1	20230315_zy_umod_g-after.19244.19244.4	controllerType=0 controllerNumber=1 scan=19244	72.65
E.TC[+57.021]VPVLRC[+57.021]NTAAPMWLN[+2861.000]GTHPSSDE.G	HexNAc(5)Hex(6)NeuAc(3)	C[+57]*2, N[+2861]	1419.33	4	5674.29	5674.28	0	2	216	Specific	576.19	576.19	576.19	8.75	244	>sp|P07911|UROM_HUMAN Uromodulin OS=Homo sapiens OX=9606 GN=UMOD PE=1 SV=1	1	20230315_zy_umod_g-after.19249.19249.4	controllerType=0 controllerNumber=1 scan=19249	72.6632
E.TC[+57.021]VPVLRC[+57.021]NTAAPM[+15.995]WLN[+2861.000]GTHPSSDE.G	HexNAc(5)Hex(6)NeuAc(3)	C[+57]*2, M[+16], N[+2861]	1423.33	4	5690.28	5690.28	0	0.5	216	Specific	592.15	592.15	176.93	8.75	244	>sp|P07911|UROM_HUMAN Uromodulin OS=Homo sapiens OX=9606 GN=UMOD PE=1 SV=1	1	20230315_zy_umod_g-after.18532.18532.4	controllerType=0 controllerNumber=1 scan=18532	70.0586
E.TC[+57.021]VPVLRC[+57.021]NTAAPMWLN[+2861.000]GTHPSSDE.G	HexNAc(5)Hex(6)NeuAc(3)	C[+57]*2, N[+2861]	1419.33	4	5674.29	5674.28	0	1.7	216	Specific	622.66	622.66	622.66	9.75	244	>sp|P07911|UROM_HUMAN Uromodulin OS=Homo sapiens OX=9606 GN=UMOD PE=1 SV=1	1	20230315_zy_umod_g-after.19202.19202.4	controllerType=0 controllerNumber=1 scan=19202	72.4966
E.TC[+57.021]VPVLRC[+57.021]NTAAPMWLN[+2586.920]GTHPSSDE.G	HexNAc(5)Hex(7)Fuc(1)NeuAc(1)	C[+57]*2, N[+2587]	1350.81	4	5400.21	5400.2	0	2.6	216	Specific	201.47	201.47	201.47	6.04	244	>sp|P07911|UROM_HUMAN Uromodulin OS=Homo sapiens OX=9606 GN=UMOD PE=1 SV=1	1	20230315_zy_umod_g-after.18756.18756.4	controllerType=0 controllerNumber=1 scan=18756	70.8665
E.TC[+57.021]VPVLRC[+57.021]NTAAPMWLN[+2586.920]GTHPSSDE.G	HexNAc(5)Hex(7)Fuc(1)NeuAc(1)	C[+57]*2, N[+2587]	1350.81	4	5400.22	5400.2	0	3.7	216	Specific	286.13	286.13	286.13	5.64	244	>sp|P07911|UROM_HUMAN Uromodulin OS=Homo sapiens OX=9606 GN=UMOD PE=1 SV=1	1	20230315_zy_umod_g-after.18689.18689.4	controllerType=0 controllerNumber=1 scan=18689	70.6207
E.TC[+57.021]VPVLRC[+57.021]NTAAPM[+15.995]WLN[+2586.920]GTHPSSDE.G	HexNAc(5)Hex(7)Fuc(1)NeuAc(1)	C[+57]*2, M[+16], N[+2587]	1354.81	4	5416.22	5416.2	0	3.8	216	Specific	312.53	312.53	312.53	5.8	244	>sp|P07911|UROM_HUMAN Uromodulin OS=Homo sapiens OX=9606 GN=UMOD PE=1 SV=1	1	20230315_zy_umod_g-after.17960.17960.4	controllerType=0 controllerNumber=1 scan=17960	67.9974
E.TC[+57.021]VPVLRC[+57.021]NTAAPM[+15.995]WLN[+2878.015]GTHPSSDE.G	HexNAc(5)Hex(7)Fuc(1)NeuAc(2)	C[+57]*2, M[+16], N[+2878]	1427.33	4	5706.3	5707.29	-1	2.6	216	Specific	234.98	234.98	234.98	5.64	244	>sp|P07911|UROM_HUMAN Uromodulin OS=Homo sapiens OX=9606 GN=UMOD PE=1 SV=1	1	20230315_zy_umod_g-after.18576.18576.4	controllerType=0 controllerNumber=1 scan=18576	70.2195
E.TC[+57.021]VPVLRC[+57.021]NTAAPMWLN[+2878.015]GTHPSSDE.G	HexNAc(5)Hex(7)Fuc(1)NeuAc(2)	C[+57]*2, N[+2878]	1423.58	4	5691.31	5691.3	0	2.5	216	Specific	272.4	272.4	78.31	6.09	244	>sp|P07911|UROM_HUMAN Uromodulin OS=Homo sapiens OX=9606 GN=UMOD PE=1 SV=1	1	20230315_zy_umod_g-after.19257.19257.4	controllerType=0 controllerNumber=1 scan=19257	72.697
E.TC[+57.021]VPVLRC[+57.021]NTAAPM[+15.995]WLN[+2878.015]GTHPSSDE.G	HexNAc(5)Hex(7)Fuc(1)NeuAc(2)	C[+57]*2, M[+16], N[+2878]	1427.57	4	5707.26	5707.29	0	-5.6	216	Specific	299.24	299.24	299.24	5.65	244	>sp|P07911|UROM_HUMAN Uromodulin OS=Homo sapiens OX=9606 GN=UMOD PE=1 SV=1	1	20230315_zy_umod_g-after.16997.16997.4	controllerType=0 controllerNumber=1 scan=16997	64.4086
E.TC[+57.021]VPVLRC[+57.021]NTAAPMWLN[+1704.635]GTHPSSDE.G	HexNAc(6)Hex(3)	C[+57]*2, N[+1705]	1130.23	4	4517.92	4517.92	0	0.4	216	Specific	206.92	206.92	206.92	6.61	244	>sp|P07911|UROM_HUMAN Uromodulin OS=Homo sapiens OX=9606 GN=UMOD PE=1 SV=1	1	20230315_zy_umod_g-after.17416.17416.4	controllerType=0 controllerNumber=1 scan=17416	65.9601
E.TC[+57.021]VPVLRC[+57.021]NTAAPM[+15.995]WLN[+1704.635]GTHPSSDE.G	HexNAc(6)Hex(3)	C[+57]*2, M[+16], N[+1705]	1511.97	3	4533.91	4533.91	0	0.1	216	Specific	262.91	262.91	262.91	5.91	244	>sp|P07911|UROM_HUMAN Uromodulin OS=Homo sapiens OX=9606 GN=UMOD PE=1 SV=1	1	20230315_zy_umod_g-after.15600.15600.3	controllerType=0 controllerNumber=1 scan=15600	59.1937
E.TC[+57.021]VPVLRC[+57.021]NTAAPM[+15.995]WLN[+1704.635]GTHPSSDE.G	HexNAc(6)Hex(3)	C[+57]*2, M[+16], N[+1705]	1511.98	3	4533.92	4533.91	0	1.4	216	Specific	264.33	264.33	264.33	5.91	244	>sp|P07911|UROM_HUMAN Uromodulin OS=Homo sapiens OX=9606 GN=UMOD PE=1 SV=1	1	20230315_zy_umod_g-after.15654.15654.3	controllerType=0 controllerNumber=1 scan=15654	59.3934
E.TC[+57.021]VPVLRC[+57.021]NTAAPM[+15.995]WLN[+1704.635]GTHPSSDE.G	HexNAc(6)Hex(3)	C[+57]*2, M[+16], N[+1705]	1134.23	4	4533.91	4533.91	0	0.9	216	Specific	313.19	313.19	313.19	6.72	244	>sp|P07911|UROM_HUMAN Uromodulin OS=Homo sapiens OX=9606 GN=UMOD PE=1 SV=1	1	20230315_zy_umod_g-after.15598.15598.4	controllerType=0 controllerNumber=1 scan=15598	59.1874
E.TC[+57.021]VPVLRC[+57.021]NTAAPMWLN[+1704.635]GTHPSSDE.G	HexNAc(6)Hex(3)	C[+57]*2, N[+1705]	1506.64	3	4517.92	4517.92	0	0.3	216	Specific	546.35	546.35	546.35	7.42	244	>sp|P07911|UROM_HUMAN Uromodulin OS=Homo sapiens OX=9606 GN=UMOD PE=1 SV=1	1	20230315_zy_umod_g-after.17438.17438.3	controllerType=0 controllerNumber=1 scan=17438	66.0439
E.TC[+57.021]VPVLRC[+57.021]NTAAPMWLN[+1704.635]GTHPSSDE.G	HexNAc(6)Hex(3)	C[+57]*2, N[+1705]	1130.23	4	4517.92	4517.92	0	0.3	216	Specific	550.05	550.05	550.05	8.09	244	>sp|P07911|UROM_HUMAN Uromodulin OS=Homo sapiens OX=9606 GN=UMOD PE=1 SV=1	1	20230315_zy_umod_g-after.17437.17437.4	controllerType=0 controllerNumber=1 scan=17437	66.0416
E.TC[+57.021]VPVLRC[+57.021]NTAAPM[+15.995]WLN[+1850.693]GTHPSSDE.G	HexNAc(6)Hex(3)Fuc(1)	C[+57]*2, M[+16], N[+1851]	1170.75	4	4679.97	4679.97	0	1	216	Specific	258.47	258.47	50.18	6.54	244	>sp|P07911|UROM_HUMAN Uromodulin OS=Homo sapiens OX=9606 GN=UMOD PE=1 SV=1	1	20230315_zy_umod_g-after.15243.15243.5	controllerType=0 controllerNumber=1 scan=15243	57.8755
E.TC[+57.021]VPVLRC[+57.021]NTAAPMWLN[+1850.693]GTHPSSDE.G	HexNAc(6)Hex(3)Fuc(1)	C[+57]*2, N[+1851]	1166.75	4	4663.98	4663.97	0	1.1	216	Specific	267.63	267.63	267.63	6.58	244	>sp|P07911|UROM_HUMAN Uromodulin OS=Homo sapiens OX=9606 GN=UMOD PE=1 SV=1	1	20230315_zy_umod_g-after.17342.17342.4	controllerType=0 controllerNumber=1 scan=17342	65.6943
E.TC[+57.021]VPVLRC[+57.021]NTAAPM[+15.995]WLN[+1850.693]GTHPSSDE.G	HexNAc(6)Hex(3)Fuc(1)	C[+57]*2, M[+16], N[+1851]	1170.5	4	4678.97	4679.97	-1	0.5	216	Specific	299.75	299.75	201.99	6.26	244	>sp|P07911|UROM_HUMAN Uromodulin OS=Homo sapiens OX=9606 GN=UMOD PE=1 SV=1	1	20230315_zy_umod_g-after.15335.15335.4	controllerType=0 controllerNumber=1 scan=15335	58.2207
E.TC[+57.021]VPVLRC[+57.021]NTAAPMWLN[+1850.693]GTHPSSDE.G	HexNAc(6)Hex(3)Fuc(1)	C[+57]*2, N[+1851]	1166.75	4	4663.97	4663.97	0	0.2	216	Specific	304.45	304.45	304.45	6.72	244	>sp|P07911|UROM_HUMAN Uromodulin OS=Homo sapiens OX=9606 GN=UMOD PE=1 SV=1	1	20230315_zy_umod_g-after.17354.17354.4	controllerType=0 controllerNumber=1 scan=17354	65.7388
E.TC[+57.021]VPVLRC[+57.021]NTAAPMWLN[+1850.693]GTHPSSDE.G	HexNAc(6)Hex(3)Fuc(1)	C[+57]*2, N[+1851]	1555.33	3	4663.98	4663.97	0	2.3	216	Specific	316	316	316	6.05	244	>sp|P07911|UROM_HUMAN Uromodulin OS=Homo sapiens OX=9606 GN=UMOD PE=1 SV=1	1	20230315_zy_umod_g-after.17235.17235.3	controllerType=0 controllerNumber=1 scan=17235	65.2986
E.TC[+57.021]VPVLRC[+57.021]NTAAPMWLN[+1850.693]GTHPSSDE.G	HexNAc(6)Hex(3)Fuc(1)	C[+57]*2, N[+1851]	1555.33	3	4663.99	4663.97	0	3	216	Specific	380.91	380.91	380.91	6.7	244	>sp|P07911|UROM_HUMAN Uromodulin OS=Homo sapiens OX=9606 GN=UMOD PE=1 SV=1	1	20230315_zy_umod_g-after.17217.17217.3	controllerType=0 controllerNumber=1 scan=17217	65.2306
E.TC[+57.021]VPVLRC[+57.021]NTAAPMWLN[+1850.693]GTHPSSDE.G	HexNAc(6)Hex(3)Fuc(1)	C[+57]*2, N[+1851]	1555.33	3	4663.97	4663.97	0	0.2	216	Specific	413.73	413.73	413.73	7.11	244	>sp|P07911|UROM_HUMAN Uromodulin OS=Homo sapiens OX=9606 GN=UMOD PE=1 SV=1	1	20230315_zy_umod_g-after.17353.17353.3	controllerType=0 controllerNumber=1 scan=17353	65.7355
E.TC[+57.021]VPVLRC[+57.021]NTAAPMWLN[+1850.693]GTHPSSDE.G	HexNAc(6)Hex(3)Fuc(1)	C[+57]*2, N[+1851]	1555.33	3	4663.98	4663.97	0	1.1	216	Specific	483.92	483.92	483.92	7.19	244	>sp|P07911|UROM_HUMAN Uromodulin OS=Homo sapiens OX=9606 GN=UMOD PE=1 SV=1	1	20230315_zy_umod_g-after.17246.17246.3	controllerType=0 controllerNumber=1 scan=17246	65.3401
E.TC[+57.021]VPVLRC[+57.021]NTAAPMWLN[+1850.693]GTHPSSDE.G	HexNAc(6)Hex(3)Fuc(1)	C[+57]*2, N[+1851]	1166.75	4	4663.98	4663.97	0	0.8	216	Specific	512.55	512.55	512.55	7.86	244	>sp|P07911|UROM_HUMAN Uromodulin OS=Homo sapiens OX=9606 GN=UMOD PE=1 SV=1	1	20230315_zy_umod_g-after.17245.17245.4	controllerType=0 controllerNumber=1 scan=17245	65.3372
E.TC[+57.021]VPVLRC[+57.021]NTAAPM[+15.995]WLN[+2141.788]GTHPSSDE.G	HexNAc(6)Hex(3)Fuc(1)NeuAc(1)	C[+57]*2, M[+16], N[+2142]	1243.77	4	4972.06	4971.06	1	-1.2	216	Specific	203.66	203.66	35.69	6.09	244	>sp|P07911|UROM_HUMAN Uromodulin OS=Homo sapiens OX=9606 GN=UMOD PE=1 SV=1	1	20230315_zy_umod_g-after.16802.16802.4	controllerType=0 controllerNumber=1 scan=16802	63.6968
E.TC[+57.021]VPVLRC[+57.021]NTAAPM[+15.995]WLN[+2141.788]GTHPSSDE.G	HexNAc(6)Hex(3)Fuc(1)NeuAc(1)	C[+57]*2, M[+16], N[+2142]	1243.52	4	4971.07	4971.06	0	1.5	216	Specific	292.7	292.7	226.82	6.72	244	>sp|P07911|UROM_HUMAN Uromodulin OS=Homo sapiens OX=9606 GN=UMOD PE=1 SV=1	1	20230315_zy_umod_g-after.16780.16780.4	controllerType=0 controllerNumber=1 scan=16780	63.6181
E.TC[+57.021]VPVLRC[+57.021]NTAAPM[+15.995]WLN[+2141.788]GTHPSSDE.G	HexNAc(6)Hex(3)Fuc(1)NeuAc(1)	C[+57]*2, M[+16], N[+2142]	1657.69	3	4971.07	4971.06	0	1.4	216	Specific	309.01	309.01	146.48	6.05	244	>sp|P07911|UROM_HUMAN Uromodulin OS=Homo sapiens OX=9606 GN=UMOD PE=1 SV=1	1	20230315_zy_umod_g-after.16725.16725.3	controllerType=0 controllerNumber=1 scan=16725	63.4147
E.TC[+57.021]VPVLRC[+57.021]NTAAPM[+15.995]WLN[+2141.788]GTHPSSDE.G	HexNAc(6)Hex(3)Fuc(1)NeuAc(1)	C[+57]*2, M[+16], N[+2142]	1243.52	4	4971.07	4971.06	0	0.7	216	Specific	339.65	339.65	98.73	6.75	244	>sp|P07911|UROM_HUMAN Uromodulin OS=Homo sapiens OX=9606 GN=UMOD PE=1 SV=1	1	20230315_zy_umod_g-after.16787.16787.4	controllerType=0 controllerNumber=1 scan=16787	63.6411
E.TC[+57.021]VPVLRC[+57.021]NTAAPM[+15.995]WLN[+2141.788]GTHPSSDE.G	HexNAc(6)Hex(3)Fuc(1)NeuAc(1)	C[+57]*2, M[+16], N[+2142]	1243.52	4	4971.06	4971.06	0	-0.2	216	Specific	412.75	412.75	243.92	7.41	244	>sp|P07911|UROM_HUMAN Uromodulin OS=Homo sapiens OX=9606 GN=UMOD PE=1 SV=1	1	20230315_zy_umod_g-after.16698.16698.4	controllerType=0 controllerNumber=1 scan=16698	63.3164
E.TC[+57.021]VPVLRC[+57.021]NTAAPM[+15.995]WLN[+2141.788]GTHPSSDE.G	HexNAc(6)Hex(3)Fuc(1)NeuAc(1)	C[+57]*2, M[+16], N[+2142]	1243.52	4	4971.06	4971.06	0	0	216	Specific	414.66	414.66	178.31	7.41	244	>sp|P07911|UROM_HUMAN Uromodulin OS=Homo sapiens OX=9606 GN=UMOD PE=1 SV=1	1	20230315_zy_umod_g-after.16703.16703.4	controllerType=0 controllerNumber=1 scan=16703	63.3331
E.TC[+57.021]VPVLRC[+57.021]NTAAPMWLN[+2141.788]GTHPSSDE.G	HexNAc(6)Hex(3)Fuc(1)NeuAc(1)	C[+57]*2, N[+2142]	1652.36	3	4955.08	4955.07	0	1.6	216	Specific	437.27	437.27	437.27	7.11	244	>sp|P07911|UROM_HUMAN Uromodulin OS=Homo sapiens OX=9606 GN=UMOD PE=1 SV=1	1	20230315_zy_umod_g-after.18057.18057.3	controllerType=0 controllerNumber=1 scan=18057	68.3432
E.TC[+57.021]VPVLRC[+57.021]NTAAPMWLN[+2141.788]GTHPSSDE.G	HexNAc(6)Hex(3)Fuc(1)NeuAc(1)	C[+57]*2, N[+2142]	1239.53	4	4955.09	4955.07	0	4.4	216	Specific	482.92	482.92	482.92	6.95	244	>sp|P07911|UROM_HUMAN Uromodulin OS=Homo sapiens OX=9606 GN=UMOD PE=1 SV=1	1	20230315_zy_umod_g-after.18087.18087.5	controllerType=0 controllerNumber=1 scan=18087	68.442
E.TC[+57.021]VPVLRC[+57.021]NTAAPMWLN[+2141.788]GTHPSSDE.G	HexNAc(6)Hex(3)Fuc(1)NeuAc(1)	C[+57]*2, N[+2142]	1239.52	4	4955.08	4955.07	0	1.9	216	Specific	499.98	499.98	499.98	7.86	244	>sp|P07911|UROM_HUMAN Uromodulin OS=Homo sapiens OX=9606 GN=UMOD PE=1 SV=1	1	20230315_zy_umod_g-after.18076.18076.4	controllerType=0 controllerNumber=1 scan=18076	68.4067
E.TC[+57.021]VPVLRC[+57.021]NTAAPMWLN[+2141.788]GTHPSSDE.G	HexNAc(6)Hex(3)Fuc(1)NeuAc(1)	C[+57]*2, N[+2142]	1652.36	3	4955.07	4955.07	0	0.6	216	Specific	628.52	628.52	628.52	9.08	244	>sp|P07911|UROM_HUMAN Uromodulin OS=Homo sapiens OX=9606 GN=UMOD PE=1 SV=1	1	20230315_zy_umod_g-after.18065.18065.3	controllerType=0 controllerNumber=1 scan=18065	68.3634
E.TC[+57.021]VPVLRC[+57.021]NTAAPM[+15.995]WLN[+2432.884]GTHPSSDE.G	HexNAc(6)Hex(3)Fuc(1)NeuAc(2)	C[+57]*2, M[+16], N[+2433]	1316.3	4	5262.16	5262.16	0	0.7	216	Specific	209.41	209.41	209.41	4.6	244	>sp|P07911|UROM_HUMAN Uromodulin OS=Homo sapiens OX=9606 GN=UMOD PE=1 SV=1	1	20230315_zy_umod_g-after.15060.15060.4	controllerType=0 controllerNumber=1 scan=15060	57.2031
E.TC[+57.021]VPVLRC[+57.021]NTAAPM[+15.995]WLN[+2432.884]GTHPSSDE.G	HexNAc(6)Hex(3)Fuc(1)NeuAc(2)	C[+57]*2, M[+16], N[+2433]	1316.3	4	5262.16	5262.16	0	0.9	216	Specific	257.93	257.93	257.93	6.54	244	>sp|P07911|UROM_HUMAN Uromodulin OS=Homo sapiens OX=9606 GN=UMOD PE=1 SV=1	1	20230315_zy_umod_g-after.15185.15185.4	controllerType=0 controllerNumber=1 scan=15185	57.6617
E.TC[+57.021]VPVLRC[+57.021]NTAAPM[+15.995]WLN[+2432.884]GTHPSSDE.G	HexNAc(6)Hex(3)Fuc(1)NeuAc(2)	C[+57]*2, M[+16], N[+2433]	1316.3	4	5262.16	5262.16	0	0.2	216	Specific	295.25	295.25	295.25	6.72	244	>sp|P07911|UROM_HUMAN Uromodulin OS=Homo sapiens OX=9606 GN=UMOD PE=1 SV=1	1	20230315_zy_umod_g-after.18817.18817.4	controllerType=0 controllerNumber=1 scan=18817	71.0853
E.TC[+57.021]VPVLRC[+57.021]NTAAPMWLN[+2012.745]GTHPSSDE.G	HexNAc(6)Hex(4)Fuc(1)	C[+57]*2, N[+2013]	1207.01	4	4825.01	4826.03	-1	-3.2	216	Specific	227.34	227.34	227.34	5.53	244	>sp|P07911|UROM_HUMAN Uromodulin OS=Homo sapiens OX=9606 GN=UMOD PE=1 SV=1	1	20230315_zy_umod_g-after.17193.17193.4	controllerType=0 controllerNumber=1 scan=17193	65.1358
E.TC[+57.021]VPVLRC[+57.021]NTAAPMWLN[+2012.745]GTHPSSDE.G	HexNAc(6)Hex(4)Fuc(1)	C[+57]*2, N[+2013]	1207.01	4	4825.01	4826.03	-1	-3.3	216	Specific	256.75	256.75	256.75	5.45	244	>sp|P07911|UROM_HUMAN Uromodulin OS=Homo sapiens OX=9606 GN=UMOD PE=1 SV=1	1	20230315_zy_umod_g-after.17096.17096.4	controllerType=0 controllerNumber=1 scan=17096	64.7752
E.TC[+57.021]VPVLRC[+57.021]NTAAPMWLN[+2012.745]GTHPSSDE.G	HexNAc(6)Hex(4)Fuc(1)	C[+57]*2, N[+2013]	1207.01	4	4825.01	4826.03	-1	-2.5	216	Specific	272.51	272.51	272.51	3.06	244	>sp|P07911|UROM_HUMAN Uromodulin OS=Homo sapiens OX=9606 GN=UMOD PE=1 SV=1	1	20230315_zy_umod_g-after.14163.14163.4	controllerType=0 controllerNumber=1 scan=14163	53.8076
E.TC[+57.021]VPVLRC[+57.021]NTAAPMWLN[+2012.745]GTHPSSDE.G	HexNAc(6)Hex(4)Fuc(1)	C[+57]*2, N[+2013]	1207.01	4	4825.01	4826.03	-1	-2.1	216	Specific	317.95	317.95	317.95	3.36	244	>sp|P07911|UROM_HUMAN Uromodulin OS=Homo sapiens OX=9606 GN=UMOD PE=1 SV=1	1	20230315_zy_umod_g-after.14079.14079.4	controllerType=0 controllerNumber=1 scan=14079	53.5015
E.TC[+57.021]VPVLRC[+57.021]NTAAPMWLN[+2157.783]GTHPSSDE.G	HexNAc(6)Hex(4)NeuAc(1)	C[+57]*2, N[+2158]	1243.52	4	4971.07	4971.06	0	0.6	216	Specific	202.62	202.62	50.52	6.52	244	>sp|P07911|UROM_HUMAN Uromodulin OS=Homo sapiens OX=9606 GN=UMOD PE=1 SV=1	1	20230315_zy_umod_g-after.14024.14024.4	controllerType=0 controllerNumber=1 scan=14024	53.2958
E.TC[+57.021]VPVLRC[+57.021]NTAAPMWLN[+2157.783]GTHPSSDE.G	HexNAc(6)Hex(4)NeuAc(1)	C[+57]*2, N[+2158]	1243.27	4	4970.07	4971.06	-1	1.5	216	Specific	208.79	208.79	127.04	6.15	244	>sp|P07911|UROM_HUMAN Uromodulin OS=Homo sapiens OX=9606 GN=UMOD PE=1 SV=1	1	20230315_zy_umod_g-after.18290.18290.4	controllerType=0 controllerNumber=1 scan=18290	69.1732
E.TC[+57.021]VPVLRC[+57.021]NTAAPMWLN[+2157.783]GTHPSSDE.G	HexNAc(6)Hex(4)NeuAc(1)	C[+57]*2, N[+2158]	1243.52	4	4971.07	4971.06	0	0.7	216	Specific	210.6	210.6	28.4	6.61	244	>sp|P07911|UROM_HUMAN Uromodulin OS=Homo sapiens OX=9606 GN=UMOD PE=1 SV=1	1	20230315_zy_umod_g-after.13871.13871.4	controllerType=0 controllerNumber=1 scan=13871	52.7288
E.TC[+57.021]VPVLRC[+57.021]NTAAPM[+15.995]WLN[+2157.783]GTHPSSDE.G	HexNAc(6)Hex(4)NeuAc(1)	C[+57]*2, M[+16], N[+2158]	1247.52	4	4987.06	4987.06	0	-0.6	216	Specific	222.93	222.93	209.69	6.24	244	>sp|P07911|UROM_HUMAN Uromodulin OS=Homo sapiens OX=9606 GN=UMOD PE=1 SV=1	1	20230315_zy_umod_g-after.17311.17311.4	controllerType=0 controllerNumber=1 scan=17311	65.5811
E.TC[+57.021]VPVLRC[+57.021]NTAAPMWLN[+2157.783]GTHPSSDE.G	HexNAc(6)Hex(4)NeuAc(1)	C[+57]*2, N[+2158]	1243.52	4	4971.07	4971.06	0	1.5	216	Specific	275.18	275.18	48.84	4.84	244	>sp|P07911|UROM_HUMAN Uromodulin OS=Homo sapiens OX=9606 GN=UMOD PE=1 SV=1	1	20230315_zy_umod_g-after.14204.14204.4	controllerType=0 controllerNumber=1 scan=14204	53.9593
E.TC[+57.021]VPVLRC[+57.021]NTAAPMWLN[+2157.783]GTHPSSDE.G	HexNAc(6)Hex(4)NeuAc(1)	C[+57]*2, N[+2158]	1243.52	4	4971.07	4971.06	0	0.7	216	Specific	319.17	319.17	63.06	4.7	244	>sp|P07911|UROM_HUMAN Uromodulin OS=Homo sapiens OX=9606 GN=UMOD PE=1 SV=1	1	20230315_zy_umod_g-after.13748.13748.4	controllerType=0 controllerNumber=1 scan=13748	52.2649
E.TC[+57.021]VPVLRC[+57.021]NTAAPMWLN[+2157.783]GTHPSSDE.G	HexNAc(6)Hex(4)NeuAc(1)	C[+57]*2, N[+2158]	1243.52	4	4971.06	4971.06	0	0.1	216	Specific	359.97	359.97	50.77	6.83	244	>sp|P07911|UROM_HUMAN Uromodulin OS=Homo sapiens OX=9606 GN=UMOD PE=1 SV=1	1	20230315_zy_umod_g-after.13666.13666.4	controllerType=0 controllerNumber=1 scan=13666	51.9561
E.TC[+57.021]VPVLRC[+57.021]NTAAPMWLN[+2157.783]GTHPSSDE.G	HexNAc(6)Hex(4)NeuAc(1)	C[+57]*2, N[+2158]	1243.52	4	4971.07	4971.06	0	0.5	216	Specific	400.55	400.55	136.59	7.78	244	>sp|P07911|UROM_HUMAN Uromodulin OS=Homo sapiens OX=9606 GN=UMOD PE=1 SV=1	1	20230315_zy_umod_g-after.18271.18271.4	controllerType=0 controllerNumber=1 scan=18271	69.1038
E.TC[+57.021]VPVLRC[+57.021]NTAAPMWLN[+2465.894]GTHPSSDE.G	HexNAc(6)Hex(5)Fuc(1)NeuAc(1)	C[+57]*2, N[+2466]	1320.55	4	5279.17	5279.17	0	-0.8	216	Specific	210.03	210.03	210.03	6.24	244	>sp|P07911|UROM_HUMAN Uromodulin OS=Homo sapiens OX=9606 GN=UMOD PE=1 SV=1	1	20230315_zy_umod_g-after.17989.17989.4	controllerType=0 controllerNumber=1 scan=17989	68.1
E.TC[+57.021]VPVLRC[+57.021]NTAAPMWLN[+2465.894]GTHPSSDE.G	HexNAc(6)Hex(5)Fuc(1)NeuAc(1)	C[+57]*2, N[+2466]	1320.3	4	5278.16	5279.17	-1	-1.8	216	Specific	217.76	217.76	217.76	5.71	244	>sp|P07911|UROM_HUMAN Uromodulin OS=Homo sapiens OX=9606 GN=UMOD PE=1 SV=1	1	20230315_zy_umod_g-after.15688.15688.4	controllerType=0 controllerNumber=1 scan=15688	59.5152
E.TC[+57.021]VPVLRC[+57.021]NTAAPMWLN[+2465.894]GTHPSSDE.G	HexNAc(6)Hex(5)Fuc(1)NeuAc(1)	C[+57]*2, N[+2466]	1320.55	4	5279.18	5279.17	0	0.2	216	Specific	292.19	292.19	292.19	6.72	244	>sp|P07911|UROM_HUMAN Uromodulin OS=Homo sapiens OX=9606 GN=UMOD PE=1 SV=1	1	20230315_zy_umod_g-after.18000.18000.4	controllerType=0 controllerNumber=1 scan=18000	68.1428
E.TC[+57.021]VPVLRC[+57.021]NTAAPM[+15.995]WLN[+2756.989]GTHPSSDE.G	HexNAc(6)Hex(5)Fuc(1)NeuAc(2)	C[+57]*2, M[+16], N[+2757]	1397.33	4	5586.29	5586.26	0	4	216	Specific	227.14	227.14	26.45	5.69	244	>sp|P07911|UROM_HUMAN Uromodulin OS=Homo sapiens OX=9606 GN=UMOD PE=1 SV=1	1	20230315_zy_umod_g-after.17966.17966.4	controllerType=0 controllerNumber=1 scan=17966	68.016
E.TC[+57.021]VPVLRC[+57.021]NTAAPM[+15.995]WLN[+2756.989]GTHPSSDE.G	HexNAc(6)Hex(5)Fuc(1)NeuAc(2)	C[+57]*2, M[+16], N[+2757]	1397.07	4	5585.25	5586.26	-1	-1.4	216	Specific	333.82	333.82	100.93	5.86	244	>sp|P07911|UROM_HUMAN Uromodulin OS=Homo sapiens OX=9606 GN=UMOD PE=1 SV=1	1	20230315_zy_umod_g-after.17799.17799.4	controllerType=0 controllerNumber=1 scan=17799	67.4041
E.TC[+57.021]VPVLRC[+57.021]NTAAPMWLN[+2756.989]GTHPSSDE.G	HexNAc(6)Hex(5)Fuc(1)NeuAc(2)	C[+57]*2, N[+2757]	1393.32	4	5570.27	5570.27	0	0.7	216	Specific	362.09	362.09	362.09	6.86	244	>sp|P07911|UROM_HUMAN Uromodulin OS=Homo sapiens OX=9606 GN=UMOD PE=1 SV=1	1	20230315_zy_umod_g-after.18596.18596.4	controllerType=0 controllerNumber=1 scan=18596	70.2978
E.TC[+57.021]VPVLRC[+57.021]NTAAPM[+15.995]WLN[+2756.989]GTHPSSDE.G	HexNAc(6)Hex(5)Fuc(1)NeuAc(2)	C[+57]*2, M[+16], N[+2757]	1397.32	4	5586.26	5586.26	0	-0.1	216	Specific	395.23	395.23	182.48	7.5	244	>sp|P07911|UROM_HUMAN Uromodulin OS=Homo sapiens OX=9606 GN=UMOD PE=1 SV=1	1	20230315_zy_umod_g-after.17710.17710.4	controllerType=0 controllerNumber=1 scan=17710	67.0751
E.TC[+57.021]VPVLRC[+57.021]NTAAPM[+15.995]WLN[+2756.989]GTHPSSDE.G	HexNAc(6)Hex(5)Fuc(1)NeuAc(2)	C[+57]*2, M[+16], N[+2757]	1397.32	4	5586.26	5586.26	0	-0.5	216	Specific	421.67	421.67	99.81	7.41	244	>sp|P07911|UROM_HUMAN Uromodulin OS=Homo sapiens OX=9606 GN=UMOD PE=1 SV=1	1	20230315_zy_umod_g-after.17703.17703.4	controllerType=0 controllerNumber=1 scan=17703	67.048
E.TC[+57.021]VPVLRC[+57.021]NTAAPM[+15.995]WLN[+3048.084]GTHPSSDE.G	HexNAc(6)Hex(5)Fuc(1)NeuAc(3)	C[+57]*2, M[+16], N[+3048]	1470.1	4	5877.36	5877.36	0	0.4	216	Specific	240.05	240.05	240.05	6.54	244	>sp|P07911|UROM_HUMAN Uromodulin OS=Homo sapiens OX=9606 GN=UMOD PE=1 SV=1	1	20230315_zy_umod_g-after.19236.19236.4	controllerType=0 controllerNumber=1 scan=19236	72.6181
E.TC[+57.021]VPVLRC[+57.021]NTAAPM[+15.995]WLN[+3048.084]GTHPSSDE.G	HexNAc(6)Hex(5)Fuc(1)NeuAc(3)	C[+57]*2, M[+16], N[+3048]	1470.1	4	5877.36	5877.36	0	0.9	216	Specific	241.12	241.12	241.12	6.54	244	>sp|P07911|UROM_HUMAN Uromodulin OS=Homo sapiens OX=9606 GN=UMOD PE=1 SV=1	1	20230315_zy_umod_g-after.16417.16417.4	controllerType=0 controllerNumber=1 scan=16417	62.2467
E.TC[+57.021]VPVLRC[+57.021]NTAAPM[+15.995]WLN[+3048.084]GTHPSSDE.G	HexNAc(6)Hex(5)Fuc(1)NeuAc(3)	C[+57]*2, M[+16], N[+3048]	1469.84	4	5876.34	5877.36	-1	-2.8	216	Specific	278.3	278.3	278.3	5.5	244	>sp|P07911|UROM_HUMAN Uromodulin OS=Homo sapiens OX=9606 GN=UMOD PE=1 SV=1	1	20230315_zy_umod_g-after.18339.18339.4	controllerType=0 controllerNumber=1 scan=18339	69.3498
E.TC[+57.021]VPVLRC[+57.021]NTAAPM[+15.995]WLN[+3048.084]GTHPSSDE.G	HexNAc(6)Hex(5)Fuc(1)NeuAc(3)	C[+57]*2, M[+16], N[+3048]	1470.1	4	5877.37	5877.36	0	1.7	216	Specific	278.82	278.82	278.82	6.58	244	>sp|P07911|UROM_HUMAN Uromodulin OS=Homo sapiens OX=9606 GN=UMOD PE=1 SV=1	1	20230315_zy_umod_g-after.16487.16487.4	controllerType=0 controllerNumber=1 scan=16487	62.5099
E.TC[+57.021]VPVLRC[+57.021]NTAAPM[+15.995]WLN[+3048.084]GTHPSSDE.G	HexNAc(6)Hex(5)Fuc(1)NeuAc(3)	C[+57]*2, M[+16], N[+3048]	1470.1	4	5877.37	5877.36	0	1.2	216	Specific	306.95	306.95	306.95	6.72	244	>sp|P07911|UROM_HUMAN Uromodulin OS=Homo sapiens OX=9606 GN=UMOD PE=1 SV=1	1	20230315_zy_umod_g-after.16568.16568.4	controllerType=0 controllerNumber=1 scan=16568	62.8163
E.TC[+57.021]VPVLRC[+57.021]NTAAPMWLN[+2336.851]GTHPSSDE.G	HexNAc(6)Hex(6)Fuc(1)	C[+57]*2, N[+2337]	1288.04	4	5149.12	5150.13	-1	-0.9	216	Specific	285.79	285.79	285.79	5.72	244	>sp|P07911|UROM_HUMAN Uromodulin OS=Homo sapiens OX=9606 GN=UMOD PE=1 SV=1	1	20230315_zy_umod_g-after.13899.13899.4	controllerType=0 controllerNumber=1 scan=13899	52.8315
E.TC[+57.021]VPVLRC[+57.021]NTAAPMWLN[+2627.947]GTHPSSDE.G	HexNAc(6)Hex(6)Fuc(1)NeuAc(1)	C[+57]*2, N[+2628]	1360.81	4	5440.21	5441.23	-1	-1.8	216	Specific	245.46	245.46	245.46	5.64	244	>sp|P07911|UROM_HUMAN Uromodulin OS=Homo sapiens OX=9606 GN=UMOD PE=1 SV=1	1	20230315_zy_umod_g-after.18022.18022.4	controllerType=0 controllerNumber=1 scan=18022	68.216
E.TC[+57.021]VPVLRC[+57.021]NTAAPMWLN[+2627.947]GTHPSSDE.G	HexNAc(6)Hex(6)Fuc(1)NeuAc(1)	C[+57]*2, N[+2628]	1360.82	4	5440.24	5441.23	-1	3.8	216	Specific	262.84	262.84	262.84	5.2	244	>sp|P07911|UROM_HUMAN Uromodulin OS=Homo sapiens OX=9606 GN=UMOD PE=1 SV=1	1	20230315_zy_umod_g-after.18050.18050.4	controllerType=0 controllerNumber=1 scan=18050	68.3167
E.TC[+57.021]VPVLRC[+57.021]NTAAPMWLN[+2627.947]GTHPSSDE.G	HexNAc(6)Hex(6)Fuc(1)NeuAc(1)	C[+57]*2, N[+2628]	1360.81	4	5440.21	5441.23	-1	-1.7	216	Specific	295.42	295.42	295.42	5.82	244	>sp|P07911|UROM_HUMAN Uromodulin OS=Homo sapiens OX=9606 GN=UMOD PE=1 SV=1	1	20230315_zy_umod_g-after.15506.15506.4	controllerType=0 controllerNumber=1 scan=15506	58.8454
E.TC[+57.021]VPVLRC[+57.021]NTAAPMWLN[+2627.947]GTHPSSDE.G	HexNAc(6)Hex(6)Fuc(1)NeuAc(1)	C[+57]*2, N[+2628]	1360.81	4	5440.22	5441.23	-1	-1.5	216	Specific	316.03	316.03	316.03	5.82	244	>sp|P07911|UROM_HUMAN Uromodulin OS=Homo sapiens OX=9606 GN=UMOD PE=1 SV=1	1	20230315_zy_umod_g-after.15422.15422.4	controllerType=0 controllerNumber=1 scan=15422	58.5369
E.TC[+57.021]VPVLRC[+57.021]NTAAPMWLN[+2627.947]GTHPSSDE.G	HexNAc(6)Hex(6)Fuc(1)NeuAc(1)	C[+57]*2, N[+2628]	1360.81	4	5440.21	5441.23	-1	-2	216	Specific	323.7	323.7	323.7	5.86	244	>sp|P07911|UROM_HUMAN Uromodulin OS=Homo sapiens OX=9606 GN=UMOD PE=1 SV=1	1	20230315_zy_umod_g-after.17952.17952.4	controllerType=0 controllerNumber=1 scan=17952	67.9618
E.TC[+57.021]VPVLRC[+57.021]NTAAPMWLN[+2919.042]GTHPSSDE.G	HexNAc(6)Hex(6)Fuc(1)NeuAc(2)	C[+57]*2, N[+2919]	1433.58	4	5731.31	5732.32	-1	-2.2	216	Specific	251.7	251.7	251.7	5.64	244	>sp|P07911|UROM_HUMAN Uromodulin OS=Homo sapiens OX=9606 GN=UMOD PE=1 SV=1	1	20230315_zy_umod_g-after.16814.16814.4	controllerType=0 controllerNumber=1 scan=16814	63.7375
E.TC[+57.021]VPVLRC[+57.021]NTAAPMWLN[+2919.042]GTHPSSDE.G	HexNAc(6)Hex(6)Fuc(1)NeuAc(2)	C[+57]*2, N[+2919]	1433.58	4	5731.3	5732.32	-1	-2.5	216	Specific	279.87	279.87	279.87	5.5	244	>sp|P07911|UROM_HUMAN Uromodulin OS=Homo sapiens OX=9606 GN=UMOD PE=1 SV=1	1	20230315_zy_umod_g-after.18546.18546.4	controllerType=0 controllerNumber=1 scan=18546	70.1089
E.TC[+57.021]VPVLRC[+57.021]NTAAPM[+15.995]WLN[+2919.042]GTHPSSDE.G	HexNAc(6)Hex(6)Fuc(1)NeuAc(2)	C[+57]*2, M[+16], N[+2919]	1437.59	4	5747.32	5748.32	-1	1.7	216	Specific	310.71	310.71	224.56	6.26	244	>sp|P07911|UROM_HUMAN Uromodulin OS=Homo sapiens OX=9606 GN=UMOD PE=1 SV=1	1	20230315_zy_umod_g-after.17777.17777.4	controllerType=0 controllerNumber=1 scan=17777	67.3253
E.TC[+57.021]VPVLRC[+57.021]NTAAPMWLN[+2919.042]GTHPSSDE.G	HexNAc(6)Hex(6)Fuc(1)NeuAc(2)	C[+57]*2, N[+2919]	1433.58	4	5731.31	5732.32	-1	-2.2	216	Specific	318.96	318.96	318.96	5.81	244	>sp|P07911|UROM_HUMAN Uromodulin OS=Homo sapiens OX=9606 GN=UMOD PE=1 SV=1	1	20230315_zy_umod_g-after.17095.17095.4	controllerType=0 controllerNumber=1 scan=17095	64.7702
E.TC[+57.021]VPVLRC[+57.021]NTAAPMWLN[+2919.042]GTHPSSDE.G	HexNAc(6)Hex(6)Fuc(1)NeuAc(2)	C[+57]*2, N[+2919]	1433.58	4	5731.31	5732.32	-1	-1.8	216	Specific	366.86	366.86	366.86	5.96	244	>sp|P07911|UROM_HUMAN Uromodulin OS=Homo sapiens OX=9606 GN=UMOD PE=1 SV=1	1	20230315_zy_umod_g-after.16983.16983.4	controllerType=0 controllerNumber=1 scan=16983	64.357
E.TC[+57.021]VPVLRC[+57.021]NTAAPMWLN[+2919.042]GTHPSSDE.G	HexNAc(6)Hex(6)Fuc(1)NeuAc(2)	C[+57]*2, N[+2919]	1433.84	4	5732.32	5732.32	0	0.3	216	Specific	525.8	525.8	525.8	8.09	244	>sp|P07911|UROM_HUMAN Uromodulin OS=Homo sapiens OX=9606 GN=UMOD PE=1 SV=1	1	20230315_zy_umod_g-after.18613.18613.4	controllerType=0 controllerNumber=1 scan=18613	70.356
E.TC[+57.021]VPVLRC[+57.021]NTAAPM[+15.995]WLN[+3210.137]GTHPSSDE.G	HexNAc(6)Hex(6)Fuc(1)NeuAc(3)	C[+57]*2, M[+16], N[+3210]	1510.61	4	6039.4	6039.41	0	-1.8	216	Specific	285.55	285.55	57.25	6.12	244	>sp|P07911|UROM_HUMAN Uromodulin OS=Homo sapiens OX=9606 GN=UMOD PE=1 SV=1	1	20230315_zy_umod_g-after.18393.18393.4	controllerType=0 controllerNumber=1 scan=18393	69.5457
E.TC[+57.021]VPVLRC[+57.021]NTAAPMWLN[+2481.889]GTHPSSDE.G	HexNAc(6)Hex(6)NeuAc(1)	C[+57]*2, N[+2482]	1324.3	4	5294.17	5295.17	-1	0.7	216	Specific	205.75	205.75	48.95	6.15	244	>sp|P07911|UROM_HUMAN Uromodulin OS=Homo sapiens OX=9606 GN=UMOD PE=1 SV=1	1	20230315_zy_umod_g-after.19533.19533.4	controllerType=0 controllerNumber=1 scan=19533	73.7388
E.TC[+57.021]VPVLRC[+57.021]NTAAPMWLN[+2481.889]GTHPSSDE.G	HexNAc(6)Hex(6)NeuAc(1)	C[+57]*2, N[+2482]	1324.55	4	5295.17	5295.17	0	0.7	216	Specific	252.02	252.02	22.79	6.54	244	>sp|P07911|UROM_HUMAN Uromodulin OS=Homo sapiens OX=9606 GN=UMOD PE=1 SV=1	1	20230315_zy_umod_g-after.13529.13529.4	controllerType=0 controllerNumber=1 scan=13529	51.442
E.TC[+57.021]VPVLRC[+57.021]NTAAPM[+15.995]WLN[+2772.984]GTHPSSDE.G	HexNAc(6)Hex(6)NeuAc(2)	C[+57]*2, M[+16], N[+2773]	1401.07	4	5601.27	5602.26	-1	2	216	Specific	252.21	252.21	252.21	6.07	244	>sp|P07911|UROM_HUMAN Uromodulin OS=Homo sapiens OX=9606 GN=UMOD PE=1 SV=1	1	20230315_zy_umod_g-after.18026.18026.4	controllerType=0 controllerNumber=1 scan=18026	68.2347
E.TC[+57.021]VPVLRC[+57.021]NTAAPMWLN[+2772.984]GTHPSSDE.G	HexNAc(6)Hex(6)NeuAc(2)	C[+57]*2, N[+2773]	1397.32	4	5586.27	5586.26	0	1.6	216	Specific	253.43	253.43	40.85	6.54	244	>sp|P07911|UROM_HUMAN Uromodulin OS=Homo sapiens OX=9606 GN=UMOD PE=1 SV=1	1	20230315_zy_umod_g-after.15061.15061.4	controllerType=0 controllerNumber=1 scan=15061	57.2081
E.TC[+57.021]VPVLRC[+57.021]NTAAPM[+15.995]WLN[+2772.984]GTHPSSDE.G	HexNAc(6)Hex(6)NeuAc(2)	C[+57]*2, M[+16], N[+2773]	1401.32	4	5602.24	5602.26	0	-3	216	Specific	258.5	258.5	258.5	5.92	244	>sp|P07911|UROM_HUMAN Uromodulin OS=Homo sapiens OX=9606 GN=UMOD PE=1 SV=1	1	20230315_zy_umod_g-after.17919.17919.4	controllerType=0 controllerNumber=1 scan=17919	67.8448
E.TC[+57.021]VPVLRC[+57.021]NTAAPM[+15.995]WLN[+2772.984]GTHPSSDE.G	HexNAc(6)Hex(6)NeuAc(2)	C[+57]*2, M[+16], N[+2773]	1401.32	4	5602.27	5602.26	0	1.4	216	Specific	284.96	284.96	47.04	6.56	244	>sp|P07911|UROM_HUMAN Uromodulin OS=Homo sapiens OX=9606 GN=UMOD PE=1 SV=1	1	20230315_zy_umod_g-after.17965.17965.4	controllerType=0 controllerNumber=1 scan=17965	68.011
E.TC[+57.021]VPVLRC[+57.021]NTAAPMWLN[+2772.984]GTHPSSDE.G	HexNAc(6)Hex(6)NeuAc(2)	C[+57]*2, N[+2773]	1397.07	4	5585.27	5586.26	-1	1.5	216	Specific	308.75	308.75	103.62	6.26	244	>sp|P07911|UROM_HUMAN Uromodulin OS=Homo sapiens OX=9606 GN=UMOD PE=1 SV=1	1	20230315_zy_umod_g-after.18704.18704.4	controllerType=0 controllerNumber=1 scan=18704	70.6771
E.TC[+57.021]VPVLRC[+57.021]NTAAPMWLN[+2772.984]GTHPSSDE.G	HexNAc(6)Hex(6)NeuAc(2)	C[+57]*2, N[+2773]	1397.32	4	5586.27	5586.26	0	1.1	216	Specific	402.45	402.45	143.43	7.78	244	>sp|P07911|UROM_HUMAN Uromodulin OS=Homo sapiens OX=9606 GN=UMOD PE=1 SV=1	1	20230315_zy_umod_g-after.18717.18717.4	controllerType=0 controllerNumber=1 scan=18717	70.7222
E.TC[+57.021]VPVLRC[+57.021]NTAAPMWLN[+2772.984]GTHPSSDE.G	HexNAc(6)Hex(6)NeuAc(2)	C[+57]*2, N[+2773]	1397.33	4	5586.28	5586.26	0	2.4	216	Specific	451.14	451.14	292.54	7.32	244	>sp|P07911|UROM_HUMAN Uromodulin OS=Homo sapiens OX=9606 GN=UMOD PE=1 SV=1	1	20230315_zy_umod_g-after.18726.18726.4	controllerType=0 controllerNumber=1 scan=18726	70.7589
E.TC[+57.021]VPVLRC[+57.021]NTAAPM[+15.995]WLN[+2789.999]GTHPSSDE.G	HexNAc(6)Hex(7)Fuc(1)NeuAc(1)	C[+57]*2, M[+16], N[+2790]	1405.32	4	5618.25	5619.27	-1	-3.5	216	Specific	224.6	224.6	87.19	5.53	244	>sp|P07911|UROM_HUMAN Uromodulin OS=Homo sapiens OX=9606 GN=UMOD PE=1 SV=1	1	20230315_zy_umod_g-after.16320.16320.4	controllerType=0 controllerNumber=1 scan=16320	61.8859
E.TC[+57.021]VPVLRC[+57.021]NTAAPM[+15.995]WLN[+3081.095]GTHPSSDE.G	HexNAc(6)Hex(7)Fuc(1)NeuAc(2)	C[+57]*2, M[+16], N[+3081]	1478.35	4	5910.37	5910.37	0	0.6	216	Specific	212.41	212.41	212.41	6.61	244	>sp|P07911|UROM_HUMAN Uromodulin OS=Homo sapiens OX=9606 GN=UMOD PE=1 SV=1	1	20230315_zy_umod_g-after.17590.17590.4	controllerType=0 controllerNumber=1 scan=17590	66.6097
E.TC[+57.021]VPVLRC[+57.021]NTAAPMWLN[+3081.095]GTHPSSDE.G	HexNAc(6)Hex(7)Fuc(1)NeuAc(2)	C[+57]*2, N[+3081]	1474.1	4	5893.36	5894.38	-1	-1.6	216	Specific	234.4	234.4	234.4	5.7	244	>sp|P07911|UROM_HUMAN Uromodulin OS=Homo sapiens OX=9606 GN=UMOD PE=1 SV=1	1	20230315_zy_umod_g-after.18458.18458.4	controllerType=0 controllerNumber=1 scan=18458	69.7912
E.TC[+57.021]VPVLRC[+57.021]NTAAPM[+15.995]WLN[+3081.095]GTHPSSDE.G	HexNAc(6)Hex(7)Fuc(1)NeuAc(2)	C[+57]*2, M[+16], N[+3081]	1478.09	4	5909.35	5910.37	-1	-2.6	216	Specific	269.66	269.66	269.66	5.5	244	>sp|P07911|UROM_HUMAN Uromodulin OS=Homo sapiens OX=9606 GN=UMOD PE=1 SV=1	1	20230315_zy_umod_g-after.17597.17597.4	controllerType=0 controllerNumber=1 scan=17597	66.6382
E.TC[+57.021]VPVLRC[+57.021]NTAAPMWLN[+3081.095]GTHPSSDE.G	HexNAc(6)Hex(7)Fuc(1)NeuAc(2)	C[+57]*2, N[+3081]	1474.1	4	5893.36	5894.38	-1	-1.2	216	Specific	309.55	309.55	309.55	5.82	244	>sp|P07911|UROM_HUMAN Uromodulin OS=Homo sapiens OX=9606 GN=UMOD PE=1 SV=1	1	20230315_zy_umod_g-after.18526.18526.4	controllerType=0 controllerNumber=1 scan=18526	70.0421
E.TC[+57.021]VPVLRC[+57.021]NTAAPM[+15.995]WLN[+3081.095]GTHPSSDE.G	HexNAc(6)Hex(7)Fuc(1)NeuAc(2)	C[+57]*2, M[+16], N[+3081]	1478.35	4	5910.36	5910.37	0	-1.9	216	Specific	313.34	313.34	313.34	6.29	244	>sp|P07911|UROM_HUMAN Uromodulin OS=Homo sapiens OX=9606 GN=UMOD PE=1 SV=1	1	20230315_zy_umod_g-after.17601.17601.4	controllerType=0 controllerNumber=1 scan=17601	66.6532
E.TC[+57.021]VPVLRC[+57.021]NTAAPMWLN[+3081.095]GTHPSSDE.G	HexNAc(6)Hex(7)Fuc(1)NeuAc(2)	C[+57]*2, N[+3081]	1474.1	4	5893.36	5894.38	-1	-2.3	216	Specific	389.13	389.13	389.13	6.97	244	>sp|P07911|UROM_HUMAN Uromodulin OS=Homo sapiens OX=9606 GN=UMOD PE=1 SV=1	1	20230315_zy_umod_g-after.18534.18534.4	controllerType=0 controllerNumber=1 scan=18534	70.068
E.TC[+57.021]VPVLRC[+57.021]NTAAPMWLN[+3372.190]GTHPSSDE.G	HexNAc(6)Hex(7)Fuc(1)NeuAc(3)	C[+57]*2, N[+3372]	1547.12	4	6185.46	6185.47	0	-1.4	216	Specific	202.56	202.56	202.56	6.09	244	>sp|P07911|UROM_HUMAN Uromodulin OS=Homo sapiens OX=9606 GN=UMOD PE=1 SV=1	1	20230315_zy_umod_g-after.19468.19468.4	controllerType=0 controllerNumber=1 scan=19468	73.4783
E.TC[+57.021]VPVLRC[+57.021]NTAAPMWLN[+3372.190]GTHPSSDE.G	HexNAc(6)Hex(7)Fuc(1)NeuAc(3)	C[+57]*2, N[+3372]	1547.12	4	6185.47	6185.47	0	-0.3	216	Specific	269.1	269.1	269.1	6.21	244	>sp|P07911|UROM_HUMAN Uromodulin OS=Homo sapiens OX=9606 GN=UMOD PE=1 SV=1	1	20230315_zy_umod_g-after.18954.18954.4	controllerType=0 controllerNumber=1 scan=18954	71.5881
E.TC[+57.021]VPVLRC[+57.021]NTAAPM[+15.995]WLN[+3372.190]GTHPSSDE.G	HexNAc(6)Hex(7)Fuc(1)NeuAc(3)	C[+57]*2, M[+16], N[+3372]	1551.12	4	6201.44	6201.47	0	-4.2	216	Specific	278	278	278	5.4	244	>sp|P07911|UROM_HUMAN Uromodulin OS=Homo sapiens OX=9606 GN=UMOD PE=1 SV=1	1	20230315_zy_umod_g-after.18304.18304.4	controllerType=0 controllerNumber=1 scan=18304	69.2246
E.TC[+57.021]VPVLRC[+57.021]NTAAPMWLN[+3372.190]GTHPSSDE.G	HexNAc(6)Hex(7)Fuc(1)NeuAc(3)	C[+57]*2, N[+3372]	1547.13	4	6185.48	6185.47	0	2.3	216	Specific	302.1	302.1	302.1	6.72	244	>sp|P07911|UROM_HUMAN Uromodulin OS=Homo sapiens OX=9606 GN=UMOD PE=1 SV=1	1	20230315_zy_umod_g-after.19085.19085.4	controllerType=0 controllerNumber=1 scan=19085	72.0716
E.TC[+57.021]VPVLRC[+57.021]NTAAPM[+15.995]WLN[+3372.190]GTHPSSDE.G	HexNAc(6)Hex(7)Fuc(1)NeuAc(3)	C[+57]*2, M[+16], N[+3372]	1550.87	4	6200.47	6201.47	-1	1.7	216	Specific	334.15	334.15	334.15	6.29	244	>sp|P07911|UROM_HUMAN Uromodulin OS=Homo sapiens OX=9606 GN=UMOD PE=1 SV=1	1	20230315_zy_umod_g-after.18253.18253.4	controllerType=0 controllerNumber=1 scan=18253	69.0394
E.TC[+57.021]VPVLRC[+57.021]NTAAPM[+15.995]WLN[+3372.190]GTHPSSDE.G	HexNAc(6)Hex(7)Fuc(1)NeuAc(3)	C[+57]*2, M[+16], N[+3372]	1551.12	4	6201.47	6201.47	0	0.5	216	Specific	340.21	340.21	340.21	6.75	244	>sp|P07911|UROM_HUMAN Uromodulin OS=Homo sapiens OX=9606 GN=UMOD PE=1 SV=1	1	20230315_zy_umod_g-after.18272.18272.4	controllerType=0 controllerNumber=1 scan=18272	69.1084
E.TC[+57.021]VPVLRC[+57.021]NTAAPMWLN[+3372.190]GTHPSSDE.G	HexNAc(6)Hex(7)Fuc(1)NeuAc(3)	C[+57]*2, N[+3372]	1547.12	4	6185.47	6185.47	0	0.4	216	Specific	373.77	373.77	373.77	7.86	244	>sp|P07911|UROM_HUMAN Uromodulin OS=Homo sapiens OX=9606 GN=UMOD PE=1 SV=1	1	20230315_zy_umod_g-after.19067.19067.4	controllerType=0 controllerNumber=1 scan=19067	72.0027
E.TC[+57.021]VPVLRC[+57.021]NTAAPMWLN[+3372.190]GTHPSSDE.G	HexNAc(6)Hex(7)Fuc(1)NeuAc(3)	C[+57]*2, N[+3372]	1547.13	4	6185.48	6185.47	0	2.2	216	Specific	572.64	572.64	572.64	8.75	244	>sp|P07911|UROM_HUMAN Uromodulin OS=Homo sapiens OX=9606 GN=UMOD PE=1 SV=1	1	20230315_zy_umod_g-after.19015.19015.4	controllerType=0 controllerNumber=1 scan=19015	71.8115
E.TC[+57.021]VPVLRC[+57.021]NTAAPMWLN[+3663.286]GTHPSSDE.G	HexNAc(6)Hex(7)Fuc(1)NeuAc(4)	C[+57]*2, N[+3663]	1619.89	4	6476.55	6476.57	0	-2.5	216	Specific	242.92	242.92	242.92	5.92	244	>sp|P07911|UROM_HUMAN Uromodulin OS=Homo sapiens OX=9606 GN=UMOD PE=1 SV=1	1	20230315_zy_umod_g-after.19490.19490.4	controllerType=0 controllerNumber=1 scan=19490	73.5692
E.TC[+57.021]VPVLRC[+57.021]NTAAPM[+15.995]WLN[+3663.286]GTHPSSDE.G	HexNAc(6)Hex(7)Fuc(1)NeuAc(4)	C[+57]*2, M[+16], N[+3663]	1623.9	4	6492.57	6492.56	0	1.6	216	Specific	297.7	297.7	297.7	6.72	244	>sp|P07911|UROM_HUMAN Uromodulin OS=Homo sapiens OX=9606 GN=UMOD PE=1 SV=1	1	20230315_zy_umod_g-after.18724.18724.4	controllerType=0 controllerNumber=1 scan=18724	70.7533
E.TC[+57.021]VPVLRC[+57.021]NTAAPM[+15.995]WLN[+3663.286]GTHPSSDE.G	HexNAc(6)Hex(7)Fuc(1)NeuAc(4)	C[+57]*2, M[+16], N[+3663]	1623.9	4	6492.57	6492.56	0	1.7	216	Specific	298.76	298.76	298.76	6.72	244	>sp|P07911|UROM_HUMAN Uromodulin OS=Homo sapiens OX=9606 GN=UMOD PE=1 SV=1	1	20230315_zy_umod_g-after.18774.18774.4	controllerType=0 controllerNumber=1 scan=18774	70.9285
E.TC[+57.021]VPVLRC[+57.021]NTAAPMWLN[+3663.286]GTHPSSDE.G	HexNAc(6)Hex(7)Fuc(1)NeuAc(4)	C[+57]*2, N[+3663]	1619.9	4	6476.57	6476.57	0	0.6	216	Specific	398.09	398.09	398.09	7.86	244	>sp|P07911|UROM_HUMAN Uromodulin OS=Homo sapiens OX=9606 GN=UMOD PE=1 SV=1	1	20230315_zy_umod_g-after.19462.19462.4	controllerType=0 controllerNumber=1 scan=19462	73.4624
E.TC[+57.021]VPVLRC[+57.021]NTAAPM[+15.995]WLN[+2643.941]GTHPSSDE.G	HexNAc(6)Hex(7)NeuAc(1)	C[+57]*2, M[+16], N[+2644]	1368.81	4	5472.22	5473.22	-1	0.8	216	Specific	220.1	220.1	220.1	6.15	244	>sp|P07911|UROM_HUMAN Uromodulin OS=Homo sapiens OX=9606 GN=UMOD PE=1 SV=1	1	20230315_zy_umod_g-after.16610.16610.4	controllerType=0 controllerNumber=1 scan=16610	62.9719
E.TC[+57.021]VPVLRC[+57.021]NTAAPMWLN[+2643.941]GTHPSSDE.G	HexNAc(6)Hex(7)NeuAc(1)	C[+57]*2, N[+2644]	1365.06	4	5457.23	5457.22	0	1.7	216	Specific	226.62	226.62	116.1	6.61	244	>sp|P07911|UROM_HUMAN Uromodulin OS=Homo sapiens OX=9606 GN=UMOD PE=1 SV=1	1	20230315_zy_umod_g-after.17987.17987.4	controllerType=0 controllerNumber=1 scan=17987	68.0955
E.TC[+57.021]VPVLRC[+57.021]NTAAPM[+15.995]WLN[+2643.941]GTHPSSDE.G	HexNAc(6)Hex(7)NeuAc(1)	C[+57]*2, M[+16], N[+2644]	1368.81	4	5472.21	5473.22	-1	-1.1	216	Specific	278.25	278.25	278.25	5.75	244	>sp|P07911|UROM_HUMAN Uromodulin OS=Homo sapiens OX=9606 GN=UMOD PE=1 SV=1	1	20230315_zy_umod_g-after.16604.16604.4	controllerType=0 controllerNumber=1 scan=16604	62.9537
E.TC[+57.021]VPVLRC[+57.021]NTAAPMWLN[+2643.941]GTHPSSDE.G	HexNAc(6)Hex(7)NeuAc(1)	C[+57]*2, N[+2644]	1365.06	4	5457.23	5457.22	0	1.8	216	Specific	498.17	498.17	131.81	7.86	244	>sp|P07911|UROM_HUMAN Uromodulin OS=Homo sapiens OX=9606 GN=UMOD PE=1 SV=1	1	20230315_zy_umod_g-after.17979.17979.4	controllerType=0 controllerNumber=1 scan=17979	68.0617
E.TC[+57.021]VPVLRC[+57.021]NTAAPM[+15.995]WLN[+2935.037]GTHPSSDE.G	HexNAc(6)Hex(7)NeuAc(2)	C[+57]*2, M[+16], N[+2935]	1441.83	4	5764.31	5764.31	0	-0.1	216	Specific	408.2	408.2	219.04	7.41	244	>sp|P07911|UROM_HUMAN Uromodulin OS=Homo sapiens OX=9606 GN=UMOD PE=1 SV=1	1	20230315_zy_umod_g-after.17862.17862.4	controllerType=0 controllerNumber=1 scan=17862	67.6368
E.TC[+57.021]VPVLRC[+57.021]NTAAPM[+15.995]WLN[+2935.037]GTHPSSDE.G	HexNAc(6)Hex(7)NeuAc(2)	C[+57]*2, M[+16], N[+2935]	1441.84	4	5764.32	5764.31	0	1	216	Specific	425.38	425.38	70.72	7.78	244	>sp|P07911|UROM_HUMAN Uromodulin OS=Homo sapiens OX=9606 GN=UMOD PE=1 SV=1	1	20230315_zy_umod_g-after.17882.17882.4	controllerType=0 controllerNumber=1 scan=17882	67.7041
E.TC[+57.021]VPVLRC[+57.021]NTAAPM[+15.995]WLN[+2935.037]GTHPSSDE.G	HexNAc(6)Hex(7)NeuAc(2)	C[+57]*2, M[+16], N[+2935]	1441.84	4	5764.32	5764.31	0	1.2	216	Specific	458.16	458.16	218.43	7.81	244	>sp|P07911|UROM_HUMAN Uromodulin OS=Homo sapiens OX=9606 GN=UMOD PE=1 SV=1	1	20230315_zy_umod_g-after.17822.17822.4	controllerType=0 controllerNumber=1 scan=17822	67.4888
E.TC[+57.021]VPVLRC[+57.021]NTAAPMWLN[+2935.037]GTHPSSDE.G	HexNAc(6)Hex(7)NeuAc(2)	C[+57]*2, N[+2935]	1437.84	4	5748.33	5748.32	0	2.1	216	Specific	499.42	499.42	308.79	7.86	244	>sp|P07911|UROM_HUMAN Uromodulin OS=Homo sapiens OX=9606 GN=UMOD PE=1 SV=1	1	20230315_zy_umod_g-after.18610.18610.4	controllerType=0 controllerNumber=1 scan=18610	70.3475
E.TC[+57.021]VPVLRC[+57.021]NTAAPMWLN[+2935.037]GTHPSSDE.G	HexNAc(6)Hex(7)NeuAc(2)	C[+57]*2, N[+2935]	1437.84	4	5748.32	5748.32	0	1.2	216	Specific	548.58	548.58	169.73	8.09	244	>sp|P07911|UROM_HUMAN Uromodulin OS=Homo sapiens OX=9606 GN=UMOD PE=1 SV=1	1	20230315_zy_umod_g-after.18659.18659.4	controllerType=0 controllerNumber=1 scan=18659	70.5185
E.TC[+57.021]VPVLRC[+57.021]NTAAPM[+15.995]WLN[+3226.132]GTHPSSDE.G	HexNAc(6)Hex(7)NeuAc(3)	C[+57]*2, M[+16], N[+3226]	1514.36	4	6054.43	6055.41	-1	4.6	216	Specific	206.75	206.75	206.75	5.23	244	>sp|P07911|UROM_HUMAN Uromodulin OS=Homo sapiens OX=9606 GN=UMOD PE=1 SV=1	1	20230315_zy_umod_g-after.18716.18716.4	controllerType=0 controllerNumber=1 scan=18716	70.7172
E.TC[+57.021]VPVLRC[+57.021]NTAAPM[+15.995]WLN[+3226.132]GTHPSSDE.G	HexNAc(6)Hex(7)NeuAc(3)	C[+57]*2, M[+16], N[+3226]	1514.61	4	6055.42	6055.41	0	2.2	216	Specific	227.51	227.51	227.51	6.61	244	>sp|P07911|UROM_HUMAN Uromodulin OS=Homo sapiens OX=9606 GN=UMOD PE=1 SV=1	1	20230315_zy_umod_g-after.18728.18728.4	controllerType=0 controllerNumber=1 scan=18728	70.7644
E.TC[+57.021]VPVLRC[+57.021]NTAAPMWLN[+3226.132]GTHPSSDE.G	HexNAc(6)Hex(7)NeuAc(3)	C[+57]*2, N[+3226]	1510.86	4	6040.43	6039.41	1	2.5	216	Specific	231.75	231.75	213.08	6.12	244	>sp|P07911|UROM_HUMAN Uromodulin OS=Homo sapiens OX=9606 GN=UMOD PE=1 SV=1	1	20230315_zy_umod_g-after.19075.19075.4	controllerType=0 controllerNumber=1 scan=19075	72.0361
E.TC[+57.021]VPVLRC[+57.021]NTAAPMWLN[+3226.132]GTHPSSDE.G	HexNAc(6)Hex(7)NeuAc(3)	C[+57]*2, N[+3226]	1510.35	4	6038.4	6039.41	-1	-2	216	Specific	299.9	299.9	217.75	5.82	244	>sp|P07911|UROM_HUMAN Uromodulin OS=Homo sapiens OX=9606 GN=UMOD PE=1 SV=1	1	20230315_zy_umod_g-after.19010.19010.4	controllerType=0 controllerNumber=1 scan=19010	71.7944
E.TC[+57.021]VPVLRC[+57.021]NTAAPM[+15.995]WLN[+3226.132]GTHPSSDE.G	HexNAc(6)Hex(7)NeuAc(3)	C[+57]*2, M[+16], N[+3226]	1514.61	4	6055.41	6055.41	0	0.5	216	Specific	305.24	305.24	305.24	6.72	244	>sp|P07911|UROM_HUMAN Uromodulin OS=Homo sapiens OX=9606 GN=UMOD PE=1 SV=1	1	20230315_zy_umod_g-after.18569.18569.4	controllerType=0 controllerNumber=1 scan=18569	70.1968
E.TC[+57.021]VPVLRC[+57.021]NTAAPM[+15.995]WLN[+3226.132]GTHPSSDE.G	HexNAc(6)Hex(7)NeuAc(3)	C[+57]*2, M[+16], N[+3226]	1514.61	4	6055.42	6055.41	0	2.1	216	Specific	316.64	316.64	316.64	6.71	244	>sp|P07911|UROM_HUMAN Uromodulin OS=Homo sapiens OX=9606 GN=UMOD PE=1 SV=1	1	20230315_zy_umod_g-after.18401.18401.4	controllerType=0 controllerNumber=1 scan=18401	69.5818
E.TC[+57.021]VPVLRC[+57.021]NTAAPM[+15.995]WLN[+3226.132]GTHPSSDE.G	HexNAc(6)Hex(7)NeuAc(3)	C[+57]*2, M[+16], N[+3226]	1514.61	4	6055.42	6055.41	0	1.3	216	Specific	324.06	324.06	324.06	6.75	244	>sp|P07911|UROM_HUMAN Uromodulin OS=Homo sapiens OX=9606 GN=UMOD PE=1 SV=1	1	20230315_zy_umod_g-after.18498.18498.4	controllerType=0 controllerNumber=1 scan=18498	69.9385
E.TC[+57.021]VPVLRC[+57.021]NTAAPMWLN[+3226.132]GTHPSSDE.G	HexNAc(6)Hex(7)NeuAc(3)	C[+57]*2, N[+3226]	1510.61	4	6039.42	6039.41	0	1.9	216	Specific	350	350	83.2	6.83	244	>sp|P07911|UROM_HUMAN Uromodulin OS=Homo sapiens OX=9606 GN=UMOD PE=1 SV=1	1	20230315_zy_umod_g-after.19101.19101.4	controllerType=0 controllerNumber=1 scan=19101	72.1319
E.TC[+57.021]VPVLRC[+57.021]NTAAPM[+15.995]WLN[+3226.132]GTHPSSDE.G	HexNAc(6)Hex(7)NeuAc(3)	C[+57]*2, M[+16], N[+3226]	1514.61	4	6055.42	6055.41	0	2.5	216	Specific	385.14	385.14	385.14	7.38	244	>sp|P07911|UROM_HUMAN Uromodulin OS=Homo sapiens OX=9606 GN=UMOD PE=1 SV=1	1	20230315_zy_umod_g-after.18381.18381.4	controllerType=0 controllerNumber=1 scan=18381	69.5035
E.TC[+57.021]VPVLRC[+57.021]NTAAPMWLN[+3226.132]GTHPSSDE.G	HexNAc(6)Hex(7)NeuAc(3)	C[+57]*2, N[+3226]	1510.61	4	6039.43	6039.41	0	2.5	216	Specific	391.21	391.21	259.63	7.38	244	>sp|P07911|UROM_HUMAN Uromodulin OS=Homo sapiens OX=9606 GN=UMOD PE=1 SV=1	1	20230315_zy_umod_g-after.19188.19188.4	controllerType=0 controllerNumber=1 scan=19188	72.4474
E.TC[+57.021]VPVLRC[+57.021]NTAAPMWLN[+3226.132]GTHPSSDE.G	HexNAc(6)Hex(7)NeuAc(3)	C[+57]*2, N[+3226]	1510.61	4	6039.42	6039.41	0	1.6	216	Specific	421.63	421.63	297.96	7.78	244	>sp|P07911|UROM_HUMAN Uromodulin OS=Homo sapiens OX=9606 GN=UMOD PE=1 SV=1	1	20230315_zy_umod_g-after.19103.19103.4	controllerType=0 controllerNumber=1 scan=19103	72.1379
E.TC[+57.021]VPVLRC[+57.021]NTAAPM[+15.995]WLN[+3226.132]GTHPSSDE.G	HexNAc(6)Hex(7)NeuAc(3)	C[+57]*2, M[+16], N[+3226]	1514.61	4	6055.42	6055.41	0	2.2	216	Specific	428.97	428.97	428.97	7.78	244	>sp|P07911|UROM_HUMAN Uromodulin OS=Homo sapiens OX=9606 GN=UMOD PE=1 SV=1	1	20230315_zy_umod_g-after.18490.18490.4	controllerType=0 controllerNumber=1 scan=18490	69.9039
E.TC[+57.021]VPVLRC[+57.021]NTAAPMWLN[+3517.228]GTHPSSDE.G	HexNAc(6)Hex(7)NeuAc(4)	C[+57]*2, N[+3517]	1266.91	5	6330.51	6330.51	0	0.8	216	Specific	202.84	202.84	202.84	5.64	244	>sp|P07911|UROM_HUMAN Uromodulin OS=Homo sapiens OX=9606 GN=UMOD PE=1 SV=1	1	20230315_zy_umod_g-after.19574.19574.5	controllerType=0 controllerNumber=1 scan=19574	73.8959
E.TC[+57.021]VPVLRC[+57.021]NTAAPM[+15.995]WLN[+3517.228]GTHPSSDE.G	HexNAc(6)Hex(7)NeuAc(4)	C[+57]*2, M[+16], N[+3517]	1270.11	5	6346.5	6346.5	0	0	216	Specific	219.95	219.95	219.95	5.73	244	>sp|P07911|UROM_HUMAN Uromodulin OS=Homo sapiens OX=9606 GN=UMOD PE=1 SV=1	1	20230315_zy_umod_g-after.18895.18895.5	controllerType=0 controllerNumber=1 scan=18895	71.3738
E.TC[+57.021]VPVLRC[+57.021]NTAAPMWLN[+3517.228]GTHPSSDE.G	HexNAc(6)Hex(7)NeuAc(4)	C[+57]*2, N[+3517]	1266.91	5	6330.52	6330.51	0	1.3	216	Specific	242.64	242.64	242.64	5.65	244	>sp|P07911|UROM_HUMAN Uromodulin OS=Homo sapiens OX=9606 GN=UMOD PE=1 SV=1	1	20230315_zy_umod_g-after.19568.19568.5	controllerType=0 controllerNumber=1 scan=19568	73.8793
E.TC[+57.021]VPVLRC[+57.021]NTAAPM[+15.995]WLN[+3517.228]GTHPSSDE.G	HexNAc(6)Hex(7)NeuAc(4)	C[+57]*2, M[+16], N[+3517]	1270.11	5	6346.51	6346.5	0	1.1	216	Specific	243.34	243.34	243.34	5.65	244	>sp|P07911|UROM_HUMAN Uromodulin OS=Homo sapiens OX=9606 GN=UMOD PE=1 SV=1	1	20230315_zy_umod_g-after.18936.18936.5	controllerType=0 controllerNumber=1 scan=18936	71.5243
E.TC[+57.021]VPVLRC[+57.021]NTAAPM[+15.995]WLN[+3517.228]GTHPSSDE.G	HexNAc(6)Hex(7)NeuAc(4)	C[+57]*2, M[+16], N[+3517]	1270.11	5	6346.51	6346.5	0	1.4	216	Specific	256.57	256.57	256.57	5.65	244	>sp|P07911|UROM_HUMAN Uromodulin OS=Homo sapiens OX=9606 GN=UMOD PE=1 SV=1	1	20230315_zy_umod_g-after.18913.18913.4	controllerType=0 controllerNumber=1 scan=18913	71.4359
E.TC[+57.021]VPVLRC[+57.021]NTAAPM[+15.995]WLN[+3517.228]GTHPSSDE.G	HexNAc(6)Hex(7)NeuAc(4)	C[+57]*2, M[+16], N[+3517]	1270.31	5	6347.5	6346.5	1	-1.2	216	Specific	295.47	295.47	295.47	5.4	244	>sp|P07911|UROM_HUMAN Uromodulin OS=Homo sapiens OX=9606 GN=UMOD PE=1 SV=1	1	20230315_zy_umod_g-after.18886.18886.5	controllerType=0 controllerNumber=1 scan=18886	71.3399
E.TC[+57.021]VPVLRC[+57.021]NTAAPM[+15.995]WLN[+3517.228]GTHPSSDE.G	HexNAc(6)Hex(7)NeuAc(4)	C[+57]*2, M[+16], N[+3517]	1587.38	4	6346.51	6346.5	0	1.6	216	Specific	322.46	322.46	322.46	6.75	244	>sp|P07911|UROM_HUMAN Uromodulin OS=Homo sapiens OX=9606 GN=UMOD PE=1 SV=1	1	20230315_zy_umod_g-after.18935.18935.4	controllerType=0 controllerNumber=1 scan=18935	71.522
E.TC[+57.021]VPVLRC[+57.021]NTAAPMWLN[+3517.228]GTHPSSDE.G	HexNAc(6)Hex(7)NeuAc(4)	C[+57]*2, N[+3517]	1583.38	4	6330.51	6330.51	0	0.8	216	Specific	369.97	369.97	369.97	6.86	244	>sp|P07911|UROM_HUMAN Uromodulin OS=Homo sapiens OX=9606 GN=UMOD PE=1 SV=1	1	20230315_zy_umod_g-after.19544.19544.4	controllerType=0 controllerNumber=1 scan=19544	73.7858
E.TC[+57.021]VPVLRC[+57.021]NTAAPMWLN[+3517.228]GTHPSSDE.G	HexNAc(6)Hex(7)NeuAc(4)	C[+57]*2, N[+3517]	1266.91	5	6330.51	6330.51	0	0.8	216	Specific	398.59	398.59	398.59	6.98	244	>sp|P07911|UROM_HUMAN Uromodulin OS=Homo sapiens OX=9606 GN=UMOD PE=1 SV=1	1	20230315_zy_umod_g-after.19555.19555.5	controllerType=0 controllerNumber=1 scan=19555	73.8297
E.TC[+57.021]VPVLRC[+57.021]NTAAPM[+15.995]WLN[+3517.228]GTHPSSDE.G	HexNAc(6)Hex(7)NeuAc(4)	C[+57]*2, M[+16], N[+3517]	1587.38	4	6346.52	6346.5	0	2.2	216	Specific	446.24	446.24	446.24	7.81	244	>sp|P07911|UROM_HUMAN Uromodulin OS=Homo sapiens OX=9606 GN=UMOD PE=1 SV=1	1	20230315_zy_umod_g-after.18887.18887.4	controllerType=0 controllerNumber=1 scan=18887	71.3443
E.TC[+57.021]VPVLRC[+57.021]NTAAPMWLN[+2952.052]GTHPSSDE.G	HexNAc(6)Hex(8)Fuc(1)NeuAc(1)	C[+57]*2, N[+2952]	1441.84	4	5764.35	5765.33	-1	2.8	216	Specific	202.13	202.13	96.9	5.57	244	>sp|P07911|UROM_HUMAN Uromodulin OS=Homo sapiens OX=9606 GN=UMOD PE=1 SV=1	1	20230315_zy_umod_g-after.18585.18585.4	controllerType=0 controllerNumber=1 scan=18585	70.254
E.TC[+57.021]VPVLRC[+57.021]NTAAPMWLN[+3405.200]GTHPSSDE.G	HexNAc(6)Hex(9)Fuc(1)NeuAc(2)	C[+57]*2, N[+3405]	1555.63	4	6219.5	6218.48	1	2	216	Specific	352.86	352.86	352.86	6.83	244	>sp|P07911|UROM_HUMAN Uromodulin OS=Homo sapiens OX=9606 GN=UMOD PE=1 SV=1	1	20230315_zy_umod_g-after.18233.18233.4	controllerType=0 controllerNumber=1 scan=18233	68.9711
E.TC[+57.021]VPVLRC[+57.021]NTAAPMWLN[+1907.714]GTHPSSDE.G	HexNAc(7)Hex(3)	C[+57]*2, N[+1908]	1181.01	4	4721	4720.99	0	1	216	Specific	321.77	321.77	321.77	5.01	244	>sp|P07911|UROM_HUMAN Uromodulin OS=Homo sapiens OX=9606 GN=UMOD PE=1 SV=1	1	20230315_zy_umod_g-after.12475.12475.4	controllerType=0 controllerNumber=1 scan=12475	47.3614
E.TC[+57.021]VPVLRC[+57.021]NTAAPM[+15.995]WLN[+3704.312]GTHPSSDE.G	HexNAc(7)Hex(6)Fuc(1)NeuAc(4)	C[+57]*2, M[+16], N[+3704]	1307.52	5	6533.59	6533.59	0	1.1	216	Specific	310.11	310.11	310.11	5.84	244	>sp|P07911|UROM_HUMAN Uromodulin OS=Homo sapiens OX=9606 GN=UMOD PE=1 SV=1	1	20230315_zy_umod_g-after.17512.17512.5	controllerType=0 controllerNumber=1 scan=17512	66.3119
E.TC[+57.021]VPVLRC[+57.021]NTAAPMWLN[+2701.983]GTHPSSDE.G	HexNAc(7)Hex(7)Fuc(1)	C[+57]*2, N[+2702]	1379.32	4	5514.25	5515.26	-1	-2.2	216	Specific	206.23	206.23	206.23	5.71	244	>sp|P07911|UROM_HUMAN Uromodulin OS=Homo sapiens OX=9606 GN=UMOD PE=1 SV=1	1	20230315_zy_umod_g-after.13749.13749.4	controllerType=0 controllerNumber=1 scan=13749	52.2699
E.TC[+57.021]VPVLRC[+57.021]NTAAPM[+15.995]WLN[+3284.174]GTHPSSDE.G	HexNAc(7)Hex(7)Fuc(1)NeuAc(2)	C[+57]*2, M[+16], N[+3284]	1528.87	4	6112.45	6113.45	-1	0.8	216	Specific	207.84	207.84	207.84	6.15	244	>sp|P07911|UROM_HUMAN Uromodulin OS=Homo sapiens OX=9606 GN=UMOD PE=1 SV=1	1	20230315_zy_umod_g-after.18435.18435.4	controllerType=0 controllerNumber=1 scan=18435	69.701
E.TC[+57.021]VPVLRC[+57.021]NTAAPMWLN[+3284.174]GTHPSSDE.G	HexNAc(7)Hex(7)Fuc(1)NeuAc(2)	C[+57]*2, N[+3284]	1524.86	4	6096.44	6097.45	-1	-2.6	216	Specific	213.72	213.72	213.72	5.53	244	>sp|P07911|UROM_HUMAN Uromodulin OS=Homo sapiens OX=9606 GN=UMOD PE=1 SV=1	1	20230315_zy_umod_g-after.18470.18470.4	controllerType=0 controllerNumber=1 scan=18470	69.8366
E.TC[+57.021]VPVLRC[+57.021]NTAAPMWLN[+3284.174]GTHPSSDE.G	HexNAc(7)Hex(7)Fuc(1)NeuAc(2)	C[+57]*2, N[+3284]	1524.87	4	6096.45	6097.45	-1	-0.4	216	Specific	213.94	213.94	213.94	5.78	244	>sp|P07911|UROM_HUMAN Uromodulin OS=Homo sapiens OX=9606 GN=UMOD PE=1 SV=1	1	20230315_zy_umod_g-after.16870.16870.4	controllerType=0 controllerNumber=1 scan=16870	63.9434
E.TC[+57.021]VPVLRC[+57.021]NTAAPMWLN[+3284.174]GTHPSSDE.G	HexNAc(7)Hex(7)Fuc(1)NeuAc(2)	C[+57]*2, N[+3284]	1524.87	4	6096.45	6097.45	-1	-0.3	216	Specific	231.88	231.88	231.88	5.78	244	>sp|P07911|UROM_HUMAN Uromodulin OS=Homo sapiens OX=9606 GN=UMOD PE=1 SV=1	1	20230315_zy_umod_g-after.18590.18590.4	controllerType=0 controllerNumber=1 scan=18590	70.2709
E.TC[+57.021]VPVLRC[+57.021]NTAAPMWLN[+3284.174]GTHPSSDE.G	HexNAc(7)Hex(7)Fuc(1)NeuAc(2)	C[+57]*2, N[+3284]	1524.87	4	6096.45	6097.45	-1	-0.6	216	Specific	236.58	236.58	236.58	5.76	244	>sp|P07911|UROM_HUMAN Uromodulin OS=Homo sapiens OX=9606 GN=UMOD PE=1 SV=1	1	20230315_zy_umod_g-after.16688.16688.4	controllerType=0 controllerNumber=1 scan=16688	63.2744
E.TC[+57.021]VPVLRC[+57.021]NTAAPMWLN[+3284.174]GTHPSSDE.G	HexNAc(7)Hex(7)Fuc(1)NeuAc(2)	C[+57]*2, N[+3284]	1524.87	4	6096.45	6097.45	-1	0.4	216	Specific	262.69	262.69	262.69	6.12	244	>sp|P07911|UROM_HUMAN Uromodulin OS=Homo sapiens OX=9606 GN=UMOD PE=1 SV=1	1	20230315_zy_umod_g-after.17430.17430.4	controllerType=0 controllerNumber=1 scan=17430	66.0118
E.TC[+57.021]VPVLRC[+57.021]NTAAPMWLN[+3284.174]GTHPSSDE.G	HexNAc(7)Hex(7)Fuc(1)NeuAc(2)	C[+57]*2, N[+3284]	1524.87	4	6096.44	6097.45	-1	-1.2	216	Specific	278.76	278.76	278.76	5.68	244	>sp|P07911|UROM_HUMAN Uromodulin OS=Homo sapiens OX=9606 GN=UMOD PE=1 SV=1	1	20230315_zy_umod_g-after.16772.16772.4	controllerType=0 controllerNumber=1 scan=16772	63.5825
E.TC[+57.021]VPVLRC[+57.021]NTAAPM[+15.995]WLN[+3575.270]GTHPSSDE.G	HexNAc(7)Hex(7)Fuc(1)NeuAc(3)	C[+57]*2, M[+16], N[+3575]	1281.72	5	6404.56	6404.54	0	2	216	Specific	231.53	231.53	231.53	5.73	244	>sp|P07911|UROM_HUMAN Uromodulin OS=Homo sapiens OX=9606 GN=UMOD PE=1 SV=1	1	20230315_zy_umod_g-after.17817.17817.5	controllerType=0 controllerNumber=1 scan=17817	67.4753
E.TC[+57.021]VPVLRC[+57.021]NTAAPMWLN[+3575.270]GTHPSSDE.G	HexNAc(7)Hex(7)Fuc(1)NeuAc(3)	C[+57]*2, N[+3575]	1597.64	4	6387.53	6388.55	-1	-2.1	216	Specific	244.69	244.69	244.69	5.64	244	>sp|P07911|UROM_HUMAN Uromodulin OS=Homo sapiens OX=9606 GN=UMOD PE=1 SV=1	1	20230315_zy_umod_g-after.17784.17784.4	controllerType=0 controllerNumber=1 scan=17784	67.3468
E.TC[+57.021]VPVLRC[+57.021]NTAAPMWLN[+3575.270]GTHPSSDE.G	HexNAc(7)Hex(7)Fuc(1)NeuAc(3)	C[+57]*2, N[+3575]	1597.64	4	6387.55	6388.55	-1	-0.2	216	Specific	346.22	346.22	346.22	6	244	>sp|P07911|UROM_HUMAN Uromodulin OS=Homo sapiens OX=9606 GN=UMOD PE=1 SV=1	1	20230315_zy_umod_g-after.17826.17826.4	controllerType=0 controllerNumber=1 scan=17826	67.4989
E.TC[+57.021]VPVLRC[+57.021]NTAAPMWLN[+3446.227]GTHPSSDE.G	HexNAc(7)Hex(8)Fuc(1)NeuAc(2)	C[+57]*2, N[+3446]	1565.38	4	6258.49	6259.51	-1	-2.3	216	Specific	240.28	240.28	240.28	5.64	244	>sp|P07911|UROM_HUMAN Uromodulin OS=Homo sapiens OX=9606 GN=UMOD PE=1 SV=1	1	20230315_zy_umod_g-after.18403.18403.4	controllerType=0 controllerNumber=1 scan=18403	69.5873
E.TC[+57.021]VPVLRC[+57.021]NTAAPM[+15.995]WLN[+2110.793]GTHPSSDE.G	HexNAc(8)Hex(3)	C[+57]*2, M[+16], N[+2111]	1235.77	4	4940.06	4940.07	0	-1.9	216	Specific	266.62	266.62	266.62	6.14	244	>sp|P07911|UROM_HUMAN Uromodulin OS=Homo sapiens OX=9606 GN=UMOD PE=1 SV=1	1	20230315_zy_umod_g-after.15403.15403.4	controllerType=0 controllerNumber=1 scan=15403	58.4735
E.TC[+57.021]VPVLRC[+57.021]NTAAPMWLN[+2110.793]GTHPSSDE.G	HexNAc(8)Hex(3)	C[+57]*2, N[+2111]	1642.36	3	4925.07	4924.07	1	-0.5	216	Specific	356.97	356.97	356.97	5.79	244	>sp|P07911|UROM_HUMAN Uromodulin OS=Homo sapiens OX=9606 GN=UMOD PE=1 SV=1	1	20230315_zy_umod_g-after.17272.17272.3	controllerType=0 controllerNumber=1 scan=17272	65.4366
E.TC[+57.021]VPVLRC[+57.021]NTAAPM[+15.995]WLN[+2110.793]GTHPSSDE.G	HexNAc(8)Hex(3)	C[+57]*2, M[+16], N[+2111]	1235.77	4	4940.07	4940.07	0	1	216	Specific	369.03	369.03	369.03	6.86	244	>sp|P07911|UROM_HUMAN Uromodulin OS=Homo sapiens OX=9606 GN=UMOD PE=1 SV=1	1	20230315_zy_umod_g-after.15487.15487.4	controllerType=0 controllerNumber=1 scan=15487	58.779
E.TC[+57.021]VPVLRC[+57.021]NTAAPMWLN[+2110.793]GTHPSSDE.G	HexNAc(8)Hex(3)	C[+57]*2, N[+2111]	1231.77	4	4924.08	4924.07	0	0.3	216	Specific	399.48	399.48	399.48	7.86	244	>sp|P07911|UROM_HUMAN Uromodulin OS=Homo sapiens OX=9606 GN=UMOD PE=1 SV=1	1	20230315_zy_umod_g-after.17248.17248.4	controllerType=0 controllerNumber=1 scan=17248	65.3445
E.TC[+57.021]VPVLRC[+57.021]NTAAPMWLN[+2110.793]GTHPSSDE.G	HexNAc(8)Hex(3)	C[+57]*2, N[+2111]	1231.78	4	4924.08	4924.07	0	1.4	216	Specific	448.01	448.01	448.01	7.81	244	>sp|P07911|UROM_HUMAN Uromodulin OS=Homo sapiens OX=9606 GN=UMOD PE=1 SV=1	1	20230315_zy_umod_g-after.17270.17270.4	controllerType=0 controllerNumber=1 scan=17270	65.431
E.TC[+57.021]VPVLRC[+57.021]NTAAPMWLN[+2256.851]GTHPSSDE.G	HexNAc(8)Hex(3)Fuc(1)	C[+57]*2, N[+2257]	1268.04	4	5069.13	5070.13	-1	1	216	Specific	321.8	321.8	321.8	6.29	244	>sp|P07911|UROM_HUMAN Uromodulin OS=Homo sapiens OX=9606 GN=UMOD PE=1 SV=1	1	20230315_zy_umod_g-after.17033.17033.4	controllerType=0 controllerNumber=1 scan=17033	64.5464
E.TC[+57.021]VPVLRC[+57.021]NTAAPMWLN[+2621.984]GTHPSSDE.G	HexNAc(9)Hex(4)Fuc(1)	C[+57]*2, N[+2622]	1359.32	4	5434.25	5435.26	-1	-1.9	216	Specific	255.11	255.11	255.11	5.64	244	>sp|P07911|UROM_HUMAN Uromodulin OS=Homo sapiens OX=9606 GN=UMOD PE=1 SV=1	1	20230315_zy_umod_g-after.14107.14107.4	controllerType=0 controllerNumber=1 scan=14107	53.6033
R.C[+57.021]NTAAPMWLN[+2188.740]GTHPSSDEGIVSR.K	HexNAc(2)Hex(11)	C[+57], N[+2189]	1563.3	3	4687.88	4688.87	-1	1.9	223	Specific	240.32	240.32	240.32	5.05	196	>sp|P07911|UROM_HUMAN Uromodulin OS=Homo sapiens OX=9606 GN=UMOD PE=1 SV=1	1	20230315_zy_umod_t-before.19576.19576.3	controllerType=0 controllerNumber=1 scan=19576	72.0164
R.C[+57.021]NTAAPMWLN[+2188.740]GTHPSSDEGIVSR.K	HexNAc(2)Hex(11)	C[+57], N[+2189]	1563.3	3	4687.88	4688.87	-1	2.5	223	Specific	374.98	374.98	374.98	6.98	196	>sp|P07911|UROM_HUMAN Uromodulin OS=Homo sapiens OX=9606 GN=UMOD PE=1 SV=1	1	20230315_zy_umod_t-before.19503.19503.3	controllerType=0 controllerNumber=1 scan=19503	71.7573
R.C[+57.021]NTAAPMWLN[+2350.793]GTHPSSDEGIVSR.K	HexNAc(2)Hex(12)	C[+57], N[+2351]	1213.49	4	4850.92	4850.93	0	-1.5	223	Specific	301.78	301.78	301.78	5.09	196	>sp|P07911|UROM_HUMAN Uromodulin OS=Homo sapiens OX=9606 GN=UMOD PE=1 SV=1	1	20230315_zy_umod_t-before.18198.18198.3	controllerType=0 controllerNumber=1 scan=18198	67.3323
R.C[+57.021]NTAAPMWLN[+2350.793]GTHPSSDEGIVSR.K	HexNAc(2)Hex(12)	C[+57], N[+2351]	1213.24	4	4849.93	4850.93	-1	1.2	223	Specific	365.54	365.54	365.54	5.13	196	>sp|P07911|UROM_HUMAN Uromodulin OS=Homo sapiens OX=9606 GN=UMOD PE=1 SV=1	1	20230315_zy_umod_t-before.18183.18183.4	controllerType=0 controllerNumber=1 scan=18183	67.2833
R.C[+57.021]NTAAPMWLN[+1702.581]GTHPSSDEGIVSR.K	HexNAc(2)Hex(8)	C[+57], N[+1703]	1401.92	3	4203.74	4202.72	1	5.2	223	Specific	303.36	303.36	303.36	3.99	196	>sp|P07911|UROM_HUMAN Uromodulin OS=Homo sapiens OX=9606 GN=UMOD PE=1 SV=1	1	20230315_zy_umod_t-before.15891.15891.3	controllerType=0 controllerNumber=1 scan=15891	59.046
R.C[+57.021]NTAAPM[+15.995]WLN[+2018.708]GTHPSSDEGIVSR.K	HexNAc(3)Hex(6)Fuc(1)NeuAc(1)	C[+57], M[+16], N[+2019]	1511.94	3	4533.81	4534.84	-1	-5.5	223	Specific	289.73	289.73	289.73	5.53	196	>sp|P07911|UROM_HUMAN Uromodulin OS=Homo sapiens OX=9606 GN=UMOD PE=1 SV=1	1	20230315_zy_umod_t-before.18869.18869.3	controllerType=0 controllerNumber=1 scan=18869	69.6146
R.C[+57.021]NTAAPMWLN[+1298.476]GTHPSSDEGIVSR.K	HexNAc(4)Hex(3)	C[+57], N[+1298]	1266.88	3	3798.61	3798.61	0	1.2	223	Specific	397.86	397.86	397.86	6.85	196	>sp|P07911|UROM_HUMAN Uromodulin OS=Homo sapiens OX=9606 GN=UMOD PE=1 SV=1	1	20230315_zy_umod_t-before.13925.13925.3	controllerType=0 controllerNumber=1 scan=13925	52.0254
R.C[+57.021]NTAAPMWLN[+1768.640]GTHPSSDEGIVSR.K	HexNAc(4)Hex(5)Fuc(1)	C[+57], N[+1769]	1423.93	3	4269.77	4268.77	1	-1.1	223	Specific	212.12	212.12	212.12	5.15	196	>sp|P07911|UROM_HUMAN Uromodulin OS=Homo sapiens OX=9606 GN=UMOD PE=1 SV=1	1	20230315_zy_umod_t-before.13447.13447.3	controllerType=0 controllerNumber=1 scan=13447	50.1993
R.C[+57.021]NTAAPMWLN[+1768.640]GTHPSSDEGIVSR.K	HexNAc(4)Hex(5)Fuc(1)	C[+57], N[+1769]	1423.26	3	4267.77	4268.77	-1	-0.1	223	Specific	580.86	580.86	82.69	8.91	196	>sp|P07911|UROM_HUMAN Uromodulin OS=Homo sapiens OX=9606 GN=UMOD PE=1 SV=1	1	20230315_zy_umod_t-before.13408.13408.3	controllerType=0 controllerNumber=1 scan=13408	50.0539
R.C[+57.021]NTAAPM[+15.995]WLN[+2059.735]GTHPSSDEGIVSR.K	HexNAc(4)Hex(5)Fuc(1)NeuAc(1)	C[+57], M[+16], N[+2060]	1525.96	3	4575.88	4575.86	0	2.6	223	Specific	380.12	353.39	154.46	5.7	196	>sp|P07911|UROM_HUMAN Uromodulin OS=Homo sapiens OX=9606 GN=UMOD PE=1 SV=1	1	20230315_zy_umod_t-before.12920.12920.3	controllerType=0 controllerNumber=1 scan=12920	48.212
R.C[+57.021]NTAAPMWLN[+2059.735]GTHPSSDEGIVSR.K	HexNAc(4)Hex(5)Fuc(1)NeuAc(1)	C[+57], N[+2060]	1520.63	3	4559.88	4559.87	0	2.3	223	Specific	567.07	553.08	553.08	8.5	196	>sp|P07911|UROM_HUMAN Uromodulin OS=Homo sapiens OX=9606 GN=UMOD PE=1 SV=1	1	20230315_zy_umod_t-before.14934.14934.3	controllerType=0 controllerNumber=1 scan=14934	55.7443
R.C[+57.021]NTAAPM[+15.995]WLN[+2059.735]GTHPSSDEGIVSR.K	HexNAc(4)Hex(5)Fuc(1)NeuAc(1)	C[+57], M[+16], N[+2060]	1525.96	3	4575.87	4575.86	0	1.9	223	Specific	640.52	615.25	119.3	9.54	196	>sp|P07911|UROM_HUMAN Uromodulin OS=Homo sapiens OX=9606 GN=UMOD PE=1 SV=1	1	20230315_zy_umod_t-before.12859.12859.3	controllerType=0 controllerNumber=1 scan=12859	47.9779
R.C[+57.021]NTAAPMWLN[+2059.735]GTHPSSDEGIVSR.K	HexNAc(4)Hex(5)Fuc(1)NeuAc(1)	C[+57], N[+2060]	1520.3	3	4558.87	4559.87	-1	1	223	Specific	648.35	648.35	648.35	9.37	196	>sp|P07911|UROM_HUMAN Uromodulin OS=Homo sapiens OX=9606 GN=UMOD PE=1 SV=1	1	20230315_zy_umod_t-before.15087.15087.3	controllerType=0 controllerNumber=1 scan=15087	56.3038
R.C[+57.021]NTAAPM[+15.995]WLN[+2059.735]GTHPSSDEGIVSR.K	HexNAc(4)Hex(5)Fuc(1)NeuAc(1)	C[+57], M[+16], N[+2060]	1144.72	4	4575.86	4575.86	0	-0.7	223	Specific	672.45	672.45	276.56	10.47	196	>sp|P07911|UROM_HUMAN Uromodulin OS=Homo sapiens OX=9606 GN=UMOD PE=1 SV=1	1	20230315_zy_umod_t-before.12860.12860.4	controllerType=0 controllerNumber=1 scan=12860	47.9809
R.C[+57.021]NTAAPM[+15.995]WLN[+2059.735]GTHPSSDEGIVSR.K	HexNAc(4)Hex(5)Fuc(1)NeuAc(1)	C[+57], M[+16], N[+2060]	1525.96	3	4575.87	4575.86	0	1.2	223	Specific	674.1	660.85	148.34	10.37	196	>sp|P07911|UROM_HUMAN Uromodulin OS=Homo sapiens OX=9606 GN=UMOD PE=1 SV=1	1	20230315_zy_umod_t-before.12936.12936.3	controllerType=0 controllerNumber=1 scan=12936	48.2723
R.C[+57.021]NTAAPM[+15.995]WLN[+2059.735]GTHPSSDEGIVSR.K	HexNAc(4)Hex(5)Fuc(1)NeuAc(1)	C[+57], M[+16], N[+2060]	1144.72	4	4575.87	4575.86	0	0.7	223	Specific	711.55	710.55	264.1	11.47	196	>sp|P07911|UROM_HUMAN Uromodulin OS=Homo sapiens OX=9606 GN=UMOD PE=1 SV=1	1	20230315_zy_umod_t-before.12937.12937.4	controllerType=0 controllerNumber=1 scan=12937	48.2757
R.C[+57.021]NTAAPMWLN[+2059.735]GTHPSSDEGIVSR.K	HexNAc(4)Hex(5)Fuc(1)NeuAc(1)	C[+57], N[+2060]	1520.63	3	4559.88	4559.87	0	1.8	223	Specific	833.59	833.59	833.59	13.54	196	>sp|P07911|UROM_HUMAN Uromodulin OS=Homo sapiens OX=9606 GN=UMOD PE=1 SV=1	1	20230315_zy_umod_t-before.14942.14942.3	controllerType=0 controllerNumber=1 scan=14942	55.7787
R.C[+57.021]NTAAPMWLN[+2059.735]GTHPSSDEGIVSR.K	HexNAc(4)Hex(5)Fuc(1)NeuAc(1)	C[+57], N[+2060]	1140.72	4	4559.87	4559.87	0	0.5	223	Specific	904.23	904.23	904.23	15.47	196	>sp|P07911|UROM_HUMAN Uromodulin OS=Homo sapiens OX=9606 GN=UMOD PE=1 SV=1	1	20230315_zy_umod_t-before.14944.14944.4	controllerType=0 controllerNumber=1 scan=14944	55.785
R.C[+57.021]NTAAPMWLN[+2350.830]GTHPSSDEGIVSR.K	HexNAc(4)Hex(5)Fuc(1)NeuAc(2)	C[+57], N[+2351]	1617.66	3	4850.97	4850.96	0	0.3	223	Specific	313.91	313.91	313.91	5.7	196	>sp|P07911|UROM_HUMAN Uromodulin OS=Homo sapiens OX=9606 GN=UMOD PE=1 SV=1	1	20230315_zy_umod_t-before.16913.16913.3	controllerType=0 controllerNumber=1 scan=16913	62.7562
R.C[+57.021]NTAAPMWLN[+2350.830]GTHPSSDEGIVSR.K	HexNAc(4)Hex(5)Fuc(1)NeuAc(2)	C[+57], N[+2351]	1213.24	4	4849.94	4850.96	-1	-4.7	223	Specific	318.95	318.95	8.48	4.09	196	>sp|P07911|UROM_HUMAN Uromodulin OS=Homo sapiens OX=9606 GN=UMOD PE=1 SV=1	1	20230315_zy_umod_t-before.18248.18248.4	controllerType=0 controllerNumber=1 scan=18248	67.5011
R.C[+57.021]NTAAPMWLN[+2350.830]GTHPSSDEGIVSR.K	HexNAc(4)Hex(5)Fuc(1)NeuAc(2)	C[+57], N[+2351]	1617.32	3	4849.94	4850.96	-1	-4.9	223	Specific	426.07	426.07	70.2	7.48	196	>sp|P07911|UROM_HUMAN Uromodulin OS=Homo sapiens OX=9606 GN=UMOD PE=1 SV=1	1	20230315_zy_umod_t-before.18180.18180.3	controllerType=0 controllerNumber=1 scan=18180	67.2746
R.C[+57.021]NTAAPMWLN[+2350.830]GTHPSSDEGIVSR.K	HexNAc(4)Hex(5)Fuc(1)NeuAc(2)	C[+57], N[+2351]	1617.66	3	4850.97	4850.96	0	1.6	223	Specific	442.82	442.82	442.82	7.28	196	>sp|P07911|UROM_HUMAN Uromodulin OS=Homo sapiens OX=9606 GN=UMOD PE=1 SV=1	1	20230315_zy_umod_t-before.16997.16997.3	controllerType=0 controllerNumber=1 scan=16997	63.0624
R.C[+57.021]NTAAPMWLN[+2350.830]GTHPSSDEGIVSR.K	HexNAc(4)Hex(5)Fuc(1)NeuAc(2)	C[+57], N[+2351]	1617.65	3	4850.94	4850.96	0	-4.5	223	Specific	473.89	473.89	73.52	7.64	196	>sp|P07911|UROM_HUMAN Uromodulin OS=Homo sapiens OX=9606 GN=UMOD PE=1 SV=1	1	20230315_zy_umod_t-before.18196.18196.3	controllerType=0 controllerNumber=1 scan=18196	67.3267
R.C[+57.021]NTAAPM[+15.995]WLN[+2350.830]GTHPSSDEGIVSR.K	HexNAc(4)Hex(5)Fuc(1)NeuAc(2)	C[+57], M[+16], N[+2351]	1217.5	4	4866.97	4866.96	0	2.2	223	Specific	485.91	485.91	485.91	6.8	196	>sp|P07911|UROM_HUMAN Uromodulin OS=Homo sapiens OX=9606 GN=UMOD PE=1 SV=1	1	20230315_zy_umod_t-before.14347.14347.4	controllerType=0 controllerNumber=1 scan=14347	53.6225
R.C[+57.021]NTAAPMWLN[+2350.830]GTHPSSDEGIVSR.K	HexNAc(4)Hex(5)Fuc(1)NeuAc(2)	C[+57], N[+2351]	1618	3	4851.98	4850.96	1	2.8	223	Specific	493.1	493.1	95.29	6.95	196	>sp|P07911|UROM_HUMAN Uromodulin OS=Homo sapiens OX=9606 GN=UMOD PE=1 SV=1	1	20230315_zy_umod_t-before.16805.16805.3	controllerType=0 controllerNumber=1 scan=16805	62.3593
R.C[+57.021]NTAAPM[+15.995]WLN[+2350.830]GTHPSSDEGIVSR.K	HexNAc(4)Hex(5)Fuc(1)NeuAc(2)	C[+57], M[+16], N[+2351]	1623.33	3	4867.96	4866.96	1	0.3	223	Specific	505.98	505.98	129.35	7.66	196	>sp|P07911|UROM_HUMAN Uromodulin OS=Homo sapiens OX=9606 GN=UMOD PE=1 SV=1	1	20230315_zy_umod_t-before.14674.14674.3	controllerType=0 controllerNumber=1 scan=14674	54.8006
R.C[+57.021]NTAAPM[+15.995]WLN[+2350.830]GTHPSSDEGIVSR.K	HexNAc(4)Hex(5)Fuc(1)NeuAc(2)	C[+57], M[+16], N[+2351]	1622.99	3	4866.97	4866.96	0	1.7	223	Specific	630.39	630.39	630.39	9.54	196	>sp|P07911|UROM_HUMAN Uromodulin OS=Homo sapiens OX=9606 GN=UMOD PE=1 SV=1	1	20230315_zy_umod_t-before.14466.14466.3	controllerType=0 controllerNumber=1 scan=14466	54.0618
R.C[+57.021]NTAAPM[+15.995]WLN[+2350.830]GTHPSSDEGIVSR.K	HexNAc(4)Hex(5)Fuc(1)NeuAc(2)	C[+57], M[+16], N[+2351]	1217.74	4	4867.95	4866.96	1	-3.1	223	Specific	653.2	653.2	91.83	10.47	196	>sp|P07911|UROM_HUMAN Uromodulin OS=Homo sapiens OX=9606 GN=UMOD PE=1 SV=1	1	20230315_zy_umod_t-before.14675.14675.2	controllerType=0 controllerNumber=1 scan=14675	54.8036
R.C[+57.021]NTAAPMWLN[+2350.830]GTHPSSDEGIVSR.K	HexNAc(4)Hex(5)Fuc(1)NeuAc(2)	C[+57], N[+2351]	1617.66	3	4850.97	4850.96	0	0.4	223	Specific	656.26	656.26	656.26	10.91	196	>sp|P07911|UROM_HUMAN Uromodulin OS=Homo sapiens OX=9606 GN=UMOD PE=1 SV=1	1	20230315_zy_umod_t-before.16765.16765.3	controllerType=0 controllerNumber=1 scan=16765	62.2096
R.C[+57.021]NTAAPMWLN[+2350.830]GTHPSSDEGIVSR.K	HexNAc(4)Hex(5)Fuc(1)NeuAc(2)	C[+57], N[+2351]	1213.75	4	4851.97	4850.96	1	1.2	223	Specific	665.5	665.5	67.54	9.93	196	>sp|P07911|UROM_HUMAN Uromodulin OS=Homo sapiens OX=9606 GN=UMOD PE=1 SV=1	1	20230315_zy_umod_t-before.16806.16806.4	controllerType=0 controllerNumber=1 scan=16806	62.3626
R.C[+57.021]NTAAPM[+15.995]WLN[+2350.830]GTHPSSDEGIVSR.K	HexNAc(4)Hex(5)Fuc(1)NeuAc(2)	C[+57], M[+16], N[+2351]	1217.5	4	4866.96	4866.96	0	0.2	223	Specific	707.07	707.07	707.07	11.47	196	>sp|P07911|UROM_HUMAN Uromodulin OS=Homo sapiens OX=9606 GN=UMOD PE=1 SV=1	1	20230315_zy_umod_t-before.14358.14358.4	controllerType=0 controllerNumber=1 scan=14358	53.6615
R.C[+57.021]NTAAPM[+15.995]WLN[+2350.830]GTHPSSDEGIVSR.K	HexNAc(4)Hex(5)Fuc(1)NeuAc(2)	C[+57], M[+16], N[+2351]	1217.5	4	4866.97	4866.96	0	1.4	223	Specific	757.28	757.28	757.28	12.11	196	>sp|P07911|UROM_HUMAN Uromodulin OS=Homo sapiens OX=9606 GN=UMOD PE=1 SV=1	1	20230315_zy_umod_t-before.14443.14443.4	controllerType=0 controllerNumber=1 scan=14443	53.9734
R.C[+57.021]NTAAPMWLN[+2350.830]GTHPSSDEGIVSR.K	HexNAc(4)Hex(5)Fuc(1)NeuAc(2)	C[+57], N[+2351]	1617.66	3	4850.97	4850.96	0	1.9	223	Specific	765.71	765.71	765.71	12.54	196	>sp|P07911|UROM_HUMAN Uromodulin OS=Homo sapiens OX=9606 GN=UMOD PE=1 SV=1	1	20230315_zy_umod_t-before.17089.17089.3	controllerType=0 controllerNumber=1 scan=17089	63.4051
R.C[+57.021]NTAAPM[+15.995]WLN[+2350.830]GTHPSSDEGIVSR.K	HexNAc(4)Hex(5)Fuc(1)NeuAc(2)	C[+57], M[+16], N[+2351]	1217.5	4	4866.97	4866.96	0	1.3	223	Specific	777.56	777.56	777.56	11.93	196	>sp|P07911|UROM_HUMAN Uromodulin OS=Homo sapiens OX=9606 GN=UMOD PE=1 SV=1	1	20230315_zy_umod_t-before.14465.14465.4	controllerType=0 controllerNumber=1 scan=14465	54.0592
R.C[+57.021]NTAAPMWLN[+2350.830]GTHPSSDEGIVSR.K	HexNAc(4)Hex(5)Fuc(1)NeuAc(2)	C[+57], N[+2351]	1617.66	3	4850.97	4850.96	0	1.1	223	Specific	801.02	801.02	801.02	13.37	196	>sp|P07911|UROM_HUMAN Uromodulin OS=Homo sapiens OX=9606 GN=UMOD PE=1 SV=1	1	20230315_zy_umod_t-before.16948.16948.3	controllerType=0 controllerNumber=1 scan=16948	62.8866
R.C[+57.021]NTAAPMWLN[+2350.830]GTHPSSDEGIVSR.K	HexNAc(4)Hex(5)Fuc(1)NeuAc(2)	C[+57], N[+2351]	1213.5	4	4850.97	4850.96	0	0.5	223	Specific	803.25	803.25	803.25	13.47	196	>sp|P07911|UROM_HUMAN Uromodulin OS=Homo sapiens OX=9606 GN=UMOD PE=1 SV=1	1	20230315_zy_umod_t-before.16949.16949.4	controllerType=0 controllerNumber=1 scan=16949	62.8883
R.C[+57.021]NTAAPMWLN[+2350.830]GTHPSSDEGIVSR.K	HexNAc(4)Hex(5)Fuc(1)NeuAc(2)	C[+57], N[+2351]	1213.5	4	4850.97	4850.96	0	0.5	223	Specific	837.64	837.64	837.64	13.47	196	>sp|P07911|UROM_HUMAN Uromodulin OS=Homo sapiens OX=9606 GN=UMOD PE=1 SV=1	1	20230315_zy_umod_t-before.17087.17087.4	controllerType=0 controllerNumber=1 scan=17087	63.3997
R.C[+57.021]NTAAPMWLN[+2350.830]GTHPSSDEGIVSR.K	HexNAc(4)Hex(5)Fuc(1)NeuAc(2)	C[+57], N[+2351]	1213.5	4	4850.97	4850.96	0	1.8	223	Specific	844.22	844.22	844.22	13.11	196	>sp|P07911|UROM_HUMAN Uromodulin OS=Homo sapiens OX=9606 GN=UMOD PE=1 SV=1	1	20230315_zy_umod_t-before.17093.17093.4	controllerType=0 controllerNumber=1 scan=17093	63.4154
R.C[+57.021]NTAAPMWLN[+2350.830]GTHPSSDEGIVSR.K	HexNAc(4)Hex(5)Fuc(1)NeuAc(2)	C[+57], N[+2351]	1213.75	4	4851.97	4850.96	1	0.2	223	Specific	847.37	847.37	121.2	13.47	196	>sp|P07911|UROM_HUMAN Uromodulin OS=Homo sapiens OX=9606 GN=UMOD PE=1 SV=1	1	20230315_zy_umod_t-before.16920.16920.4	controllerType=0 controllerNumber=1 scan=16920	62.7849
R.C[+57.021]NTAAPMWLN[+1913.677]GTHPSSDEGIVSR.K	HexNAc(4)Hex(5)NeuAc(1)	C[+57], N[+1914]	1471.93	3	4413.79	4413.81	0	-5.6	223	Specific	238.33	238.33	77.39	5.36	196	>sp|P07911|UROM_HUMAN Uromodulin OS=Homo sapiens OX=9606 GN=UMOD PE=1 SV=1	1	20230315_zy_umod_t-before.17266.17266.3	controllerType=0 controllerNumber=1 scan=17266	64.0567
R.C[+57.021]NTAAPM[+15.995]WLN[+1913.677]GTHPSSDEGIVSR.K	HexNAc(4)Hex(5)NeuAc(1)	C[+57], M[+16], N[+1914]	1476.94	3	4428.81	4429.81	-1	1.2	223	Specific	298.58	298.58	298.58	4.99	196	>sp|P07911|UROM_HUMAN Uromodulin OS=Homo sapiens OX=9606 GN=UMOD PE=1 SV=1	1	20230315_zy_umod_t-before.13275.13275.3	controllerType=0 controllerNumber=1 scan=13275	49.5591
R.C[+57.021]NTAAPMWLN[+1913.677]GTHPSSDEGIVSR.K	HexNAc(4)Hex(5)NeuAc(1)	C[+57], N[+1914]	1471.94	3	4413.82	4413.81	0	1.6	223	Specific	377.65	377.65	196	7.03	196	>sp|P07911|UROM_HUMAN Uromodulin OS=Homo sapiens OX=9606 GN=UMOD PE=1 SV=1	1	20230315_zy_umod_t-before.15358.15358.3	controllerType=0 controllerNumber=1 scan=15358	57.2656
R.C[+57.021]NTAAPM[+15.995]WLN[+1913.677]GTHPSSDEGIVSR.K	HexNAc(4)Hex(5)NeuAc(1)	C[+57], M[+16], N[+1914]	1476.94	3	4428.81	4429.81	-1	2	223	Specific	378.49	378.49	378.49	7.03	196	>sp|P07911|UROM_HUMAN Uromodulin OS=Homo sapiens OX=9606 GN=UMOD PE=1 SV=1	1	20230315_zy_umod_t-before.13207.13207.3	controllerType=0 controllerNumber=1 scan=13207	49.3018
R.C[+57.021]NTAAPM[+15.995]WLN[+1913.677]GTHPSSDEGIVSR.K	HexNAc(4)Hex(5)NeuAc(1)	C[+57], M[+16], N[+1914]	1477.28	3	4429.82	4429.81	0	2.3	223	Specific	389.78	334.59	101.83	5.55	196	>sp|P07911|UROM_HUMAN Uromodulin OS=Homo sapiens OX=9606 GN=UMOD PE=1 SV=1	1	20230315_zy_umod_t-before.13301.13301.3	controllerType=0 controllerNumber=1 scan=13301	49.6496
R.C[+57.021]NTAAPM[+15.995]WLN[+1913.677]GTHPSSDEGIVSR.K	HexNAc(4)Hex(5)NeuAc(1)	C[+57], M[+16], N[+1914]	1477.61	3	4430.81	4429.81	1	0.1	223	Specific	424.55	419.19	203.21	7.48	196	>sp|P07911|UROM_HUMAN Uromodulin OS=Homo sapiens OX=9606 GN=UMOD PE=1 SV=1	1	20230315_zy_umod_t-before.13407.13407.3	controllerType=0 controllerNumber=1 scan=13407	50.051
R.C[+57.021]NTAAPM[+15.995]WLN[+1913.677]GTHPSSDEGIVSR.K	HexNAc(4)Hex(5)NeuAc(1)	C[+57], M[+16], N[+1914]	1477.28	3	4429.81	4429.81	0	1.4	223	Specific	543.51	508.86	173.5	7.52	196	>sp|P07911|UROM_HUMAN Uromodulin OS=Homo sapiens OX=9606 GN=UMOD PE=1 SV=1	1	20230315_zy_umod_t-before.13188.13188.3	controllerType=0 controllerNumber=1 scan=13188	49.2317
R.C[+57.021]NTAAPMWLN[+1913.677]GTHPSSDEGIVSR.K	HexNAc(4)Hex(5)NeuAc(1)	C[+57], N[+1914]	1471.94	3	4413.81	4413.81	0	0	223	Specific	565.35	565.35	239.68	8.91	196	>sp|P07911|UROM_HUMAN Uromodulin OS=Homo sapiens OX=9606 GN=UMOD PE=1 SV=1	1	20230315_zy_umod_t-before.15210.15210.3	controllerType=0 controllerNumber=1 scan=15210	56.7466
R.C[+57.021]NTAAPMWLN[+1913.677]GTHPSSDEGIVSR.K	HexNAc(4)Hex(5)NeuAc(1)	C[+57], N[+1914]	1104.21	4	4413.81	4413.81	0	0.8	223	Specific	609.06	609.06	240.77	9.47	196	>sp|P07911|UROM_HUMAN Uromodulin OS=Homo sapiens OX=9606 GN=UMOD PE=1 SV=1	1	20230315_zy_umod_t-before.15238.15238.4	controllerType=0 controllerNumber=1 scan=15238	56.8415
R.C[+57.021]NTAAPM[+15.995]WLN[+1913.677]GTHPSSDEGIVSR.K	HexNAc(4)Hex(5)NeuAc(1)	C[+57], M[+16], N[+1914]	1107.96	4	4428.81	4429.81	-1	1.8	223	Specific	635.63	635.63	635.63	9.11	196	>sp|P07911|UROM_HUMAN Uromodulin OS=Homo sapiens OX=9606 GN=UMOD PE=1 SV=1	1	20230315_zy_umod_t-before.13309.13309.4	controllerType=0 controllerNumber=1 scan=13309	49.6877
R.C[+57.021]NTAAPM[+15.995]WLN[+1913.677]GTHPSSDEGIVSR.K	HexNAc(4)Hex(5)NeuAc(1)	C[+57], M[+16], N[+1914]	1477.27	3	4429.81	4429.81	0	0.4	223	Specific	637.81	620.95	212.43	9.91	196	>sp|P07911|UROM_HUMAN Uromodulin OS=Homo sapiens OX=9606 GN=UMOD PE=1 SV=1	1	20230315_zy_umod_t-before.13200.13200.3	controllerType=0 controllerNumber=1 scan=13200	49.2789
R.C[+57.021]NTAAPM[+15.995]WLN[+1913.677]GTHPSSDEGIVSR.K	HexNAc(4)Hex(5)NeuAc(1)	C[+57], M[+16], N[+1914]	1477.28	3	4429.81	4429.81	0	1.2	223	Specific	649.48	627.54	210.33	9.37	196	>sp|P07911|UROM_HUMAN Uromodulin OS=Homo sapiens OX=9606 GN=UMOD PE=1 SV=1	1	20230315_zy_umod_t-before.13308.13308.3	controllerType=0 controllerNumber=1 scan=13308	49.6845
R.C[+57.021]NTAAPM[+15.995]WLN[+1913.677]GTHPSSDEGIVSR.K	HexNAc(4)Hex(5)NeuAc(1)	C[+57], M[+16], N[+1914]	1108.21	4	4429.81	4429.81	0	1.1	223	Specific	701.08	701.08	351.15	10.93	196	>sp|P07911|UROM_HUMAN Uromodulin OS=Homo sapiens OX=9606 GN=UMOD PE=1 SV=1	1	20230315_zy_umod_t-before.13214.13214.4	controllerType=0 controllerNumber=1 scan=13214	49.3315
R.C[+57.021]NTAAPMWLN[+1913.677]GTHPSSDEGIVSR.K	HexNAc(4)Hex(5)NeuAc(1)	C[+57], N[+1914]	1471.94	3	4413.81	4413.81	0	0.6	223	Specific	811.73	811.73	310.28	13.91	196	>sp|P07911|UROM_HUMAN Uromodulin OS=Homo sapiens OX=9606 GN=UMOD PE=1 SV=1	1	20230315_zy_umod_t-before.15246.15246.3	controllerType=0 controllerNumber=1 scan=15246	56.8744
R.C[+57.021]NTAAPMWLN[+1913.677]GTHPSSDEGIVSR.K	HexNAc(4)Hex(5)NeuAc(1)	C[+57], N[+1914]	1104.21	4	4413.81	4413.81	0	0.8	223	Specific	854.81	854.81	493.58	14.47	196	>sp|P07911|UROM_HUMAN Uromodulin OS=Homo sapiens OX=9606 GN=UMOD PE=1 SV=1	1	20230315_zy_umod_t-before.15248.15248.4	controllerType=0 controllerNumber=1 scan=15248	56.8801
R.C[+57.021]NTAAPMWLN[+2204.772]GTHPSSDEGIVSR.K	HexNAc(4)Hex(5)NeuAc(2)	C[+57], N[+2205]	1568.63	3	4703.89	4704.91	-1	-3.7	223	Specific	261.62	261.62	127.31	5.51	196	>sp|P07911|UROM_HUMAN Uromodulin OS=Homo sapiens OX=9606 GN=UMOD PE=1 SV=1	1	20230315_zy_umod_t-before.18611.18611.3	controllerType=0 controllerNumber=1 scan=18611	68.7531
R.C[+57.021]NTAAPM[+15.995]WLN[+2204.772]GTHPSSDEGIVSR.K	HexNAc(4)Hex(5)NeuAc(2)	C[+57], M[+16], N[+2205]	1181.23	4	4721.88	4720.9	1	-4.8	223	Specific	289.13	289.13	289.13	3.93	196	>sp|P07911|UROM_HUMAN Uromodulin OS=Homo sapiens OX=9606 GN=UMOD PE=1 SV=1	1	20230315_zy_umod_t-before.17622.17622.4	controllerType=0 controllerNumber=1 scan=17622	65.298
R.C[+57.021]NTAAPMWLN[+2204.772]GTHPSSDEGIVSR.K	HexNAc(4)Hex(5)NeuAc(2)	C[+57], N[+2205]	1568.63	3	4703.89	4704.91	-1	-3.2	223	Specific	325.73	325.73	182.32	5.99	196	>sp|P07911|UROM_HUMAN Uromodulin OS=Homo sapiens OX=9606 GN=UMOD PE=1 SV=1	1	20230315_zy_umod_t-before.18631.18631.3	controllerType=0 controllerNumber=1 scan=18631	68.8134
R.C[+57.021]NTAAPMWLN[+2204.772]GTHPSSDEGIVSR.K	HexNAc(4)Hex(5)NeuAc(2)	C[+57], N[+2205]	1568.98	3	4704.92	4704.91	0	2.8	223	Specific	326.88	326.88	326.88	5.29	196	>sp|P07911|UROM_HUMAN Uromodulin OS=Homo sapiens OX=9606 GN=UMOD PE=1 SV=1	1	20230315_zy_umod_t-before.17081.17081.3	controllerType=0 controllerNumber=1 scan=17081	63.3726
R.C[+57.021]NTAAPMWLN[+2204.772]GTHPSSDEGIVSR.K	HexNAc(4)Hex(5)NeuAc(2)	C[+57], N[+2205]	1568.63	3	4703.89	4704.91	-1	-3.1	223	Specific	339.03	339.03	81.33	5.99	196	>sp|P07911|UROM_HUMAN Uromodulin OS=Homo sapiens OX=9606 GN=UMOD PE=1 SV=1	1	20230315_zy_umod_t-before.18482.18482.3	controllerType=0 controllerNumber=1 scan=18482	68.3185
R.C[+57.021]NTAAPMWLN[+2204.772]GTHPSSDEGIVSR.K	HexNAc(4)Hex(5)NeuAc(2)	C[+57], N[+2205]	1568.63	3	4703.88	4704.91	-1	-5.4	223	Specific	350.98	350.98	92.36	6.14	196	>sp|P07911|UROM_HUMAN Uromodulin OS=Homo sapiens OX=9606 GN=UMOD PE=1 SV=1	1	20230315_zy_umod_t-before.18498.18498.3	controllerType=0 controllerNumber=1 scan=18498	68.3757
R.C[+57.021]NTAAPM[+15.995]WLN[+2204.772]GTHPSSDEGIVSR.K	HexNAc(4)Hex(5)NeuAc(2)	C[+57], M[+16], N[+2205]	1574.31	3	4720.91	4720.9	0	0.9	223	Specific	354.21	354.21	133.48	6.14	196	>sp|P07911|UROM_HUMAN Uromodulin OS=Homo sapiens OX=9606 GN=UMOD PE=1 SV=1	1	20230315_zy_umod_t-before.15152.15152.3	controllerType=0 controllerNumber=1 scan=15152	56.5424
R.C[+57.021]NTAAPM[+15.995]WLN[+2204.772]GTHPSSDEGIVSR.K	HexNAc(4)Hex(5)NeuAc(2)	C[+57], M[+16], N[+2205]	1574.64	3	4721.89	4720.9	1	-2.7	223	Specific	377.57	377.57	377.57	7.39	196	>sp|P07911|UROM_HUMAN Uromodulin OS=Homo sapiens OX=9606 GN=UMOD PE=1 SV=1	1	20230315_zy_umod_t-before.17626.17626.3	controllerType=0 controllerNumber=1 scan=17626	65.3118
R.C[+57.021]NTAAPMWLN[+2204.772]GTHPSSDEGIVSR.K	HexNAc(4)Hex(5)NeuAc(2)	C[+57], N[+2205]	1568.97	3	4704.89	4704.91	0	-2.7	223	Specific	409.62	409.62	208.8	7.48	196	>sp|P07911|UROM_HUMAN Uromodulin OS=Homo sapiens OX=9606 GN=UMOD PE=1 SV=1	1	20230315_zy_umod_t-before.18436.18436.3	controllerType=0 controllerNumber=1 scan=18436	68.1506
R.C[+57.021]NTAAPM[+15.995]WLN[+2204.772]GTHPSSDEGIVSR.K	HexNAc(4)Hex(5)NeuAc(2)	C[+57], M[+16], N[+2205]	1574.64	3	4721.91	4720.9	1	1.5	223	Specific	486.52	486.52	109.54	7.29	196	>sp|P07911|UROM_HUMAN Uromodulin OS=Homo sapiens OX=9606 GN=UMOD PE=1 SV=1	1	20230315_zy_umod_t-before.15174.15174.3	controllerType=0 controllerNumber=1 scan=15174	56.6172
R.C[+57.021]NTAAPM[+15.995]WLN[+2204.772]GTHPSSDEGIVSR.K	HexNAc(4)Hex(5)NeuAc(2)	C[+57], M[+16], N[+2205]	1180.98	4	4720.91	4720.9	0	1.3	223	Specific	496.22	496.22	104.97	6.68	196	>sp|P07911|UROM_HUMAN Uromodulin OS=Homo sapiens OX=9606 GN=UMOD PE=1 SV=1	1	20230315_zy_umod_t-before.15153.15153.4	controllerType=0 controllerNumber=1 scan=15153	56.5473
R.C[+57.021]NTAAPMWLN[+2204.772]GTHPSSDEGIVSR.K	HexNAc(4)Hex(5)NeuAc(2)	C[+57], N[+2205]	1568.98	3	4704.91	4704.91	0	1	223	Specific	510.41	510.41	510.41	7.12	196	>sp|P07911|UROM_HUMAN Uromodulin OS=Homo sapiens OX=9606 GN=UMOD PE=1 SV=1	1	20230315_zy_umod_t-before.17427.17427.3	controllerType=0 controllerNumber=1 scan=17427	64.5767
R.C[+57.021]NTAAPMWLN[+2204.772]GTHPSSDEGIVSR.K	HexNAc(4)Hex(5)NeuAc(2)	C[+57], N[+2205]	1176.98	4	4704.92	4704.91	0	2.2	223	Specific	567.35	567.35	567.35	8.06	196	>sp|P07911|UROM_HUMAN Uromodulin OS=Homo sapiens OX=9606 GN=UMOD PE=1 SV=1	1	20230315_zy_umod_t-before.17466.17466.4	controllerType=0 controllerNumber=1 scan=17466	64.7134
R.C[+57.021]NTAAPM[+15.995]WLN[+2204.772]GTHPSSDEGIVSR.K	HexNAc(4)Hex(5)NeuAc(2)	C[+57], M[+16], N[+2205]	1180.98	4	4720.88	4720.9	0	-3.9	223	Specific	604.83	604.83	604.83	9.47	196	>sp|P07911|UROM_HUMAN Uromodulin OS=Homo sapiens OX=9606 GN=UMOD PE=1 SV=1	1	20230315_zy_umod_t-before.15071.15071.4	controllerType=0 controllerNumber=1 scan=15071	56.2468
R.C[+57.021]NTAAPM[+15.995]WLN[+2204.772]GTHPSSDEGIVSR.K	HexNAc(4)Hex(5)NeuAc(2)	C[+57], M[+16], N[+2205]	1574.64	3	4721.9	4720.9	1	-0.7	223	Specific	637.32	637.32	126.5	9.91	196	>sp|P07911|UROM_HUMAN Uromodulin OS=Homo sapiens OX=9606 GN=UMOD PE=1 SV=1	1	20230315_zy_umod_t-before.15159.15159.3	controllerType=0 controllerNumber=1 scan=15159	56.5656
R.C[+57.021]NTAAPM[+15.995]WLN[+2204.772]GTHPSSDEGIVSR.K	HexNAc(4)Hex(5)NeuAc(2)	C[+57], M[+16], N[+2205]	1574.31	3	4720.91	4720.9	0	1.2	223	Specific	648.42	648.42	103.88	9.37	196	>sp|P07911|UROM_HUMAN Uromodulin OS=Homo sapiens OX=9606 GN=UMOD PE=1 SV=1	1	20230315_zy_umod_t-before.15028.15028.3	controllerType=0 controllerNumber=1 scan=15028	56.0924
R.C[+57.021]NTAAPM[+15.995]WLN[+2204.772]GTHPSSDEGIVSR.K	HexNAc(4)Hex(5)NeuAc(2)	C[+57], M[+16], N[+2205]	1180.98	4	4720.91	4720.9	0	1.1	223	Specific	654.54	654.54	235.01	9.93	196	>sp|P07911|UROM_HUMAN Uromodulin OS=Homo sapiens OX=9606 GN=UMOD PE=1 SV=1	1	20230315_zy_umod_t-before.14858.14858.4	controllerType=0 controllerNumber=1 scan=14858	55.4688
R.C[+57.021]NTAAPM[+15.995]WLN[+2204.772]GTHPSSDEGIVSR.K	HexNAc(4)Hex(5)NeuAc(2)	C[+57], M[+16], N[+2205]	1180.98	4	4720.9	4720.9	0	0.2	223	Specific	695.66	695.66	228.97	10.47	196	>sp|P07911|UROM_HUMAN Uromodulin OS=Homo sapiens OX=9606 GN=UMOD PE=1 SV=1	1	20230315_zy_umod_t-before.14873.14873.4	controllerType=0 controllerNumber=1 scan=14873	55.5255
R.C[+57.021]NTAAPMWLN[+2204.772]GTHPSSDEGIVSR.K	HexNAc(4)Hex(5)NeuAc(2)	C[+57], N[+2205]	1569.31	3	4705.91	4704.91	1	0.8	223	Specific	696.94	696.94	337.59	10.37	196	>sp|P07911|UROM_HUMAN Uromodulin OS=Homo sapiens OX=9606 GN=UMOD PE=1 SV=1	1	20230315_zy_umod_t-before.17286.17286.3	controllerType=0 controllerNumber=1 scan=17286	64.1162
R.C[+57.021]NTAAPM[+15.995]WLN[+2204.772]GTHPSSDEGIVSR.K	HexNAc(4)Hex(5)NeuAc(2)	C[+57], M[+16], N[+2205]	1574.31	3	4720.91	4720.9	0	2.2	223	Specific	711.65	711.65	162.55	11.5	196	>sp|P07911|UROM_HUMAN Uromodulin OS=Homo sapiens OX=9606 GN=UMOD PE=1 SV=1	1	20230315_zy_umod_t-before.14913.14913.3	controllerType=0 controllerNumber=1 scan=14913	55.6749
R.C[+57.021]NTAAPMWLN[+2204.772]GTHPSSDEGIVSR.K	HexNAc(4)Hex(5)NeuAc(2)	C[+57], N[+2205]	1568.98	3	4704.92	4704.91	0	2.3	223	Specific	716.01	716.01	716.01	11.5	196	>sp|P07911|UROM_HUMAN Uromodulin OS=Homo sapiens OX=9606 GN=UMOD PE=1 SV=1	1	20230315_zy_umod_t-before.17410.17410.3	controllerType=0 controllerNumber=1 scan=17410	64.5207
R.C[+57.021]NTAAPM[+15.995]WLN[+2204.772]GTHPSSDEGIVSR.K	HexNAc(4)Hex(5)NeuAc(2)	C[+57], M[+16], N[+2205]	1180.98	4	4720.9	4720.9	0	0.5	223	Specific	719.39	719.39	166.72	11.47	196	>sp|P07911|UROM_HUMAN Uromodulin OS=Homo sapiens OX=9606 GN=UMOD PE=1 SV=1	1	20230315_zy_umod_t-before.15006.15006.4	controllerType=0 controllerNumber=1 scan=15006	56.0078
R.C[+57.021]NTAAPMWLN[+2204.772]GTHPSSDEGIVSR.K	HexNAc(4)Hex(5)NeuAc(2)	C[+57], N[+2205]	1568.97	3	4704.91	4704.91	0	0	223	Specific	747.91	747.91	747.91	11.91	196	>sp|P07911|UROM_HUMAN Uromodulin OS=Homo sapiens OX=9606 GN=UMOD PE=1 SV=1	1	20230315_zy_umod_t-before.17460.17460.3	controllerType=0 controllerNumber=1 scan=17460	64.6947
R.C[+57.021]NTAAPMWLN[+2204.772]GTHPSSDEGIVSR.K	HexNAc(4)Hex(5)NeuAc(2)	C[+57], N[+2205]	1568.97	3	4704.91	4704.91	0	0.8	223	Specific	764.61	764.61	764.61	12.91	196	>sp|P07911|UROM_HUMAN Uromodulin OS=Homo sapiens OX=9606 GN=UMOD PE=1 SV=1	1	20230315_zy_umod_t-before.17432.17432.3	controllerType=0 controllerNumber=1 scan=17432	64.5988
R.C[+57.021]NTAAPM[+15.995]WLN[+2204.772]GTHPSSDEGIVSR.K	HexNAc(4)Hex(5)NeuAc(2)	C[+57], M[+16], N[+2205]	1180.73	4	4719.9	4720.9	-1	0.8	223	Specific	773.91	773.91	773.91	12.47	196	>sp|P07911|UROM_HUMAN Uromodulin OS=Homo sapiens OX=9606 GN=UMOD PE=1 SV=1	1	20230315_zy_umod_t-before.14985.14985.4	controllerType=0 controllerNumber=1 scan=14985	55.9355
R.C[+57.021]NTAAPM[+15.995]WLN[+2204.772]GTHPSSDEGIVSR.K	HexNAc(4)Hex(5)NeuAc(2)	C[+57], M[+16], N[+2205]	1180.98	4	4720.9	4720.9	0	0.5	223	Specific	790.27	790.27	195.51	12.47	196	>sp|P07911|UROM_HUMAN Uromodulin OS=Homo sapiens OX=9606 GN=UMOD PE=1 SV=1	1	20230315_zy_umod_t-before.14891.14891.4	controllerType=0 controllerNumber=1 scan=14891	55.5901
R.C[+57.021]NTAAPMWLN[+2204.772]GTHPSSDEGIVSR.K	HexNAc(4)Hex(5)NeuAc(2)	C[+57], N[+2205]	1176.98	4	4704.91	4704.91	0	1.5	223	Specific	818.56	818.56	818.56	13.11	196	>sp|P07911|UROM_HUMAN Uromodulin OS=Homo sapiens OX=9606 GN=UMOD PE=1 SV=1	1	20230315_zy_umod_t-before.17448.17448.4	controllerType=0 controllerNumber=1 scan=17448	64.653
R.C[+57.021]NTAAPMWLN[+2204.772]GTHPSSDEGIVSR.K	HexNAc(4)Hex(5)NeuAc(2)	C[+57], N[+2205]	1176.98	4	4704.91	4704.91	0	0.8	223	Specific	825.24	825.24	825.24	13.47	196	>sp|P07911|UROM_HUMAN Uromodulin OS=Homo sapiens OX=9606 GN=UMOD PE=1 SV=1	1	20230315_zy_umod_t-before.17287.17287.4	controllerType=0 controllerNumber=1 scan=17287	64.1174
R.C[+57.021]NTAAPM[+15.995]WLN[+1784.634]GTHPSSDEGIVSR.K	HexNAc(4)Hex(6)	C[+57], M[+16], N[+1785]	1434.59	3	4301.74	4300.76	1	-5.7	223	Specific	490.11	490.11	490.11	7.66	196	>sp|P07911|UROM_HUMAN Uromodulin OS=Homo sapiens OX=9606 GN=UMOD PE=1 SV=1	1	20230315_zy_umod_t-before.13663.13663.3	controllerType=0 controllerNumber=1 scan=13663	51.0215
R.C[+57.021]NTAAPM[+15.995]WLN[+1930.692]GTHPSSDEGIVSR.K	HexNAc(4)Hex(6)Fuc(1)	C[+57], M[+16], N[+1931]	1482.94	3	4446.8	4446.82	0	-4	223	Specific	215.46	201.64	16.83	5.15	196	>sp|P07911|UROM_HUMAN Uromodulin OS=Homo sapiens OX=9606 GN=UMOD PE=1 SV=1	1	20230315_zy_umod_t-before.12372.12372.3	controllerType=0 controllerNumber=1 scan=12372	46.1062
R.C[+57.021]NTAAPM[+15.995]WLN[+2221.788]GTHPSSDEGIVSR.K	HexNAc(4)Hex(6)Fuc(1)NeuAc(1)	C[+57], M[+16], N[+2222]	1579.64	3	4736.89	4737.92	-1	-4.1	223	Specific	419.83	419.83	65.27	7.48	196	>sp|P07911|UROM_HUMAN Uromodulin OS=Homo sapiens OX=9606 GN=UMOD PE=1 SV=1	1	20230315_zy_umod_t-before.14004.14004.3	controllerType=0 controllerNumber=1 scan=14004	52.3241
R.C[+57.021]NTAAPM[+15.995]WLN[+2221.788]GTHPSSDEGIVSR.K	HexNAc(4)Hex(6)Fuc(1)NeuAc(1)	C[+57], M[+16], N[+2222]	1184.98	4	4736.91	4737.92	-1	-1.8	223	Specific	420.02	420.02	12.37	7.04	196	>sp|P07911|UROM_HUMAN Uromodulin OS=Homo sapiens OX=9606 GN=UMOD PE=1 SV=1	1	20230315_zy_umod_t-before.14003.14003.4	controllerType=0 controllerNumber=1 scan=14003	52.3206
R.C[+57.021]NTAAPM[+15.995]WLN[+2075.730]GTHPSSDEGIVSR.K	HexNAc(4)Hex(6)NeuAc(1)	C[+57], M[+16], N[+2076]	1531.28	3	4591.83	4591.86	0	-5.6	223	Specific	417.66	417.66	417.66	7.48	196	>sp|P07911|UROM_HUMAN Uromodulin OS=Homo sapiens OX=9606 GN=UMOD PE=1 SV=1	1	20230315_zy_umod_t-before.12410.12410.3	controllerType=0 controllerNumber=1 scan=12410	46.2566
R.C[+57.021]NTAAPMWLN[+2092.745]GTHPSSDEGIVSR.K	HexNAc(4)Hex(7)Fuc(1)	C[+57], N[+2093]	1149.23	4	4593.89	4592.88	1	2.1	223	Specific	254.26	254.26	254.26	4.66	196	>sp|P07911|UROM_HUMAN Uromodulin OS=Homo sapiens OX=9606 GN=UMOD PE=1 SV=1	1	20230315_zy_umod_t-before.17809.17809.4	controllerType=0 controllerNumber=1 scan=17809	65.9855
R.C[+57.021]NTAAPMWLN[+1938.709]GTHPSSDEGIVSR.K	HexNAc(5)Hex(3)Fuc(1)NeuAc(1)	C[+57], N[+1939]	1479.94	3	4437.82	4438.84	-1	-4.6	223	Specific	398.31	398.31	398.31	6.23	196	>sp|P07911|UROM_HUMAN Uromodulin OS=Homo sapiens OX=9606 GN=UMOD PE=1 SV=1	1	20230315_zy_umod_t-before.18815.18815.3	controllerType=0 controllerNumber=1 scan=18815	69.4345
R.C[+57.021]NTAAPMWLN[+1663.608]GTHPSSDEGIVSR.K	HexNAc(5)Hex(4)	C[+57], N[+1664]	1041.7	4	4163.76	4163.74	0	3.9	223	Specific	387.09	387.09	307.29	5.71	196	>sp|P07911|UROM_HUMAN Uromodulin OS=Homo sapiens OX=9606 GN=UMOD PE=1 SV=1	1	20230315_zy_umod_t-before.13650.13650.4	controllerType=0 controllerNumber=1 scan=13650	50.97
R.C[+57.021]NTAAPMWLN[+1663.608]GTHPSSDEGIVSR.K	HexNAc(5)Hex(4)	C[+57], N[+1664]	1388.59	3	4163.75	4163.74	0	2.4	223	Specific	511.76	511.76	201.1	7.24	196	>sp|P07911|UROM_HUMAN Uromodulin OS=Homo sapiens OX=9606 GN=UMOD PE=1 SV=1	1	20230315_zy_umod_t-before.13638.13638.3	controllerType=0 controllerNumber=1 scan=13638	50.9224
R.C[+57.021]NTAAPMWLN[+1663.608]GTHPSSDEGIVSR.K	HexNAc(5)Hex(4)	C[+57], N[+1664]	1388.59	3	4163.75	4163.74	0	2.5	223	Specific	665.35	665.35	275.11	10.5	196	>sp|P07911|UROM_HUMAN Uromodulin OS=Homo sapiens OX=9606 GN=UMOD PE=1 SV=1	1	20230315_zy_umod_t-before.13647.13647.3	controllerType=0 controllerNumber=1 scan=13647	50.9617
R.C[+57.021]NTAAPMWLN[+1809.666]GTHPSSDEGIVSR.K	HexNAc(5)Hex(4)Fuc(1)	C[+57], N[+1810]	1437.27	3	4309.8	4309.8	0	-0.2	223	Specific	582.86	582.86	582.86	8.91	196	>sp|P07911|UROM_HUMAN Uromodulin OS=Homo sapiens OX=9606 GN=UMOD PE=1 SV=1	1	20230315_zy_umod_t-before.13459.13459.3	controllerType=0 controllerNumber=1 scan=13459	50.2486
R.C[+57.021]NTAAPMWLN[+2100.761]GTHPSSDEGIVSR.K	HexNAc(5)Hex(4)Fuc(1)NeuAc(1)	C[+57], N[+2101]	1534.31	3	4600.9	4600.9	0	1.2	223	Specific	245.97	245.97	245.97	4.87	196	>sp|P07911|UROM_HUMAN Uromodulin OS=Homo sapiens OX=9606 GN=UMOD PE=1 SV=1	1	20230315_zy_umod_t-before.15066.15066.3	controllerType=0 controllerNumber=1 scan=15066	56.2249
R.C[+57.021]NTAAPMWLN[+2100.761]GTHPSSDEGIVSR.K	HexNAc(5)Hex(4)Fuc(1)NeuAc(1)	C[+57], N[+2101]	1534.31	3	4600.91	4600.9	0	3.3	223	Specific	268.86	268.86	268.86	4.45	196	>sp|P07911|UROM_HUMAN Uromodulin OS=Homo sapiens OX=9606 GN=UMOD PE=1 SV=1	1	20230315_zy_umod_t-before.14935.14935.3	controllerType=0 controllerNumber=1 scan=14935	55.7497
R.C[+57.021]NTAAPMWLN[+2100.761]GTHPSSDEGIVSR.K	HexNAc(5)Hex(4)Fuc(1)NeuAc(1)	C[+57], N[+2101]	1150.72	4	4599.87	4600.9	-1	-5.5	223	Specific	279.21	279.21	279.21	5.07	196	>sp|P07911|UROM_HUMAN Uromodulin OS=Homo sapiens OX=9606 GN=UMOD PE=1 SV=1	1	20230315_zy_umod_t-before.16868.16868.4	controllerType=0 controllerNumber=1 scan=16868	62.5857
R.C[+57.021]NTAAPMWLN[+2100.761]GTHPSSDEGIVSR.K	HexNAc(5)Hex(4)Fuc(1)NeuAc(1)	C[+57], N[+2101]	1534.63	3	4601.88	4600.9	1	-4.1	223	Specific	296.89	296.89	296.89	5.53	196	>sp|P07911|UROM_HUMAN Uromodulin OS=Homo sapiens OX=9606 GN=UMOD PE=1 SV=1	1	20230315_zy_umod_t-before.17050.17050.3	controllerType=0 controllerNumber=1 scan=17050	63.2558
R.C[+57.021]NTAAPM[+15.995]WLN[+2100.761]GTHPSSDEGIVSR.K	HexNAc(5)Hex(4)Fuc(1)NeuAc(1)	C[+57], M[+16], N[+2101]	1154.98	4	4616.91	4616.89	0	3.3	223	Specific	317.65	317.65	210.7	4.19	196	>sp|P07911|UROM_HUMAN Uromodulin OS=Homo sapiens OX=9606 GN=UMOD PE=1 SV=1	1	20230315_zy_umod_t-before.13217.13217.4	controllerType=0 controllerNumber=1 scan=13217	49.3403
R.C[+57.021]NTAAPMWLN[+2100.761]GTHPSSDEGIVSR.K	HexNAc(5)Hex(4)Fuc(1)NeuAc(1)	C[+57], N[+2101]	1533.96	3	4599.87	4600.9	-1	-4.6	223	Specific	412.42	412.42	412.42	7.48	196	>sp|P07911|UROM_HUMAN Uromodulin OS=Homo sapiens OX=9606 GN=UMOD PE=1 SV=1	1	20230315_zy_umod_t-before.16891.16891.3	controllerType=0 controllerNumber=1 scan=16891	62.6779
R.C[+57.021]NTAAPMWLN[+2100.761]GTHPSSDEGIVSR.K	HexNAc(5)Hex(4)Fuc(1)NeuAc(1)	C[+57], N[+2101]	1150.72	4	4599.87	4600.9	-1	-4.4	223	Specific	435.84	435.84	435.84	7.04	196	>sp|P07911|UROM_HUMAN Uromodulin OS=Homo sapiens OX=9606 GN=UMOD PE=1 SV=1	1	20230315_zy_umod_t-before.16880.16880.4	controllerType=0 controllerNumber=1 scan=16880	62.6338
R.C[+57.021]NTAAPMWLN[+2100.761]GTHPSSDEGIVSR.K	HexNAc(5)Hex(4)Fuc(1)NeuAc(1)	C[+57], N[+2101]	1534.3	3	4600.89	4600.9	0	-0.9	223	Specific	442.19	442.19	442.19	7.64	196	>sp|P07911|UROM_HUMAN Uromodulin OS=Homo sapiens OX=9606 GN=UMOD PE=1 SV=1	1	20230315_zy_umod_t-before.15149.15149.3	controllerType=0 controllerNumber=1 scan=15149	56.5281
R.C[+57.021]NTAAPM[+15.995]WLN[+2100.761]GTHPSSDEGIVSR.K	HexNAc(5)Hex(4)Fuc(1)NeuAc(1)	C[+57], M[+16], N[+2101]	1539.64	3	4616.89	4616.89	0	0.8	223	Specific	445.83	445.83	148.38	7.1	196	>sp|P07911|UROM_HUMAN Uromodulin OS=Homo sapiens OX=9606 GN=UMOD PE=1 SV=1	1	20230315_zy_umod_t-before.13202.13202.3	controllerType=0 controllerNumber=1 scan=13202	49.2852
R.C[+57.021]NTAAPMWLN[+2100.761]GTHPSSDEGIVSR.K	HexNAc(5)Hex(4)Fuc(1)NeuAc(1)	C[+57], N[+2101]	1534.31	3	4600.9	4600.9	0	1.9	223	Specific	597.83	597.83	597.83	8.54	196	>sp|P07911|UROM_HUMAN Uromodulin OS=Homo sapiens OX=9606 GN=UMOD PE=1 SV=1	1	20230315_zy_umod_t-before.14961.14961.3	controllerType=0 controllerNumber=1 scan=14961	55.843
R.C[+57.021]NTAAPM[+15.995]WLN[+2100.761]GTHPSSDEGIVSR.K	HexNAc(5)Hex(4)Fuc(1)NeuAc(1)	C[+57], M[+16], N[+2101]	1539.64	3	4616.9	4616.89	0	1.2	223	Specific	603.71	603.71	127.41	9.37	196	>sp|P07911|UROM_HUMAN Uromodulin OS=Homo sapiens OX=9606 GN=UMOD PE=1 SV=1	1	20230315_zy_umod_t-before.12872.12872.3	controllerType=0 controllerNumber=1 scan=12872	48.0271
R.C[+57.021]NTAAPM[+15.995]WLN[+2100.761]GTHPSSDEGIVSR.K	HexNAc(5)Hex(4)Fuc(1)NeuAc(1)	C[+57], M[+16], N[+2101]	1539.64	3	4616.9	4616.89	0	2.3	223	Specific	614.23	614.23	100.74	9.5	196	>sp|P07911|UROM_HUMAN Uromodulin OS=Homo sapiens OX=9606 GN=UMOD PE=1 SV=1	1	20230315_zy_umod_t-before.13084.13084.3	controllerType=0 controllerNumber=1 scan=13084	48.8328
R.C[+57.021]NTAAPM[+15.995]WLN[+2100.761]GTHPSSDEGIVSR.K	HexNAc(5)Hex(4)Fuc(1)NeuAc(1)	C[+57], M[+16], N[+2101]	1154.98	4	4616.89	4616.89	0	0.6	223	Specific	614.29	614.29	192.57	9.47	196	>sp|P07911|UROM_HUMAN Uromodulin OS=Homo sapiens OX=9606 GN=UMOD PE=1 SV=1	1	20230315_zy_umod_t-before.13085.13085.4	controllerType=0 controllerNumber=1 scan=13085	48.8358
R.C[+57.021]NTAAPM[+15.995]WLN[+2100.761]GTHPSSDEGIVSR.K	HexNAc(5)Hex(4)Fuc(1)NeuAc(1)	C[+57], M[+16], N[+2101]	1539.64	3	4616.9	4616.89	0	2.4	223	Specific	672.07	672.07	85.3	10.5	196	>sp|P07911|UROM_HUMAN Uromodulin OS=Homo sapiens OX=9606 GN=UMOD PE=1 SV=1	1	20230315_zy_umod_t-before.12962.12962.3	controllerType=0 controllerNumber=1 scan=12962	48.3727
R.C[+57.021]NTAAPMWLN[+2100.761]GTHPSSDEGIVSR.K	HexNAc(5)Hex(4)Fuc(1)NeuAc(1)	C[+57], N[+2101]	1150.98	4	4600.89	4600.9	0	-0.2	223	Specific	717.74	717.74	717.74	11.47	196	>sp|P07911|UROM_HUMAN Uromodulin OS=Homo sapiens OX=9606 GN=UMOD PE=1 SV=1	1	20230315_zy_umod_t-before.15129.15129.4	controllerType=0 controllerNumber=1 scan=15129	56.4598
R.C[+57.021]NTAAPM[+15.995]WLN[+2100.761]GTHPSSDEGIVSR.K	HexNAc(5)Hex(4)Fuc(1)NeuAc(1)	C[+57], M[+16], N[+2101]	1154.98	4	4616.89	4616.89	0	-0.8	223	Specific	736.75	736.75	289.46	11.47	196	>sp|P07911|UROM_HUMAN Uromodulin OS=Homo sapiens OX=9606 GN=UMOD PE=1 SV=1	1	20230315_zy_umod_t-before.12871.12871.4	controllerType=0 controllerNumber=1 scan=12871	48.0239
R.C[+57.021]NTAAPM[+15.995]WLN[+2100.761]GTHPSSDEGIVSR.K	HexNAc(5)Hex(4)Fuc(1)NeuAc(1)	C[+57], M[+16], N[+2101]	1154.98	4	4616.89	4616.89	0	0.7	223	Specific	742.63	742.63	169.07	11.47	196	>sp|P07911|UROM_HUMAN Uromodulin OS=Homo sapiens OX=9606 GN=UMOD PE=1 SV=1	1	20230315_zy_umod_t-before.12903.12903.4	controllerType=0 controllerNumber=1 scan=12903	48.1417
R.C[+57.021]NTAAPM[+15.995]WLN[+2100.761]GTHPSSDEGIVSR.K	HexNAc(5)Hex(4)Fuc(1)NeuAc(1)	C[+57], M[+16], N[+2101]	1154.98	4	4616.89	4616.89	0	0.7	223	Specific	764.73	764.73	299.48	12.47	196	>sp|P07911|UROM_HUMAN Uromodulin OS=Homo sapiens OX=9606 GN=UMOD PE=1 SV=1	1	20230315_zy_umod_t-before.12975.12975.4	controllerType=0 controllerNumber=1 scan=12975	48.4219
R.C[+57.021]NTAAPMWLN[+2100.761]GTHPSSDEGIVSR.K	HexNAc(5)Hex(4)Fuc(1)NeuAc(1)	C[+57], N[+2101]	1534.31	3	4600.91	4600.9	0	2.3	223	Specific	814.37	814.37	814.37	13.5	196	>sp|P07911|UROM_HUMAN Uromodulin OS=Homo sapiens OX=9606 GN=UMOD PE=1 SV=1	1	20230315_zy_umod_t-before.15102.15102.3	controllerType=0 controllerNumber=1 scan=15102	56.3597
R.C[+57.021]NTAAPM[+15.995]WLN[+2100.761]GTHPSSDEGIVSR.K	HexNAc(5)Hex(4)Fuc(1)NeuAc(1)	C[+57], M[+16], N[+2101]	1154.98	4	4616.9	4616.89	0	1.2	223	Specific	821.88	821.88	168.59	12.93	196	>sp|P07911|UROM_HUMAN Uromodulin OS=Homo sapiens OX=9606 GN=UMOD PE=1 SV=1	1	20230315_zy_umod_t-before.12981.12981.4	controllerType=0 controllerNumber=1 scan=12981	48.4382
R.C[+57.021]NTAAPMWLN[+2100.761]GTHPSSDEGIVSR.K	HexNAc(5)Hex(4)Fuc(1)NeuAc(1)	C[+57], N[+2101]	1534.31	3	4600.9	4600.9	0	1.3	223	Specific	835.88	835.88	835.88	13.37	196	>sp|P07911|UROM_HUMAN Uromodulin OS=Homo sapiens OX=9606 GN=UMOD PE=1 SV=1	1	20230315_zy_umod_t-before.14957.14957.3	controllerType=0 controllerNumber=1 scan=14957	55.8327
R.C[+57.021]NTAAPMWLN[+2100.761]GTHPSSDEGIVSR.K	HexNAc(5)Hex(4)Fuc(1)NeuAc(1)	C[+57], N[+2101]	1150.98	4	4600.9	4600.9	0	-0.1	223	Specific	900.78	900.78	900.78	15.47	196	>sp|P07911|UROM_HUMAN Uromodulin OS=Homo sapiens OX=9606 GN=UMOD PE=1 SV=1	1	20230315_zy_umod_t-before.14955.14955.4	controllerType=0 controllerNumber=1 scan=14955	55.8266
R.C[+57.021]NTAAPMWLN[+2391.857]GTHPSSDEGIVSR.K	HexNAc(5)Hex(4)Fuc(1)NeuAc(2)	C[+57], N[+2392]	1223.5	4	4890.97	4891.99	-1	-4	223	Specific	219.15	219.15	219.15	2.95	196	>sp|P07911|UROM_HUMAN Uromodulin OS=Homo sapiens OX=9606 GN=UMOD PE=1 SV=1	1	20230315_zy_umod_t-before.15045.15045.4	controllerType=0 controllerNumber=1 scan=15045	56.1508
R.C[+57.021]NTAAPM[+15.995]WLN[+2391.857]GTHPSSDEGIVSR.K	HexNAc(5)Hex(4)Fuc(1)NeuAc(2)	C[+57], M[+16], N[+2392]	1227.5	4	4906.99	4907.99	-1	0.7	223	Specific	223.03	223.03	121.79	4.71	196	>sp|P07911|UROM_HUMAN Uromodulin OS=Homo sapiens OX=9606 GN=UMOD PE=1 SV=1	1	20230315_zy_umod_t-before.14420.14420.4	controllerType=0 controllerNumber=1 scan=14420	53.8955
R.C[+57.021]NTAAPMWLN[+2391.857]GTHPSSDEGIVSR.K	HexNAc(5)Hex(4)Fuc(1)NeuAc(2)	C[+57], N[+2392]	1223.5	4	4890.96	4891.99	-1	-5.4	223	Specific	301.03	301.03	301.03	3.93	196	>sp|P07911|UROM_HUMAN Uromodulin OS=Homo sapiens OX=9606 GN=UMOD PE=1 SV=1	1	20230315_zy_umod_t-before.15034.15034.4	controllerType=0 controllerNumber=1 scan=15034	56.1099
R.C[+57.021]NTAAPMWLN[+2391.857]GTHPSSDEGIVSR.K	HexNAc(5)Hex(4)Fuc(1)NeuAc(2)	C[+57], N[+2392]	1223.5	4	4890.97	4891.99	-1	-4.3	223	Specific	303.87	303.87	303.87	3.93	196	>sp|P07911|UROM_HUMAN Uromodulin OS=Homo sapiens OX=9606 GN=UMOD PE=1 SV=1	1	20230315_zy_umod_t-before.15048.15048.4	controllerType=0 controllerNumber=1 scan=15048	56.1581
R.C[+57.021]NTAAPMWLN[+2391.857]GTHPSSDEGIVSR.K	HexNAc(5)Hex(4)Fuc(1)NeuAc(2)	C[+57], N[+2392]	1630.99	3	4890.96	4891.99	-1	-5.3	223	Specific	337.48	337.48	337.48	5.99	196	>sp|P07911|UROM_HUMAN Uromodulin OS=Homo sapiens OX=9606 GN=UMOD PE=1 SV=1	1	20230315_zy_umod_t-before.18260.18260.3	controllerType=0 controllerNumber=1 scan=18260	67.5408
R.C[+57.021]NTAAPM[+15.995]WLN[+2391.857]GTHPSSDEGIVSR.K	HexNAc(5)Hex(4)Fuc(1)NeuAc(2)	C[+57], M[+16], N[+2392]	1227.75	4	4907.99	4907.99	0	1.5	223	Specific	379.23	379.23	117.91	6.59	196	>sp|P07911|UROM_HUMAN Uromodulin OS=Homo sapiens OX=9606 GN=UMOD PE=1 SV=1	1	20230315_zy_umod_t-before.14307.14307.4	controllerType=0 controllerNumber=1 scan=14307	53.4709
R.C[+57.021]NTAAPM[+15.995]WLN[+2391.857]GTHPSSDEGIVSR.K	HexNAc(5)Hex(4)Fuc(1)NeuAc(2)	C[+57], M[+16], N[+2392]	1636.67	3	4907.99	4907.99	0	1.5	223	Specific	575.05	575.05	84.64	8.54	196	>sp|P07911|UROM_HUMAN Uromodulin OS=Homo sapiens OX=9606 GN=UMOD PE=1 SV=1	1	20230315_zy_umod_t-before.14507.14507.3	controllerType=0 controllerNumber=1 scan=14507	54.2185
R.C[+57.021]NTAAPMWLN[+2391.857]GTHPSSDEGIVSR.K	HexNAc(5)Hex(4)Fuc(1)NeuAc(2)	C[+57], N[+2392]	1631.34	3	4892.02	4891.99	0	5.1	223	Specific	583.02	583.02	583.02	7.37	196	>sp|P07911|UROM_HUMAN Uromodulin OS=Homo sapiens OX=9606 GN=UMOD PE=1 SV=1	1	20230315_zy_umod_t-before.16808.16808.3	controllerType=0 controllerNumber=1 scan=16808	62.3685
R.C[+57.021]NTAAPM[+15.995]WLN[+2391.857]GTHPSSDEGIVSR.K	HexNAc(5)Hex(4)Fuc(1)NeuAc(2)	C[+57], M[+16], N[+2392]	1227.75	4	4907.99	4907.99	0	0.6	223	Specific	602.32	602.32	233.1	9.47	196	>sp|P07911|UROM_HUMAN Uromodulin OS=Homo sapiens OX=9606 GN=UMOD PE=1 SV=1	1	20230315_zy_umod_t-before.14313.14313.4	controllerType=0 controllerNumber=1 scan=14313	53.4964
R.C[+57.021]NTAAPM[+15.995]WLN[+2391.857]GTHPSSDEGIVSR.K	HexNAc(5)Hex(4)Fuc(1)NeuAc(2)	C[+57], M[+16], N[+2392]	1227.75	4	4908	4907.99	0	2	223	Specific	603.2	603.2	161.51	9.06	196	>sp|P07911|UROM_HUMAN Uromodulin OS=Homo sapiens OX=9606 GN=UMOD PE=1 SV=1	1	20230315_zy_umod_t-before.14525.14525.4	controllerType=0 controllerNumber=1 scan=14525	54.2816
R.C[+57.021]NTAAPMWLN[+2391.857]GTHPSSDEGIVSR.K	HexNAc(5)Hex(4)Fuc(1)NeuAc(2)	C[+57], N[+2392]	1223.76	4	4892.01	4891.99	0	3.3	223	Specific	621.87	621.87	621.87	8.41	196	>sp|P07911|UROM_HUMAN Uromodulin OS=Homo sapiens OX=9606 GN=UMOD PE=1 SV=1	1	20230315_zy_umod_t-before.16807.16807.4	controllerType=0 controllerNumber=1 scan=16807	62.3655
R.C[+57.021]NTAAPM[+15.995]WLN[+2391.857]GTHPSSDEGIVSR.K	HexNAc(5)Hex(4)Fuc(1)NeuAc(2)	C[+57], M[+16], N[+2392]	1227.75	4	4907.99	4907.99	0	1.7	223	Specific	722.72	722.72	286.91	11.11	196	>sp|P07911|UROM_HUMAN Uromodulin OS=Homo sapiens OX=9606 GN=UMOD PE=1 SV=1	1	20230315_zy_umod_t-before.14506.14506.4	controllerType=0 controllerNumber=1 scan=14506	54.2156
R.C[+57.021]NTAAPM[+15.995]WLN[+2391.857]GTHPSSDEGIVSR.K	HexNAc(5)Hex(4)Fuc(1)NeuAc(2)	C[+57], M[+16], N[+2392]	1227.75	4	4907.99	4907.99	0	0.3	223	Specific	734.44	734.44	285.2	11.47	196	>sp|P07911|UROM_HUMAN Uromodulin OS=Homo sapiens OX=9606 GN=UMOD PE=1 SV=1	1	20230315_zy_umod_t-before.14492.14492.4	controllerType=0 controllerNumber=1 scan=14492	54.1638
R.C[+57.021]NTAAPMWLN[+2391.857]GTHPSSDEGIVSR.K	HexNAc(5)Hex(4)Fuc(1)NeuAc(2)	C[+57], N[+2392]	1631	3	4891	4891.99	-1	1.6	223	Specific	791.28	791.28	791.28	12.54	196	>sp|P07911|UROM_HUMAN Uromodulin OS=Homo sapiens OX=9606 GN=UMOD PE=1 SV=1	1	20230315_zy_umod_t-before.17018.17018.3	controllerType=0 controllerNumber=1 scan=17018	63.1441
R.C[+57.021]NTAAPMWLN[+2391.857]GTHPSSDEGIVSR.K	HexNAc(5)Hex(4)Fuc(1)NeuAc(2)	C[+57], N[+2392]	1223.75	4	4891.99	4891.99	0	0.1	223	Specific	864.98	864.98	864.98	14.47	196	>sp|P07911|UROM_HUMAN Uromodulin OS=Homo sapiens OX=9606 GN=UMOD PE=1 SV=1	1	20230315_zy_umod_t-before.17017.17017.4	controllerType=0 controllerNumber=1 scan=17017	63.1418
R.C[+57.021]NTAAPMWLN[+2391.857]GTHPSSDEGIVSR.K	HexNAc(5)Hex(4)Fuc(1)NeuAc(2)	C[+57], N[+2392]	1223.76	4	4892	4891.99	0	1.6	223	Specific	882.96	882.96	882.96	14.11	196	>sp|P07911|UROM_HUMAN Uromodulin OS=Homo sapiens OX=9606 GN=UMOD PE=1 SV=1	1	20230315_zy_umod_t-before.16998.16998.4	controllerType=0 controllerNumber=1 scan=16998	63.0674
R.C[+57.021]NTAAPMWLN[+1954.704]GTHPSSDEGIVSR.K	HexNAc(5)Hex(4)NeuAc(1)	C[+57], N[+1955]	1485.62	3	4454.84	4454.84	0	0.7	223	Specific	248.08	248.08	91.76	5.41	196	>sp|P07911|UROM_HUMAN Uromodulin OS=Homo sapiens OX=9606 GN=UMOD PE=1 SV=1	1	20230315_zy_umod_t-before.18895.18895.3	controllerType=0 controllerNumber=1 scan=18895	69.7014
R.C[+57.021]NTAAPM[+15.995]WLN[+1954.704]GTHPSSDEGIVSR.K	HexNAc(5)Hex(4)NeuAc(1)	C[+57], M[+16], N[+1955]	1118.47	4	4470.84	4470.83	0	2.1	223	Specific	261.48	261.48	46.34	2.9	196	>sp|P07911|UROM_HUMAN Uromodulin OS=Homo sapiens OX=9606 GN=UMOD PE=1 SV=1	1	20230315_zy_umod_t-before.10106.10106.4	controllerType=0 controllerNumber=1 scan=10106	37.5408
R.C[+57.021]NTAAPMWLN[+1954.704]GTHPSSDEGIVSR.K	HexNAc(5)Hex(4)NeuAc(1)	C[+57], N[+1955]	1114.47	4	4454.84	4454.84	0	0.3	223	Specific	320.51	320.51	178.94	5.56	196	>sp|P07911|UROM_HUMAN Uromodulin OS=Homo sapiens OX=9606 GN=UMOD PE=1 SV=1	1	20230315_zy_umod_t-before.15343.15343.4	controllerType=0 controllerNumber=1 scan=15343	57.2121
R.C[+57.021]NTAAPMWLN[+1954.704]GTHPSSDEGIVSR.K	HexNAc(5)Hex(4)NeuAc(1)	C[+57], N[+1955]	1485.28	3	4453.81	4454.84	-1	-5.1	223	Specific	339.23	339.23	101.79	5.99	196	>sp|P07911|UROM_HUMAN Uromodulin OS=Homo sapiens OX=9606 GN=UMOD PE=1 SV=1	1	20230315_zy_umod_t-before.17402.17402.3	controllerType=0 controllerNumber=1 scan=17402	64.4918
R.C[+57.021]NTAAPM[+15.995]WLN[+1954.704]GTHPSSDEGIVSR.K	HexNAc(5)Hex(4)NeuAc(1)	C[+57], M[+16], N[+1955]	1491.28	3	4471.83	4470.83	1	-1.8	223	Specific	353.41	353.41	234.71	6.14	196	>sp|P07911|UROM_HUMAN Uromodulin OS=Homo sapiens OX=9606 GN=UMOD PE=1 SV=1	1	20230315_zy_umod_t-before.13552.13552.3	controllerType=0 controllerNumber=1 scan=13552	50.6015
R.C[+57.021]NTAAPM[+15.995]WLN[+1954.704]GTHPSSDEGIVSR.K	HexNAc(5)Hex(4)NeuAc(1)	C[+57], M[+16], N[+1955]	1490.95	3	4470.84	4470.83	0	1.7	223	Specific	365.69	347.82	128.14	5.75	196	>sp|P07911|UROM_HUMAN Uromodulin OS=Homo sapiens OX=9606 GN=UMOD PE=1 SV=1	1	20230315_zy_umod_t-before.13410.13410.3	controllerType=0 controllerNumber=1 scan=13410	50.0583
R.C[+57.021]NTAAPMWLN[+1954.704]GTHPSSDEGIVSR.K	HexNAc(5)Hex(4)NeuAc(1)	C[+57], N[+1955]	1485.95	3	4455.85	4454.84	1	1.4	223	Specific	379.24	379.24	162.52	7.03	196	>sp|P07911|UROM_HUMAN Uromodulin OS=Homo sapiens OX=9606 GN=UMOD PE=1 SV=1	1	20230315_zy_umod_t-before.15226.15226.3	controllerType=0 controllerNumber=1 scan=15226	56.8071
R.C[+57.021]NTAAPMWLN[+1954.704]GTHPSSDEGIVSR.K	HexNAc(5)Hex(4)NeuAc(1)	C[+57], N[+1955]	1485.61	3	4454.81	4454.84	0	-5.3	223	Specific	383.92	383.92	107.2	7.39	196	>sp|P07911|UROM_HUMAN Uromodulin OS=Homo sapiens OX=9606 GN=UMOD PE=1 SV=1	1	20230315_zy_umod_t-before.17414.17414.3	controllerType=0 controllerNumber=1 scan=17414	64.533
R.C[+57.021]NTAAPM[+15.995]WLN[+1954.704]GTHPSSDEGIVSR.K	HexNAc(5)Hex(4)NeuAc(1)	C[+57], M[+16], N[+1955]	1490.95	3	4470.84	4470.83	0	2.1	223	Specific	414.91	414.91	137.59	7.07	196	>sp|P07911|UROM_HUMAN Uromodulin OS=Homo sapiens OX=9606 GN=UMOD PE=1 SV=1	1	20230315_zy_umod_t-before.13219.13219.3	controllerType=0 controllerNumber=1 scan=13219	49.3447
R.C[+57.021]NTAAPM[+15.995]WLN[+1954.704]GTHPSSDEGIVSR.K	HexNAc(5)Hex(4)NeuAc(1)	C[+57], M[+16], N[+1955]	1490.95	3	4470.84	4470.83	0	1.9	223	Specific	501.5	467.92	112.87	7.29	196	>sp|P07911|UROM_HUMAN Uromodulin OS=Homo sapiens OX=9606 GN=UMOD PE=1 SV=1	1	20230315_zy_umod_t-before.13356.13356.3	controllerType=0 controllerNumber=1 scan=13356	49.8543
R.C[+57.021]NTAAPM[+15.995]WLN[+1954.704]GTHPSSDEGIVSR.K	HexNAc(5)Hex(4)NeuAc(1)	C[+57], M[+16], N[+1955]	1490.95	3	4470.84	4470.83	0	2.1	223	Specific	501.97	490.05	191.13	7.24	196	>sp|P07911|UROM_HUMAN Uromodulin OS=Homo sapiens OX=9606 GN=UMOD PE=1 SV=1	1	20230315_zy_umod_t-before.13514.13514.3	controllerType=0 controllerNumber=1 scan=13514	50.4559
R.C[+57.021]NTAAPMWLN[+1954.704]GTHPSSDEGIVSR.K	HexNAc(5)Hex(4)NeuAc(1)	C[+57], N[+1955]	1485.62	3	4454.84	4454.84	0	0.7	223	Specific	569.65	569.65	221.94	8.91	196	>sp|P07911|UROM_HUMAN Uromodulin OS=Homo sapiens OX=9606 GN=UMOD PE=1 SV=1	1	20230315_zy_umod_t-before.15239.15239.3	controllerType=0 controllerNumber=1 scan=15239	56.846
R.C[+57.021]NTAAPM[+15.995]WLN[+1954.704]GTHPSSDEGIVSR.K	HexNAc(5)Hex(4)NeuAc(1)	C[+57], M[+16], N[+1955]	1490.95	3	4470.83	4470.83	0	-1.1	223	Specific	582.79	487.19	212.71	8.91	196	>sp|P07911|UROM_HUMAN Uromodulin OS=Homo sapiens OX=9606 GN=UMOD PE=1 SV=1	1	20230315_zy_umod_t-before.13393.13393.3	controllerType=0 controllerNumber=1 scan=13393	49.9975
R.C[+57.021]NTAAPMWLN[+1954.704]GTHPSSDEGIVSR.K	HexNAc(5)Hex(4)NeuAc(1)	C[+57], N[+1955]	1485.62	3	4454.85	4454.84	0	1.7	223	Specific	587.15	587.15	201.03	8.54	196	>sp|P07911|UROM_HUMAN Uromodulin OS=Homo sapiens OX=9606 GN=UMOD PE=1 SV=1	1	20230315_zy_umod_t-before.15424.15424.3	controllerType=0 controllerNumber=1 scan=15424	57.5075
R.C[+57.021]NTAAPM[+15.995]WLN[+1954.704]GTHPSSDEGIVSR.K	HexNAc(5)Hex(4)NeuAc(1)	C[+57], M[+16], N[+1955]	1490.95	3	4470.84	4470.83	0	0.8	223	Specific	631.12	613.62	203.98	9.91	196	>sp|P07911|UROM_HUMAN Uromodulin OS=Homo sapiens OX=9606 GN=UMOD PE=1 SV=1	1	20230315_zy_umod_t-before.13215.13215.3	controllerType=0 controllerNumber=1 scan=13215	49.3344
R.C[+57.021]NTAAPMWLN[+1954.704]GTHPSSDEGIVSR.K	HexNAc(5)Hex(4)NeuAc(1)	C[+57], N[+1955]	1114.21	4	4453.84	4454.84	-1	0.2	223	Specific	662.11	662.11	361.52	10.47	196	>sp|P07911|UROM_HUMAN Uromodulin OS=Homo sapiens OX=9606 GN=UMOD PE=1 SV=1	1	20230315_zy_umod_t-before.15380.15380.4	controllerType=0 controllerNumber=1 scan=15380	57.346
R.C[+57.021]NTAAPM[+15.995]WLN[+1954.704]GTHPSSDEGIVSR.K	HexNAc(5)Hex(4)NeuAc(1)	C[+57], M[+16], N[+1955]	1490.95	3	4470.83	4470.83	0	0.3	223	Specific	662.84	604.18	208.56	10.91	196	>sp|P07911|UROM_HUMAN Uromodulin OS=Homo sapiens OX=9606 GN=UMOD PE=1 SV=1	1	20230315_zy_umod_t-before.13430.13430.3	controllerType=0 controllerNumber=1 scan=13430	50.1408
R.C[+57.021]NTAAPMWLN[+1954.704]GTHPSSDEGIVSR.K	HexNAc(5)Hex(4)NeuAc(1)	C[+57], N[+1955]	1485.62	3	4454.85	4454.84	0	2.2	223	Specific	677.38	677.38	243.59	10.5	196	>sp|P07911|UROM_HUMAN Uromodulin OS=Homo sapiens OX=9606 GN=UMOD PE=1 SV=1	1	20230315_zy_umod_t-before.15362.15362.3	controllerType=0 controllerNumber=1 scan=15362	57.2826
R.C[+57.021]NTAAPM[+15.995]WLN[+1954.704]GTHPSSDEGIVSR.K	HexNAc(5)Hex(4)NeuAc(1)	C[+57], M[+16], N[+1955]	1490.95	3	4470.84	4470.83	0	2.1	223	Specific	678.35	667.44	250.16	10.5	196	>sp|P07911|UROM_HUMAN Uromodulin OS=Homo sapiens OX=9606 GN=UMOD PE=1 SV=1	1	20230315_zy_umod_t-before.13349.13349.3	controllerType=0 controllerNumber=1 scan=13349	49.8377
R.C[+57.021]NTAAPM[+15.995]WLN[+1954.704]GTHPSSDEGIVSR.K	HexNAc(5)Hex(4)NeuAc(1)	C[+57], M[+16], N[+1955]	1118.46	4	4470.84	4470.83	0	0.7	223	Specific	730.08	681.19	353.35	11.47	196	>sp|P07911|UROM_HUMAN Uromodulin OS=Homo sapiens OX=9606 GN=UMOD PE=1 SV=1	1	20230315_zy_umod_t-before.13216.13216.4	controllerType=0 controllerNumber=1 scan=13216	49.3373
R.C[+57.021]NTAAPMWLN[+1954.704]GTHPSSDEGIVSR.K	HexNAc(5)Hex(4)NeuAc(1)	C[+57], N[+1955]	1114.47	4	4454.84	4454.84	0	0.4	223	Specific	800.94	800.94	435.86	13.47	196	>sp|P07911|UROM_HUMAN Uromodulin OS=Homo sapiens OX=9606 GN=UMOD PE=1 SV=1	1	20230315_zy_umod_t-before.15263.15263.4	controllerType=0 controllerNumber=1 scan=15263	56.9287
R.C[+57.021]NTAAPMWLN[+1954.704]GTHPSSDEGIVSR.K	HexNAc(5)Hex(4)NeuAc(1)	C[+57], N[+1955]	1485.62	3	4454.84	4454.84	0	0.9	223	Specific	845.54	845.54	347.14	13.37	196	>sp|P07911|UROM_HUMAN Uromodulin OS=Homo sapiens OX=9606 GN=UMOD PE=1 SV=1	1	20230315_zy_umod_t-before.15262.15262.3	controllerType=0 controllerNumber=1 scan=15262	56.9269
R.C[+57.021]NTAAPM[+15.995]WLN[+2245.799]GTHPSSDEGIVSR.K	HexNAc(5)Hex(4)NeuAc(2)	C[+57], M[+16], N[+2246]	1587.98	3	4761.93	4761.93	0	0.2	223	Specific	245.85	245.85	19.85	5.41	196	>sp|P07911|UROM_HUMAN Uromodulin OS=Homo sapiens OX=9606 GN=UMOD PE=1 SV=1	1	20230315_zy_umod_t-before.11743.11743.3	controllerType=0 controllerNumber=1 scan=11743	43.8605
R.C[+57.021]NTAAPMWLN[+2245.799]GTHPSSDEGIVSR.K	HexNAc(5)Hex(4)NeuAc(2)	C[+57], N[+2246]	1582.31	3	4744.9	4745.93	-1	-5.7	223	Specific	291.88	291.88	291.88	5.53	196	>sp|P07911|UROM_HUMAN Uromodulin OS=Homo sapiens OX=9606 GN=UMOD PE=1 SV=1	1	20230315_zy_umod_t-before.18451.18451.3	controllerType=0 controllerNumber=1 scan=18451	68.2064
R.C[+57.021]NTAAPM[+15.995]WLN[+2245.799]GTHPSSDEGIVSR.K	HexNAc(5)Hex(4)NeuAc(2)	C[+57], M[+16], N[+2246]	1191.24	4	4761.92	4761.93	0	-1.3	223	Specific	328.28	328.28	139.57	4.39	196	>sp|P07911|UROM_HUMAN Uromodulin OS=Homo sapiens OX=9606 GN=UMOD PE=1 SV=1	1	20230315_zy_umod_t-before.14878.14878.4	controllerType=0 controllerNumber=1 scan=14878	55.5435
R.C[+57.021]NTAAPM[+15.995]WLN[+2245.799]GTHPSSDEGIVSR.K	HexNAc(5)Hex(4)NeuAc(2)	C[+57], M[+16], N[+2246]	1191.24	4	4761.93	4761.93	0	0.9	223	Specific	348.59	348.59	5.95	5.16	196	>sp|P07911|UROM_HUMAN Uromodulin OS=Homo sapiens OX=9606 GN=UMOD PE=1 SV=1	1	20230315_zy_umod_t-before.11769.11769.4	controllerType=0 controllerNumber=1 scan=11769	43.958
R.C[+57.021]NTAAPM[+15.995]WLN[+2245.799]GTHPSSDEGIVSR.K	HexNAc(5)Hex(4)NeuAc(2)	C[+57], M[+16], N[+2246]	1587.98	3	4761.94	4761.93	0	2.1	223	Specific	377.63	377.63	134.28	6.98	196	>sp|P07911|UROM_HUMAN Uromodulin OS=Homo sapiens OX=9606 GN=UMOD PE=1 SV=1	1	20230315_zy_umod_t-before.14760.14760.3	controllerType=0 controllerNumber=1 scan=14760	55.1104
R.C[+57.021]NTAAPM[+15.995]WLN[+2245.799]GTHPSSDEGIVSR.K	HexNAc(5)Hex(4)NeuAc(2)	C[+57], M[+16], N[+2246]	1190.98	4	4760.91	4761.93	-1	-3.4	223	Specific	379.54	379.54	379.54	6.95	196	>sp|P07911|UROM_HUMAN Uromodulin OS=Homo sapiens OX=9606 GN=UMOD PE=1 SV=1	1	20230315_zy_umod_t-before.14914.14914.4	controllerType=0 controllerNumber=1 scan=14914	55.6782
R.C[+57.021]NTAAPMWLN[+2245.799]GTHPSSDEGIVSR.K	HexNAc(5)Hex(4)NeuAc(2)	C[+57], N[+2246]	1186.98	4	4744.91	4745.93	-1	-5.1	223	Specific	385.52	385.52	385.52	6.95	196	>sp|P07911|UROM_HUMAN Uromodulin OS=Homo sapiens OX=9606 GN=UMOD PE=1 SV=1	1	20230315_zy_umod_t-before.18479.18479.4	controllerType=0 controllerNumber=1 scan=18479	68.3082
R.C[+57.021]NTAAPM[+15.995]WLN[+2245.799]GTHPSSDEGIVSR.K	HexNAc(5)Hex(4)NeuAc(2)	C[+57], M[+16], N[+2246]	1588.32	3	4762.93	4761.93	1	0.6	223	Specific	395.95	395.95	74.98	7.39	196	>sp|P07911|UROM_HUMAN Uromodulin OS=Homo sapiens OX=9606 GN=UMOD PE=1 SV=1	1	20230315_zy_umod_t-before.15116.15116.3	controllerType=0 controllerNumber=1 scan=15116	56.4111
R.C[+57.021]NTAAPMWLN[+2245.799]GTHPSSDEGIVSR.K	HexNAc(5)Hex(4)NeuAc(2)	C[+57], N[+2246]	1582.31	3	4744.91	4745.93	-1	-4.8	223	Specific	440.21	440.21	440.21	7.64	196	>sp|P07911|UROM_HUMAN Uromodulin OS=Homo sapiens OX=9606 GN=UMOD PE=1 SV=1	1	20230315_zy_umod_t-before.18477.18477.3	controllerType=0 controllerNumber=1 scan=18477	68.3027
R.C[+57.021]NTAAPM[+15.995]WLN[+2245.799]GTHPSSDEGIVSR.K	HexNAc(5)Hex(4)NeuAc(2)	C[+57], M[+16], N[+2246]	1191.23	4	4761.9	4761.93	0	-5.4	223	Specific	533.34	533.34	533.34	7.45	196	>sp|P07911|UROM_HUMAN Uromodulin OS=Homo sapiens OX=9606 GN=UMOD PE=1 SV=1	1	20230315_zy_umod_t-before.15107.15107.4	controllerType=0 controllerNumber=1 scan=15107	56.3747
R.C[+57.021]NTAAPMWLN[+2245.799]GTHPSSDEGIVSR.K	HexNAc(5)Hex(4)NeuAc(2)	C[+57], N[+2246]	1582.98	3	4746.92	4745.93	1	-3.4	223	Specific	583.97	583.97	583.97	8.91	196	>sp|P07911|UROM_HUMAN Uromodulin OS=Homo sapiens OX=9606 GN=UMOD PE=1 SV=1	1	20230315_zy_umod_t-before.17398.17398.3	controllerType=0 controllerNumber=1 scan=17398	64.4752
R.C[+57.021]NTAAPMWLN[+2245.799]GTHPSSDEGIVSR.K	HexNAc(5)Hex(4)NeuAc(2)	C[+57], N[+2246]	1582.65	3	4745.92	4745.93	0	-2.1	223	Specific	606.49	606.49	606.49	9.91	196	>sp|P07911|UROM_HUMAN Uromodulin OS=Homo sapiens OX=9606 GN=UMOD PE=1 SV=1	1	20230315_zy_umod_t-before.17315.17315.3	controllerType=0 controllerNumber=1 scan=17315	64.1991
R.C[+57.021]NTAAPMWLN[+2245.799]GTHPSSDEGIVSR.K	HexNAc(5)Hex(4)NeuAc(2)	C[+57], N[+2246]	1582.65	3	4745.94	4745.93	0	0.6	223	Specific	634.96	634.96	634.96	9.91	196	>sp|P07911|UROM_HUMAN Uromodulin OS=Homo sapiens OX=9606 GN=UMOD PE=1 SV=1	1	20230315_zy_umod_t-before.17157.17157.3	controllerType=0 controllerNumber=1 scan=17157	63.6608
R.C[+57.021]NTAAPM[+15.995]WLN[+2245.799]GTHPSSDEGIVSR.K	HexNAc(5)Hex(4)NeuAc(2)	C[+57], M[+16], N[+2246]	1587.99	3	4761.94	4761.93	0	2.7	223	Specific	648.19	648.19	120.42	9.2	196	>sp|P07911|UROM_HUMAN Uromodulin OS=Homo sapiens OX=9606 GN=UMOD PE=1 SV=1	1	20230315_zy_umod_t-before.14970.14970.3	controllerType=0 controllerNumber=1 scan=14970	55.8822
R.C[+57.021]NTAAPM[+15.995]WLN[+2245.799]GTHPSSDEGIVSR.K	HexNAc(5)Hex(4)NeuAc(2)	C[+57], M[+16], N[+2246]	1191.24	4	4761.93	4761.93	0	0.2	223	Specific	670.91	670.91	252.7	10.47	196	>sp|P07911|UROM_HUMAN Uromodulin OS=Homo sapiens OX=9606 GN=UMOD PE=1 SV=1	1	20230315_zy_umod_t-before.15056.15056.4	controllerType=0 controllerNumber=1 scan=15056	56.193
R.C[+57.021]NTAAPM[+15.995]WLN[+2245.799]GTHPSSDEGIVSR.K	HexNAc(5)Hex(4)NeuAc(2)	C[+57], M[+16], N[+2246]	1191.24	4	4761.93	4761.93	0	0	223	Specific	694.73	694.73	278.27	10.47	196	>sp|P07911|UROM_HUMAN Uromodulin OS=Homo sapiens OX=9606 GN=UMOD PE=1 SV=1	1	20230315_zy_umod_t-before.14969.14969.4	controllerType=0 controllerNumber=1 scan=14969	55.8799
R.C[+57.021]NTAAPMWLN[+2245.799]GTHPSSDEGIVSR.K	HexNAc(5)Hex(4)NeuAc(2)	C[+57], N[+2246]	1187.24	4	4745.94	4745.93	0	2.4	223	Specific	711.19	711.19	711.19	11.06	196	>sp|P07911|UROM_HUMAN Uromodulin OS=Homo sapiens OX=9606 GN=UMOD PE=1 SV=1	1	20230315_zy_umod_t-before.17136.17136.4	controllerType=0 controllerNumber=1 scan=17136	63.5794
R.C[+57.021]NTAAPM[+15.995]WLN[+2245.799]GTHPSSDEGIVSR.K	HexNAc(5)Hex(4)NeuAc(2)	C[+57], M[+16], N[+2246]	1587.98	3	4761.94	4761.93	0	1.5	223	Specific	714.68	714.68	177.72	11.54	196	>sp|P07911|UROM_HUMAN Uromodulin OS=Homo sapiens OX=9606 GN=UMOD PE=1 SV=1	1	20230315_zy_umod_t-before.15057.15057.3	controllerType=0 controllerNumber=1 scan=15057	56.1953
R.C[+57.021]NTAAPMWLN[+2245.799]GTHPSSDEGIVSR.K	HexNAc(5)Hex(4)NeuAc(2)	C[+57], N[+2246]	1582.32	3	4744.94	4745.93	-1	1.8	223	Specific	722.56	722.56	722.56	11.54	196	>sp|P07911|UROM_HUMAN Uromodulin OS=Homo sapiens OX=9606 GN=UMOD PE=1 SV=1	1	20230315_zy_umod_t-before.17345.17345.3	controllerType=0 controllerNumber=1 scan=17345	64.3001
R.C[+57.021]NTAAPMWLN[+2245.799]GTHPSSDEGIVSR.K	HexNAc(5)Hex(4)NeuAc(2)	C[+57], N[+2246]	1582.65	3	4745.93	4745.93	0	-0.6	223	Specific	728.08	728.08	728.08	11.91	196	>sp|P07911|UROM_HUMAN Uromodulin OS=Homo sapiens OX=9606 GN=UMOD PE=1 SV=1	1	20230315_zy_umod_t-before.17306.17306.3	controllerType=0 controllerNumber=1 scan=17306	64.1795
R.C[+57.021]NTAAPMWLN[+2245.799]GTHPSSDEGIVSR.K	HexNAc(5)Hex(4)NeuAc(2)	C[+57], N[+2246]	1187.24	4	4745.94	4745.93	0	0.9	223	Specific	763.39	763.39	763.39	11.93	196	>sp|P07911|UROM_HUMAN Uromodulin OS=Homo sapiens OX=9606 GN=UMOD PE=1 SV=1	1	20230315_zy_umod_t-before.17131.17131.4	controllerType=0 controllerNumber=1 scan=17131	63.5617
R.C[+57.021]NTAAPM[+15.995]WLN[+2245.799]GTHPSSDEGIVSR.K	HexNAc(5)Hex(4)NeuAc(2)	C[+57], M[+16], N[+2246]	1191.24	4	4761.94	4761.93	0	1.5	223	Specific	786.71	786.71	200.22	12.11	196	>sp|P07911|UROM_HUMAN Uromodulin OS=Homo sapiens OX=9606 GN=UMOD PE=1 SV=1	1	20230315_zy_umod_t-before.15063.15063.4	controllerType=0 controllerNumber=1 scan=15063	56.2102
R.C[+57.021]NTAAPM[+15.995]WLN[+2245.799]GTHPSSDEGIVSR.K	HexNAc(5)Hex(4)NeuAc(2)	C[+57], M[+16], N[+2246]	1191.24	4	4761.93	4761.93	0	0.5	223	Specific	789.63	789.63	178.18	12.47	196	>sp|P07911|UROM_HUMAN Uromodulin OS=Homo sapiens OX=9606 GN=UMOD PE=1 SV=1	1	20230315_zy_umod_t-before.14977.14977.4	controllerType=0 controllerNumber=1 scan=14977	55.902
R.C[+57.021]NTAAPMWLN[+2245.799]GTHPSSDEGIVSR.K	HexNAc(5)Hex(4)NeuAc(2)	C[+57], N[+2246]	1187.24	4	4745.94	4745.93	0	0.5	223	Specific	796.23	796.23	796.23	12.47	196	>sp|P07911|UROM_HUMAN Uromodulin OS=Homo sapiens OX=9606 GN=UMOD PE=1 SV=1	1	20230315_zy_umod_t-before.17310.17310.2	controllerType=0 controllerNumber=1 scan=17310	64.188
R.C[+57.021]NTAAPMWLN[+2245.799]GTHPSSDEGIVSR.K	HexNAc(5)Hex(4)NeuAc(2)	C[+57], N[+2246]	1187.24	4	4745.94	4745.93	0	0.6	223	Specific	798.36	798.36	798.36	12.47	196	>sp|P07911|UROM_HUMAN Uromodulin OS=Homo sapiens OX=9606 GN=UMOD PE=1 SV=1	1	20230315_zy_umod_t-before.17322.17322.4	controllerType=0 controllerNumber=1 scan=17322	64.2302
R.C[+57.021]NTAAPMWLN[+2245.799]GTHPSSDEGIVSR.K	HexNAc(5)Hex(4)NeuAc(2)	C[+57], N[+2246]	1187.24	4	4745.93	4745.93	0	-0.6	223	Specific	799.65	799.65	799.65	12.47	196	>sp|P07911|UROM_HUMAN Uromodulin OS=Homo sapiens OX=9606 GN=UMOD PE=1 SV=1	1	20230315_zy_umod_t-before.17346.17346.4	controllerType=0 controllerNumber=1 scan=17346	64.3024
R.C[+57.021]NTAAPMWLN[+2245.799]GTHPSSDEGIVSR.K	HexNAc(5)Hex(4)NeuAc(2)	C[+57], N[+2246]	1187.24	4	4745.93	4745.93	0	-0.4	223	Specific	869.6	869.6	869.6	14.47	196	>sp|P07911|UROM_HUMAN Uromodulin OS=Homo sapiens OX=9606 GN=UMOD PE=1 SV=1	1	20230315_zy_umod_t-before.17376.17376.4	controllerType=0 controllerNumber=1 scan=17376	64.3954
R.C[+57.021]NTAAPM[+15.995]WLN[+1971.719]GTHPSSDEGIVSR.K	HexNAc(5)Hex(5)Fuc(1)	C[+57], M[+16], N[+1972]	1496.28	3	4486.83	4487.85	-1	-3.2	223	Specific	240.19	233.27	46.1	5.41	196	>sp|P07911|UROM_HUMAN Uromodulin OS=Homo sapiens OX=9606 GN=UMOD PE=1 SV=1	1	20230315_zy_umod_t-before.12506.12506.3	controllerType=0 controllerNumber=1 scan=12506	46.617
R.C[+57.021]NTAAPM[+15.995]WLN[+1971.719]GTHPSSDEGIVSR.K	HexNAc(5)Hex(5)Fuc(1)	C[+57], M[+16], N[+1972]	1496.29	3	4486.84	4487.85	-1	-0.7	223	Specific	323.32	323.32	11.89	5.99	196	>sp|P07911|UROM_HUMAN Uromodulin OS=Homo sapiens OX=9606 GN=UMOD PE=1 SV=1	1	20230315_zy_umod_t-before.12386.12386.3	controllerType=0 controllerNumber=1 scan=12386	46.1587
R.C[+57.021]NTAAPMWLN[+2262.814]GTHPSSDEGIVSR.K	HexNAc(5)Hex(5)Fuc(1)NeuAc(1)	C[+57], N[+2263]	1587.98	3	4761.92	4762.95	-1	-4.8	223	Specific	330.34	330.34	101.48	5.99	196	>sp|P07911|UROM_HUMAN Uromodulin OS=Homo sapiens OX=9606 GN=UMOD PE=1 SV=1	1	20230315_zy_umod_t-before.18493.18493.3	controllerType=0 controllerNumber=1 scan=18493	68.3587
R.C[+57.021]NTAAPMWLN[+2262.814]GTHPSSDEGIVSR.K	HexNAc(5)Hex(5)Fuc(1)NeuAc(1)	C[+57], N[+2263]	1191.24	4	4761.94	4762.95	-1	-1.9	223	Specific	381.45	381.45	34.31	5.79	196	>sp|P07911|UROM_HUMAN Uromodulin OS=Homo sapiens OX=9606 GN=UMOD PE=1 SV=1	1	20230315_zy_umod_t-before.11707.11707.4	controllerType=0 controllerNumber=1 scan=11707	43.7193
R.C[+57.021]NTAAPM[+15.995]WLN[+2262.814]GTHPSSDEGIVSR.K	HexNAc(5)Hex(5)Fuc(1)NeuAc(1)	C[+57], M[+16], N[+2263]	1195.24	4	4777.93	4778.94	-1	-2.8	223	Specific	457.61	457.61	23.74	7.2	196	>sp|P07911|UROM_HUMAN Uromodulin OS=Homo sapiens OX=9606 GN=UMOD PE=1 SV=1	1	20230315_zy_umod_t-before.14071.14071.4	controllerType=0 controllerNumber=1 scan=14071	52.5806
R.C[+57.021]NTAAPM[+15.995]WLN[+2262.814]GTHPSSDEGIVSR.K	HexNAc(5)Hex(5)Fuc(1)NeuAc(1)	C[+57], M[+16], N[+2263]	1593.32	3	4777.93	4778.94	-1	-1.7	223	Specific	461.36	461.36	10.86	7.64	196	>sp|P07911|UROM_HUMAN Uromodulin OS=Homo sapiens OX=9606 GN=UMOD PE=1 SV=1	1	20230315_zy_umod_t-before.14072.14072.3	controllerType=0 controllerNumber=1 scan=14072	52.5829
R.C[+57.021]NTAAPMWLN[+2262.814]GTHPSSDEGIVSR.K	HexNAc(5)Hex(5)Fuc(1)NeuAc(1)	C[+57], N[+2263]	1191.24	4	4761.93	4762.95	-1	-2.2	223	Specific	479.52	479.52	53.81	6.04	196	>sp|P07911|UROM_HUMAN Uromodulin OS=Homo sapiens OX=9606 GN=UMOD PE=1 SV=1	1	20230315_zy_umod_t-before.11762.11762.4	controllerType=0 controllerNumber=1 scan=11762	43.925
R.C[+57.021]NTAAPMWLN[+2262.814]GTHPSSDEGIVSR.K	HexNAc(5)Hex(5)Fuc(1)NeuAc(1)	C[+57], N[+2263]	1191.24	4	4761.93	4762.95	-1	-2.3	223	Specific	530.77	530.77	83.46	7.45	196	>sp|P07911|UROM_HUMAN Uromodulin OS=Homo sapiens OX=9606 GN=UMOD PE=1 SV=1	1	20230315_zy_umod_t-before.11788.11788.4	controllerType=0 controllerNumber=1 scan=11788	44.0236
R.C[+57.021]NTAAPMWLN[+2553.910]GTHPSSDEGIVSR.K	HexNAc(5)Hex(5)Fuc(1)NeuAc(2)	C[+57], N[+2554]	1685.36	3	5054.06	5054.04	0	2.7	223	Specific	203.71	203.71	203.71	4.44	196	>sp|P07911|UROM_HUMAN Uromodulin OS=Homo sapiens OX=9606 GN=UMOD PE=1 SV=1	1	20230315_zy_umod_t-before.17039.17039.3	controllerType=0 controllerNumber=1 scan=17039	63.2111
R.C[+57.021]NTAAPMWLN[+2553.910]GTHPSSDEGIVSR.K	HexNAc(5)Hex(5)Fuc(1)NeuAc(2)	C[+57], N[+2554]	1264.27	4	5054.05	5054.04	0	1.4	223	Specific	782.17	782.17	782.17	11.93	196	>sp|P07911|UROM_HUMAN Uromodulin OS=Homo sapiens OX=9606 GN=UMOD PE=1 SV=1	1	20230315_zy_umod_t-before.17035.17035.4	controllerType=0 controllerNumber=1 scan=17035	63.2015
R.C[+57.021]NTAAPMWLN[+2116.756]GTHPSSDEGIVSR.K	HexNAc(5)Hex(5)NeuAc(1)	C[+57], N[+2117]	1154.98	4	4616.9	4616.89	0	1.6	223	Specific	274.37	274.37	31.64	3.55	196	>sp|P07911|UROM_HUMAN Uromodulin OS=Homo sapiens OX=9606 GN=UMOD PE=1 SV=1	1	20230315_zy_umod_t-before.9778.9778.2	controllerType=0 controllerNumber=1 scan=9778	36.271
R.C[+57.021]NTAAPM[+15.995]WLN[+2116.756]GTHPSSDEGIVSR.K	HexNAc(5)Hex(5)NeuAc(1)	C[+57], M[+16], N[+2117]	1544.63	3	4631.86	4632.89	-1	-4.1	223	Specific	276.46	276.46	276.46	5.51	196	>sp|P07911|UROM_HUMAN Uromodulin OS=Homo sapiens OX=9606 GN=UMOD PE=1 SV=1	1	20230315_zy_umod_t-before.12435.12435.3	controllerType=0 controllerNumber=1 scan=12435	46.3529
R.C[+57.021]NTAAPMWLN[+2116.756]GTHPSSDEGIVSR.K	HexNAc(5)Hex(5)NeuAc(1)	C[+57], N[+2117]	1155.23	4	4617.9	4616.89	1	0.6	223	Specific	306.75	306.75	64.15	3.93	196	>sp|P07911|UROM_HUMAN Uromodulin OS=Homo sapiens OX=9606 GN=UMOD PE=1 SV=1	1	20230315_zy_umod_t-before.9796.9796.4	controllerType=0 controllerNumber=1 scan=9796	36.3375
R.C[+57.021]NTAAPMWLN[+2116.756]GTHPSSDEGIVSR.K	HexNAc(5)Hex(5)NeuAc(1)	C[+57], N[+2117]	1154.98	4	4616.89	4616.89	0	0.4	223	Specific	337.59	337.59	26.44	3.79	196	>sp|P07911|UROM_HUMAN Uromodulin OS=Homo sapiens OX=9606 GN=UMOD PE=1 SV=1	1	20230315_zy_umod_t-before.9802.9802.4	controllerType=0 controllerNumber=1 scan=9802	36.363
R.C[+57.021]NTAAPM[+15.995]WLN[+2116.756]GTHPSSDEGIVSR.K	HexNAc(5)Hex(5)NeuAc(1)	C[+57], M[+16], N[+2117]	1158.72	4	4631.88	4632.89	-1	-0.9	223	Specific	365.31	365.31	365.31	5.67	196	>sp|P07911|UROM_HUMAN Uromodulin OS=Homo sapiens OX=9606 GN=UMOD PE=1 SV=1	1	20230315_zy_umod_t-before.12463.12463.4	controllerType=0 controllerNumber=1 scan=12463	46.4573
R.C[+57.021]NTAAPMWLN[+2407.852]GTHPSSDEGIVSR.K	HexNAc(5)Hex(5)NeuAc(2)	C[+57], N[+2408]	1637	3	4908.98	4907.99	1	-1	223	Specific	274.07	274.07	178.3	5.51	196	>sp|P07911|UROM_HUMAN Uromodulin OS=Homo sapiens OX=9606 GN=UMOD PE=1 SV=1	1	20230315_zy_umod_t-before.17615.17615.3	controllerType=0 controllerNumber=1 scan=17615	65.2678
R.C[+57.021]NTAAPMWLN[+2407.852]GTHPSSDEGIVSR.K	HexNAc(5)Hex(5)NeuAc(2)	C[+57], N[+2408]	1636.67	3	4908	4907.99	0	3.7	223	Specific	303.05	303.05	33.11	4.47	196	>sp|P07911|UROM_HUMAN Uromodulin OS=Homo sapiens OX=9606 GN=UMOD PE=1 SV=1	1	20230315_zy_umod_t-before.11337.11337.3	controllerType=0 controllerNumber=1 scan=11337	42.2861
R.C[+57.021]NTAAPMWLN[+2407.852]GTHPSSDEGIVSR.K	HexNAc(5)Hex(5)NeuAc(2)	C[+57], N[+2408]	1227.75	4	4907.99	4907.99	0	1	223	Specific	328.79	328.79	26.96	3.25	196	>sp|P07911|UROM_HUMAN Uromodulin OS=Homo sapiens OX=9606 GN=UMOD PE=1 SV=1	1	20230315_zy_umod_t-before.11335.11335.4	controllerType=0 controllerNumber=1 scan=11335	42.2812
R.C[+57.021]NTAAPMWLN[+2407.852]GTHPSSDEGIVSR.K	HexNAc(5)Hex(5)NeuAc(2)	C[+57], N[+2408]	1227.75	4	4907.99	4907.99	0	1.2	223	Specific	333.89	333.89	25.98	5.02	196	>sp|P07911|UROM_HUMAN Uromodulin OS=Homo sapiens OX=9606 GN=UMOD PE=1 SV=1	1	20230315_zy_umod_t-before.11453.11453.4	controllerType=0 controllerNumber=1 scan=11453	42.7382
R.C[+57.021]NTAAPMWLN[+2133.772]GTHPSSDEGIVSR.K	HexNAc(5)Hex(6)Fuc(1)	C[+57], N[+2134]	1158.98	4	4632.88	4633.91	-1	-5	223	Specific	241.05	241.05	36.48	3.21	196	>sp|P07911|UROM_HUMAN Uromodulin OS=Homo sapiens OX=9606 GN=UMOD PE=1 SV=1	1	20230315_zy_umod_t-before.12457.12457.4	controllerType=0 controllerNumber=1 scan=12457	46.4394
R.C[+57.021]NTAAPM[+15.995]WLN[+2424.867]GTHPSSDEGIVSR.K	HexNAc(5)Hex(6)Fuc(1)NeuAc(1)	C[+57], M[+16], N[+2425]	1236.26	4	4942.01	4941	1	2.2	223	Specific	364.23	364.23	364.23	5.26	196	>sp|P07911|UROM_HUMAN Uromodulin OS=Homo sapiens OX=9606 GN=UMOD PE=1 SV=1	1	20230315_zy_umod_t-before.12744.12744.4	controllerType=0 controllerNumber=1 scan=12744	47.5331
R.C[+57.021]NTAAPMWLN[+2424.867]GTHPSSDEGIVSR.K	HexNAc(5)Hex(6)Fuc(1)NeuAc(1)	C[+57], N[+2425]	1232.26	4	4926.01	4925	1	1.5	223	Specific	387.91	387.91	387.91	6.59	196	>sp|P07911|UROM_HUMAN Uromodulin OS=Homo sapiens OX=9606 GN=UMOD PE=1 SV=1	1	20230315_zy_umod_t-before.14809.14809.4	controllerType=0 controllerNumber=1 scan=14809	55.2938
R.C[+57.021]NTAAPM[+15.995]WLN[+2424.867]GTHPSSDEGIVSR.K	HexNAc(5)Hex(6)Fuc(1)NeuAc(1)	C[+57], M[+16], N[+2425]	1235.75	4	4939.99	4941	-1	-0.7	223	Specific	431.58	431.58	431.58	7.04	196	>sp|P07911|UROM_HUMAN Uromodulin OS=Homo sapiens OX=9606 GN=UMOD PE=1 SV=1	1	20230315_zy_umod_t-before.12729.12729.4	controllerType=0 controllerNumber=1 scan=12729	47.4747
R.C[+57.021]NTAAPM[+15.995]WLN[+2715.963]GTHPSSDEGIVSR.K	HexNAc(5)Hex(6)Fuc(1)NeuAc(2)	C[+57], M[+16], N[+2716]	1309.03	4	5233.1	5232.09	1	1.2	223	Specific	272.62	272.62	43.11	4.53	196	>sp|P07911|UROM_HUMAN Uromodulin OS=Homo sapiens OX=9606 GN=UMOD PE=1 SV=1	1	20230315_zy_umod_t-before.14349.14349.4	controllerType=0 controllerNumber=1 scan=14349	53.6329
R.C[+57.021]NTAAPM[+15.995]WLN[+2715.963]GTHPSSDEGIVSR.K	HexNAc(5)Hex(6)Fuc(1)NeuAc(2)	C[+57], M[+16], N[+2716]	1308.78	4	5232.11	5232.09	0	3.4	223	Specific	348.91	348.91	348.91	4.64	196	>sp|P07911|UROM_HUMAN Uromodulin OS=Homo sapiens OX=9606 GN=UMOD PE=1 SV=1	1	20230315_zy_umod_t-before.14227.14227.4	controllerType=0 controllerNumber=1 scan=14227	53.1766
R.C[+57.021]NTAAPM[+15.995]WLN[+2715.963]GTHPSSDEGIVSR.K	HexNAc(5)Hex(6)Fuc(1)NeuAc(2)	C[+57], M[+16], N[+2716]	1308.78	4	5232.11	5232.09	0	3	223	Specific	487.34	487.34	487.34	6.51	196	>sp|P07911|UROM_HUMAN Uromodulin OS=Homo sapiens OX=9606 GN=UMOD PE=1 SV=1	1	20230315_zy_umod_t-before.14251.14251.4	controllerType=0 controllerNumber=1 scan=14251	53.2618
R.C[+57.021]NTAAPM[+15.995]WLN[+2715.963]GTHPSSDEGIVSR.K	HexNAc(5)Hex(6)Fuc(1)NeuAc(2)	C[+57], M[+16], N[+2716]	1308.78	4	5232.09	5232.09	0	-0.2	223	Specific	575.88	575.88	575.88	8.47	196	>sp|P07911|UROM_HUMAN Uromodulin OS=Homo sapiens OX=9606 GN=UMOD PE=1 SV=1	1	20230315_zy_umod_t-before.14147.14147.4	controllerType=0 controllerNumber=1 scan=14147	52.8663
R.C[+57.021]NTAAPM[+15.995]WLN[+2715.963]GTHPSSDEGIVSR.K	HexNAc(5)Hex(6)Fuc(1)NeuAc(2)	C[+57], M[+16], N[+2716]	1308.78	4	5232.11	5232.09	0	3.1	223	Specific	611.38	584.65	584.65	8.76	196	>sp|P07911|UROM_HUMAN Uromodulin OS=Homo sapiens OX=9606 GN=UMOD PE=1 SV=1	1	20230315_zy_umod_t-before.14246.14246.4	controllerType=0 controllerNumber=1 scan=14246	53.2486
R.C[+57.021]NTAAPMWLN[+2715.963]GTHPSSDEGIVSR.K	HexNAc(5)Hex(6)Fuc(1)NeuAc(2)	C[+57], N[+2716]	1304.78	4	5216.09	5216.1	0	-2.3	223	Specific	612.74	612.74	612.74	9.47	196	>sp|P07911|UROM_HUMAN Uromodulin OS=Homo sapiens OX=9606 GN=UMOD PE=1 SV=1	1	20230315_zy_umod_t-before.16594.16594.4	controllerType=0 controllerNumber=1 scan=16594	61.6185
R.C[+57.021]NTAAPMWLN[+2715.963]GTHPSSDEGIVSR.K	HexNAc(5)Hex(6)Fuc(1)NeuAc(2)	C[+57], N[+2716]	1304.78	4	5216.09	5216.1	0	-1.7	223	Specific	760.84	760.84	760.84	12.47	196	>sp|P07911|UROM_HUMAN Uromodulin OS=Homo sapiens OX=9606 GN=UMOD PE=1 SV=1	1	20230315_zy_umod_t-before.16599.16599.4	controllerType=0 controllerNumber=1 scan=16599	61.6367
R.C[+57.021]NTAAPMWLN[+3007.058]GTHPSSDEGIVSR.K	HexNAc(5)Hex(6)Fuc(1)NeuAc(3)	C[+57], N[+3007]	1836.41	3	5507.21	5507.19	0	3.8	223	Specific	280.96	280.96	280.96	4.22	196	>sp|P07911|UROM_HUMAN Uromodulin OS=Homo sapiens OX=9606 GN=UMOD PE=1 SV=1	1	20230315_zy_umod_t-before.18182.18182.3	controllerType=0 controllerNumber=1 scan=18182	67.2803
R.C[+57.021]NTAAPM[+15.995]WLN[+3007.058]GTHPSSDEGIVSR.K	HexNAc(5)Hex(6)Fuc(1)NeuAc(3)	C[+57], M[+16], N[+3007]	1841.74	3	5523.21	5523.19	0	3.3	223	Specific	320.77	320.77	320.77	4.93	196	>sp|P07911|UROM_HUMAN Uromodulin OS=Homo sapiens OX=9606 GN=UMOD PE=1 SV=1	1	20230315_zy_umod_t-before.15955.15955.3	controllerType=0 controllerNumber=1 scan=15955	59.2783
R.C[+57.021]NTAAPM[+15.995]WLN[+3007.058]GTHPSSDEGIVSR.K	HexNAc(5)Hex(6)Fuc(1)NeuAc(3)	C[+57], M[+16], N[+3007]	1381.3	4	5522.19	5523.19	-1	1.8	223	Specific	346.06	346.06	346.06	5.34	196	>sp|P07911|UROM_HUMAN Uromodulin OS=Homo sapiens OX=9606 GN=UMOD PE=1 SV=1	1	20230315_zy_umod_t-before.15889.15889.4	controllerType=0 controllerNumber=1 scan=15889	59.0369
R.C[+57.021]NTAAPMWLN[+3007.058]GTHPSSDEGIVSR.K	HexNAc(5)Hex(6)Fuc(1)NeuAc(3)	C[+57], N[+3007]	1377.55	4	5507.19	5507.19	0	0.1	223	Specific	639.58	639.58	639.58	9.47	196	>sp|P07911|UROM_HUMAN Uromodulin OS=Homo sapiens OX=9606 GN=UMOD PE=1 SV=1	1	20230315_zy_umod_t-before.18178.18178.4	controllerType=0 controllerNumber=1 scan=18178	67.2706
R.C[+57.021]NTAAPM[+15.995]WLN[+3007.058]GTHPSSDEGIVSR.K	HexNAc(5)Hex(6)Fuc(1)NeuAc(3)	C[+57], M[+16], N[+3007]	1381.55	4	5523.19	5523.19	0	1	223	Specific	655.56	655.56	655.56	9.93	196	>sp|P07911|UROM_HUMAN Uromodulin OS=Homo sapiens OX=9606 GN=UMOD PE=1 SV=1	1	20230315_zy_umod_t-before.15973.15973.4	controllerType=0 controllerNumber=1 scan=15973	59.3404
R.C[+57.021]NTAAPM[+15.995]WLN[+3007.058]GTHPSSDEGIVSR.K	HexNAc(5)Hex(6)Fuc(1)NeuAc(3)	C[+57], M[+16], N[+3007]	1381.3	4	5522.19	5523.19	-1	0.7	223	Specific	696.43	696.43	696.43	10.47	196	>sp|P07911|UROM_HUMAN Uromodulin OS=Homo sapiens OX=9606 GN=UMOD PE=1 SV=1	1	20230315_zy_umod_t-before.15939.15939.4	controllerType=0 controllerNumber=1 scan=15939	59.2236
R.C[+57.021]NTAAPM[+15.995]WLN[+3007.058]GTHPSSDEGIVSR.K	HexNAc(5)Hex(6)Fuc(1)NeuAc(3)	C[+57], M[+16], N[+3007]	1381.55	4	5523.2	5523.19	0	1.8	223	Specific	701.25	701.25	701.25	11.11	196	>sp|P07911|UROM_HUMAN Uromodulin OS=Homo sapiens OX=9606 GN=UMOD PE=1 SV=1	1	20230315_zy_umod_t-before.15826.15826.2	controllerType=0 controllerNumber=1 scan=15826	58.8235
R.C[+57.021]NTAAPM[+15.995]WLN[+3007.058]GTHPSSDEGIVSR.K	HexNAc(5)Hex(6)Fuc(1)NeuAc(3)	C[+57], M[+16], N[+3007]	1381.56	4	5523.2	5523.19	0	2.8	223	Specific	744.17	744.17	744.17	10.76	196	>sp|P07911|UROM_HUMAN Uromodulin OS=Homo sapiens OX=9606 GN=UMOD PE=1 SV=1	1	20230315_zy_umod_t-before.15838.15838.2	controllerType=0 controllerNumber=1 scan=15838	58.8663
R.C[+57.021]NTAAPMWLN[+3007.058]GTHPSSDEGIVSR.K	HexNAc(5)Hex(6)Fuc(1)NeuAc(3)	C[+57], N[+3007]	1377.56	4	5507.2	5507.19	0	1.1	223	Specific	791.39	791.39	791.39	11.93	196	>sp|P07911|UROM_HUMAN Uromodulin OS=Homo sapiens OX=9606 GN=UMOD PE=1 SV=1	1	20230315_zy_umod_t-before.18249.18249.4	controllerType=0 controllerNumber=1 scan=18249	67.5057
R.C[+57.021]NTAAPMWLN[+2278.809]GTHPSSDEGIVSR.K	HexNAc(5)Hex(6)NeuAc(1)	C[+57], N[+2279]	1593.32	3	4777.94	4778.94	-1	-0.8	223	Specific	217.1	217.1	131.1	5.15	196	>sp|P07911|UROM_HUMAN Uromodulin OS=Homo sapiens OX=9606 GN=UMOD PE=1 SV=1	1	20230315_zy_umod_t-before.15008.15008.3	controllerType=0 controllerNumber=1 scan=15008	56.0172
R.C[+57.021]NTAAPMWLN[+2278.809]GTHPSSDEGIVSR.K	HexNAc(5)Hex(6)NeuAc(1)	C[+57], N[+2279]	1593.32	3	4777.93	4778.94	-1	-1.2	223	Specific	241.93	241.93	17.74	5.41	196	>sp|P07911|UROM_HUMAN Uromodulin OS=Homo sapiens OX=9606 GN=UMOD PE=1 SV=1	1	20230315_zy_umod_t-before.14077.14077.3	controllerType=0 controllerNumber=1 scan=14077	52.5968
R.C[+57.021]NTAAPM[+15.995]WLN[+2278.809]GTHPSSDEGIVSR.K	HexNAc(5)Hex(6)NeuAc(1)	C[+57], M[+16], N[+2279]	1199.24	4	4793.93	4794.94	-1	-0.2	223	Specific	335.97	335.97	335.97	5.56	196	>sp|P07911|UROM_HUMAN Uromodulin OS=Homo sapiens OX=9606 GN=UMOD PE=1 SV=1	1	20230315_zy_umod_t-before.13097.13097.4	controllerType=0 controllerNumber=1 scan=13097	48.8816
R.C[+57.021]NTAAPMWLN[+2278.809]GTHPSSDEGIVSR.K	HexNAc(5)Hex(6)NeuAc(1)	C[+57], N[+2279]	1195.24	4	4777.92	4778.94	-1	-4.2	223	Specific	443.02	443.02	141.18	7.2	196	>sp|P07911|UROM_HUMAN Uromodulin OS=Homo sapiens OX=9606 GN=UMOD PE=1 SV=1	1	20230315_zy_umod_t-before.15021.15021.4	controllerType=0 controllerNumber=1 scan=15021	56.0678
R.C[+57.021]NTAAPMWLN[+2278.809]GTHPSSDEGIVSR.K	HexNAc(5)Hex(6)NeuAc(1)	C[+57], N[+2279]	1195.49	4	4778.95	4778.94	0	1.2	223	Specific	453.1	453.1	176.8	6.66	196	>sp|P07911|UROM_HUMAN Uromodulin OS=Homo sapiens OX=9606 GN=UMOD PE=1 SV=1	1	20230315_zy_umod_t-before.14959.14959.4	controllerType=0 controllerNumber=1 scan=14959	55.8386
R.C[+57.021]NTAAPMWLN[+2569.905]GTHPSSDEGIVSR.K	HexNAc(5)Hex(6)NeuAc(2)	C[+57], N[+2570]	1268.27	4	5070.05	5070.04	0	2.9	223	Specific	219.03	219.03	94.05	4.01	196	>sp|P07911|UROM_HUMAN Uromodulin OS=Homo sapiens OX=9606 GN=UMOD PE=1 SV=1	1	20230315_zy_umod_t-before.17180.17180.4	controllerType=0 controllerNumber=1 scan=17180	63.7485
R.C[+57.021]NTAAPMWLN[+2569.905]GTHPSSDEGIVSR.K	HexNAc(5)Hex(6)NeuAc(2)	C[+57], N[+2570]	1690.35	3	5069.05	5070.04	-1	2.7	223	Specific	261.87	261.87	176.79	4.8	196	>sp|P07911|UROM_HUMAN Uromodulin OS=Homo sapiens OX=9606 GN=UMOD PE=1 SV=1	1	20230315_zy_umod_t-before.17061.17061.3	controllerType=0 controllerNumber=1 scan=17061	63.3003
R.C[+57.021]NTAAPMWLN[+2569.905]GTHPSSDEGIVSR.K	HexNAc(5)Hex(6)NeuAc(2)	C[+57], N[+2570]	1690.35	3	5069.04	5070.04	-1	0.6	223	Specific	277.57	277.57	180.02	5.51	196	>sp|P07911|UROM_HUMAN Uromodulin OS=Homo sapiens OX=9606 GN=UMOD PE=1 SV=1	1	20230315_zy_umod_t-before.17051.17051.3	controllerType=0 controllerNumber=1 scan=17051	63.2587
R.C[+57.021]NTAAPM[+15.995]WLN[+2569.905]GTHPSSDEGIVSR.K	HexNAc(5)Hex(6)NeuAc(2)	C[+57], M[+16], N[+2570]	1272.26	4	5086.01	5086.03	0	-4.6	223	Specific	340.99	340.99	340.99	5.56	196	>sp|P07911|UROM_HUMAN Uromodulin OS=Homo sapiens OX=9606 GN=UMOD PE=1 SV=1	1	20230315_zy_umod_t-before.6598.6598.4	controllerType=0 controllerNumber=1 scan=6598	24.72
R.C[+57.021]NTAAPMWLN[+2569.905]GTHPSSDEGIVSR.K	HexNAc(5)Hex(6)NeuAc(2)	C[+57], N[+2570]	1268.27	4	5070.04	5070.04	0	0.9	223	Specific	402.17	402.17	183.64	6.5	196	>sp|P07911|UROM_HUMAN Uromodulin OS=Homo sapiens OX=9606 GN=UMOD PE=1 SV=1	1	20230315_zy_umod_t-before.17153.17153.4	controllerType=0 controllerNumber=1 scan=17153	63.6488
R.C[+57.021]NTAAPM[+15.995]WLN[+2569.905]GTHPSSDEGIVSR.K	HexNAc(5)Hex(6)NeuAc(2)	C[+57], M[+16], N[+2570]	1272.26	4	5086.03	5086.03	0	-1.7	223	Specific	447.3	447.3	136.05	7.2	196	>sp|P07911|UROM_HUMAN Uromodulin OS=Homo sapiens OX=9606 GN=UMOD PE=1 SV=1	1	20230315_zy_umod_t-before.14780.14780.4	controllerType=0 controllerNumber=1 scan=14780	55.1843
R.C[+57.021]NTAAPM[+15.995]WLN[+2569.905]GTHPSSDEGIVSR.K	HexNAc(5)Hex(6)NeuAc(2)	C[+57], M[+16], N[+2570]	1272.26	4	5086.04	5086.03	0	0.8	223	Specific	447.4	447.4	187.4	7.2	196	>sp|P07911|UROM_HUMAN Uromodulin OS=Homo sapiens OX=9606 GN=UMOD PE=1 SV=1	1	20230315_zy_umod_t-before.14556.14556.4	controllerType=0 controllerNumber=1 scan=14556	54.4013
R.C[+57.021]NTAAPMWLN[+2569.905]GTHPSSDEGIVSR.K	HexNAc(5)Hex(6)NeuAc(2)	C[+57], N[+2570]	1690.68	3	5070.03	5070.04	0	-1.7	223	Specific	533.06	533.06	242.1	7.89	196	>sp|P07911|UROM_HUMAN Uromodulin OS=Homo sapiens OX=9606 GN=UMOD PE=1 SV=1	1	20230315_zy_umod_t-before.16879.16879.3	controllerType=0 controllerNumber=1 scan=16879	62.6309
R.C[+57.021]NTAAPM[+15.995]WLN[+2569.905]GTHPSSDEGIVSR.K	HexNAc(5)Hex(6)NeuAc(2)	C[+57], M[+16], N[+2570]	1272.26	4	5086.04	5086.03	0	0.6	223	Specific	567.37	567.37	232.21	8.47	196	>sp|P07911|UROM_HUMAN Uromodulin OS=Homo sapiens OX=9606 GN=UMOD PE=1 SV=1	1	20230315_zy_umod_t-before.14799.14799.4	controllerType=0 controllerNumber=1 scan=14799	55.2555
R.C[+57.021]NTAAPM[+15.995]WLN[+2569.905]GTHPSSDEGIVSR.K	HexNAc(5)Hex(6)NeuAc(2)	C[+57], M[+16], N[+2570]	1272.01	4	5085.02	5086.03	-1	-2	223	Specific	635.75	635.75	635.75	9.47	196	>sp|P07911|UROM_HUMAN Uromodulin OS=Homo sapiens OX=9606 GN=UMOD PE=1 SV=1	1	20230315_zy_umod_t-before.14678.14678.4	controllerType=0 controllerNumber=1 scan=14678	54.8109
R.C[+57.021]NTAAPM[+15.995]WLN[+2569.905]GTHPSSDEGIVSR.K	HexNAc(5)Hex(6)NeuAc(2)	C[+57], M[+16], N[+2570]	1272.52	4	5087.04	5086.03	1	0.7	223	Specific	687.42	652.51	193.93	10.47	196	>sp|P07911|UROM_HUMAN Uromodulin OS=Homo sapiens OX=9606 GN=UMOD PE=1 SV=1	1	20230315_zy_umod_t-before.14772.14772.4	controllerType=0 controllerNumber=1 scan=14772	55.1564
R.C[+57.021]NTAAPMWLN[+2569.905]GTHPSSDEGIVSR.K	HexNAc(5)Hex(6)NeuAc(2)	C[+57], N[+2570]	1268.27	4	5070.05	5070.04	0	2.4	223	Specific	707.18	707.18	367.06	11.06	196	>sp|P07911|UROM_HUMAN Uromodulin OS=Homo sapiens OX=9606 GN=UMOD PE=1 SV=1	1	20230315_zy_umod_t-before.17020.17020.4	controllerType=0 controllerNumber=1 scan=17020	63.1488
R.C[+57.021]NTAAPM[+15.995]WLN[+2861.000]GTHPSSDEGIVSR.K	HexNAc(5)Hex(6)NeuAc(3)	C[+57], M[+16], N[+2861]	1345.04	4	5377.14	5377.13	0	1.9	223	Specific	343.73	343.73	111	5.34	196	>sp|P07911|UROM_HUMAN Uromodulin OS=Homo sapiens OX=9606 GN=UMOD PE=1 SV=1	1	20230315_zy_umod_t-before.16260.16260.4	controllerType=0 controllerNumber=1 scan=16260	60.411
R.C[+57.021]NTAAPMWLN[+2861.000]GTHPSSDEGIVSR.K	HexNAc(5)Hex(6)NeuAc(3)	C[+57], N[+2861]	1340.78	4	5360.1	5361.13	-1	-5.5	223	Specific	397.72	397.72	397.72	6.95	196	>sp|P07911|UROM_HUMAN Uromodulin OS=Homo sapiens OX=9606 GN=UMOD PE=1 SV=1	1	20230315_zy_umod_t-before.19043.19043.4	controllerType=0 controllerNumber=1 scan=19043	70.1637
R.C[+57.021]NTAAPM[+15.995]WLN[+2861.000]GTHPSSDEGIVSR.K	HexNAc(5)Hex(6)NeuAc(3)	C[+57], M[+16], N[+2861]	1344.79	4	5376.13	5377.13	-1	0.8	223	Specific	441.94	441.94	441.94	7.2	196	>sp|P07911|UROM_HUMAN Uromodulin OS=Homo sapiens OX=9606 GN=UMOD PE=1 SV=1	1	20230315_zy_umod_t-before.16255.16255.4	controllerType=0 controllerNumber=1 scan=16255	60.3935
R.C[+57.021]NTAAPM[+15.995]WLN[+2861.000]GTHPSSDEGIVSR.K	HexNAc(5)Hex(6)NeuAc(3)	C[+57], M[+16], N[+2861]	1793.05	3	5377.14	5377.13	0	2.2	223	Specific	547.89	547.89	78.5	7.47	196	>sp|P07911|UROM_HUMAN Uromodulin OS=Homo sapiens OX=9606 GN=UMOD PE=1 SV=1	1	20230315_zy_umod_t-before.16428.16428.3	controllerType=0 controllerNumber=1 scan=16428	61.0205
R.C[+57.021]NTAAPMWLN[+2861.000]GTHPSSDEGIVSR.K	HexNAc(5)Hex(6)NeuAc(3)	C[+57], N[+2861]	1787.39	3	5360.15	5361.13	-1	4.3	223	Specific	553.99	553.99	553.99	6.73	196	>sp|P07911|UROM_HUMAN Uromodulin OS=Homo sapiens OX=9606 GN=UMOD PE=1 SV=1	1	20230315_zy_umod_t-before.18358.18358.3	controllerType=0 controllerNumber=1 scan=18358	67.8894
R.C[+57.021]NTAAPM[+15.995]WLN[+2861.000]GTHPSSDEGIVSR.K	HexNAc(5)Hex(6)NeuAc(3)	C[+57], M[+16], N[+2861]	1344.78	4	5376.11	5377.13	-1	-2.1	223	Specific	573.63	573.63	573.63	8.47	196	>sp|P07911|UROM_HUMAN Uromodulin OS=Homo sapiens OX=9606 GN=UMOD PE=1 SV=1	1	20230315_zy_umod_t-before.16309.16309.3	controllerType=0 controllerNumber=1 scan=16309	60.5971
R.C[+57.021]NTAAPMWLN[+2861.000]GTHPSSDEGIVSR.K	HexNAc(5)Hex(6)NeuAc(3)	C[+57], N[+2861]	1341.04	4	5361.14	5361.13	0	0.7	223	Specific	576.7	576.7	576.7	8.47	196	>sp|P07911|UROM_HUMAN Uromodulin OS=Homo sapiens OX=9606 GN=UMOD PE=1 SV=1	1	20230315_zy_umod_t-before.18242.18242.4	controllerType=0 controllerNumber=1 scan=18242	67.4836
R.C[+57.021]NTAAPM[+15.995]WLN[+2861.000]GTHPSSDEGIVSR.K	HexNAc(5)Hex(6)NeuAc(3)	C[+57], M[+16], N[+2861]	1344.78	4	5376.11	5377.13	-1	-3.1	223	Specific	591.03	591.03	591.03	8.47	196	>sp|P07911|UROM_HUMAN Uromodulin OS=Homo sapiens OX=9606 GN=UMOD PE=1 SV=1	1	20230315_zy_umod_t-before.16300.16300.4	controllerType=0 controllerNumber=1 scan=16300	60.5571
R.C[+57.021]NTAAPM[+15.995]WLN[+2861.000]GTHPSSDEGIVSR.K	HexNAc(5)Hex(6)NeuAc(3)	C[+57], M[+16], N[+2861]	1344.79	4	5376.12	5377.13	-1	-0.3	223	Specific	593.45	593.45	593.45	8.47	196	>sp|P07911|UROM_HUMAN Uromodulin OS=Homo sapiens OX=9606 GN=UMOD PE=1 SV=1	1	20230315_zy_umod_t-before.16294.16294.4	controllerType=0 controllerNumber=1 scan=16294	60.5424
R.C[+57.021]NTAAPMWLN[+2861.000]GTHPSSDEGIVSR.K	HexNAc(5)Hex(6)NeuAc(3)	C[+57], N[+2861]	1340.79	4	5360.12	5361.13	-1	-2.3	223	Specific	615.13	615.13	615.13	9.47	196	>sp|P07911|UROM_HUMAN Uromodulin OS=Homo sapiens OX=9606 GN=UMOD PE=1 SV=1	1	20230315_zy_umod_t-before.18257.18257.4	controllerType=0 controllerNumber=1 scan=18257	67.5341
R.C[+57.021]NTAAPMWLN[+2861.000]GTHPSSDEGIVSR.K	HexNAc(5)Hex(6)NeuAc(3)	C[+57], N[+2861]	1340.79	4	5360.13	5361.13	-1	-0.3	223	Specific	637.17	637.17	637.17	9.47	196	>sp|P07911|UROM_HUMAN Uromodulin OS=Homo sapiens OX=9606 GN=UMOD PE=1 SV=1	1	20230315_zy_umod_t-before.18403.18403.4	controllerType=0 controllerNumber=1 scan=18403	68.0439
R.C[+57.021]NTAAPMWLN[+2861.000]GTHPSSDEGIVSR.K	HexNAc(5)Hex(6)NeuAc(3)	C[+57], N[+2861]	1341.04	4	5361.15	5361.13	0	2.2	223	Specific	652.63	652.63	652.63	10.06	196	>sp|P07911|UROM_HUMAN Uromodulin OS=Homo sapiens OX=9606 GN=UMOD PE=1 SV=1	1	20230315_zy_umod_t-before.18357.18357.4	controllerType=0 controllerNumber=1 scan=18357	67.8879
R.C[+57.021]NTAAPM[+15.995]WLN[+2861.000]GTHPSSDEGIVSR.K	HexNAc(5)Hex(6)NeuAc(3)	C[+57], M[+16], N[+2861]	1345.04	4	5377.14	5377.13	0	1.6	223	Specific	684.09	684.09	212.41	10.11	196	>sp|P07911|UROM_HUMAN Uromodulin OS=Homo sapiens OX=9606 GN=UMOD PE=1 SV=1	1	20230315_zy_umod_t-before.16426.16426.4	controllerType=0 controllerNumber=1 scan=16426	61.0154
R.C[+57.021]NTAAPM[+15.995]WLN[+2861.000]GTHPSSDEGIVSR.K	HexNAc(5)Hex(6)NeuAc(3)	C[+57], M[+16], N[+2861]	1345.04	4	5377.14	5377.13	0	1.7	223	Specific	717.46	717.46	126.55	11.11	196	>sp|P07911|UROM_HUMAN Uromodulin OS=Homo sapiens OX=9606 GN=UMOD PE=1 SV=1	1	20230315_zy_umod_t-before.16431.16431.4	controllerType=0 controllerNumber=1 scan=16431	61.0268
R.C[+57.021]NTAAPMWLN[+2861.000]GTHPSSDEGIVSR.K	HexNAc(5)Hex(6)NeuAc(3)	C[+57], N[+2861]	1341.04	4	5361.15	5361.13	0	2.8	223	Specific	717.69	717.69	717.69	10.76	196	>sp|P07911|UROM_HUMAN Uromodulin OS=Homo sapiens OX=9606 GN=UMOD PE=1 SV=1	1	20230315_zy_umod_t-before.18322.18322.4	controllerType=0 controllerNumber=1 scan=18322	67.7586
R.C[+57.021]NTAAPMWLN[+2861.000]GTHPSSDEGIVSR.K	HexNAc(5)Hex(6)NeuAc(3)	C[+57], N[+2861]	1340.79	4	5360.14	5361.13	-1	1.4	223	Specific	784.95	784.95	784.95	12.11	196	>sp|P07911|UROM_HUMAN Uromodulin OS=Homo sapiens OX=9606 GN=UMOD PE=1 SV=1	1	20230315_zy_umod_t-before.18439.18439.4	controllerType=0 controllerNumber=1 scan=18439	68.1578
R.C[+57.021]NTAAPMWLN[+2861.000]GTHPSSDEGIVSR.K	HexNAc(5)Hex(6)NeuAc(3)	C[+57], N[+2861]	1341.04	4	5361.14	5361.13	0	1.9	223	Specific	825.14	825.14	825.14	13.11	196	>sp|P07911|UROM_HUMAN Uromodulin OS=Homo sapiens OX=9606 GN=UMOD PE=1 SV=1	1	20230315_zy_umod_t-before.18411.18411.4	controllerType=0 controllerNumber=1 scan=18411	68.0738
R.C[+57.021]NTAAPMWLN[+2861.000]GTHPSSDEGIVSR.K	HexNAc(5)Hex(6)NeuAc(3)	C[+57], N[+2861]	1341.04	4	5361.14	5361.13	0	1.9	223	Specific	838.2	838.2	838.2	13.11	196	>sp|P07911|UROM_HUMAN Uromodulin OS=Homo sapiens OX=9606 GN=UMOD PE=1 SV=1	1	20230315_zy_umod_t-before.18348.18348.4	controllerType=0 controllerNumber=1 scan=18348	67.848
R.C[+57.021]NTAAPMWLN[+2878.015]GTHPSSDEGIVSR.K	HexNAc(5)Hex(7)Fuc(1)NeuAc(2)	C[+57], N[+2878]	1793.72	3	5379.13	5378.15	1	-4.2	223	Specific	244.09	244.09	244.09	5.41	196	>sp|P07911|UROM_HUMAN Uromodulin OS=Homo sapiens OX=9606 GN=UMOD PE=1 SV=1	1	20230315_zy_umod_t-before.17669.17669.3	controllerType=0 controllerNumber=1 scan=17669	65.4696
R.C[+57.021]NTAAPM[+15.995]WLN[+1704.635]GTHPSSDEGIVSR.K	HexNAc(6)Hex(3)	C[+57], M[+16], N[+1705]	1055.95	4	4220.77	4220.76	0	2	223	Specific	280.97	280.97	280.97	3.5	196	>sp|P07911|UROM_HUMAN Uromodulin OS=Homo sapiens OX=9606 GN=UMOD PE=1 SV=1	1	20230315_zy_umod_t-before.11725.11725.4	controllerType=0 controllerNumber=1 scan=11725	43.792
R.C[+57.021]NTAAPM[+15.995]WLN[+1704.635]GTHPSSDEGIVSR.K	HexNAc(6)Hex(3)	C[+57], M[+16], N[+1705]	1407.6	3	4220.78	4220.76	0	2.8	223	Specific	308.65	308.65	308.65	4.82	196	>sp|P07911|UROM_HUMAN Uromodulin OS=Homo sapiens OX=9606 GN=UMOD PE=1 SV=1	1	20230315_zy_umod_t-before.11816.11816.3	controllerType=0 controllerNumber=1 scan=11816	44.1322
R.C[+57.021]NTAAPM[+15.995]WLN[+1704.635]GTHPSSDEGIVSR.K	HexNAc(6)Hex(3)	C[+57], M[+16], N[+1705]	1055.95	4	4220.77	4220.76	0	1.4	223	Specific	520.1	520.1	520.1	6.91	196	>sp|P07911|UROM_HUMAN Uromodulin OS=Homo sapiens OX=9606 GN=UMOD PE=1 SV=1	1	20230315_zy_umod_t-before.11744.11744.4	controllerType=0 controllerNumber=1 scan=11744	43.8634
R.C[+57.021]NTAAPM[+15.995]WLN[+1704.635]GTHPSSDEGIVSR.K	HexNAc(6)Hex(3)	C[+57], M[+16], N[+1705]	1407.6	3	4220.77	4220.76	0	2.2	223	Specific	557.77	557.77	557.77	7.47	196	>sp|P07911|UROM_HUMAN Uromodulin OS=Homo sapiens OX=9606 GN=UMOD PE=1 SV=1	1	20230315_zy_umod_t-before.11809.11809.3	controllerType=0 controllerNumber=1 scan=11809	44.1094
R.C[+57.021]NTAAPM[+15.995]WLN[+1704.635]GTHPSSDEGIVSR.K	HexNAc(6)Hex(3)	C[+57], M[+16], N[+1705]	1407.26	3	4219.77	4220.76	-1	1.1	223	Specific	568.22	568.22	568.22	8.37	196	>sp|P07911|UROM_HUMAN Uromodulin OS=Homo sapiens OX=9606 GN=UMOD PE=1 SV=1	1	20230315_zy_umod_t-before.11729.11729.3	controllerType=0 controllerNumber=1 scan=11729	43.8085
R.C[+57.021]NTAAPMWLN[+1704.635]GTHPSSDEGIVSR.K	HexNAc(6)Hex(3)	C[+57], N[+1705]	1402.26	3	4204.78	4204.77	0	2.1	223	Specific	673.65	673.65	673.65	10.5	196	>sp|P07911|UROM_HUMAN Uromodulin OS=Homo sapiens OX=9606 GN=UMOD PE=1 SV=1	1	20230315_zy_umod_t-before.13652.13652.3	controllerType=0 controllerNumber=1 scan=13652	50.9744
R.C[+57.021]NTAAPMWLN[+1704.635]GTHPSSDEGIVSR.K	HexNAc(6)Hex(3)	C[+57], N[+1705]	1402.26	3	4204.78	4204.77	0	2.1	223	Specific	817.4	817.4	817.4	13.5	196	>sp|P07911|UROM_HUMAN Uromodulin OS=Homo sapiens OX=9606 GN=UMOD PE=1 SV=1	1	20230315_zy_umod_t-before.13646.13646.3	controllerType=0 controllerNumber=1 scan=13646	50.9583
R.C[+57.021]NTAAPMWLN[+1704.635]GTHPSSDEGIVSR.K	HexNAc(6)Hex(3)	C[+57], N[+1705]	1051.95	4	4204.78	4204.77	0	2.2	223	Specific	833.09	833.09	833.09	13.06	196	>sp|P07911|UROM_HUMAN Uromodulin OS=Homo sapiens OX=9606 GN=UMOD PE=1 SV=1	1	20230315_zy_umod_t-before.13648.13648.4	controllerType=0 controllerNumber=1 scan=13648	50.9644
R.C[+57.021]NTAAPM[+15.995]WLN[+1850.693]GTHPSSDEGIVSR.K	HexNAc(6)Hex(3)Fuc(1)	C[+57], M[+16], N[+1851]	1456.28	3	4366.83	4366.82	0	2.5	223	Specific	278.37	278.37	119.5	4.8	196	>sp|P07911|UROM_HUMAN Uromodulin OS=Homo sapiens OX=9606 GN=UMOD PE=1 SV=1	1	20230315_zy_umod_t-before.11492.11492.3	controllerType=0 controllerNumber=1 scan=11492	42.8899
R.C[+57.021]NTAAPMWLN[+1850.693]GTHPSSDEGIVSR.K	HexNAc(6)Hex(3)Fuc(1)	C[+57], N[+1851]	1450.95	3	4350.84	4350.83	0	2.8	223	Specific	409.64	409.64	409.64	6.77	196	>sp|P07911|UROM_HUMAN Uromodulin OS=Homo sapiens OX=9606 GN=UMOD PE=1 SV=1	1	20230315_zy_umod_t-before.13478.13478.3	controllerType=0 controllerNumber=1 scan=13478	50.317
R.C[+57.021]NTAAPMWLN[+1850.693]GTHPSSDEGIVSR.K	HexNAc(6)Hex(3)Fuc(1)	C[+57], N[+1851]	1088.71	4	4351.83	4350.83	1	1	223	Specific	541.78	541.78	541.78	6.91	196	>sp|P07911|UROM_HUMAN Uromodulin OS=Homo sapiens OX=9606 GN=UMOD PE=1 SV=1	1	20230315_zy_umod_t-before.13566.13566.4	controllerType=0 controllerNumber=1 scan=13566	50.6543
R.C[+57.021]NTAAPMWLN[+1850.693]GTHPSSDEGIVSR.K	HexNAc(6)Hex(3)Fuc(1)	C[+57], N[+1851]	1450.61	3	4349.83	4350.83	-1	1.4	223	Specific	583.09	583.09	583.09	8.54	196	>sp|P07911|UROM_HUMAN Uromodulin OS=Homo sapiens OX=9606 GN=UMOD PE=1 SV=1	1	20230315_zy_umod_t-before.13565.13565.3	controllerType=0 controllerNumber=1 scan=13565	50.6509
R.C[+57.021]NTAAPMWLN[+1850.693]GTHPSSDEGIVSR.K	HexNAc(6)Hex(3)Fuc(1)	C[+57], N[+1851]	1450.61	3	4349.83	4350.83	-1	0.6	223	Specific	596.02	596.02	596.02	8.91	196	>sp|P07911|UROM_HUMAN Uromodulin OS=Homo sapiens OX=9606 GN=UMOD PE=1 SV=1	1	20230315_zy_umod_t-before.13461.13461.3	controllerType=0 controllerNumber=1 scan=13461	50.2545
R.C[+57.021]NTAAPMWLN[+1850.693]GTHPSSDEGIVSR.K	HexNAc(6)Hex(3)Fuc(1)	C[+57], N[+1851]	1088.46	4	4350.83	4350.83	0	1.2	223	Specific	701.93	701.93	701.93	10.93	196	>sp|P07911|UROM_HUMAN Uromodulin OS=Homo sapiens OX=9606 GN=UMOD PE=1 SV=1	1	20230315_zy_umod_t-before.13484.13484.4	controllerType=0 controllerNumber=1 scan=13484	50.3457
R.C[+57.021]NTAAPMWLN[+1850.693]GTHPSSDEGIVSR.K	HexNAc(6)Hex(3)Fuc(1)	C[+57], N[+1851]	1450.95	3	4350.83	4350.83	0	1.6	223	Specific	704.45	704.45	704.45	11.54	196	>sp|P07911|UROM_HUMAN Uromodulin OS=Homo sapiens OX=9606 GN=UMOD PE=1 SV=1	1	20230315_zy_umod_t-before.13472.13472.3	controllerType=0 controllerNumber=1 scan=13472	50.2988
R.C[+57.021]NTAAPMWLN[+2141.788]GTHPSSDEGIVSR.K	HexNAc(6)Hex(3)Fuc(1)NeuAc(1)	C[+57], N[+2142]	1548.3	3	4642.9	4641.92	1	-6	223	Specific	259.61	259.61	259.61	5.51	196	>sp|P07911|UROM_HUMAN Uromodulin OS=Homo sapiens OX=9606 GN=UMOD PE=1 SV=1	1	20230315_zy_umod_t-before.16935.16935.3	controllerType=0 controllerNumber=1 scan=16935	62.8389
R.C[+57.021]NTAAPM[+15.995]WLN[+2141.788]GTHPSSDEGIVSR.K	HexNAc(6)Hex(3)Fuc(1)NeuAc(1)	C[+57], M[+16], N[+2142]	1553.31	3	4657.92	4657.92	0	1.5	223	Specific	266.27	266.27	123.05	5.15	196	>sp|P07911|UROM_HUMAN Uromodulin OS=Homo sapiens OX=9606 GN=UMOD PE=1 SV=1	1	20230315_zy_umod_t-before.12931.12931.3	controllerType=0 controllerNumber=1 scan=12931	48.2505
R.C[+57.021]NTAAPMWLN[+2141.788]GTHPSSDEGIVSR.K	HexNAc(6)Hex(3)Fuc(1)NeuAc(1)	C[+57], N[+2142]	1547.64	3	4640.91	4641.92	-1	-2.1	223	Specific	271.34	271.34	271.34	5.51	196	>sp|P07911|UROM_HUMAN Uromodulin OS=Homo sapiens OX=9606 GN=UMOD PE=1 SV=1	1	20230315_zy_umod_t-before.16966.16966.3	controllerType=0 controllerNumber=1 scan=16966	62.9452
R.C[+57.021]NTAAPMWLN[+2141.788]GTHPSSDEGIVSR.K	HexNAc(6)Hex(3)Fuc(1)NeuAc(1)	C[+57], N[+2142]	1547.98	3	4641.93	4641.92	0	1.7	223	Specific	483.56	483.56	483.56	7.29	196	>sp|P07911|UROM_HUMAN Uromodulin OS=Homo sapiens OX=9606 GN=UMOD PE=1 SV=1	1	20230315_zy_umod_t-before.15079.15079.3	controllerType=0 controllerNumber=1 scan=15079	56.2728
R.C[+57.021]NTAAPM[+15.995]WLN[+2141.788]GTHPSSDEGIVSR.K	HexNAc(6)Hex(3)Fuc(1)NeuAc(1)	C[+57], M[+16], N[+2142]	1553.31	3	4657.93	4657.92	0	2.5	223	Specific	540.71	540.71	126.25	7.47	196	>sp|P07911|UROM_HUMAN Uromodulin OS=Homo sapiens OX=9606 GN=UMOD PE=1 SV=1	1	20230315_zy_umod_t-before.13031.13031.3	controllerType=0 controllerNumber=1 scan=13031	48.6307
R.C[+57.021]NTAAPM[+15.995]WLN[+2141.788]GTHPSSDEGIVSR.K	HexNAc(6)Hex(3)Fuc(1)NeuAc(1)	C[+57], M[+16], N[+2142]	1553.31	3	4657.93	4657.92	0	2.3	223	Specific	543.98	543.98	80.41	7.47	196	>sp|P07911|UROM_HUMAN Uromodulin OS=Homo sapiens OX=9606 GN=UMOD PE=1 SV=1	1	20230315_zy_umod_t-before.12938.12938.3	controllerType=0 controllerNumber=1 scan=12938	48.2786
R.C[+57.021]NTAAPM[+15.995]WLN[+2141.788]GTHPSSDEGIVSR.K	HexNAc(6)Hex(3)Fuc(1)NeuAc(1)	C[+57], M[+16], N[+2142]	1165.24	4	4657.92	4657.92	0	0.7	223	Specific	565.13	565.13	160.18	8.47	196	>sp|P07911|UROM_HUMAN Uromodulin OS=Homo sapiens OX=9606 GN=UMOD PE=1 SV=1	1	20230315_zy_umod_t-before.13023.13023.4	controllerType=0 controllerNumber=1 scan=13023	48.5967
R.C[+57.021]NTAAPM[+15.995]WLN[+2141.788]GTHPSSDEGIVSR.K	HexNAc(6)Hex(3)Fuc(1)NeuAc(1)	C[+57], M[+16], N[+2142]	1165.49	4	4658.92	4657.92	1	0.5	223	Specific	689.01	689.01	250.75	10.47	196	>sp|P07911|UROM_HUMAN Uromodulin OS=Homo sapiens OX=9606 GN=UMOD PE=1 SV=1	1	20230315_zy_umod_t-before.13030.13030.4	controllerType=0 controllerNumber=1 scan=13030	48.6273
R.C[+57.021]NTAAPM[+15.995]WLN[+2141.788]GTHPSSDEGIVSR.K	HexNAc(6)Hex(3)Fuc(1)NeuAc(1)	C[+57], M[+16], N[+2142]	1165.24	4	4657.92	4657.92	0	0.8	223	Specific	716.73	716.73	261.31	10.93	196	>sp|P07911|UROM_HUMAN Uromodulin OS=Homo sapiens OX=9606 GN=UMOD PE=1 SV=1	1	20230315_zy_umod_t-before.12923.12923.4	controllerType=0 controllerNumber=1 scan=12923	48.2231
R.C[+57.021]NTAAPMWLN[+2141.788]GTHPSSDEGIVSR.K	HexNAc(6)Hex(3)Fuc(1)NeuAc(1)	C[+57], N[+2142]	1547.98	3	4641.93	4641.92	0	1.5	223	Specific	753.57	753.57	753.57	12.54	196	>sp|P07911|UROM_HUMAN Uromodulin OS=Homo sapiens OX=9606 GN=UMOD PE=1 SV=1	1	20230315_zy_umod_t-before.15042.15042.3	controllerType=0 controllerNumber=1 scan=15042	56.1428
R.C[+57.021]NTAAPMWLN[+2141.788]GTHPSSDEGIVSR.K	HexNAc(6)Hex(3)Fuc(1)NeuAc(1)	C[+57], N[+2142]	1161.24	4	4641.93	4641.92	0	1.2	223	Specific	756.01	756.01	756.01	11.93	196	>sp|P07911|UROM_HUMAN Uromodulin OS=Homo sapiens OX=9606 GN=UMOD PE=1 SV=1	1	20230315_zy_umod_t-before.15044.15044.4	controllerType=0 controllerNumber=1 scan=15044	56.1484
R.C[+57.021]NTAAPM[+15.995]WLN[+2432.884]GTHPSSDEGIVSR.K	HexNAc(6)Hex(3)Fuc(1)NeuAc(2)	C[+57], M[+16], N[+2433]	1238.01	4	4949.02	4949.01	0	1.2	223	Specific	313.18	313.18	313.18	2.96	196	>sp|P07911|UROM_HUMAN Uromodulin OS=Homo sapiens OX=9606 GN=UMOD PE=1 SV=1	1	20230315_zy_umod_t-before.11379.11379.4	controllerType=0 controllerNumber=1 scan=11379	42.4484
R.C[+57.021]NTAAPM[+15.995]WLN[+2432.884]GTHPSSDEGIVSR.K	HexNAc(6)Hex(3)Fuc(1)NeuAc(2)	C[+57], M[+16], N[+2433]	1238.01	4	4949.02	4949.01	0	1.3	223	Specific	323.88	323.88	323.88	3.85	196	>sp|P07911|UROM_HUMAN Uromodulin OS=Homo sapiens OX=9606 GN=UMOD PE=1 SV=1	1	20230315_zy_umod_t-before.11374.11374.4	controllerType=0 controllerNumber=1 scan=11374	42.4353
R.C[+57.021]NTAAPM[+15.995]WLN[+2012.745]GTHPSSDEGIVSR.K	HexNAc(6)Hex(4)Fuc(1)	C[+57], M[+16], N[+2013]	1132.72	4	4527.85	4528.87	-1	-4.4	223	Specific	214.87	214.87	34.21	3.55	196	>sp|P07911|UROM_HUMAN Uromodulin OS=Homo sapiens OX=9606 GN=UMOD PE=1 SV=1	1	20230315_zy_umod_t-before.12450.12450.4	controllerType=0 controllerNumber=1 scan=12450	46.4105
R.C[+57.021]NTAAPMWLN[+2012.745]GTHPSSDEGIVSR.K	HexNAc(6)Hex(4)Fuc(1)	C[+57], N[+2013]	1504.63	3	4511.87	4512.88	-1	-1.9	223	Specific	217.52	217.52	217.52	5.15	196	>sp|P07911|UROM_HUMAN Uromodulin OS=Homo sapiens OX=9606 GN=UMOD PE=1 SV=1	1	20230315_zy_umod_t-before.13261.13261.3	controllerType=0 controllerNumber=1 scan=13261	49.5058
R.C[+57.021]NTAAPMWLN[+2012.745]GTHPSSDEGIVSR.K	HexNAc(6)Hex(4)Fuc(1)	C[+57], N[+2013]	1128.72	4	4511.86	4512.88	-1	-3	223	Specific	290.61	290.61	290.61	5.09	196	>sp|P07911|UROM_HUMAN Uromodulin OS=Homo sapiens OX=9606 GN=UMOD PE=1 SV=1	1	20230315_zy_umod_t-before.10225.10225.4	controllerType=0 controllerNumber=1 scan=10225	37.9945
R.C[+57.021]NTAAPMWLN[+2012.745]GTHPSSDEGIVSR.K	HexNAc(6)Hex(4)Fuc(1)	C[+57], N[+2013]	1504.63	3	4511.87	4512.88	-1	-1.5	223	Specific	308.46	308.46	308.46	5.53	196	>sp|P07911|UROM_HUMAN Uromodulin OS=Homo sapiens OX=9606 GN=UMOD PE=1 SV=1	1	20230315_zy_umod_t-before.13288.13288.3	controllerType=0 controllerNumber=1 scan=13288	49.6005
R.C[+57.021]NTAAPMWLN[+2012.745]GTHPSSDEGIVSR.K	HexNAc(6)Hex(4)Fuc(1)	C[+57], N[+2013]	1128.72	4	4511.86	4512.88	-1	-3	223	Specific	316.38	316.38	316.38	4.09	196	>sp|P07911|UROM_HUMAN Uromodulin OS=Homo sapiens OX=9606 GN=UMOD PE=1 SV=1	1	20230315_zy_umod_t-before.10132.10132.4	controllerType=0 controllerNumber=1 scan=10132	37.6398
R.C[+57.021]NTAAPMWLN[+2012.745]GTHPSSDEGIVSR.K	HexNAc(6)Hex(4)Fuc(1)	C[+57], N[+2013]	1128.72	4	4511.87	4512.88	-1	-2.3	223	Specific	341.65	341.65	341.65	3.93	196	>sp|P07911|UROM_HUMAN Uromodulin OS=Homo sapiens OX=9606 GN=UMOD PE=1 SV=1	1	20230315_zy_umod_t-before.10124.10124.4	controllerType=0 controllerNumber=1 scan=10124	37.604
R.C[+57.021]NTAAPMWLN[+2012.745]GTHPSSDEGIVSR.K	HexNAc(6)Hex(4)Fuc(1)	C[+57], N[+2013]	1504.63	3	4511.87	4512.88	-1	-1.4	223	Specific	341.87	341.87	341.87	6.14	196	>sp|P07911|UROM_HUMAN Uromodulin OS=Homo sapiens OX=9606 GN=UMOD PE=1 SV=1	1	20230315_zy_umod_t-before.13384.13384.3	controllerType=0 controllerNumber=1 scan=13384	49.9584
R.C[+57.021]NTAAPMWLN[+2012.745]GTHPSSDEGIVSR.K	HexNAc(6)Hex(4)Fuc(1)	C[+57], N[+2013]	1128.72	4	4511.86	4512.88	-1	-3.7	223	Specific	378.59	378.59	378.59	6.95	196	>sp|P07911|UROM_HUMAN Uromodulin OS=Homo sapiens OX=9606 GN=UMOD PE=1 SV=1	1	20230315_zy_umod_t-before.13285.13285.4	controllerType=0 controllerNumber=1 scan=13285	49.5932
R.C[+57.021]NTAAPMWLN[+2012.745]GTHPSSDEGIVSR.K	HexNAc(6)Hex(4)Fuc(1)	C[+57], N[+2013]	1504.63	3	4511.87	4512.88	-1	-2.4	223	Specific	409.36	409.36	409.36	7.48	196	>sp|P07911|UROM_HUMAN Uromodulin OS=Homo sapiens OX=9606 GN=UMOD PE=1 SV=1	1	20230315_zy_umod_t-before.13269.13269.3	controllerType=0 controllerNumber=1 scan=13269	49.5381
R.C[+57.021]NTAAPMWLN[+2012.745]GTHPSSDEGIVSR.K	HexNAc(6)Hex(4)Fuc(1)	C[+57], N[+2013]	1504.63	3	4511.87	4512.88	-1	-1.6	223	Specific	411.31	411.31	411.31	7.48	196	>sp|P07911|UROM_HUMAN Uromodulin OS=Homo sapiens OX=9606 GN=UMOD PE=1 SV=1	1	20230315_zy_umod_t-before.13281.13281.3	controllerType=0 controllerNumber=1 scan=13281	49.5828
R.C[+57.021]NTAAPMWLN[+2012.745]GTHPSSDEGIVSR.K	HexNAc(6)Hex(4)Fuc(1)	C[+57], N[+2013]	1504.63	3	4511.87	4512.88	-1	-2.3	223	Specific	423.76	423.76	423.76	7.48	196	>sp|P07911|UROM_HUMAN Uromodulin OS=Homo sapiens OX=9606 GN=UMOD PE=1 SV=1	1	20230315_zy_umod_t-before.13379.13379.3	controllerType=0 controllerNumber=1 scan=13379	49.9449
R.C[+57.021]NTAAPMWLN[+2012.745]GTHPSSDEGIVSR.K	HexNAc(6)Hex(4)Fuc(1)	C[+57], N[+2013]	1128.72	4	4511.87	4512.88	-1	-2.3	223	Specific	464.92	464.92	464.92	7.2	196	>sp|P07911|UROM_HUMAN Uromodulin OS=Homo sapiens OX=9606 GN=UMOD PE=1 SV=1	1	20230315_zy_umod_t-before.10205.10205.4	controllerType=0 controllerNumber=1 scan=10205	37.9104
R.C[+57.021]NTAAPMWLN[+2157.783]GTHPSSDEGIVSR.K	HexNAc(6)Hex(4)NeuAc(1)	C[+57], N[+2158]	1552.98	3	4656.92	4657.92	-1	1.5	223	Specific	220.6	220.6	29.7	3.63	196	>sp|P07911|UROM_HUMAN Uromodulin OS=Homo sapiens OX=9606 GN=UMOD PE=1 SV=1	1	20230315_zy_umod_t-before.9840.9840.3	controllerType=0 controllerNumber=1 scan=9840	36.513
R.C[+57.021]NTAAPMWLN[+2157.783]GTHPSSDEGIVSR.K	HexNAc(6)Hex(4)NeuAc(1)	C[+57], N[+2158]	1165.24	4	4657.92	4657.92	0	1.4	223	Specific	359.88	359.88	48.9	4	196	>sp|P07911|UROM_HUMAN Uromodulin OS=Homo sapiens OX=9606 GN=UMOD PE=1 SV=1	1	20230315_zy_umod_t-before.9925.9925.4	controllerType=0 controllerNumber=1 scan=9925	36.8369
R.C[+57.021]NTAAPMWLN[+2157.783]GTHPSSDEGIVSR.K	HexNAc(6)Hex(4)NeuAc(1)	C[+57], N[+2158]	1165.24	4	4657.92	4657.92	0	0.4	223	Specific	382.01	382.01	37.05	6.95	196	>sp|P07911|UROM_HUMAN Uromodulin OS=Homo sapiens OX=9606 GN=UMOD PE=1 SV=1	1	20230315_zy_umod_t-before.9919.9919.4	controllerType=0 controllerNumber=1 scan=9919	36.8204
R.C[+57.021]NTAAPMWLN[+2157.783]GTHPSSDEGIVSR.K	HexNAc(6)Hex(4)NeuAc(1)	C[+57], N[+2158]	1165.23	4	4657.92	4657.92	0	0.1	223	Specific	396.13	396.13	53.83	5.79	196	>sp|P07911|UROM_HUMAN Uromodulin OS=Homo sapiens OX=9606 GN=UMOD PE=1 SV=1	1	20230315_zy_umod_t-before.9815.9815.4	controllerType=0 controllerNumber=1 scan=9815	36.4144
R.C[+57.021]NTAAPMWLN[+2157.783]GTHPSSDEGIVSR.K	HexNAc(6)Hex(4)NeuAc(1)	C[+57], N[+2158]	1165.24	4	4657.93	4657.92	0	1.8	223	Specific	451.34	451.34	70.46	6.84	196	>sp|P07911|UROM_HUMAN Uromodulin OS=Homo sapiens OX=9606 GN=UMOD PE=1 SV=1	1	20230315_zy_umod_t-before.9834.9834.4	controllerType=0 controllerNumber=1 scan=9834	36.4849
R.C[+57.021]NTAAPM[+15.995]WLN[+2756.989]GTHPSSDEGIVSR.K	HexNAc(6)Hex(5)Fuc(1)NeuAc(2)	C[+57], M[+16], N[+2757]	1319.04	4	5273.13	5273.12	0	2.7	223	Specific	278.44	278.44	197.22	4.36	196	>sp|P07911|UROM_HUMAN Uromodulin OS=Homo sapiens OX=9606 GN=UMOD PE=1 SV=1	1	20230315_zy_umod_t-before.14406.14406.4	controllerType=0 controllerNumber=1 scan=14406	53.8444
R.C[+57.021]NTAAPM[+15.995]WLN[+2756.989]GTHPSSDEGIVSR.K	HexNAc(6)Hex(5)Fuc(1)NeuAc(2)	C[+57], M[+16], N[+2757]	1318.78	4	5272.12	5273.12	-1	0.3	223	Specific	335.24	335.24	156.67	5.56	196	>sp|P07911|UROM_HUMAN Uromodulin OS=Homo sapiens OX=9606 GN=UMOD PE=1 SV=1	1	20230315_zy_umod_t-before.14306.14306.4	controllerType=0 controllerNumber=1 scan=14306	53.4664
R.C[+57.021]NTAAPMWLN[+2756.989]GTHPSSDEGIVSR.K	HexNAc(6)Hex(5)Fuc(1)NeuAc(2)	C[+57], N[+2757]	1314.78	4	5256.11	5257.12	-1	-1	223	Specific	393.98	393.98	393.98	6.95	196	>sp|P07911|UROM_HUMAN Uromodulin OS=Homo sapiens OX=9606 GN=UMOD PE=1 SV=1	1	20230315_zy_umod_t-before.16771.16771.4	controllerType=0 controllerNumber=1 scan=16771	62.2315
R.C[+57.021]NTAAPM[+15.995]WLN[+2756.989]GTHPSSDEGIVSR.K	HexNAc(6)Hex(5)Fuc(1)NeuAc(2)	C[+57], M[+16], N[+2757]	1319.04	4	5273.13	5273.12	0	1.9	223	Specific	494.24	494.24	173.45	6.85	196	>sp|P07911|UROM_HUMAN Uromodulin OS=Homo sapiens OX=9606 GN=UMOD PE=1 SV=1	1	20230315_zy_umod_t-before.14279.14279.4	controllerType=0 controllerNumber=1 scan=14279	53.366
R.C[+57.021]NTAAPM[+15.995]WLN[+2756.989]GTHPSSDEGIVSR.K	HexNAc(6)Hex(5)Fuc(1)NeuAc(2)	C[+57], M[+16], N[+2757]	1318.78	4	5272.12	5273.12	-1	0.3	223	Specific	532.79	532.79	210.22	7.45	196	>sp|P07911|UROM_HUMAN Uromodulin OS=Homo sapiens OX=9606 GN=UMOD PE=1 SV=1	1	20230315_zy_umod_t-before.14300.14300.4	controllerType=0 controllerNumber=1 scan=14300	53.4487
R.C[+57.021]NTAAPM[+15.995]WLN[+3048.084]GTHPSSDEGIVSR.K	HexNAc(6)Hex(5)Fuc(1)NeuAc(3)	C[+57], M[+16], N[+3048]	1391.81	4	5564.21	5564.21	0	-0.1	223	Specific	204.64	204.64	204.64	2.95	196	>sp|P07911|UROM_HUMAN Uromodulin OS=Homo sapiens OX=9606 GN=UMOD PE=1 SV=1	1	20230315_zy_umod_t-before.12622.12622.4	controllerType=0 controllerNumber=1 scan=12622	47.0642
R.C[+57.021]NTAAPM[+15.995]WLN[+3048.084]GTHPSSDEGIVSR.K	HexNAc(6)Hex(5)Fuc(1)NeuAc(3)	C[+57], M[+16], N[+3048]	1391.81	4	5564.22	5564.21	0	1	223	Specific	254.77	254.77	254.77	2.78	196	>sp|P07911|UROM_HUMAN Uromodulin OS=Homo sapiens OX=9606 GN=UMOD PE=1 SV=1	1	20230315_zy_umod_t-before.12702.12702.4	controllerType=0 controllerNumber=1 scan=12702	47.3714
R.C[+57.021]NTAAPM[+15.995]WLN[+3048.084]GTHPSSDEGIVSR.K	HexNAc(6)Hex(5)Fuc(1)NeuAc(3)	C[+57], M[+16], N[+3048]	1391.55	4	5563.2	5564.21	-1	-2.6	223	Specific	263.11	263.11	263.11	5.07	196	>sp|P07911|UROM_HUMAN Uromodulin OS=Homo sapiens OX=9606 GN=UMOD PE=1 SV=1	1	20230315_zy_umod_t-before.16010.16010.4	controllerType=0 controllerNumber=1 scan=16010	59.4849
R.C[+57.021]NTAAPM[+15.995]WLN[+3048.084]GTHPSSDEGIVSR.K	HexNAc(6)Hex(5)Fuc(1)NeuAc(3)	C[+57], M[+16], N[+3048]	1391.81	4	5564.23	5564.21	0	2.3	223	Specific	325.4	325.4	325.4	5.14	196	>sp|P07911|UROM_HUMAN Uromodulin OS=Homo sapiens OX=9606 GN=UMOD PE=1 SV=1	1	20230315_zy_umod_t-before.12682.12682.4	controllerType=0 controllerNumber=1 scan=12682	47.2899
R.C[+57.021]NTAAPM[+15.995]WLN[+2190.793]GTHPSSDEGIVSR.K	HexNAc(6)Hex(6)	C[+57], M[+16], N[+2191]	1569.98	3	4707.93	4706.92	1	0.2	223	Specific	345.15	345.15	345.15	6.14	196	>sp|P07911|UROM_HUMAN Uromodulin OS=Homo sapiens OX=9606 GN=UMOD PE=1 SV=1	1	20230315_zy_umod_t-before.17309.17309.3	controllerType=0 controllerNumber=1 scan=17309	64.1851
R.C[+57.021]NTAAPM[+15.995]WLN[+2190.793]GTHPSSDEGIVSR.K	HexNAc(6)Hex(6)	C[+57], M[+16], N[+2191]	1569.98	3	4707.92	4706.92	1	-1.4	223	Specific	358.17	358.17	358.17	6.14	196	>sp|P07911|UROM_HUMAN Uromodulin OS=Homo sapiens OX=9606 GN=UMOD PE=1 SV=1	1	20230315_zy_umod_t-before.17293.17293.3	controllerType=0 controllerNumber=1 scan=17293	64.1304
R.C[+57.021]NTAAPMWLN[+2627.947]GTHPSSDEGIVSR.K	HexNAc(6)Hex(6)Fuc(1)NeuAc(1)	C[+57], N[+2628]	1282.52	4	5127.06	5128.08	-1	-2.6	223	Specific	320.93	320.93	320.93	5.56	196	>sp|P07911|UROM_HUMAN Uromodulin OS=Homo sapiens OX=9606 GN=UMOD PE=1 SV=1	1	20230315_zy_umod_t-before.14949.14949.4	controllerType=0 controllerNumber=1 scan=14949	55.8015
R.C[+57.021]NTAAPMWLN[+2627.947]GTHPSSDEGIVSR.K	HexNAc(6)Hex(6)Fuc(1)NeuAc(1)	C[+57], N[+2628]	1282.52	4	5127.07	5128.08	-1	-1.1	223	Specific	343.99	335.31	335.31	5.56	196	>sp|P07911|UROM_HUMAN Uromodulin OS=Homo sapiens OX=9606 GN=UMOD PE=1 SV=1	1	20230315_zy_umod_t-before.14830.14830.4	controllerType=0 controllerNumber=1 scan=14830	55.3643
R.C[+57.021]NTAAPMWLN[+2627.947]GTHPSSDEGIVSR.K	HexNAc(6)Hex(6)Fuc(1)NeuAc(1)	C[+57], N[+2628]	1282.52	4	5127.07	5128.08	-1	-1.6	223	Specific	391.22	391.22	391.22	6.95	196	>sp|P07911|UROM_HUMAN Uromodulin OS=Homo sapiens OX=9606 GN=UMOD PE=1 SV=1	1	20230315_zy_umod_t-before.14835.14835.4	controllerType=0 controllerNumber=1 scan=14835	55.3791
R.C[+57.021]NTAAPMWLN[+2627.947]GTHPSSDEGIVSR.K	HexNAc(6)Hex(6)Fuc(1)NeuAc(1)	C[+57], N[+2628]	1282.52	4	5127.07	5128.08	-1	-2.3	223	Specific	420.63	420.63	420.63	7.04	196	>sp|P07911|UROM_HUMAN Uromodulin OS=Homo sapiens OX=9606 GN=UMOD PE=1 SV=1	1	20230315_zy_umod_t-before.14702.14702.4	controllerType=0 controllerNumber=1 scan=14702	54.9023
R.C[+57.021]NTAAPMWLN[+2627.947]GTHPSSDEGIVSR.K	HexNAc(6)Hex(6)Fuc(1)NeuAc(1)	C[+57], N[+2628]	1282.77	4	5128.06	5128.08	0	-3.6	223	Specific	448.59	448.59	448.59	7.2	196	>sp|P07911|UROM_HUMAN Uromodulin OS=Homo sapiens OX=9606 GN=UMOD PE=1 SV=1	1	20230315_zy_umod_t-before.14791.14791.4	controllerType=0 controllerNumber=1 scan=14791	55.2207
R.C[+57.021]NTAAPMWLN[+2919.042]GTHPSSDEGIVSR.K	HexNAc(6)Hex(6)Fuc(1)NeuAc(2)	C[+57], N[+2919]	1355.3	4	5418.16	5419.18	-1	-2.2	223	Specific	228.36	228.36	228.36	4.92	196	>sp|P07911|UROM_HUMAN Uromodulin OS=Homo sapiens OX=9606 GN=UMOD PE=1 SV=1	1	20230315_zy_umod_t-before.13082.13082.4	controllerType=0 controllerNumber=1 scan=13082	48.8266
R.C[+57.021]NTAAPMWLN[+2919.042]GTHPSSDEGIVSR.K	HexNAc(6)Hex(6)Fuc(1)NeuAc(2)	C[+57], N[+2919]	1355.3	4	5418.17	5419.18	-1	-1.1	223	Specific	234.44	234.44	234.44	3.76	196	>sp|P07911|UROM_HUMAN Uromodulin OS=Homo sapiens OX=9606 GN=UMOD PE=1 SV=1	1	20230315_zy_umod_t-before.13174.13174.4	controllerType=0 controllerNumber=1 scan=13174	49.1793
R.C[+57.021]NTAAPMWLN[+2919.042]GTHPSSDEGIVSR.K	HexNAc(6)Hex(6)Fuc(1)NeuAc(2)	C[+57], N[+2919]	1355.3	4	5418.16	5419.18	-1	-2.1	223	Specific	290.03	290.03	290.03	3.93	196	>sp|P07911|UROM_HUMAN Uromodulin OS=Homo sapiens OX=9606 GN=UMOD PE=1 SV=1	1	20230315_zy_umod_t-before.13088.13088.4	controllerType=0 controllerNumber=1 scan=13088	48.8431
R.C[+57.021]NTAAPMWLN[+2919.042]GTHPSSDEGIVSR.K	HexNAc(6)Hex(6)Fuc(1)NeuAc(2)	C[+57], N[+2919]	1355.3	4	5418.17	5419.18	-1	-0.4	223	Specific	360.77	360.77	360.77	5.67	196	>sp|P07911|UROM_HUMAN Uromodulin OS=Homo sapiens OX=9606 GN=UMOD PE=1 SV=1	1	20230315_zy_umod_t-before.16373.16373.4	controllerType=0 controllerNumber=1 scan=16373	60.825
R.C[+57.021]NTAAPMWLN[+2919.042]GTHPSSDEGIVSR.K	HexNAc(6)Hex(6)Fuc(1)NeuAc(2)	C[+57], N[+2919]	1355.3	4	5418.17	5419.18	-1	-0.3	223	Specific	367.21	367.21	367.21	5.67	196	>sp|P07911|UROM_HUMAN Uromodulin OS=Homo sapiens OX=9606 GN=UMOD PE=1 SV=1	1	20230315_zy_umod_t-before.16366.16366.4	controllerType=0 controllerNumber=1 scan=16366	60.8033
R.C[+57.021]NTAAPMWLN[+2919.042]GTHPSSDEGIVSR.K	HexNAc(6)Hex(6)Fuc(1)NeuAc(2)	C[+57], N[+2919]	1355.3	4	5418.17	5419.18	-1	-0.7	223	Specific	389.97	389.97	389.97	6.95	196	>sp|P07911|UROM_HUMAN Uromodulin OS=Homo sapiens OX=9606 GN=UMOD PE=1 SV=1	1	20230315_zy_umod_t-before.16391.16391.4	controllerType=0 controllerNumber=1 scan=16391	60.8939
R.C[+57.021]NTAAPMWLN[+2919.042]GTHPSSDEGIVSR.K	HexNAc(6)Hex(6)Fuc(1)NeuAc(2)	C[+57], N[+2919]	1355.3	4	5418.17	5419.18	-1	-0.9	223	Specific	454.86	454.86	454.86	7.2	196	>sp|P07911|UROM_HUMAN Uromodulin OS=Homo sapiens OX=9606 GN=UMOD PE=1 SV=1	1	20230315_zy_umod_t-before.13180.13180.4	controllerType=0 controllerNumber=1 scan=13180	49.195
R.C[+57.021]NTAAPMWLN[+3081.095]GTHPSSDEGIVSR.K	HexNAc(6)Hex(7)Fuc(1)NeuAc(2)	C[+57], N[+3081]	1396.31	4	5582.23	5581.23	1	-0.1	223	Specific	444.61	444.61	26.27	7.2	196	>sp|P07911|UROM_HUMAN Uromodulin OS=Homo sapiens OX=9606 GN=UMOD PE=1 SV=1	1	20230315_zy_umod_t-before.16333.16333.4	controllerType=0 controllerNumber=1 scan=16333	60.6847
R.C[+57.021]NTAAPM[+15.995]WLN[+3663.286]GTHPSSDEGIVSR.K	HexNAc(6)Hex(7)Fuc(1)NeuAc(4)	C[+57], M[+16], N[+3663]	1545.61	4	6179.43	6179.41	0	2.9	223	Specific	456.13	456.13	456.13	6.49	196	>sp|P07911|UROM_HUMAN Uromodulin OS=Homo sapiens OX=9606 GN=UMOD PE=1 SV=1	1	20230315_zy_umod_t-before.17108.17108.4	controllerType=0 controllerNumber=1 scan=17108	63.4741
R.C[+57.021]NTAAPM[+15.995]WLN[+3663.286]GTHPSSDEGIVSR.K	HexNAc(6)Hex(7)Fuc(1)NeuAc(4)	C[+57], M[+16], N[+3663]	1545.61	4	6179.42	6179.41	0	0.7	223	Specific	488.87	488.87	488.87	7.22	196	>sp|P07911|UROM_HUMAN Uromodulin OS=Homo sapiens OX=9606 GN=UMOD PE=1 SV=1	1	20230315_zy_umod_t-before.17021.17021.4	controllerType=0 controllerNumber=1 scan=17021	63.1517
R.C[+57.021]NTAAPMWLN[+3663.286]GTHPSSDEGIVSR.K	HexNAc(6)Hex(7)Fuc(1)NeuAc(4)	C[+57], N[+3663]	1541.61	4	6163.43	6163.42	0	1.3	223	Specific	583.11	583.11	583.11	7.93	196	>sp|P07911|UROM_HUMAN Uromodulin OS=Homo sapiens OX=9606 GN=UMOD PE=1 SV=1	1	20230315_zy_umod_t-before.18855.18855.4	controllerType=0 controllerNumber=1 scan=18855	69.5676
R.C[+57.021]NTAAPM[+15.995]WLN[+3663.286]GTHPSSDEGIVSR.K	HexNAc(6)Hex(7)Fuc(1)NeuAc(4)	C[+57], M[+16], N[+3663]	1545.61	4	6179.43	6179.41	0	2.7	223	Specific	634.86	634.86	634.86	8.76	196	>sp|P07911|UROM_HUMAN Uromodulin OS=Homo sapiens OX=9606 GN=UMOD PE=1 SV=1	1	20230315_zy_umod_t-before.17120.17120.4	controllerType=0 controllerNumber=1 scan=17120	63.5173
R.C[+57.021]NTAAPMWLN[+2643.941]GTHPSSDEGIVSR.K	HexNAc(6)Hex(7)NeuAc(1)	C[+57], N[+2644]	1286.53	4	5143.08	5144.08	-1	1.6	223	Specific	216.42	216.42	86.24	4.35	196	>sp|P07911|UROM_HUMAN Uromodulin OS=Homo sapiens OX=9606 GN=UMOD PE=1 SV=1	1	20230315_zy_umod_t-before.14843.14843.4	controllerType=0 controllerNumber=1 scan=14843	55.4131
R.C[+57.021]NTAAPMWLN[+2643.941]GTHPSSDEGIVSR.K	HexNAc(6)Hex(7)NeuAc(1)	C[+57], N[+2644]	1286.53	4	5143.08	5144.08	-1	2.1	223	Specific	260.83	260.83	172.85	4.66	196	>sp|P07911|UROM_HUMAN Uromodulin OS=Homo sapiens OX=9606 GN=UMOD PE=1 SV=1	1	20230315_zy_umod_t-before.14901.14901.4	controllerType=0 controllerNumber=1 scan=14901	55.6286
R.C[+57.021]NTAAPM[+15.995]WLN[+2643.941]GTHPSSDEGIVSR.K	HexNAc(6)Hex(7)NeuAc(1)	C[+57], M[+16], N[+2644]	1290.78	4	5160.09	5160.07	0	2.8	223	Specific	330.84	330.84	330.84	4.85	196	>sp|P07911|UROM_HUMAN Uromodulin OS=Homo sapiens OX=9606 GN=UMOD PE=1 SV=1	1	20230315_zy_umod_t-before.12833.12833.4	controllerType=0 controllerNumber=1 scan=12833	47.8773
R.C[+57.021]NTAAPMWLN[+2643.941]GTHPSSDEGIVSR.K	HexNAc(6)Hex(7)NeuAc(1)	C[+57], N[+2644]	1286.77	4	5144.07	5144.08	0	-0.9	223	Specific	595.95	595.95	173.9	8.47	196	>sp|P07911|UROM_HUMAN Uromodulin OS=Homo sapiens OX=9606 GN=UMOD PE=1 SV=1	1	20230315_zy_umod_t-before.14779.14779.4	controllerType=0 controllerNumber=1 scan=14779	55.1798
R.C[+57.021]NTAAPMWLN[+2643.941]GTHPSSDEGIVSR.K	HexNAc(6)Hex(7)NeuAc(1)	C[+57], N[+2644]	1286.77	4	5144.08	5144.08	0	0.3	223	Specific	717.66	717.66	254.4	11.47	196	>sp|P07911|UROM_HUMAN Uromodulin OS=Homo sapiens OX=9606 GN=UMOD PE=1 SV=1	1	20230315_zy_umod_t-before.14771.14771.4	controllerType=0 controllerNumber=1 scan=14771	55.1535
R.C[+57.021]NTAAPM[+15.995]WLN[+2935.037]GTHPSSDEGIVSR.K	HexNAc(6)Hex(7)NeuAc(2)	C[+57], M[+16], N[+2935]	1363.3	4	5450.18	5451.17	-1	2.2	223	Specific	219.77	219.77	219.77	4.3	196	>sp|P07911|UROM_HUMAN Uromodulin OS=Homo sapiens OX=9606 GN=UMOD PE=1 SV=1	1	20230315_zy_umod_t-before.14323.14323.4	controllerType=0 controllerNumber=1 scan=14323	53.5341
R.C[+57.021]NTAAPM[+15.995]WLN[+2935.037]GTHPSSDEGIVSR.K	HexNAc(6)Hex(7)NeuAc(2)	C[+57], M[+16], N[+2935]	1363.3	4	5450.17	5451.17	-1	1	223	Specific	234.93	234.93	234.93	4.38	196	>sp|P07911|UROM_HUMAN Uromodulin OS=Homo sapiens OX=9606 GN=UMOD PE=1 SV=1	1	20230315_zy_umod_t-before.14350.14350.4	controllerType=0 controllerNumber=1 scan=14350	53.6375
R.C[+57.021]NTAAPM[+15.995]WLN[+2935.037]GTHPSSDEGIVSR.K	HexNAc(6)Hex(7)NeuAc(2)	C[+57], M[+16], N[+2935]	1363.29	4	5450.16	5451.17	-1	-0.9	223	Specific	347.84	347.84	347.84	5.7	196	>sp|P07911|UROM_HUMAN Uromodulin OS=Homo sapiens OX=9606 GN=UMOD PE=1 SV=1	1	20230315_zy_umod_t-before.14343.14343.4	controllerType=0 controllerNumber=1 scan=14343	53.6083
R.C[+57.021]NTAAPMWLN[+2935.037]GTHPSSDEGIVSR.K	HexNAc(6)Hex(7)NeuAc(2)	C[+57], N[+2935]	1359.55	4	5435.19	5435.17	0	4.4	223	Specific	362.03	311.06	176.7	4.2	196	>sp|P07911|UROM_HUMAN Uromodulin OS=Homo sapiens OX=9606 GN=UMOD PE=1 SV=1	1	20230315_zy_umod_t-before.16741.16741.4	controllerType=0 controllerNumber=1 scan=16741	62.1374
R.C[+57.021]NTAAPM[+15.995]WLN[+2935.037]GTHPSSDEGIVSR.K	HexNAc(6)Hex(7)NeuAc(2)	C[+57], M[+16], N[+2935]	1363.55	4	5451.18	5451.17	0	3.1	223	Specific	433.69	433.69	128.84	6.33	196	>sp|P07911|UROM_HUMAN Uromodulin OS=Homo sapiens OX=9606 GN=UMOD PE=1 SV=1	1	20230315_zy_umod_t-before.14459.14459.4	controllerType=0 controllerNumber=1 scan=14459	54.0322
R.C[+57.021]NTAAPMWLN[+2935.037]GTHPSSDEGIVSR.K	HexNAc(6)Hex(7)NeuAc(2)	C[+57], N[+2935]	1359.8	4	5436.18	5435.17	1	0.1	223	Specific	462.98	462.98	211.37	7.2	196	>sp|P07911|UROM_HUMAN Uromodulin OS=Homo sapiens OX=9606 GN=UMOD PE=1 SV=1	1	20230315_zy_umod_t-before.16644.16644.4	controllerType=0 controllerNumber=1 scan=16644	61.7968
R.C[+57.021]NTAAPMWLN[+2935.037]GTHPSSDEGIVSR.K	HexNAc(6)Hex(7)NeuAc(2)	C[+57], N[+2935]	1359.3	4	5434.17	5435.17	-1	0.7	223	Specific	498.48	498.48	206.14	7.22	196	>sp|P07911|UROM_HUMAN Uromodulin OS=Homo sapiens OX=9606 GN=UMOD PE=1 SV=1	1	20230315_zy_umod_t-before.16619.16619.4	controllerType=0 controllerNumber=1 scan=16619	61.7016
R.C[+57.021]NTAAPMWLN[+2935.037]GTHPSSDEGIVSR.K	HexNAc(6)Hex(7)NeuAc(2)	C[+57], N[+2935]	1359.55	4	5435.19	5435.17	0	2.6	223	Specific	543.77	543.77	247.8	7.03	196	>sp|P07911|UROM_HUMAN Uromodulin OS=Homo sapiens OX=9606 GN=UMOD PE=1 SV=1	1	20230315_zy_umod_t-before.16608.16608.4	controllerType=0 controllerNumber=1 scan=16608	61.6703
R.C[+57.021]NTAAPMWLN[+2935.037]GTHPSSDEGIVSR.K	HexNAc(6)Hex(7)NeuAc(2)	C[+57], N[+2935]	1359.55	4	5435.18	5435.17	0	1.5	223	Specific	619.53	619.53	292.48	9.11	196	>sp|P07911|UROM_HUMAN Uromodulin OS=Homo sapiens OX=9606 GN=UMOD PE=1 SV=1	1	20230315_zy_umod_t-before.16614.16614.4	controllerType=0 controllerNumber=1 scan=16614	61.6892
R.C[+57.021]NTAAPM[+15.995]WLN[+3226.132]GTHPSSDEGIVSR.K	HexNAc(6)Hex(7)NeuAc(3)	C[+57], M[+16], N[+3226]	1436.07	4	5741.27	5742.26	-1	2.4	223	Specific	328.82	328.82	328.82	5.14	196	>sp|P07911|UROM_HUMAN Uromodulin OS=Homo sapiens OX=9606 GN=UMOD PE=1 SV=1	1	20230315_zy_umod_t-before.16256.16256.4	controllerType=0 controllerNumber=1 scan=16256	60.3964
R.C[+57.021]NTAAPMWLN[+3226.132]GTHPSSDEGIVSR.K	HexNAc(6)Hex(7)NeuAc(3)	C[+57], N[+3226]	1432.07	4	5725.27	5726.27	-1	0.8	223	Specific	349.16	349.16	163.38	5.7	196	>sp|P07911|UROM_HUMAN Uromodulin OS=Homo sapiens OX=9606 GN=UMOD PE=1 SV=1	1	20230315_zy_umod_t-before.18144.18144.4	controllerType=0 controllerNumber=1 scan=18144	67.1497
R.C[+57.021]NTAAPM[+15.995]WLN[+3226.132]GTHPSSDEGIVSR.K	HexNAc(6)Hex(7)NeuAc(3)	C[+57], M[+16], N[+3226]	1436.33	4	5742.29	5742.26	0	4.1	223	Specific	374.36	374.36	374.36	5.71	196	>sp|P07911|UROM_HUMAN Uromodulin OS=Homo sapiens OX=9606 GN=UMOD PE=1 SV=1	1	20230315_zy_umod_t-before.16247.16247.4	controllerType=0 controllerNumber=1 scan=16247	60.3635
R.C[+57.021]NTAAPM[+15.995]WLN[+3226.132]GTHPSSDEGIVSR.K	HexNAc(6)Hex(7)NeuAc(3)	C[+57], M[+16], N[+3226]	1436.58	4	5743.29	5742.26	1	4.8	223	Specific	443.86	443.86	443.86	6.04	196	>sp|P07911|UROM_HUMAN Uromodulin OS=Homo sapiens OX=9606 GN=UMOD PE=1 SV=1	1	20230315_zy_umod_t-before.16095.16095.4	controllerType=0 controllerNumber=1 scan=16095	59.798
R.C[+57.021]NTAAPM[+15.995]WLN[+3226.132]GTHPSSDEGIVSR.K	HexNAc(6)Hex(7)NeuAc(3)	C[+57], M[+16], N[+3226]	1436.32	4	5742.26	5742.26	0	0.1	223	Specific	492.81	492.81	492.81	7.22	196	>sp|P07911|UROM_HUMAN Uromodulin OS=Homo sapiens OX=9606 GN=UMOD PE=1 SV=1	1	20230315_zy_umod_t-before.16325.16325.4	controllerType=0 controllerNumber=1 scan=16325	60.6539
R.C[+57.021]NTAAPMWLN[+3226.132]GTHPSSDEGIVSR.K	HexNAc(6)Hex(7)NeuAc(3)	C[+57], N[+3226]	1432.08	4	5725.29	5726.27	-1	4.1	223	Specific	622.7	622.7	362.39	8.23	196	>sp|P07911|UROM_HUMAN Uromodulin OS=Homo sapiens OX=9606 GN=UMOD PE=1 SV=1	1	20230315_zy_umod_t-before.18121.18121.4	controllerType=0 controllerNumber=1 scan=18121	67.0706
R.C[+57.021]NTAAPMWLN[+3226.132]GTHPSSDEGIVSR.K	HexNAc(6)Hex(7)NeuAc(3)	C[+57], N[+3226]	1432.07	4	5725.28	5726.27	-1	2.2	223	Specific	624.51	624.51	215.9	9.06	196	>sp|P07911|UROM_HUMAN Uromodulin OS=Homo sapiens OX=9606 GN=UMOD PE=1 SV=1	1	20230315_zy_umod_t-before.18233.18233.4	controllerType=0 controllerNumber=1 scan=18233	67.4552
R.C[+57.021]NTAAPMWLN[+3226.132]GTHPSSDEGIVSR.K	HexNAc(6)Hex(7)NeuAc(3)	C[+57], N[+3226]	1432.57	4	5727.27	5726.27	1	0.8	223	Specific	700.98	700.98	334.94	11.47	196	>sp|P07911|UROM_HUMAN Uromodulin OS=Homo sapiens OX=9606 GN=UMOD PE=1 SV=1	1	20230315_zy_umod_t-before.18225.18225.4	controllerType=0 controllerNumber=1 scan=18225	67.4261
R.C[+57.021]NTAAPM[+15.995]WLN[+3517.228]GTHPSSDEGIVSR.K	HexNAc(6)Hex(7)NeuAc(4)	C[+57], M[+16], N[+3517]	1509.1	4	6033.36	6033.36	0	1.1	223	Specific	220.83	220.83	220.83	4.17	196	>sp|P07911|UROM_HUMAN Uromodulin OS=Homo sapiens OX=9606 GN=UMOD PE=1 SV=1	1	20230315_zy_umod_t-before.19432.19432.4	controllerType=0 controllerNumber=1 scan=19432	71.51
R.C[+57.021]NTAAPMWLN[+3517.228]GTHPSSDEGIVSR.K	HexNAc(6)Hex(7)NeuAc(4)	C[+57], N[+3517]	1504.84	4	6016.34	6017.36	-1	-3.4	223	Specific	241.4	241.4	241.4	4.97	196	>sp|P07911|UROM_HUMAN Uromodulin OS=Homo sapiens OX=9606 GN=UMOD PE=1 SV=1	1	20230315_zy_umod_t-before.19466.19466.4	controllerType=0 controllerNumber=1 scan=19466	71.6262
R.C[+57.021]NTAAPMWLN[+3517.228]GTHPSSDEGIVSR.K	HexNAc(6)Hex(7)NeuAc(4)	C[+57], N[+3517]	1505.09	4	6017.36	6017.36	0	-0.8	223	Specific	257.22	257.22	257.22	5.07	196	>sp|P07911|UROM_HUMAN Uromodulin OS=Homo sapiens OX=9606 GN=UMOD PE=1 SV=1	1	20230315_zy_umod_t-before.18976.18976.4	controllerType=0 controllerNumber=1 scan=18976	69.955
R.C[+57.021]NTAAPM[+15.995]WLN[+3517.228]GTHPSSDEGIVSR.K	HexNAc(6)Hex(7)NeuAc(4)	C[+57], M[+16], N[+3517]	1509.35	4	6034.37	6033.36	1	1.2	223	Specific	272.61	272.61	272.61	4.53	196	>sp|P07911|UROM_HUMAN Uromodulin OS=Homo sapiens OX=9606 GN=UMOD PE=1 SV=1	1	20230315_zy_umod_t-before.17838.17838.4	controllerType=0 controllerNumber=1 scan=17838	66.0834
R.C[+57.021]NTAAPMWLN[+3517.228]GTHPSSDEGIVSR.K	HexNAc(6)Hex(7)NeuAc(4)	C[+57], N[+3517]	1505.09	4	6017.34	6017.36	0	-2.9	223	Specific	352.95	352.95	352.95	5.7	196	>sp|P07911|UROM_HUMAN Uromodulin OS=Homo sapiens OX=9606 GN=UMOD PE=1 SV=1	1	20230315_zy_umod_t-before.19413.19413.4	controllerType=0 controllerNumber=1 scan=19413	71.4425
R.C[+57.021]NTAAPM[+15.995]WLN[+3517.228]GTHPSSDEGIVSR.K	HexNAc(6)Hex(7)NeuAc(4)	C[+57], M[+16], N[+3517]	1207.48	5	6033.36	6033.36	0	0	223	Specific	361.21	361.21	361.21	5.67	196	>sp|P07911|UROM_HUMAN Uromodulin OS=Homo sapiens OX=9606 GN=UMOD PE=1 SV=1	1	20230315_zy_umod_t-before.17682.17682.5	controllerType=0 controllerNumber=1 scan=17682	65.5194
R.C[+57.021]NTAAPM[+15.995]WLN[+3517.228]GTHPSSDEGIVSR.K	HexNAc(6)Hex(7)NeuAc(4)	C[+57], M[+16], N[+3517]	1509.35	4	6034.39	6033.36	1	5.3	223	Specific	401.4	401.4	401.4	5.5	196	>sp|P07911|UROM_HUMAN Uromodulin OS=Homo sapiens OX=9606 GN=UMOD PE=1 SV=1	1	20230315_zy_umod_t-before.19016.19016.4	controllerType=0 controllerNumber=1 scan=19016	70.0715
R.C[+57.021]NTAAPM[+15.995]WLN[+3517.228]GTHPSSDEGIVSR.K	HexNAc(6)Hex(7)NeuAc(4)	C[+57], M[+16], N[+3517]	1508.85	4	6032.37	6033.36	-1	3	223	Specific	462.86	462.86	462.86	6.49	196	>sp|P07911|UROM_HUMAN Uromodulin OS=Homo sapiens OX=9606 GN=UMOD PE=1 SV=1	1	20230315_zy_umod_t-before.17754.17754.4	controllerType=0 controllerNumber=1 scan=17754	65.7838
R.C[+57.021]NTAAPM[+15.995]WLN[+3517.228]GTHPSSDEGIVSR.K	HexNAc(6)Hex(7)NeuAc(4)	C[+57], M[+16], N[+3517]	1509.09	4	6033.36	6033.36	0	0.1	223	Specific	485.5	485.5	485.5	7.22	196	>sp|P07911|UROM_HUMAN Uromodulin OS=Homo sapiens OX=9606 GN=UMOD PE=1 SV=1	1	20230315_zy_umod_t-before.17520.17520.4	controllerType=0 controllerNumber=1 scan=17520	64.9165
R.C[+57.021]NTAAPM[+15.995]WLN[+3517.228]GTHPSSDEGIVSR.K	HexNAc(6)Hex(7)NeuAc(4)	C[+57], M[+16], N[+3517]	1509.09	4	6033.36	6033.36	0	-0.2	223	Specific	498.93	498.93	498.93	7.22	196	>sp|P07911|UROM_HUMAN Uromodulin OS=Homo sapiens OX=9606 GN=UMOD PE=1 SV=1	1	20230315_zy_umod_t-before.17823.17823.4	controllerType=0 controllerNumber=1 scan=17823	66.0334
R.C[+57.021]NTAAPM[+15.995]WLN[+3517.228]GTHPSSDEGIVSR.K	HexNAc(6)Hex(7)NeuAc(4)	C[+57], M[+16], N[+3517]	1509.1	4	6033.36	6033.36	0	1.1	223	Specific	655.96	655.96	655.96	9.93	196	>sp|P07911|UROM_HUMAN Uromodulin OS=Homo sapiens OX=9606 GN=UMOD PE=1 SV=1	1	20230315_zy_umod_t-before.17680.17680.4	controllerType=0 controllerNumber=1 scan=17680	65.5137
R.C[+57.021]NTAAPMWLN[+1907.714]GTHPSSDEGIVSR.K	HexNAc(7)Hex(3)	C[+57], N[+1908]	1102.72	4	4407.86	4407.85	0	2.8	223	Specific	243.1	243.1	243.1	2.53	196	>sp|P07911|UROM_HUMAN Uromodulin OS=Homo sapiens OX=9606 GN=UMOD PE=1 SV=1	1	20230315_zy_umod_t-before.8593.8593.4	controllerType=0 controllerNumber=1 scan=8593	31.7297
R.C[+57.021]NTAAPMWLN[+1907.714]GTHPSSDEGIVSR.K	HexNAc(7)Hex(3)	C[+57], N[+1908]	1102.72	4	4407.86	4407.85	0	1.8	223	Specific	262.54	262.54	262.54	3.55	196	>sp|P07911|UROM_HUMAN Uromodulin OS=Homo sapiens OX=9606 GN=UMOD PE=1 SV=1	1	20230315_zy_umod_t-before.8579.8579.4	controllerType=0 controllerNumber=1 scan=8579	31.6765
R.C[+57.021]NTAAPMWLN[+2053.772]GTHPSSDEGIVSR.K	HexNAc(7)Hex(3)Fuc(1)	C[+57], N[+2054]	1138.98	4	4552.89	4553.91	-1	-1.9	223	Specific	315.74	315.74	315.74	5.26	196	>sp|P07911|UROM_HUMAN Uromodulin OS=Homo sapiens OX=9606 GN=UMOD PE=1 SV=1	1	20230315_zy_umod_t-before.10186.10186.4	controllerType=0 controllerNumber=1 scan=10186	37.8437
R.C[+57.021]NTAAPMWLN[+2053.772]GTHPSSDEGIVSR.K	HexNAc(7)Hex(3)Fuc(1)	C[+57], N[+2054]	1138.98	4	4552.89	4553.91	-1	-1.9	223	Specific	404.53	404.53	404.53	5.27	196	>sp|P07911|UROM_HUMAN Uromodulin OS=Homo sapiens OX=9606 GN=UMOD PE=1 SV=1	1	20230315_zy_umod_t-before.10218.10218.4	controllerType=0 controllerNumber=1 scan=10218	37.9612
R.C[+57.021]NTAAPMWLN[+3284.174]GTHPSSDEGIVSR.K	HexNAc(7)Hex(7)Fuc(1)NeuAc(2)	C[+57], N[+3284]	1446.58	4	5783.3	5784.31	-1	-0.4	223	Specific	221.56	221.56	221.56	4.71	196	>sp|P07911|UROM_HUMAN Uromodulin OS=Homo sapiens OX=9606 GN=UMOD PE=1 SV=1	1	20230315_zy_umod_t-before.13016.13016.4	controllerType=0 controllerNumber=1 scan=13016	48.5752
R.C[+57.021]NTAAPMWLN[+3284.174]GTHPSSDEGIVSR.K	HexNAc(7)Hex(7)Fuc(1)NeuAc(2)	C[+57], N[+3284]	1446.58	4	5783.28	5784.31	-1	-3.8	223	Specific	235.41	235.41	235.41	4.92	196	>sp|P07911|UROM_HUMAN Uromodulin OS=Homo sapiens OX=9606 GN=UMOD PE=1 SV=1	1	20230315_zy_umod_t-before.16359.16359.4	controllerType=0 controllerNumber=1 scan=16359	60.7735
R.C[+57.021]NTAAPMWLN[+3575.270]GTHPSSDEGIVSR.K	HexNAc(7)Hex(7)Fuc(1)NeuAc(3)	C[+57], N[+3575]	1519.35	4	6074.39	6075.4	-1	-1.1	223	Specific	229.09	229.09	229.09	4.92	196	>sp|P07911|UROM_HUMAN Uromodulin OS=Homo sapiens OX=9606 GN=UMOD PE=1 SV=1	1	20230315_zy_umod_t-before.14505.14505.4	controllerType=0 controllerNumber=1 scan=14505	54.2131
R.C[+57.021]NTAAPMWLN[+3575.270]GTHPSSDEGIVSR.K	HexNAc(7)Hex(7)Fuc(1)NeuAc(3)	C[+57], N[+3575]	1519.35	4	6074.39	6075.4	-1	-1.4	223	Specific	261.2	261.2	261.2	5.07	196	>sp|P07911|UROM_HUMAN Uromodulin OS=Homo sapiens OX=9606 GN=UMOD PE=1 SV=1	1	20230315_zy_umod_t-before.14339.14339.4	controllerType=0 controllerNumber=1 scan=14339	53.5961
R.C[+57.021]NTAAPMWLN[+3575.270]GTHPSSDEGIVSR.K	HexNAc(7)Hex(7)Fuc(1)NeuAc(3)	C[+57], N[+3575]	1519.35	4	6074.39	6075.4	-1	-1.1	223	Specific	422.2	422.2	422.2	7.04	196	>sp|P07911|UROM_HUMAN Uromodulin OS=Homo sapiens OX=9606 GN=UMOD PE=1 SV=1	1	20230315_zy_umod_t-before.14442.14442.4	controllerType=0 controllerNumber=1 scan=14442	53.9684
R.C[+57.021]NTAAPM[+15.995]WLN[+2110.793]GTHPSSDEGIVSR.K	HexNAc(8)Hex(3)	C[+57], M[+16], N[+2111]	1157.49	4	4626.92	4626.92	0	-0.1	223	Specific	279.92	279.92	279.92	5.07	196	>sp|P07911|UROM_HUMAN Uromodulin OS=Homo sapiens OX=9606 GN=UMOD PE=1 SV=1	1	20230315_zy_umod_t-before.11598.11598.3	controllerType=0 controllerNumber=1 scan=11598	43.2989
R.C[+57.021]NTAAPMWLN[+2110.793]GTHPSSDEGIVSR.K	HexNAc(8)Hex(3)	C[+57], N[+2111]	1537.65	3	4610.93	4610.93	0	1.5	223	Specific	508.46	508.46	508.46	7.29	196	>sp|P07911|UROM_HUMAN Uromodulin OS=Homo sapiens OX=9606 GN=UMOD PE=1 SV=1	1	20230315_zy_umod_t-before.13473.13473.3	controllerType=0 controllerNumber=1 scan=13473	50.3018
R.C[+57.021]NTAAPM[+15.995]WLN[+2110.793]GTHPSSDEGIVSR.K	HexNAc(8)Hex(3)	C[+57], M[+16], N[+2111]	1157.48	4	4626.92	4626.92	0	-1	223	Specific	567.36	567.36	567.36	8.47	196	>sp|P07911|UROM_HUMAN Uromodulin OS=Homo sapiens OX=9606 GN=UMOD PE=1 SV=1	1	20230315_zy_umod_t-before.11649.11649.4	controllerType=0 controllerNumber=1 scan=11649	43.4992
R.C[+57.021]NTAAPMWLN[+2110.793]GTHPSSDEGIVSR.K	HexNAc(8)Hex(3)	C[+57], N[+2111]	1153.49	4	4610.93	4610.93	0	1.4	223	Specific	640.57	640.57	640.57	9.11	196	>sp|P07911|UROM_HUMAN Uromodulin OS=Homo sapiens OX=9606 GN=UMOD PE=1 SV=1	1	20230315_zy_umod_t-before.13477.13477.4	controllerType=0 controllerNumber=1 scan=13477	50.312
R.C[+57.021]NTAAPMWLN[+2110.793]GTHPSSDEGIVSR.K	HexNAc(8)Hex(3)	C[+57], N[+2111]	1537.65	3	4610.94	4610.93	0	2.2	223	Specific	650.1	650.1	650.1	10.5	196	>sp|P07911|UROM_HUMAN Uromodulin OS=Homo sapiens OX=9606 GN=UMOD PE=1 SV=1	1	20230315_zy_umod_t-before.13497.13497.3	controllerType=0 controllerNumber=1 scan=13497	50.3945
R.C[+57.021]NTAAPMWLN[+2110.793]GTHPSSDEGIVSR.K	HexNAc(8)Hex(3)	C[+57], N[+2111]	1153.49	4	4610.94	4610.93	0	2.2	223	Specific	751.63	751.63	751.63	12.06	196	>sp|P07911|UROM_HUMAN Uromodulin OS=Homo sapiens OX=9606 GN=UMOD PE=1 SV=1	1	20230315_zy_umod_t-before.13471.13471.4	controllerType=0 controllerNumber=1 scan=13471	50.2954
R.C[+57.021]NTAAPMWLN[+2256.851]GTHPSSDEGIVSR.K	HexNAc(8)Hex(3)Fuc(1)	C[+57], N[+2257]	1190	4	4757	4756.99	0	2.6	223	Specific	315.19	315.19	315.19	4.55	196	>sp|P07911|UROM_HUMAN Uromodulin OS=Homo sapiens OX=9606 GN=UMOD PE=1 SV=1	1	20230315_zy_umod_t-before.13310.13310.4	controllerType=0 controllerNumber=1 scan=13310	49.6906
R.C[+57.021]NTAAPM[+15.995]WLN[+3165.164]GTHPSSDEGIVSR.K	HexNAc(10)Hex(7)	C[+57], M[+16], N[+3165]	1420.82	4	5680.26	5681.29	-1	-4.4	223	Specific	256.41	256.41	256.41	3.43	367	>sp|P07911|UROM_HUMAN Uromodulin OS=Homo sapiens OX=9606 GN=UMOD PE=1 SV=1	1	20230315_zy_umod_t-after.11345.11345.2	controllerType=0 controllerNumber=1 scan=11345	41.3924
R.C[+57.021]NTAAPM[+15.995]WLN[+3165.164]GTHPSSDEGIVSR.K	HexNAc(10)Hex(7)	C[+57], M[+16], N[+3165]	1420.83	4	5680.3	5681.29	-1	1.3	223	Specific	259.13	259.13	259.13	4.43	367	>sp|P07911|UROM_HUMAN Uromodulin OS=Homo sapiens OX=9606 GN=UMOD PE=1 SV=1	1	20230315_zy_umod_t-after.16786.16786.4	controllerType=0 controllerNumber=1 scan=16786	61.2735
R.C[+57.021]NTAAPMWLN[+2026.687]GTHPSSDEGIVSR.K	HexNAc(2)Hex(10)	C[+57], N[+2027]	1509.95	3	4527.84	4526.82	1	3	223	Specific	215.04	215.04	215.04	2.19	367	>sp|P07911|UROM_HUMAN Uromodulin OS=Homo sapiens OX=9606 GN=UMOD PE=1 SV=1	1	20230315_zy_umod_t-after.9992.9992.3	controllerType=0 controllerNumber=1 scan=9992	36.5131
R.C[+57.021]NTAAPMWLN[+2026.687]GTHPSSDEGIVSR.K	HexNAc(2)Hex(10)	C[+57], N[+2027]	1132.46	4	4526.82	4526.82	0	-0.9	223	Specific	241.98	241.98	241.98	4.92	367	>sp|P07911|UROM_HUMAN Uromodulin OS=Homo sapiens OX=9606 GN=UMOD PE=1 SV=1	1	20230315_zy_umod_t-after.9994.9994.4	controllerType=0 controllerNumber=1 scan=9994	36.5192
R.C[+57.021]NTAAPM[+15.995]WLN[+2026.687]GTHPSSDEGIVSR.K	HexNAc(2)Hex(10)	C[+57], M[+16], N[+2027]	1136.47	4	4542.84	4542.82	0	5.9	223	Specific	242.53	242.53	242.53	3.31	367	>sp|P07911|UROM_HUMAN Uromodulin OS=Homo sapiens OX=9606 GN=UMOD PE=1 SV=1	1	20230315_zy_umod_t-after.18974.18974.4	controllerType=0 controllerNumber=1 scan=18974	68.7397
R.C[+57.021]NTAAPMWLN[+2026.687]GTHPSSDEGIVSR.K	HexNAc(2)Hex(10)	C[+57], N[+2027]	1509.62	3	4526.84	4526.82	0	3.5	223	Specific	272.46	272.46	272.46	2.42	367	>sp|P07911|UROM_HUMAN Uromodulin OS=Homo sapiens OX=9606 GN=UMOD PE=1 SV=1	1	20230315_zy_umod_t-after.20518.20518.3	controllerType=0 controllerNumber=1 scan=20518	73.62
R.C[+57.021]NTAAPMWLN[+2026.687]GTHPSSDEGIVSR.K	HexNAc(2)Hex(10)	C[+57], N[+2027]	1509.62	3	4526.84	4526.82	0	4.4	223	Specific	281.72	281.72	281.72	2.42	367	>sp|P07911|UROM_HUMAN Uromodulin OS=Homo sapiens OX=9606 GN=UMOD PE=1 SV=1	1	20230315_zy_umod_t-after.12798.12798.3	controllerType=0 controllerNumber=1 scan=12798	46.707
R.C[+57.021]NTAAPMWLN[+2026.687]GTHPSSDEGIVSR.K	HexNAc(2)Hex(10)	C[+57], N[+2027]	1509.95	3	4527.84	4526.82	1	3.2	223	Specific	326.77	326.77	326.77	4.33	367	>sp|P07911|UROM_HUMAN Uromodulin OS=Homo sapiens OX=9606 GN=UMOD PE=1 SV=1	1	20230315_zy_umod_t-after.10029.10029.3	controllerType=0 controllerNumber=1 scan=10029	36.6409
R.C[+57.021]NTAAPMWLN[+2026.687]GTHPSSDEGIVSR.K	HexNAc(2)Hex(10)	C[+57], N[+2027]	1509.61	3	4526.81	4526.82	0	-3.5	223	Specific	447.38	447.38	447.38	7.1	367	>sp|P07911|UROM_HUMAN Uromodulin OS=Homo sapiens OX=9606 GN=UMOD PE=1 SV=1	1	20230315_zy_umod_t-after.15717.15717.3	controllerType=0 controllerNumber=1 scan=15717	57.3997
R.C[+57.021]NTAAPMWLN[+2188.740]GTHPSSDEGIVSR.K	HexNAc(2)Hex(11)	C[+57], N[+2189]	1563.63	3	4688.88	4688.87	0	0.8	223	Specific	204.48	204.48	204.48	4.69	367	>sp|P07911|UROM_HUMAN Uromodulin OS=Homo sapiens OX=9606 GN=UMOD PE=1 SV=1	1	20230315_zy_umod_t-after.9613.9613.3	controllerType=0 controllerNumber=1 scan=9613	35.1139
R.C[+57.021]NTAAPMWLN[+2188.740]GTHPSSDEGIVSR.K	HexNAc(2)Hex(11)	C[+57], N[+2189]	1173.23	4	4689.88	4688.87	1	1.4	223	Specific	223.21	223.21	223.21	4.26	367	>sp|P07911|UROM_HUMAN Uromodulin OS=Homo sapiens OX=9606 GN=UMOD PE=1 SV=1	1	20230315_zy_umod_t-after.9723.9723.3	controllerType=0 controllerNumber=1 scan=9723	35.5212
R.C[+57.021]NTAAPM[+15.995]WLN[+2188.740]GTHPSSDEGIVSR.K	HexNAc(2)Hex(11)	C[+57], M[+16], N[+2189]	1176.97	4	4704.87	4704.87	0	0.4	223	Specific	234.69	234.69	234.69	4.82	367	>sp|P07911|UROM_HUMAN Uromodulin OS=Homo sapiens OX=9606 GN=UMOD PE=1 SV=1	1	20230315_zy_umod_t-after.9013.9013.4	controllerType=0 controllerNumber=1 scan=9013	32.8863
R.C[+57.021]NTAAPMWLN[+2188.740]GTHPSSDEGIVSR.K	HexNAc(2)Hex(11)	C[+57], N[+2189]	1172.73	4	4687.88	4688.87	-1	2.5	223	Specific	249.41	249.41	249.41	4.04	367	>sp|P07911|UROM_HUMAN Uromodulin OS=Homo sapiens OX=9606 GN=UMOD PE=1 SV=1	1	20230315_zy_umod_t-after.19851.19851.4	controllerType=0 controllerNumber=1 scan=19851	71.4421
R.C[+57.021]NTAAPM[+15.995]WLN[+2188.740]GTHPSSDEGIVSR.K	HexNAc(2)Hex(11)	C[+57], M[+16], N[+2189]	1177.22	4	4705.88	4704.87	1	0.7	223	Specific	301.3	301.3	301.3	3.73	367	>sp|P07911|UROM_HUMAN Uromodulin OS=Homo sapiens OX=9606 GN=UMOD PE=1 SV=1	1	20230315_zy_umod_t-after.10621.10621.4	controllerType=0 controllerNumber=1 scan=10621	38.7658
R.C[+57.021]NTAAPMWLN[+2188.740]GTHPSSDEGIVSR.K	HexNAc(2)Hex(11)	C[+57], N[+2189]	1563.3	3	4687.89	4688.87	-1	3.8	223	Specific	318.34	318.34	318.34	4.25	367	>sp|P07911|UROM_HUMAN Uromodulin OS=Homo sapiens OX=9606 GN=UMOD PE=1 SV=1	1	20230315_zy_umod_t-after.19901.19901.4	controllerType=0 controllerNumber=1 scan=19901	71.5913
R.C[+57.021]NTAAPMWLN[+2188.740]GTHPSSDEGIVSR.K	HexNAc(2)Hex(11)	C[+57], N[+2189]	1563.3	3	4687.89	4688.87	-1	3.1	223	Specific	363.21	363.21	363.21	4.51	367	>sp|P07911|UROM_HUMAN Uromodulin OS=Homo sapiens OX=9606 GN=UMOD PE=1 SV=1	1	20230315_zy_umod_t-after.19983.19983.3	controllerType=0 controllerNumber=1 scan=19983	71.8547
R.C[+57.021]NTAAPM[+15.995]WLN[+2188.740]GTHPSSDEGIVSR.K	HexNAc(2)Hex(11)	C[+57], M[+16], N[+2189]	1569.3	3	4705.87	4704.87	1	-0.4	223	Specific	367.59	367.59	367.59	5.54	367	>sp|P07911|UROM_HUMAN Uromodulin OS=Homo sapiens OX=9606 GN=UMOD PE=1 SV=1	1	20230315_zy_umod_t-after.18397.18397.3	controllerType=0 controllerNumber=1 scan=18397	66.9257
R.C[+57.021]NTAAPMWLN[+2188.740]GTHPSSDEGIVSR.K	HexNAc(2)Hex(11)	C[+57], N[+2189]	1563.3	3	4687.89	4688.87	-1	3.7	223	Specific	372.59	372.59	372.59	5.82	367	>sp|P07911|UROM_HUMAN Uromodulin OS=Homo sapiens OX=9606 GN=UMOD PE=1 SV=1	1	20230315_zy_umod_t-after.19881.19881.4	controllerType=0 controllerNumber=1 scan=19881	71.5257
R.C[+57.021]NTAAPMWLN[+2188.740]GTHPSSDEGIVSR.K	HexNAc(2)Hex(11)	C[+57], N[+2189]	1172.72	4	4687.88	4688.87	-1	1.3	223	Specific	377.01	377.01	377.01	6.44	367	>sp|P07911|UROM_HUMAN Uromodulin OS=Homo sapiens OX=9606 GN=UMOD PE=1 SV=1	1	20230315_zy_umod_t-after.19998.19998.4	controllerType=0 controllerNumber=1 scan=19998	71.9062
R.C[+57.021]NTAAPMWLN[+2188.740]GTHPSSDEGIVSR.K	HexNAc(2)Hex(11)	C[+57], N[+2189]	1563.3	3	4687.89	4688.87	-1	3.9	223	Specific	399.75	399.75	399.75	5.71	367	>sp|P07911|UROM_HUMAN Uromodulin OS=Homo sapiens OX=9606 GN=UMOD PE=1 SV=1	1	20230315_zy_umod_t-after.19834.19834.3	controllerType=0 controllerNumber=1 scan=19834	71.3888
R.C[+57.021]NTAAPMWLN[+2188.740]GTHPSSDEGIVSR.K	HexNAc(2)Hex(11)	C[+57], N[+2189]	1173.23	4	4689.89	4688.87	1	1.6	223	Specific	414.73	414.73	414.73	6.36	367	>sp|P07911|UROM_HUMAN Uromodulin OS=Homo sapiens OX=9606 GN=UMOD PE=1 SV=1	1	20230315_zy_umod_t-after.9899.9899.4	controllerType=0 controllerNumber=1 scan=9899	36.1635
R.C[+57.021]NTAAPMWLN[+2188.740]GTHPSSDEGIVSR.K	HexNAc(2)Hex(11)	C[+57], N[+2189]	1173.23	4	4689.89	4688.87	1	2	223	Specific	429.2	429.2	429.2	6.12	367	>sp|P07911|UROM_HUMAN Uromodulin OS=Homo sapiens OX=9606 GN=UMOD PE=1 SV=1	1	20230315_zy_umod_t-after.9615.9615.4	controllerType=0 controllerNumber=1 scan=9615	35.1183
R.C[+57.021]NTAAPMWLN[+2188.740]GTHPSSDEGIVSR.K	HexNAc(2)Hex(11)	C[+57], N[+2189]	1563.3	3	4687.89	4688.87	-1	3.6	223	Specific	433.75	433.75	433.75	5.9	367	>sp|P07911|UROM_HUMAN Uromodulin OS=Homo sapiens OX=9606 GN=UMOD PE=1 SV=1	1	20230315_zy_umod_t-after.19842.19842.3	controllerType=0 controllerNumber=1 scan=19842	71.4039
R.C[+57.021]NTAAPMWLN[+2350.793]GTHPSSDEGIVSR.K	HexNAc(2)Hex(12)	C[+57], N[+2351]	1213.73	4	4851.9	4850.93	1	-5.4	223	Specific	399.1	399.1	399.1	6.93	367	>sp|P07911|UROM_HUMAN Uromodulin OS=Homo sapiens OX=9606 GN=UMOD PE=1 SV=1	1	20230315_zy_umod_t-after.12222.12222.4	controllerType=0 controllerNumber=1 scan=12222	44.5542
R.C[+57.021]NTAAPMWLN[+2350.793]GTHPSSDEGIVSR.K	HexNAc(2)Hex(12)	C[+57], N[+2351]	1213.24	4	4849.93	4850.93	-1	1.9	223	Specific	405.08	405.08	405.08	6.36	367	>sp|P07911|UROM_HUMAN Uromodulin OS=Homo sapiens OX=9606 GN=UMOD PE=1 SV=1	1	20230315_zy_umod_t-after.18431.18431.4	controllerType=0 controllerNumber=1 scan=18431	67.0363
R.C[+57.021]NTAAPMWLN[+2350.793]GTHPSSDEGIVSR.K	HexNAc(2)Hex(12)	C[+57], N[+2351]	1617.32	3	4849.93	4850.93	-1	1.4	223	Specific	516.81	516.81	516.81	6.54	367	>sp|P07911|UROM_HUMAN Uromodulin OS=Homo sapiens OX=9606 GN=UMOD PE=1 SV=1	1	20230315_zy_umod_t-after.18386.18386.3	controllerType=0 controllerNumber=1 scan=18386	66.8831
R.C[+57.021]NTAAPMWLN[+1540.529]GTHPSSDEGIVSR.K	HexNAc(2)Hex(7)	C[+57], N[+1541]	1347.9	3	4041.67	4040.66	1	1.6	223	Specific	206.04	206.04	206.04	2.57	367	>sp|P07911|UROM_HUMAN Uromodulin OS=Homo sapiens OX=9606 GN=UMOD PE=1 SV=1	1	20230315_zy_umod_t-after.10267.10267.3	controllerType=0 controllerNumber=1 scan=10267	37.4961
R.C[+57.021]NTAAPMWLN[+1540.529]GTHPSSDEGIVSR.K	HexNAc(2)Hex(7)	C[+57], N[+1541]	1347.9	3	4041.67	4040.66	1	1.7	223	Specific	238.99	221.75	221.75	4.05	367	>sp|P07911|UROM_HUMAN Uromodulin OS=Homo sapiens OX=9606 GN=UMOD PE=1 SV=1	1	20230315_zy_umod_t-after.10272.10272.3	controllerType=0 controllerNumber=1 scan=10272	37.5115
R.C[+57.021]NTAAPMWLN[+1702.581]GTHPSSDEGIVSR.K	HexNAc(2)Hex(8)	C[+57], N[+1703]	1401.92	3	4203.74	4202.72	1	4.6	223	Specific	253.26	253.26	253.26	3.68	367	>sp|P07911|UROM_HUMAN Uromodulin OS=Homo sapiens OX=9606 GN=UMOD PE=1 SV=1	1	20230315_zy_umod_t-after.12894.12894.3	controllerType=0 controllerNumber=1 scan=12894	47.0603
R.C[+57.021]NTAAPMWLN[+1702.581]GTHPSSDEGIVSR.K	HexNAc(2)Hex(8)	C[+57], N[+1703]	1401.58	3	4202.71	4202.72	0	-1.2	223	Specific	261.3	261.3	261.3	4.95	367	>sp|P07911|UROM_HUMAN Uromodulin OS=Homo sapiens OX=9606 GN=UMOD PE=1 SV=1	1	20230315_zy_umod_t-after.16168.16168.3	controllerType=0 controllerNumber=1 scan=16168	58.9966
R.C[+57.021]NTAAPMWLN[+1702.581]GTHPSSDEGIVSR.K	HexNAc(2)Hex(8)	C[+57], N[+1703]	1401.58	3	4202.74	4202.72	0	5.2	223	Specific	301.82	286.68	286.68	3.88	367	>sp|P07911|UROM_HUMAN Uromodulin OS=Homo sapiens OX=9606 GN=UMOD PE=1 SV=1	1	20230315_zy_umod_t-after.16291.16291.3	controllerType=0 controllerNumber=1 scan=16291	59.4479
R.C[+57.021]NTAAPMWLN[+1702.581]GTHPSSDEGIVSR.K	HexNAc(2)Hex(8)	C[+57], N[+1703]	1401.91	3	4203.72	4202.72	1	1.1	223	Specific	320.7	320.7	320.7	2.77	367	>sp|P07911|UROM_HUMAN Uromodulin OS=Homo sapiens OX=9606 GN=UMOD PE=1 SV=1	1	20230315_zy_umod_t-after.10490.10490.3	controllerType=0 controllerNumber=1 scan=10490	38.2881
R.C[+57.021]NTAAPMWLN[+1702.581]GTHPSSDEGIVSR.K	HexNAc(2)Hex(8)	C[+57], N[+1703]	1401.91	3	4203.73	4202.72	1	2.7	223	Specific	380.37	356.52	356.52	4.51	367	>sp|P07911|UROM_HUMAN Uromodulin OS=Homo sapiens OX=9606 GN=UMOD PE=1 SV=1	1	20230315_zy_umod_t-after.16180.16180.3	controllerType=0 controllerNumber=1 scan=16180	59.0387
R.C[+57.021]NTAAPMWLN[+1702.581]GTHPSSDEGIVSR.K	HexNAc(2)Hex(8)	C[+57], N[+1703]	1401.57	3	4202.71	4202.72	0	-2.2	223	Specific	452.41	452.41	452.41	7.1	367	>sp|P07911|UROM_HUMAN Uromodulin OS=Homo sapiens OX=9606 GN=UMOD PE=1 SV=1	1	20230315_zy_umod_t-after.16264.16264.3	controllerType=0 controllerNumber=1 scan=16264	59.3496
R.C[+57.021]NTAAPMWLN[+1702.581]GTHPSSDEGIVSR.K	HexNAc(2)Hex(8)	C[+57], N[+1703]	1401.58	3	4202.74	4202.72	0	5.7	223	Specific	515.04	515.04	515.04	5.58	367	>sp|P07911|UROM_HUMAN Uromodulin OS=Homo sapiens OX=9606 GN=UMOD PE=1 SV=1	1	20230315_zy_umod_t-after.16214.16214.3	controllerType=0 controllerNumber=1 scan=16214	59.1644
R.C[+57.021]NTAAPMWLN[+1702.581]GTHPSSDEGIVSR.K	HexNAc(2)Hex(8)	C[+57], N[+1703]	1401.57	3	4202.69	4202.72	0	-5.7	223	Specific	691.24	691.24	691.24	10.37	367	>sp|P07911|UROM_HUMAN Uromodulin OS=Homo sapiens OX=9606 GN=UMOD PE=1 SV=1	1	20230315_zy_umod_t-after.16132.16132.3	controllerType=0 controllerNumber=1 scan=16132	58.8626
R.C[+57.021]NTAAPMWLN[+1864.634]GTHPSSDEGIVSR.K	HexNAc(2)Hex(9)	C[+57], N[+1865]	1455.93	3	4365.78	4364.77	1	2.7	223	Specific	214.01	214.01	214.01	3.66	367	>sp|P07911|UROM_HUMAN Uromodulin OS=Homo sapiens OX=9606 GN=UMOD PE=1 SV=1	1	20230315_zy_umod_t-after.10308.10308.3	controllerType=0 controllerNumber=1 scan=10308	37.6468
R.C[+57.021]NTAAPMWLN[+1864.634]GTHPSSDEGIVSR.K	HexNAc(2)Hex(9)	C[+57], N[+1865]	1092.2	4	4365.78	4364.77	1	1.2	223	Specific	234.94	234.94	234.94	2.84	367	>sp|P07911|UROM_HUMAN Uromodulin OS=Homo sapiens OX=9606 GN=UMOD PE=1 SV=1	1	20230315_zy_umod_t-after.10192.10192.4	controllerType=0 controllerNumber=1 scan=10192	37.2335
R.C[+57.021]NTAAPMWLN[+1864.634]GTHPSSDEGIVSR.K	HexNAc(2)Hex(9)	C[+57], N[+1865]	1455.93	3	4365.78	4364.77	1	1.6	223	Specific	240.86	240.86	240.86	4.22	367	>sp|P07911|UROM_HUMAN Uromodulin OS=Homo sapiens OX=9606 GN=UMOD PE=1 SV=1	1	20230315_zy_umod_t-after.9758.9758.3	controllerType=0 controllerNumber=1 scan=9758	35.6453
R.C[+57.021]NTAAPMWLN[+1864.634]GTHPSSDEGIVSR.K	HexNAc(2)Hex(9)	C[+57], N[+1865]	1455.6	3	4364.78	4364.77	0	3.1	223	Specific	241.67	241.67	241.67	3.84	367	>sp|P07911|UROM_HUMAN Uromodulin OS=Homo sapiens OX=9606 GN=UMOD PE=1 SV=1	1	20230315_zy_umod_t-after.10341.10341.3	controllerType=0 controllerNumber=1 scan=10341	37.7592
R.C[+57.021]NTAAPMWLN[+1864.634]GTHPSSDEGIVSR.K	HexNAc(2)Hex(9)	C[+57], N[+1865]	1455.93	3	4365.78	4364.77	1	1.6	223	Specific	247.02	247.02	247.02	4.22	367	>sp|P07911|UROM_HUMAN Uromodulin OS=Homo sapiens OX=9606 GN=UMOD PE=1 SV=1	1	20230315_zy_umod_t-after.10686.10686.3	controllerType=0 controllerNumber=1 scan=10686	39.0006
R.C[+57.021]NTAAPMWLN[+1864.634]GTHPSSDEGIVSR.K	HexNAc(2)Hex(9)	C[+57], N[+1865]	1092.2	4	4365.77	4364.77	1	-0.1	223	Specific	248.13	248.13	248.13	3.43	367	>sp|P07911|UROM_HUMAN Uromodulin OS=Homo sapiens OX=9606 GN=UMOD PE=1 SV=1	1	20230315_zy_umod_t-after.10346.10346.4	controllerType=0 controllerNumber=1 scan=10346	37.7767
R.C[+57.021]NTAAPMWLN[+1864.634]GTHPSSDEGIVSR.K	HexNAc(2)Hex(9)	C[+57], N[+1865]	1092.2	4	4365.77	4364.77	1	-0.1	223	Specific	292.82	292.82	292.82	5.21	367	>sp|P07911|UROM_HUMAN Uromodulin OS=Homo sapiens OX=9606 GN=UMOD PE=1 SV=1	1	20230315_zy_umod_t-after.10300.10300.4	controllerType=0 controllerNumber=1 scan=10300	37.6147
R.C[+57.021]NTAAPMWLN[+1864.634]GTHPSSDEGIVSR.K	HexNAc(2)Hex(9)	C[+57], N[+1865]	1091.95	4	4364.78	4364.77	0	2.2	223	Specific	322.93	322.93	322.93	3.04	367	>sp|P07911|UROM_HUMAN Uromodulin OS=Homo sapiens OX=9606 GN=UMOD PE=1 SV=1	1	20230315_zy_umod_t-after.9985.9985.4	controllerType=0 controllerNumber=1 scan=9985	36.483
R.C[+57.021]NTAAPMWLN[+1864.634]GTHPSSDEGIVSR.K	HexNAc(2)Hex(9)	C[+57], N[+1865]	1455.93	3	4365.79	4364.77	1	3.8	223	Specific	332.73	332.73	332.73	4.3	367	>sp|P07911|UROM_HUMAN Uromodulin OS=Homo sapiens OX=9606 GN=UMOD PE=1 SV=1	1	20230315_zy_umod_t-after.9974.9974.4	controllerType=0 controllerNumber=1 scan=9974	36.4454
R.C[+57.021]NTAAPMWLN[+1864.634]GTHPSSDEGIVSR.K	HexNAc(2)Hex(9)	C[+57], N[+1865]	1455.93	3	4365.79	4364.77	1	3.8	223	Specific	341.56	341.56	341.56	4.3	367	>sp|P07911|UROM_HUMAN Uromodulin OS=Homo sapiens OX=9606 GN=UMOD PE=1 SV=1	1	20230315_zy_umod_t-after.10141.10141.3	controllerType=0 controllerNumber=1 scan=10141	37.0446
R.C[+57.021]NTAAPMWLN[+1864.634]GTHPSSDEGIVSR.K	HexNAc(2)Hex(9)	C[+57], N[+1865]	1455.93	3	4365.77	4364.77	1	-0.6	223	Specific	381.62	381.62	381.62	6.88	367	>sp|P07911|UROM_HUMAN Uromodulin OS=Homo sapiens OX=9606 GN=UMOD PE=1 SV=1	1	20230315_zy_umod_t-after.15827.15827.3	controllerType=0 controllerNumber=1 scan=15827	57.7853
R.C[+57.021]NTAAPMWLN[+1548.545]GTHPSSDEGIVSR.K	HexNAc(3)Hex(4)NeuAc(1)	C[+57], N[+1549]	1350.23	3	4048.69	4048.68	0	2.1	223	Specific	522.61	522.61	522.61	6.48	367	>sp|P07911|UROM_HUMAN Uromodulin OS=Homo sapiens OX=9606 GN=UMOD PE=1 SV=1	1	20230315_zy_umod_t-after.17615.17615.3	controllerType=0 controllerNumber=1 scan=17615	64.2026
R.C[+57.021]NTAAPMWLN[+1548.545]GTHPSSDEGIVSR.K	HexNAc(3)Hex(4)NeuAc(1)	C[+57], N[+1549]	1350.23	3	4048.68	4048.68	0	0.7	223	Specific	583.52	583.52	583.52	8.37	367	>sp|P07911|UROM_HUMAN Uromodulin OS=Homo sapiens OX=9606 GN=UMOD PE=1 SV=1	1	20230315_zy_umod_t-after.18160.18160.3	controllerType=0 controllerNumber=1 scan=18160	66.1206
R.C[+57.021]NTAAPM[+15.995]WLN[+1727.613]GTHPSSDEGIVSR.K	HexNAc(3)Hex(6)Fuc(1)	C[+57], M[+16], N[+1728]	1415.59	3	4244.77	4243.74	1	5.4	223	Specific	203.06	203.06	203.06	3.42	367	>sp|P07911|UROM_HUMAN Uromodulin OS=Homo sapiens OX=9606 GN=UMOD PE=1 SV=1	1	20230315_zy_umod_t-after.12922.12922.3	controllerType=0 controllerNumber=1 scan=12922	47.1632
R.C[+57.021]NTAAPM[+15.995]WLN[+2018.708]GTHPSSDEGIVSR.K	HexNAc(3)Hex(6)Fuc(1)NeuAc(1)	C[+57], M[+16], N[+2019]	1512.63	3	4535.86	4534.84	1	5.3	223	Specific	224.73	224.73	224.73	3.5	367	>sp|P07911|UROM_HUMAN Uromodulin OS=Homo sapiens OX=9606 GN=UMOD PE=1 SV=1	1	20230315_zy_umod_t-after.14291.14291.3	controllerType=0 controllerNumber=1 scan=14291	52.2005
R.C[+57.021]NTAAPM[+15.995]WLN[+2018.708]GTHPSSDEGIVSR.K	HexNAc(3)Hex(6)Fuc(1)NeuAc(1)	C[+57], M[+16], N[+2019]	1134.72	4	4535.87	4534.84	1	5.4	223	Specific	236.27	236.27	236.27	2.15	367	>sp|P07911|UROM_HUMAN Uromodulin OS=Homo sapiens OX=9606 GN=UMOD PE=1 SV=1	1	20230315_zy_umod_t-after.14292.14292.4	controllerType=0 controllerNumber=1 scan=14292	52.2039
R.C[+57.021]NTAAPM[+15.995]WLN[+2018.708]GTHPSSDEGIVSR.K	HexNAc(3)Hex(6)Fuc(1)NeuAc(1)	C[+57], M[+16], N[+2019]	1512.28	3	4534.81	4534.84	0	-5.9	223	Specific	505.85	505.85	505.85	7.19	367	>sp|P07911|UROM_HUMAN Uromodulin OS=Homo sapiens OX=9606 GN=UMOD PE=1 SV=1	1	20230315_zy_umod_t-after.17986.17986.3	controllerType=0 controllerNumber=1 scan=17986	65.5244
R.C[+57.021]NTAAPM[+15.995]WLN[+1872.651]GTHPSSDEGIVSR.K	HexNAc(3)Hex(6)NeuAc(1)	C[+57], M[+16], N[+1873]	1463.59	3	4388.76	4388.78	0	-4.4	223	Specific	207.97	207.97	207.97	4.69	367	>sp|P07911|UROM_HUMAN Uromodulin OS=Homo sapiens OX=9606 GN=UMOD PE=1 SV=1	1	20230315_zy_umod_t-after.16358.16358.4	controllerType=0 controllerNumber=1 scan=16358	59.699
R.C[+57.021]NTAAPM[+15.995]WLN[+1872.651]GTHPSSDEGIVSR.K	HexNAc(3)Hex(6)NeuAc(1)	C[+57], M[+16], N[+1873]	1463.59	3	4388.76	4388.78	0	-4.5	223	Specific	311.28	311.28	311.28	5.16	367	>sp|P07911|UROM_HUMAN Uromodulin OS=Homo sapiens OX=9606 GN=UMOD PE=1 SV=1	1	20230315_zy_umod_t-after.16311.16311.2	controllerType=0 controllerNumber=1 scan=16311	59.5281
R.C[+57.021]NTAAPM[+15.995]WLN[+1872.651]GTHPSSDEGIVSR.K	HexNAc(3)Hex(6)NeuAc(1)	C[+57], M[+16], N[+1873]	1463.93	3	4389.77	4388.78	1	-3.8	223	Specific	339.23	339.23	339.23	3.87	367	>sp|P07911|UROM_HUMAN Uromodulin OS=Homo sapiens OX=9606 GN=UMOD PE=1 SV=1	1	20230315_zy_umod_t-after.19437.19437.3	controllerType=0 controllerNumber=1 scan=19437	70.1197
R.C[+57.021]NTAAPM[+15.995]WLN[+1872.651]GTHPSSDEGIVSR.K	HexNAc(3)Hex(6)NeuAc(1)	C[+57], M[+16], N[+1873]	1097.94	4	4388.76	4388.78	0	-5	223	Specific	356.62	356.62	356.62	4.06	367	>sp|P07911|UROM_HUMAN Uromodulin OS=Homo sapiens OX=9606 GN=UMOD PE=1 SV=1	1	20230315_zy_umod_t-after.15878.15878.4	controllerType=0 controllerNumber=1 scan=15878	57.9711
R.C[+57.021]NTAAPM[+15.995]WLN[+1872.651]GTHPSSDEGIVSR.K	HexNAc(3)Hex(6)NeuAc(1)	C[+57], M[+16], N[+1873]	1463.93	3	4389.76	4388.78	1	-4.2	223	Specific	375.36	375.36	375.36	6.88	367	>sp|P07911|UROM_HUMAN Uromodulin OS=Homo sapiens OX=9606 GN=UMOD PE=1 SV=1	1	20230315_zy_umod_t-after.15969.15969.3	controllerType=0 controllerNumber=1 scan=15969	58.2824
R.C[+57.021]NTAAPM[+15.995]WLN[+1872.651]GTHPSSDEGIVSR.K	HexNAc(3)Hex(6)NeuAc(1)	C[+57], M[+16], N[+1873]	1463.92	3	4389.76	4388.78	1	-6	223	Specific	394.08	394.08	394.08	6.88	367	>sp|P07911|UROM_HUMAN Uromodulin OS=Homo sapiens OX=9606 GN=UMOD PE=1 SV=1	1	20230315_zy_umod_t-after.16205.16205.3	controllerType=0 controllerNumber=1 scan=16205	59.1276
R.C[+57.021]NTAAPM[+15.995]WLN[+1872.651]GTHPSSDEGIVSR.K	HexNAc(3)Hex(6)NeuAc(1)	C[+57], M[+16], N[+1873]	1463.93	3	4389.76	4388.78	1	-4.8	223	Specific	397.05	397.05	397.05	6.88	367	>sp|P07911|UROM_HUMAN Uromodulin OS=Homo sapiens OX=9606 GN=UMOD PE=1 SV=1	1	20230315_zy_umod_t-after.15847.15847.3	controllerType=0 controllerNumber=1 scan=15847	57.8615
R.C[+57.021]NTAAPM[+15.995]WLN[+1872.651]GTHPSSDEGIVSR.K	HexNAc(3)Hex(6)NeuAc(1)	C[+57], M[+16], N[+1873]	1098.19	4	4389.76	4388.78	1	-6.2	223	Specific	412.74	412.74	412.74	7	367	>sp|P07911|UROM_HUMAN Uromodulin OS=Homo sapiens OX=9606 GN=UMOD PE=1 SV=1	1	20230315_zy_umod_t-after.16218.16218.4	controllerType=0 controllerNumber=1 scan=16218	59.1766
R.C[+57.021]NTAAPM[+15.995]WLN[+1872.651]GTHPSSDEGIVSR.K	HexNAc(3)Hex(6)NeuAc(1)	C[+57], M[+16], N[+1873]	1463.92	3	4389.76	4388.78	1	-5.5	223	Specific	446.44	446.44	446.44	7.1	367	>sp|P07911|UROM_HUMAN Uromodulin OS=Homo sapiens OX=9606 GN=UMOD PE=1 SV=1	1	20230315_zy_umod_t-after.16367.16367.3	controllerType=0 controllerNumber=1 scan=16367	59.7374
R.C[+57.021]NTAAPM[+15.995]WLN[+1872.651]GTHPSSDEGIVSR.K	HexNAc(3)Hex(6)NeuAc(1)	C[+57], M[+16], N[+1873]	1463.93	3	4389.77	4388.78	1	-4	223	Specific	466.68	466.68	466.68	7.1	367	>sp|P07911|UROM_HUMAN Uromodulin OS=Homo sapiens OX=9606 GN=UMOD PE=1 SV=1	1	20230315_zy_umod_t-after.16220.16220.3	controllerType=0 controllerNumber=1 scan=16220	59.181
R.C[+57.021]NTAAPM[+15.995]WLN[+1872.651]GTHPSSDEGIVSR.K	HexNAc(3)Hex(6)NeuAc(1)	C[+57], M[+16], N[+1873]	1463.92	3	4389.76	4388.78	1	-5.4	223	Specific	470.79	470.79	470.79	7.1	367	>sp|P07911|UROM_HUMAN Uromodulin OS=Homo sapiens OX=9606 GN=UMOD PE=1 SV=1	1	20230315_zy_umod_t-after.15854.15854.3	controllerType=0 controllerNumber=1 scan=15854	57.8818
R.C[+57.021]NTAAPM[+15.995]WLN[+1298.476]GTHPSSDEGIVSR.K	HexNAc(4)Hex(3)	C[+57], M[+16], N[+1298]	1272.2	3	3814.59	3814.61	0	-5.1	223	Specific	259.86	259.86	259.86	4.87	367	>sp|P07911|UROM_HUMAN Uromodulin OS=Homo sapiens OX=9606 GN=UMOD PE=1 SV=1	1	20230315_zy_umod_t-after.8574.8574.3	controllerType=0 controllerNumber=1 scan=8574	31.2864
R.C[+57.021]NTAAPM[+15.995]WLN[+1298.476]GTHPSSDEGIVSR.K	HexNAc(4)Hex(3)	C[+57], M[+16], N[+1298]	1272.2	3	3814.58	3814.61	0	-5.4	223	Specific	265.56	265.56	265.56	4.95	367	>sp|P07911|UROM_HUMAN Uromodulin OS=Homo sapiens OX=9606 GN=UMOD PE=1 SV=1	1	20230315_zy_umod_t-after.8821.8821.3	controllerType=0 controllerNumber=1 scan=8821	32.1896
R.C[+57.021]NTAAPM[+15.995]WLN[+1298.476]GTHPSSDEGIVSR.K	HexNAc(4)Hex(3)	C[+57], M[+16], N[+1298]	1272.2	3	3814.58	3814.61	0	-5.8	223	Specific	292.91	292.91	292.91	3.67	367	>sp|P07911|UROM_HUMAN Uromodulin OS=Homo sapiens OX=9606 GN=UMOD PE=1 SV=1	1	20230315_zy_umod_t-after.8492.8492.3	controllerType=0 controllerNumber=1 scan=8492	30.9939
R.C[+57.021]NTAAPM[+15.995]WLN[+1298.476]GTHPSSDEGIVSR.K	HexNAc(4)Hex(3)	C[+57], M[+16], N[+1298]	1272.2	3	3814.58	3814.61	0	-5.7	223	Specific	295.43	295.43	295.43	3.41	367	>sp|P07911|UROM_HUMAN Uromodulin OS=Homo sapiens OX=9606 GN=UMOD PE=1 SV=1	1	20230315_zy_umod_t-after.8609.8609.3	controllerType=0 controllerNumber=1 scan=8609	31.4101
R.C[+57.021]NTAAPM[+15.995]WLN[+1298.476]GTHPSSDEGIVSR.K	HexNAc(4)Hex(3)	C[+57], M[+16], N[+1298]	1272.2	3	3814.59	3814.61	0	-5.2	223	Specific	307.49	307.49	307.49	3.41	367	>sp|P07911|UROM_HUMAN Uromodulin OS=Homo sapiens OX=9606 GN=UMOD PE=1 SV=1	1	20230315_zy_umod_t-after.8657.8657.3	controllerType=0 controllerNumber=1 scan=8657	31.5832
R.C[+57.021]NTAAPM[+15.995]WLN[+1298.476]GTHPSSDEGIVSR.K	HexNAc(4)Hex(3)	C[+57], M[+16], N[+1298]	1272.2	3	3814.58	3814.61	0	-5.9	223	Specific	324.58	324.58	324.58	3.61	367	>sp|P07911|UROM_HUMAN Uromodulin OS=Homo sapiens OX=9606 GN=UMOD PE=1 SV=1	1	20230315_zy_umod_t-after.8484.8484.3	controllerType=0 controllerNumber=1 scan=8484	30.9578
R.C[+57.021]NTAAPMWLN[+1298.476]GTHPSSDEGIVSR.K	HexNAc(4)Hex(3)	C[+57], N[+1298]	1266.88	3	3798.62	3798.61	0	3.5	223	Specific	714.16	714.16	714.16	10.32	367	>sp|P07911|UROM_HUMAN Uromodulin OS=Homo sapiens OX=9606 GN=UMOD PE=1 SV=1	1	20230315_zy_umod_t-after.14124.14124.3	controllerType=0 controllerNumber=1 scan=14124	51.5822
R.C[+57.021]NTAAPMWLN[+1298.476]GTHPSSDEGIVSR.K	HexNAc(4)Hex(3)	C[+57], N[+1298]	1266.88	3	3798.61	3798.61	0	0.4	223	Specific	749.47	749.47	749.47	11.37	367	>sp|P07911|UROM_HUMAN Uromodulin OS=Homo sapiens OX=9606 GN=UMOD PE=1 SV=1	1	20230315_zy_umod_t-after.14406.14406.3	controllerType=0 controllerNumber=1 scan=14406	52.6262
R.C[+57.021]NTAAPMWLN[+1444.534]GTHPSSDEGIVSR.K	HexNAc(4)Hex(3)Fuc(1)	C[+57], N[+1445]	1315.56	3	3944.67	3944.67	0	1	223	Specific	420.25	420.25	420.25	6.46	367	>sp|P07911|UROM_HUMAN Uromodulin OS=Homo sapiens OX=9606 GN=UMOD PE=1 SV=1	1	20230315_zy_umod_t-after.14283.14283.3	controllerType=0 controllerNumber=1 scan=14283	52.1648
R.C[+57.021]NTAAPMWLN[+1444.534]GTHPSSDEGIVSR.K	HexNAc(4)Hex(3)Fuc(1)	C[+57], N[+1445]	1315.56	3	3944.67	3944.67	0	1.7	223	Specific	631.68	631.68	631.68	8.73	367	>sp|P07911|UROM_HUMAN Uromodulin OS=Homo sapiens OX=9606 GN=UMOD PE=1 SV=1	1	20230315_zy_umod_t-after.14279.14279.3	controllerType=0 controllerNumber=1 scan=14279	52.1546
R.C[+57.021]NTAAPM[+15.995]WLN[+1589.571]GTHPSSDEGIVSR.K	HexNAc(4)Hex(3)NeuAc(1)	C[+57], M[+16], N[+1590]	1369.23	3	4105.68	4105.7	0	-4.5	223	Specific	209.63	209.63	209.63	3.21	367	>sp|P07911|UROM_HUMAN Uromodulin OS=Homo sapiens OX=9606 GN=UMOD PE=1 SV=1	1	20230315_zy_umod_t-after.10064.10064.3	controllerType=0 controllerNumber=1 scan=10064	36.7708
R.C[+57.021]NTAAPM[+15.995]WLN[+1589.571]GTHPSSDEGIVSR.K	HexNAc(4)Hex(3)NeuAc(1)	C[+57], M[+16], N[+1590]	1027.17	4	4105.68	4105.7	0	-5.6	223	Specific	256.43	256.43	256.43	3.43	367	>sp|P07911|UROM_HUMAN Uromodulin OS=Homo sapiens OX=9606 GN=UMOD PE=1 SV=1	1	20230315_zy_umod_t-after.9982.9982.4	controllerType=0 controllerNumber=1 scan=9982	36.4733
R.C[+57.021]NTAAPMWLN[+1589.571]GTHPSSDEGIVSR.K	HexNAc(4)Hex(3)NeuAc(1)	C[+57], N[+1590]	1363.9	3	4089.7	4089.71	0	-1.9	223	Specific	299.08	299.08	299.08	5.16	367	>sp|P07911|UROM_HUMAN Uromodulin OS=Homo sapiens OX=9606 GN=UMOD PE=1 SV=1	1	20230315_zy_umod_t-after.16140.16140.3	controllerType=0 controllerNumber=1 scan=16140	58.8914
R.C[+57.021]NTAAPM[+15.995]WLN[+1589.571]GTHPSSDEGIVSR.K	HexNAc(4)Hex(3)NeuAc(1)	C[+57], M[+16], N[+1590]	1027.18	4	4105.68	4105.7	0	-5.3	223	Specific	322.6	322.6	322.6	5.41	367	>sp|P07911|UROM_HUMAN Uromodulin OS=Homo sapiens OX=9606 GN=UMOD PE=1 SV=1	1	20230315_zy_umod_t-after.9794.9794.4	controllerType=0 controllerNumber=1 scan=9794	35.783
R.C[+57.021]NTAAPM[+15.995]WLN[+1589.571]GTHPSSDEGIVSR.K	HexNAc(4)Hex(3)NeuAc(1)	C[+57], M[+16], N[+1590]	1369.23	3	4105.68	4105.7	0	-5.8	223	Specific	336.96	336.96	336.96	5.35	367	>sp|P07911|UROM_HUMAN Uromodulin OS=Homo sapiens OX=9606 GN=UMOD PE=1 SV=1	1	20230315_zy_umod_t-after.9964.9964.3	controllerType=0 controllerNumber=1 scan=9964	36.4093
R.C[+57.021]NTAAPM[+15.995]WLN[+1589.571]GTHPSSDEGIVSR.K	HexNAc(4)Hex(3)NeuAc(1)	C[+57], M[+16], N[+1590]	1369.23	3	4105.68	4105.7	0	-4.5	223	Specific	368.5	368.5	368.5	4.06	367	>sp|P07911|UROM_HUMAN Uromodulin OS=Homo sapiens OX=9606 GN=UMOD PE=1 SV=1	1	20230315_zy_umod_t-after.10155.10155.3	controllerType=0 controllerNumber=1 scan=10155	37.0954
R.C[+57.021]NTAAPM[+15.995]WLN[+1589.571]GTHPSSDEGIVSR.K	HexNAc(4)Hex(3)NeuAc(1)	C[+57], M[+16], N[+1590]	1369.23	3	4105.68	4105.7	0	-5.1	223	Specific	378.7	378.7	378.7	5.4	367	>sp|P07911|UROM_HUMAN Uromodulin OS=Homo sapiens OX=9606 GN=UMOD PE=1 SV=1	1	20230315_zy_umod_t-after.10027.10027.3	controllerType=0 controllerNumber=1 scan=10027	36.6326
R.C[+57.021]NTAAPM[+15.995]WLN[+1589.571]GTHPSSDEGIVSR.K	HexNAc(4)Hex(3)NeuAc(1)	C[+57], M[+16], N[+1590]	1368.9	3	4104.69	4105.7	-1	-2.7	223	Specific	391.56	391.56	391.56	6.88	367	>sp|P07911|UROM_HUMAN Uromodulin OS=Homo sapiens OX=9606 GN=UMOD PE=1 SV=1	1	20230315_zy_umod_t-after.17094.17094.4	controllerType=0 controllerNumber=1 scan=17094	62.3843
R.C[+57.021]NTAAPM[+15.995]WLN[+1589.571]GTHPSSDEGIVSR.K	HexNAc(4)Hex(3)NeuAc(1)	C[+57], M[+16], N[+1590]	1027.17	4	4105.68	4105.7	0	-5.9	223	Specific	464.6	464.6	464.6	7.15	367	>sp|P07911|UROM_HUMAN Uromodulin OS=Homo sapiens OX=9606 GN=UMOD PE=1 SV=1	1	20230315_zy_umod_t-after.9799.9799.4	controllerType=0 controllerNumber=1 scan=9799	35.7966
R.C[+57.021]NTAAPMWLN[+1606.587]GTHPSSDEGIVSR.K	HexNAc(4)Hex(4)Fuc(1)	C[+57], N[+1607]	1369.24	3	4105.7	4106.72	-1	-4.9	223	Specific	377.9	377.9	29.43	6.88	367	>sp|P07911|UROM_HUMAN Uromodulin OS=Homo sapiens OX=9606 GN=UMOD PE=1 SV=1	1	20230315_zy_umod_t-after.18280.18280.3	controllerType=0 controllerNumber=1 scan=18280	66.5313
R.C[+57.021]NTAAPMWLN[+1897.682]GTHPSSDEGIVSR.K	HexNAc(4)Hex(4)Fuc(1)NeuAc(1)	C[+57], N[+1898]	1466.27	3	4396.79	4397.82	-1	-4.5	223	Specific	357.56	357.56	357.56	5.49	367	>sp|P07911|UROM_HUMAN Uromodulin OS=Homo sapiens OX=9606 GN=UMOD PE=1 SV=1	1	20230315_zy_umod_t-after.19292.19292.3	controllerType=0 controllerNumber=1 scan=19292	69.6802
R.C[+57.021]NTAAPMWLN[+1897.682]GTHPSSDEGIVSR.K	HexNAc(4)Hex(4)Fuc(1)NeuAc(1)	C[+57], N[+1898]	1466.94	3	4398.79	4397.82	1	-6.2	223	Specific	371.34	371.34	371.34	5.54	367	>sp|P07911|UROM_HUMAN Uromodulin OS=Homo sapiens OX=9606 GN=UMOD PE=1 SV=1	1	20230315_zy_umod_t-after.8358.8358.3	controllerType=0 controllerNumber=1 scan=8358	30.4874
R.C[+57.021]NTAAPMWLN[+1897.682]GTHPSSDEGIVSR.K	HexNAc(4)Hex(4)Fuc(1)NeuAc(1)	C[+57], N[+1898]	1466.27	3	4396.79	4397.82	-1	-4.6	223	Specific	450.26	450.26	450.26	7.1	367	>sp|P07911|UROM_HUMAN Uromodulin OS=Homo sapiens OX=9606 GN=UMOD PE=1 SV=1	1	20230315_zy_umod_t-after.19215.19215.3	controllerType=0 controllerNumber=1 scan=19215	69.4359
R.C[+57.021]NTAAPMWLN[+1897.682]GTHPSSDEGIVSR.K	HexNAc(4)Hex(4)Fuc(1)NeuAc(1)	C[+57], N[+1898]	1466.27	3	4396.79	4397.82	-1	-4.9	223	Specific	461.54	461.54	461.54	7.1	367	>sp|P07911|UROM_HUMAN Uromodulin OS=Homo sapiens OX=9606 GN=UMOD PE=1 SV=1	1	20230315_zy_umod_t-after.19147.19147.3	controllerType=0 controllerNumber=1 scan=19147	69.2201
R.C[+57.021]NTAAPMWLN[+1897.682]GTHPSSDEGIVSR.K	HexNAc(4)Hex(4)Fuc(1)NeuAc(1)	C[+57], N[+1898]	1466.27	3	4396.79	4397.82	-1	-5.2	223	Specific	500.84	500.84	500.84	7.19	367	>sp|P07911|UROM_HUMAN Uromodulin OS=Homo sapiens OX=9606 GN=UMOD PE=1 SV=1	1	20230315_zy_umod_t-after.19173.19173.3	controllerType=0 controllerNumber=1 scan=19173	69.3101
R.C[+57.021]NTAAPM[+15.995]WLN[+1751.624]GTHPSSDEGIVSR.K	HexNAc(4)Hex(4)NeuAc(1)	C[+57], M[+16], N[+1752]	1423.26	3	4267.77	4267.75	0	3.1	223	Specific	216.95	216.95	13.25	3.66	367	>sp|P07911|UROM_HUMAN Uromodulin OS=Homo sapiens OX=9606 GN=UMOD PE=1 SV=1	1	20230315_zy_umod_t-after.18067.18067.3	controllerType=0 controllerNumber=1 scan=18067	65.8218
R.C[+57.021]NTAAPMWLN[+1751.624]GTHPSSDEGIVSR.K	HexNAc(4)Hex(4)NeuAc(1)	C[+57], N[+1752]	1417.92	3	4251.74	4251.76	0	-3.5	223	Specific	368.09	368.09	368.09	5.54	367	>sp|P07911|UROM_HUMAN Uromodulin OS=Homo sapiens OX=9606 GN=UMOD PE=1 SV=1	1	20230315_zy_umod_t-after.18047.18047.3	controllerType=0 controllerNumber=1 scan=18047	65.743
R.C[+57.021]NTAAPMWLN[+1751.624]GTHPSSDEGIVSR.K	HexNAc(4)Hex(4)NeuAc(1)	C[+57], N[+1752]	1063.44	4	4250.76	4251.76	-1	0.6	223	Specific	414.51	414.51	414.51	7	367	>sp|P07911|UROM_HUMAN Uromodulin OS=Homo sapiens OX=9606 GN=UMOD PE=1 SV=1	1	20230315_zy_umod_t-after.18075.18075.4	controllerType=0 controllerNumber=1 scan=18075	65.8408
R.C[+57.021]NTAAPMWLN[+1751.624]GTHPSSDEGIVSR.K	HexNAc(4)Hex(4)NeuAc(1)	C[+57], N[+1752]	1417.92	3	4251.75	4251.76	0	-2.7	223	Specific	515.86	515.86	515.86	7.19	367	>sp|P07911|UROM_HUMAN Uromodulin OS=Homo sapiens OX=9606 GN=UMOD PE=1 SV=1	1	20230315_zy_umod_t-after.18056.18056.3	controllerType=0 controllerNumber=1 scan=18056	65.7784
R.C[+57.021]NTAAPMWLN[+1751.624]GTHPSSDEGIVSR.K	HexNAc(4)Hex(4)NeuAc(1)	C[+57], N[+1752]	1417.59	3	4250.76	4251.76	-1	1.7	223	Specific	580.66	580.66	580.66	7.73	367	>sp|P07911|UROM_HUMAN Uromodulin OS=Homo sapiens OX=9606 GN=UMOD PE=1 SV=1	1	20230315_zy_umod_t-after.15931.15931.3	controllerType=0 controllerNumber=1 scan=15931	58.152
R.C[+57.021]NTAAPMWLN[+1751.624]GTHPSSDEGIVSR.K	HexNAc(4)Hex(4)NeuAc(1)	C[+57], N[+1752]	1417.93	3	4251.76	4251.76	0	1.2	223	Specific	740.45	740.45	740.45	10.88	367	>sp|P07911|UROM_HUMAN Uromodulin OS=Homo sapiens OX=9606 GN=UMOD PE=1 SV=1	1	20230315_zy_umod_t-after.15956.15956.3	controllerType=0 controllerNumber=1 scan=15956	58.234
R.C[+57.021]NTAAPMWLN[+1622.582]GTHPSSDEGIVSR.K	HexNAc(4)Hex(5)	C[+57], N[+1623]	1374.91	3	4122.72	4122.72	0	1.3	223	Specific	524.65	524.65	160.31	6.87	367	>sp|P07911|UROM_HUMAN Uromodulin OS=Homo sapiens OX=9606 GN=UMOD PE=1 SV=1	1	20230315_zy_umod_t-after.14029.14029.3	controllerType=0 controllerNumber=1 scan=14029	51.2278
R.C[+57.021]NTAAPMWLN[+1622.582]GTHPSSDEGIVSR.K	HexNAc(4)Hex(5)	C[+57], N[+1623]	1374.91	3	4122.72	4122.72	0	1.3	223	Specific	662.75	662.75	242.82	9.88	367	>sp|P07911|UROM_HUMAN Uromodulin OS=Homo sapiens OX=9606 GN=UMOD PE=1 SV=1	1	20230315_zy_umod_t-after.14112.14112.3	controllerType=0 controllerNumber=1 scan=14112	51.5365
R.C[+57.021]NTAAPMWLN[+1622.582]GTHPSSDEGIVSR.K	HexNAc(4)Hex(5)	C[+57], N[+1623]	1374.91	3	4122.72	4122.72	0	0.3	223	Specific	820.16	820.16	337.59	13.37	367	>sp|P07911|UROM_HUMAN Uromodulin OS=Homo sapiens OX=9606 GN=UMOD PE=1 SV=1	1	20230315_zy_umod_t-after.14023.14023.3	controllerType=0 controllerNumber=1 scan=14023	51.2113
R.C[+57.021]NTAAPMWLN[+1622.582]GTHPSSDEGIVSR.K	HexNAc(4)Hex(5)	C[+57], N[+1623]	1031.43	4	4122.71	4122.72	0	-0.3	223	Specific	887.79	887.79	470.42	14.43	367	>sp|P07911|UROM_HUMAN Uromodulin OS=Homo sapiens OX=9606 GN=UMOD PE=1 SV=1	1	20230315_zy_umod_t-after.14037.14037.4	controllerType=0 controllerNumber=1 scan=14037	51.2645
R.C[+57.021]NTAAPM[+15.995]WLN[+1768.640]GTHPSSDEGIVSR.K	HexNAc(4)Hex(5)Fuc(1)	C[+57], M[+16], N[+1769]	1428.92	3	4284.76	4284.77	0	-2.5	223	Specific	424.68	424.68	112.45	6.95	367	>sp|P07911|UROM_HUMAN Uromodulin OS=Homo sapiens OX=9606 GN=UMOD PE=1 SV=1	1	20230315_zy_umod_t-after.11894.11894.3	controllerType=0 controllerNumber=1 scan=11894	43.3747
R.C[+57.021]NTAAPMWLN[+1768.640]GTHPSSDEGIVSR.K	HexNAc(4)Hex(5)Fuc(1)	C[+57], N[+1769]	1423.6	3	4268.78	4268.77	0	2	223	Specific	528.87	507.29	507.29	6.71	367	>sp|P07911|UROM_HUMAN Uromodulin OS=Homo sapiens OX=9606 GN=UMOD PE=1 SV=1	1	20230315_zy_umod_t-after.13806.13806.3	controllerType=0 controllerNumber=1 scan=13806	50.4105
R.C[+57.021]NTAAPMWLN[+1768.640]GTHPSSDEGIVSR.K	HexNAc(4)Hex(5)Fuc(1)	C[+57], N[+1769]	1423.6	3	4268.78	4268.77	0	0.5	223	Specific	769.92	769.92	216.55	12.37	367	>sp|P07911|UROM_HUMAN Uromodulin OS=Homo sapiens OX=9606 GN=UMOD PE=1 SV=1	1	20230315_zy_umod_t-after.13813.13813.3	controllerType=0 controllerNumber=1 scan=13813	50.4401
R.C[+57.021]NTAAPMWLN[+1768.640]GTHPSSDEGIVSR.K	HexNAc(4)Hex(5)Fuc(1)	C[+57], N[+1769]	1067.95	4	4268.77	4268.77	0	-0.3	223	Specific	910.46	910.46	400.79	15.43	367	>sp|P07911|UROM_HUMAN Uromodulin OS=Homo sapiens OX=9606 GN=UMOD PE=1 SV=1	1	20230315_zy_umod_t-after.13816.13816.4	controllerType=0 controllerNumber=1 scan=13816	50.4494
R.C[+57.021]NTAAPM[+15.995]WLN[+2059.735]GTHPSSDEGIVSR.K	HexNAc(4)Hex(5)Fuc(1)NeuAc(1)	C[+57], M[+16], N[+2060]	1144.72	4	4575.87	4575.86	0	0.2	223	Specific	225.89	225.89	144.99	4.75	367	>sp|P07911|UROM_HUMAN Uromodulin OS=Homo sapiens OX=9606 GN=UMOD PE=1 SV=1	1	20230315_zy_umod_t-after.13366.13366.4	controllerType=0 controllerNumber=1 scan=13366	48.8009
R.C[+57.021]NTAAPM[+15.995]WLN[+2059.735]GTHPSSDEGIVSR.K	HexNAc(4)Hex(5)Fuc(1)NeuAc(1)	C[+57], M[+16], N[+2060]	1526.29	3	4576.86	4575.86	1	-2.3	223	Specific	238.33	238.33	65.9	4.76	367	>sp|P07911|UROM_HUMAN Uromodulin OS=Homo sapiens OX=9606 GN=UMOD PE=1 SV=1	1	20230315_zy_umod_t-after.13398.13398.3	controllerType=0 controllerNumber=1 scan=13398	48.9208
R.C[+57.021]NTAAPMWLN[+2059.735]GTHPSSDEGIVSR.K	HexNAc(4)Hex(5)Fuc(1)NeuAc(1)	C[+57], N[+2060]	1520.29	3	4558.87	4559.87	-1	0.1	223	Specific	241.73	241.73	241.73	4.87	367	>sp|P07911|UROM_HUMAN Uromodulin OS=Homo sapiens OX=9606 GN=UMOD PE=1 SV=1	1	20230315_zy_umod_t-after.19089.19089.4	controllerType=0 controllerNumber=1 scan=19089	69.058
R.C[+57.021]NTAAPMWLN[+2059.735]GTHPSSDEGIVSR.K	HexNAc(4)Hex(5)Fuc(1)NeuAc(1)	C[+57], N[+2060]	1520.29	3	4558.84	4559.87	-1	-4.6	223	Specific	256.88	256.88	256.88	4.87	367	>sp|P07911|UROM_HUMAN Uromodulin OS=Homo sapiens OX=9606 GN=UMOD PE=1 SV=1	1	20230315_zy_umod_t-after.17121.17121.3	controllerType=0 controllerNumber=1 scan=17121	62.4712
R.C[+57.021]NTAAPM[+15.995]WLN[+2059.735]GTHPSSDEGIVSR.K	HexNAc(4)Hex(5)Fuc(1)NeuAc(1)	C[+57], M[+16], N[+2060]	1144.47	4	4574.86	4575.86	-1	0.6	223	Specific	270.17	270.17	149.74	5	367	>sp|P07911|UROM_HUMAN Uromodulin OS=Homo sapiens OX=9606 GN=UMOD PE=1 SV=1	1	20230315_zy_umod_t-after.13466.13466.4	controllerType=0 controllerNumber=1 scan=13466	49.1646
R.C[+57.021]NTAAPM[+15.995]WLN[+2059.735]GTHPSSDEGIVSR.K	HexNAc(4)Hex(5)Fuc(1)NeuAc(1)	C[+57], M[+16], N[+2060]	1144.47	4	4574.86	4575.86	-1	-0.4	223	Specific	299.68	299.68	174.55	5.21	367	>sp|P07911|UROM_HUMAN Uromodulin OS=Homo sapiens OX=9606 GN=UMOD PE=1 SV=1	1	20230315_zy_umod_t-after.14307.14307.4	controllerType=0 controllerNumber=1 scan=14307	52.2578
R.C[+57.021]NTAAPMWLN[+2059.735]GTHPSSDEGIVSR.K	HexNAc(4)Hex(5)Fuc(1)NeuAc(1)	C[+57], N[+2060]	1520.29	3	4558.87	4559.87	-1	0.1	223	Specific	302.13	302.13	302.13	5.16	367	>sp|P07911|UROM_HUMAN Uromodulin OS=Homo sapiens OX=9606 GN=UMOD PE=1 SV=1	1	20230315_zy_umod_t-after.19084.19084.3	controllerType=0 controllerNumber=1 scan=19084	69.0505
R.C[+57.021]NTAAPM[+15.995]WLN[+2059.735]GTHPSSDEGIVSR.K	HexNAc(4)Hex(5)Fuc(1)NeuAc(1)	C[+57], M[+16], N[+2060]	1144.72	4	4575.87	4575.86	0	1.5	223	Specific	329.56	329.56	171.48	4.92	367	>sp|P07911|UROM_HUMAN Uromodulin OS=Homo sapiens OX=9606 GN=UMOD PE=1 SV=1	1	20230315_zy_umod_t-after.13551.13551.4	controllerType=0 controllerNumber=1 scan=13551	49.4746
R.C[+57.021]NTAAPM[+15.995]WLN[+2059.735]GTHPSSDEGIVSR.K	HexNAc(4)Hex(5)Fuc(1)NeuAc(1)	C[+57], M[+16], N[+2060]	1525.96	3	4575.86	4575.86	0	-0.4	223	Specific	342.47	274.95	104.88	5.12	367	>sp|P07911|UROM_HUMAN Uromodulin OS=Homo sapiens OX=9606 GN=UMOD PE=1 SV=1	1	20230315_zy_umod_t-after.13195.13195.3	controllerType=0 controllerNumber=1 scan=13195	48.1735
R.C[+57.021]NTAAPMWLN[+2059.735]GTHPSSDEGIVSR.K	HexNAc(4)Hex(5)Fuc(1)NeuAc(1)	C[+57], N[+2060]	1520.29	3	4558.85	4559.87	-1	-3	223	Specific	365.37	365.37	365.37	5.54	367	>sp|P07911|UROM_HUMAN Uromodulin OS=Homo sapiens OX=9606 GN=UMOD PE=1 SV=1	1	20230315_zy_umod_t-after.17091.17091.3	controllerType=0 controllerNumber=1 scan=17091	62.3699
R.C[+57.021]NTAAPMWLN[+2059.735]GTHPSSDEGIVSR.K	HexNAc(4)Hex(5)Fuc(1)NeuAc(1)	C[+57], N[+2060]	1520.63	3	4559.87	4559.87	0	1.1	223	Specific	383.15	383.15	383.15	6.39	367	>sp|P07911|UROM_HUMAN Uromodulin OS=Homo sapiens OX=9606 GN=UMOD PE=1 SV=1	1	20230315_zy_umod_t-after.18971.18971.3	controllerType=0 controllerNumber=1 scan=18971	68.731
R.C[+57.021]NTAAPMWLN[+2059.735]GTHPSSDEGIVSR.K	HexNAc(4)Hex(5)Fuc(1)NeuAc(1)	C[+57], N[+2060]	1520.63	3	4559.87	4559.87	0	1.1	223	Specific	395.72	395.72	395.72	6.39	367	>sp|P07911|UROM_HUMAN Uromodulin OS=Homo sapiens OX=9606 GN=UMOD PE=1 SV=1	1	20230315_zy_umod_t-after.19139.19139.3	controllerType=0 controllerNumber=1 scan=19139	69.2084
R.C[+57.021]NTAAPMWLN[+2059.735]GTHPSSDEGIVSR.K	HexNAc(4)Hex(5)Fuc(1)NeuAc(1)	C[+57], N[+2060]	1140.72	4	4559.87	4559.87	0	0.1	223	Specific	414.17	414.17	414.17	7	367	>sp|P07911|UROM_HUMAN Uromodulin OS=Homo sapiens OX=9606 GN=UMOD PE=1 SV=1	1	20230315_zy_umod_t-after.18980.18980.4	controllerType=0 controllerNumber=1 scan=18980	68.7477
R.C[+57.021]NTAAPMWLN[+2059.735]GTHPSSDEGIVSR.K	HexNAc(4)Hex(5)Fuc(1)NeuAc(1)	C[+57], N[+2060]	1520.63	3	4559.88	4559.87	0	1.8	223	Specific	415.59	374.89	374.89	6.3	367	>sp|P07911|UROM_HUMAN Uromodulin OS=Homo sapiens OX=9606 GN=UMOD PE=1 SV=1	1	20230315_zy_umod_t-after.19135.19135.3	controllerType=0 controllerNumber=1 scan=19135	69.1978
R.C[+57.021]NTAAPMWLN[+2059.735]GTHPSSDEGIVSR.K	HexNAc(4)Hex(5)Fuc(1)NeuAc(1)	C[+57], N[+2060]	1140.47	4	4558.85	4559.87	-1	-3.9	223	Specific	425.31	425.31	425.31	7	367	>sp|P07911|UROM_HUMAN Uromodulin OS=Homo sapiens OX=9606 GN=UMOD PE=1 SV=1	1	20230315_zy_umod_t-after.10542.10542.4	controllerType=0 controllerNumber=1 scan=10542	38.4798
R.C[+57.021]NTAAPMWLN[+2059.735]GTHPSSDEGIVSR.K	HexNAc(4)Hex(5)Fuc(1)NeuAc(1)	C[+57], N[+2060]	1520.63	3	4559.87	4559.87	0	0.6	223	Specific	432.79	432.79	432.79	6.95	367	>sp|P07911|UROM_HUMAN Uromodulin OS=Homo sapiens OX=9606 GN=UMOD PE=1 SV=1	1	20230315_zy_umod_t-after.18976.18976.3	controllerType=0 controllerNumber=1 scan=18976	68.7425
R.C[+57.021]NTAAPM[+15.995]WLN[+2059.735]GTHPSSDEGIVSR.K	HexNAc(4)Hex(5)Fuc(1)NeuAc(1)	C[+57], M[+16], N[+2060]	1525.96	3	4575.87	4575.86	0	1.8	223	Specific	471.86	456.46	128.92	6.45	367	>sp|P07911|UROM_HUMAN Uromodulin OS=Homo sapiens OX=9606 GN=UMOD PE=1 SV=1	1	20230315_zy_umod_t-after.13280.13280.3	controllerType=0 controllerNumber=1 scan=13280	48.4876
R.C[+57.021]NTAAPMWLN[+2059.735]GTHPSSDEGIVSR.K	HexNAc(4)Hex(5)Fuc(1)NeuAc(1)	C[+57], N[+2060]	1520.29	3	4558.85	4559.87	-1	-4.5	223	Specific	473.59	473.59	473.59	7.1	367	>sp|P07911|UROM_HUMAN Uromodulin OS=Homo sapiens OX=9606 GN=UMOD PE=1 SV=1	1	20230315_zy_umod_t-after.17180.17180.3	controllerType=0 controllerNumber=1 scan=17180	62.6803
R.C[+57.021]NTAAPM[+15.995]WLN[+2059.735]GTHPSSDEGIVSR.K	HexNAc(4)Hex(5)Fuc(1)NeuAc(1)	C[+57], M[+16], N[+2060]	1525.96	3	4575.85	4575.86	0	-2.4	223	Specific	505.23	491.98	121.19	7.19	367	>sp|P07911|UROM_HUMAN Uromodulin OS=Homo sapiens OX=9606 GN=UMOD PE=1 SV=1	1	20230315_zy_umod_t-after.13478.13478.3	controllerType=0 controllerNumber=1 scan=13478	49.2027
R.C[+57.021]NTAAPM[+15.995]WLN[+2059.735]GTHPSSDEGIVSR.K	HexNAc(4)Hex(5)Fuc(1)NeuAc(1)	C[+57], M[+16], N[+2060]	1525.96	3	4575.87	4575.86	0	2	223	Specific	514.66	514.66	64.55	6.54	367	>sp|P07911|UROM_HUMAN Uromodulin OS=Homo sapiens OX=9606 GN=UMOD PE=1 SV=1	1	20230315_zy_umod_t-after.14266.14266.3	controllerType=0 controllerNumber=1 scan=14266	52.1064
R.C[+57.021]NTAAPM[+15.995]WLN[+2059.735]GTHPSSDEGIVSR.K	HexNAc(4)Hex(5)Fuc(1)NeuAc(1)	C[+57], M[+16], N[+2060]	1144.72	4	4575.86	4575.86	0	-0.9	223	Specific	517.52	514.07	246.46	7.24	367	>sp|P07911|UROM_HUMAN Uromodulin OS=Homo sapiens OX=9606 GN=UMOD PE=1 SV=1	1	20230315_zy_umod_t-after.14251.14251.4	controllerType=0 controllerNumber=1 scan=14251	52.0522
R.C[+57.021]NTAAPMWLN[+2059.735]GTHPSSDEGIVSR.K	HexNAc(4)Hex(5)Fuc(1)NeuAc(1)	C[+57], N[+2060]	1520.29	3	4558.84	4559.87	-1	-5.3	223	Specific	534.99	534.99	534.99	7.36	367	>sp|P07911|UROM_HUMAN Uromodulin OS=Homo sapiens OX=9606 GN=UMOD PE=1 SV=1	1	20230315_zy_umod_t-after.17158.17158.3	controllerType=0 controllerNumber=1 scan=17158	62.6053
R.C[+57.021]NTAAPMWLN[+2059.735]GTHPSSDEGIVSR.K	HexNAc(4)Hex(5)Fuc(1)NeuAc(1)	C[+57], N[+2060]	1520.63	3	4559.88	4559.87	0	1.9	223	Specific	536.28	499.61	499.61	6.71	367	>sp|P07911|UROM_HUMAN Uromodulin OS=Homo sapiens OX=9606 GN=UMOD PE=1 SV=1	1	20230315_zy_umod_t-after.15309.15309.3	controllerType=0 controllerNumber=1 scan=15309	55.9685
R.C[+57.021]NTAAPMWLN[+2059.735]GTHPSSDEGIVSR.K	HexNAc(4)Hex(5)Fuc(1)NeuAc(1)	C[+57], N[+2060]	1520.63	3	4559.88	4559.87	0	1.8	223	Specific	572.95	526.23	526.23	7.73	367	>sp|P07911|UROM_HUMAN Uromodulin OS=Homo sapiens OX=9606 GN=UMOD PE=1 SV=1	1	20230315_zy_umod_t-after.15427.15427.3	controllerType=0 controllerNumber=1 scan=15427	56.376
R.C[+57.021]NTAAPM[+15.995]WLN[+2059.735]GTHPSSDEGIVSR.K	HexNAc(4)Hex(5)Fuc(1)NeuAc(1)	C[+57], M[+16], N[+2060]	1525.62	3	4574.86	4575.86	-1	-0.9	223	Specific	585.02	585.02	77.75	8.37	367	>sp|P07911|UROM_HUMAN Uromodulin OS=Homo sapiens OX=9606 GN=UMOD PE=1 SV=1	1	20230315_zy_umod_t-after.13446.13446.3	controllerType=0 controllerNumber=1 scan=13446	49.092
R.C[+57.021]NTAAPM[+15.995]WLN[+2059.735]GTHPSSDEGIVSR.K	HexNAc(4)Hex(5)Fuc(1)NeuAc(1)	C[+57], M[+16], N[+2060]	1525.63	3	4574.86	4575.86	-1	-0.1	223	Specific	603.81	603.81	84.07	9.37	367	>sp|P07911|UROM_HUMAN Uromodulin OS=Homo sapiens OX=9606 GN=UMOD PE=1 SV=1	1	20230315_zy_umod_t-after.13531.13531.3	controllerType=0 controllerNumber=1 scan=13531	49.4021
R.C[+57.021]NTAAPM[+15.995]WLN[+2059.735]GTHPSSDEGIVSR.K	HexNAc(4)Hex(5)Fuc(1)NeuAc(1)	C[+57], M[+16], N[+2060]	1525.63	3	4574.87	4575.86	-1	2.3	223	Specific	607.55	607.55	139.81	8.49	367	>sp|P07911|UROM_HUMAN Uromodulin OS=Homo sapiens OX=9606 GN=UMOD PE=1 SV=1	1	20230315_zy_umod_t-after.13315.13315.3	controllerType=0 controllerNumber=1 scan=13315	48.6232
R.C[+57.021]NTAAPM[+15.995]WLN[+2059.735]GTHPSSDEGIVSR.K	HexNAc(4)Hex(5)Fuc(1)NeuAc(1)	C[+57], M[+16], N[+2060]	1525.96	3	4575.85	4575.86	0	-2.4	223	Specific	615.07	615.07	123.12	9.37	367	>sp|P07911|UROM_HUMAN Uromodulin OS=Homo sapiens OX=9606 GN=UMOD PE=1 SV=1	1	20230315_zy_umod_t-after.13375.13375.3	controllerType=0 controllerNumber=1 scan=13375	48.8366
R.C[+57.021]NTAAPM[+15.995]WLN[+2059.735]GTHPSSDEGIVSR.K	HexNAc(4)Hex(5)Fuc(1)NeuAc(1)	C[+57], M[+16], N[+2060]	1144.73	4	4575.88	4575.86	0	3.5	223	Specific	645.42	645.42	95.31	8.37	367	>sp|P07911|UROM_HUMAN Uromodulin OS=Homo sapiens OX=9606 GN=UMOD PE=1 SV=1	1	20230315_zy_umod_t-after.15338.15338.4	controllerType=0 controllerNumber=1 scan=15338	56.0672
R.C[+57.021]NTAAPM[+15.995]WLN[+2059.735]GTHPSSDEGIVSR.K	HexNAc(4)Hex(5)Fuc(1)NeuAc(1)	C[+57], M[+16], N[+2060]	1525.96	3	4575.88	4575.86	0	2.4	223	Specific	675.52	656.5	161.91	9.49	367	>sp|P07911|UROM_HUMAN Uromodulin OS=Homo sapiens OX=9606 GN=UMOD PE=1 SV=1	1	20230315_zy_umod_t-after.13216.13216.3	controllerType=0 controllerNumber=1 scan=13216	48.2547
R.C[+57.021]NTAAPM[+15.995]WLN[+2059.735]GTHPSSDEGIVSR.K	HexNAc(4)Hex(5)Fuc(1)NeuAc(1)	C[+57], M[+16], N[+2060]	1144.72	4	4575.85	4575.86	0	-2.9	223	Specific	683.93	668.25	316.61	10.43	367	>sp|P07911|UROM_HUMAN Uromodulin OS=Homo sapiens OX=9606 GN=UMOD PE=1 SV=1	1	20230315_zy_umod_t-after.13448.13448.4	controllerType=0 controllerNumber=1 scan=13448	49.0978
R.C[+57.021]NTAAPM[+15.995]WLN[+2059.735]GTHPSSDEGIVSR.K	HexNAc(4)Hex(5)Fuc(1)NeuAc(1)	C[+57], M[+16], N[+2060]	1144.47	4	4574.86	4575.86	-1	-0.7	223	Specific	685.04	685.04	258.36	10.43	367	>sp|P07911|UROM_HUMAN Uromodulin OS=Homo sapiens OX=9606 GN=UMOD PE=1 SV=1	1	20230315_zy_umod_t-after.13547.13547.4	controllerType=0 controllerNumber=1 scan=13547	49.4601
R.C[+57.021]NTAAPMWLN[+2059.735]GTHPSSDEGIVSR.K	HexNAc(4)Hex(5)Fuc(1)NeuAc(1)	C[+57], N[+2060]	1520.63	3	4559.88	4559.87	0	1.5	223	Specific	721.59	716.64	716.64	10.73	367	>sp|P07911|UROM_HUMAN Uromodulin OS=Homo sapiens OX=9606 GN=UMOD PE=1 SV=1	1	20230315_zy_umod_t-after.15555.15555.3	controllerType=0 controllerNumber=1 scan=15555	56.8213
R.C[+57.021]NTAAPMWLN[+2059.735]GTHPSSDEGIVSR.K	HexNAc(4)Hex(5)Fuc(1)NeuAc(1)	C[+57], N[+2060]	1520.63	3	4559.88	4559.87	0	1.5	223	Specific	755.41	755.41	755.41	11.73	367	>sp|P07911|UROM_HUMAN Uromodulin OS=Homo sapiens OX=9606 GN=UMOD PE=1 SV=1	1	20230315_zy_umod_t-after.15404.15404.3	controllerType=0 controllerNumber=1 scan=15404	56.3027
R.C[+57.021]NTAAPM[+15.995]WLN[+2059.735]GTHPSSDEGIVSR.K	HexNAc(4)Hex(5)Fuc(1)NeuAc(1)	C[+57], M[+16], N[+2060]	1144.72	4	4575.86	4575.86	0	-1.1	223	Specific	756.23	756.23	309.82	12.43	367	>sp|P07911|UROM_HUMAN Uromodulin OS=Homo sapiens OX=9606 GN=UMOD PE=1 SV=1	1	20230315_zy_umod_t-after.13274.13274.4	controllerType=0 controllerNumber=1 scan=13274	48.4691
R.C[+57.021]NTAAPM[+15.995]WLN[+2059.735]GTHPSSDEGIVSR.K	HexNAc(4)Hex(5)Fuc(1)NeuAc(1)	C[+57], M[+16], N[+2060]	1144.72	4	4575.87	4575.86	0	0.3	223	Specific	765.48	765.48	311.68	12.43	367	>sp|P07911|UROM_HUMAN Uromodulin OS=Homo sapiens OX=9606 GN=UMOD PE=1 SV=1	1	20230315_zy_umod_t-after.13192.13192.4	controllerType=0 controllerNumber=1 scan=13192	48.1637
R.C[+57.021]NTAAPMWLN[+2059.735]GTHPSSDEGIVSR.K	HexNAc(4)Hex(5)Fuc(1)NeuAc(1)	C[+57], N[+2060]	1520.29	3	4558.87	4559.87	-1	0.7	223	Specific	782.16	782.16	782.16	12.37	367	>sp|P07911|UROM_HUMAN Uromodulin OS=Homo sapiens OX=9606 GN=UMOD PE=1 SV=1	1	20230315_zy_umod_t-after.15733.15733.3	controllerType=0 controllerNumber=1 scan=15733	57.4552
R.C[+57.021]NTAAPMWLN[+2059.735]GTHPSSDEGIVSR.K	HexNAc(4)Hex(5)Fuc(1)NeuAc(1)	C[+57], N[+2060]	1520.63	3	4559.88	4559.87	0	1.4	223	Specific	789.86	789.86	789.86	11.88	367	>sp|P07911|UROM_HUMAN Uromodulin OS=Homo sapiens OX=9606 GN=UMOD PE=1 SV=1	1	20230315_zy_umod_t-after.15494.15494.3	controllerType=0 controllerNumber=1 scan=15494	56.6141
R.C[+57.021]NTAAPMWLN[+2059.735]GTHPSSDEGIVSR.K	HexNAc(4)Hex(5)Fuc(1)NeuAc(1)	C[+57], N[+2060]	1520.63	3	4559.88	4559.87	0	1.5	223	Specific	814.35	814.35	814.35	12.73	367	>sp|P07911|UROM_HUMAN Uromodulin OS=Homo sapiens OX=9606 GN=UMOD PE=1 SV=1	1	20230315_zy_umod_t-after.15613.15613.3	controllerType=0 controllerNumber=1 scan=15613	57.0336
R.C[+57.021]NTAAPMWLN[+2059.735]GTHPSSDEGIVSR.K	HexNAc(4)Hex(5)Fuc(1)NeuAc(1)	C[+57], N[+2060]	1520.63	3	4559.88	4559.87	0	1.5	223	Specific	814.91	814.91	814.91	12.73	367	>sp|P07911|UROM_HUMAN Uromodulin OS=Homo sapiens OX=9606 GN=UMOD PE=1 SV=1	1	20230315_zy_umod_t-after.15318.15318.3	controllerType=0 controllerNumber=1 scan=15318	55.9985
R.C[+57.021]NTAAPMWLN[+2059.735]GTHPSSDEGIVSR.K	HexNAc(4)Hex(5)Fuc(1)NeuAc(1)	C[+57], N[+2060]	1140.72	4	4559.88	4559.87	0	1.4	223	Specific	864.63	864.63	864.63	13.78	367	>sp|P07911|UROM_HUMAN Uromodulin OS=Homo sapiens OX=9606 GN=UMOD PE=1 SV=1	1	20230315_zy_umod_t-after.15516.15516.4	controllerType=0 controllerNumber=1 scan=15516	56.6813
R.C[+57.021]NTAAPMWLN[+2059.735]GTHPSSDEGIVSR.K	HexNAc(4)Hex(5)Fuc(1)NeuAc(1)	C[+57], N[+2060]	1140.72	4	4559.87	4559.87	0	-0.3	223	Specific	912.95	912.95	912.95	15.43	367	>sp|P07911|UROM_HUMAN Uromodulin OS=Homo sapiens OX=9606 GN=UMOD PE=1 SV=1	1	20230315_zy_umod_t-after.15465.15465.4	controllerType=0 controllerNumber=1 scan=15465	56.5128
R.C[+57.021]NTAAPMWLN[+2059.735]GTHPSSDEGIVSR.K	HexNAc(4)Hex(5)Fuc(1)NeuAc(1)	C[+57], N[+2060]	1140.72	4	4559.87	4559.87	0	0.1	223	Specific	921.57	921.57	921.57	15.43	367	>sp|P07911|UROM_HUMAN Uromodulin OS=Homo sapiens OX=9606 GN=UMOD PE=1 SV=1	1	20230315_zy_umod_t-after.15671.15671.4	controllerType=0 controllerNumber=1 scan=15671	57.2386
R.C[+57.021]NTAAPMWLN[+2059.735]GTHPSSDEGIVSR.K	HexNAc(4)Hex(5)Fuc(1)NeuAc(1)	C[+57], N[+2060]	1140.72	4	4559.87	4559.87	0	0.6	223	Specific	933.93	933.93	933.93	15.43	367	>sp|P07911|UROM_HUMAN Uromodulin OS=Homo sapiens OX=9606 GN=UMOD PE=1 SV=1	1	20230315_zy_umod_t-after.15329.15329.4	controllerType=0 controllerNumber=1 scan=15329	56.0399
R.C[+57.021]NTAAPMWLN[+2059.735]GTHPSSDEGIVSR.K	HexNAc(4)Hex(5)Fuc(1)NeuAc(1)	C[+57], N[+2060]	1140.72	4	4559.88	4559.87	0	1.4	223	Specific	958.31	949.07	949.07	15.78	367	>sp|P07911|UROM_HUMAN Uromodulin OS=Homo sapiens OX=9606 GN=UMOD PE=1 SV=1	1	20230315_zy_umod_t-after.15695.15695.4	controllerType=0 controllerNumber=1 scan=15695	57.3191
R.C[+57.021]NTAAPM[+15.995]WLN[+2350.830]GTHPSSDEGIVSR.K	HexNAc(4)Hex(5)Fuc(1)NeuAc(2)	C[+57], M[+16], N[+2351]	1622.99	3	4866.95	4866.96	0	-1	223	Specific	210.07	210.07	210.07	4.69	367	>sp|P07911|UROM_HUMAN Uromodulin OS=Homo sapiens OX=9606 GN=UMOD PE=1 SV=1	1	20230315_zy_umod_t-after.14691.14691.3	controllerType=0 controllerNumber=1 scan=14691	53.6979
R.C[+57.021]NTAAPMWLN[+2350.830]GTHPSSDEGIVSR.K	HexNAc(4)Hex(5)Fuc(1)NeuAc(2)	C[+57], N[+2351]	1617.32	3	4849.94	4850.96	-1	-4.5	223	Specific	275.37	275.37	21.71	4.95	367	>sp|P07911|UROM_HUMAN Uromodulin OS=Homo sapiens OX=9606 GN=UMOD PE=1 SV=1	1	20230315_zy_umod_t-after.18597.18597.3	controllerType=0 controllerNumber=1 scan=18597	67.5849
R.C[+57.021]NTAAPMWLN[+2350.830]GTHPSSDEGIVSR.K	HexNAc(4)Hex(5)Fuc(1)NeuAc(2)	C[+57], N[+2351]	1617.66	3	4850.96	4850.96	0	-0.5	223	Specific	276.81	276.81	276.81	4.95	367	>sp|P07911|UROM_HUMAN Uromodulin OS=Homo sapiens OX=9606 GN=UMOD PE=1 SV=1	1	20230315_zy_umod_t-after.19655.19655.3	controllerType=0 controllerNumber=1 scan=19655	70.8278
R.C[+57.021]NTAAPM[+15.995]WLN[+2350.830]GTHPSSDEGIVSR.K	HexNAc(4)Hex(5)Fuc(1)NeuAc(2)	C[+57], M[+16], N[+2351]	1622.99	3	4866.97	4866.96	0	1.8	223	Specific	285.84	285.84	285.84	4.42	367	>sp|P07911|UROM_HUMAN Uromodulin OS=Homo sapiens OX=9606 GN=UMOD PE=1 SV=1	1	20230315_zy_umod_t-after.14980.14980.3	controllerType=0 controllerNumber=1 scan=14980	54.7676
R.C[+57.021]NTAAPM[+15.995]WLN[+2350.830]GTHPSSDEGIVSR.K	HexNAc(4)Hex(5)Fuc(1)NeuAc(2)	C[+57], M[+16], N[+2351]	1217.49	4	4866.95	4866.96	0	-1.6	223	Specific	338.35	338.35	338.35	5.41	367	>sp|P07911|UROM_HUMAN Uromodulin OS=Homo sapiens OX=9606 GN=UMOD PE=1 SV=1	1	20230315_zy_umod_t-after.18461.18461.4	controllerType=0 controllerNumber=1 scan=18461	67.1448
R.C[+57.021]NTAAPM[+15.995]WLN[+2350.830]GTHPSSDEGIVSR.K	HexNAc(4)Hex(5)Fuc(1)NeuAc(2)	C[+57], M[+16], N[+2351]	1217.5	4	4866.96	4866.96	0	-0.1	223	Specific	389.4	389.4	389.4	6.93	367	>sp|P07911|UROM_HUMAN Uromodulin OS=Homo sapiens OX=9606 GN=UMOD PE=1 SV=1	1	20230315_zy_umod_t-after.16125.16125.4	controllerType=0 controllerNumber=1 scan=16125	58.8431
R.C[+57.021]NTAAPM[+15.995]WLN[+2350.830]GTHPSSDEGIVSR.K	HexNAc(4)Hex(5)Fuc(1)NeuAc(2)	C[+57], M[+16], N[+2351]	1217.5	4	4866.96	4866.96	0	0.1	223	Specific	409.76	409.76	409.76	7	367	>sp|P07911|UROM_HUMAN Uromodulin OS=Homo sapiens OX=9606 GN=UMOD PE=1 SV=1	1	20230315_zy_umod_t-after.15051.15051.4	controllerType=0 controllerNumber=1 scan=15051	55.0399
R.C[+57.021]NTAAPM[+15.995]WLN[+2350.830]GTHPSSDEGIVSR.K	HexNAc(4)Hex(5)Fuc(1)NeuAc(2)	C[+57], M[+16], N[+2351]	1622.67	3	4865.99	4866.96	-1	6.2	223	Specific	415.79	361.9	361.9	4	367	>sp|P07911|UROM_HUMAN Uromodulin OS=Homo sapiens OX=9606 GN=UMOD PE=1 SV=1	1	20230315_zy_umod_t-after.14629.14629.3	controllerType=0 controllerNumber=1 scan=14629	53.4664
R.C[+57.021]NTAAPM[+15.995]WLN[+2350.830]GTHPSSDEGIVSR.K	HexNAc(4)Hex(5)Fuc(1)NeuAc(2)	C[+57], M[+16], N[+2351]	1623.33	3	4867.98	4866.96	1	3.6	223	Specific	451.18	451.18	159.56	6.04	367	>sp|P07911|UROM_HUMAN Uromodulin OS=Homo sapiens OX=9606 GN=UMOD PE=1 SV=1	1	20230315_zy_umod_t-after.14737.14737.3	controllerType=0 controllerNumber=1 scan=14737	53.866
R.C[+57.021]NTAAPM[+15.995]WLN[+2350.830]GTHPSSDEGIVSR.K	HexNAc(4)Hex(5)Fuc(1)NeuAc(2)	C[+57], M[+16], N[+2351]	1217.75	4	4867.99	4866.96	1	5.4	223	Specific	452.11	452.11	73.2	5.96	367	>sp|P07911|UROM_HUMAN Uromodulin OS=Homo sapiens OX=9606 GN=UMOD PE=1 SV=1	1	20230315_zy_umod_t-after.17281.17281.4	controllerType=0 controllerNumber=1 scan=17281	63.0289
R.C[+57.021]NTAAPMWLN[+2350.830]GTHPSSDEGIVSR.K	HexNAc(4)Hex(5)Fuc(1)NeuAc(2)	C[+57], N[+2351]	1213.74	4	4851.95	4850.96	1	-2.8	223	Specific	466.85	466.85	41.26	7.15	367	>sp|P07911|UROM_HUMAN Uromodulin OS=Homo sapiens OX=9606 GN=UMOD PE=1 SV=1	1	20230315_zy_umod_t-after.17704.17704.4	controllerType=0 controllerNumber=1 scan=17704	64.5194
R.C[+57.021]NTAAPMWLN[+2350.830]GTHPSSDEGIVSR.K	HexNAc(4)Hex(5)Fuc(1)NeuAc(2)	C[+57], N[+2351]	1617.33	3	4849.96	4850.96	-1	-0.2	223	Specific	469.36	469.36	469.36	7.1	367	>sp|P07911|UROM_HUMAN Uromodulin OS=Homo sapiens OX=9606 GN=UMOD PE=1 SV=1	1	20230315_zy_umod_t-after.18408.18408.3	controllerType=0 controllerNumber=1 scan=18408	66.9657
R.C[+57.021]NTAAPM[+15.995]WLN[+2350.830]GTHPSSDEGIVSR.K	HexNAc(4)Hex(5)Fuc(1)NeuAc(2)	C[+57], M[+16], N[+2351]	1622.99	3	4866.95	4866.96	0	-1	223	Specific	483.02	483.02	483.02	7.19	367	>sp|P07911|UROM_HUMAN Uromodulin OS=Homo sapiens OX=9606 GN=UMOD PE=1 SV=1	1	20230315_zy_umod_t-after.14697.14697.4	controllerType=0 controllerNumber=1 scan=14697	53.7173
R.C[+57.021]NTAAPMWLN[+2350.830]GTHPSSDEGIVSR.K	HexNAc(4)Hex(5)Fuc(1)NeuAc(2)	C[+57], N[+2351]	1617.66	3	4850.97	4850.96	0	0.1	223	Specific	483.44	483.44	483.44	7.19	367	>sp|P07911|UROM_HUMAN Uromodulin OS=Homo sapiens OX=9606 GN=UMOD PE=1 SV=1	1	20230315_zy_umod_t-after.19816.19816.3	controllerType=0 controllerNumber=1 scan=19816	71.3326
R.C[+57.021]NTAAPMWLN[+2350.830]GTHPSSDEGIVSR.K	HexNAc(4)Hex(5)Fuc(1)NeuAc(2)	C[+57], N[+2351]	1617.32	3	4849.94	4850.96	-1	-4.6	223	Specific	486.71	486.71	26.06	7.19	367	>sp|P07911|UROM_HUMAN Uromodulin OS=Homo sapiens OX=9606 GN=UMOD PE=1 SV=1	1	20230315_zy_umod_t-after.18436.18436.3	controllerType=0 controllerNumber=1 scan=18436	67.0483
R.C[+57.021]NTAAPMWLN[+2350.830]GTHPSSDEGIVSR.K	HexNAc(4)Hex(5)Fuc(1)NeuAc(2)	C[+57], N[+2351]	1213.24	4	4849.94	4850.96	-1	-5.1	223	Specific	496.13	496.13	21.11	7.24	367	>sp|P07911|UROM_HUMAN Uromodulin OS=Homo sapiens OX=9606 GN=UMOD PE=1 SV=1	1	20230315_zy_umod_t-after.18422.18422.4	controllerType=0 controllerNumber=1 scan=18422	66.9991
R.C[+57.021]NTAAPM[+15.995]WLN[+2350.830]GTHPSSDEGIVSR.K	HexNAc(4)Hex(5)Fuc(1)NeuAc(2)	C[+57], M[+16], N[+2351]	1622.65	3	4865.93	4866.96	-1	-5.4	223	Specific	536.28	536.28	120.74	7.36	367	>sp|P07911|UROM_HUMAN Uromodulin OS=Homo sapiens OX=9606 GN=UMOD PE=1 SV=1	1	20230315_zy_umod_t-after.15029.15029.3	controllerType=0 controllerNumber=1 scan=15029	54.9599
R.C[+57.021]NTAAPM[+15.995]WLN[+2350.830]GTHPSSDEGIVSR.K	HexNAc(4)Hex(5)Fuc(1)NeuAc(2)	C[+57], M[+16], N[+2351]	1217.5	4	4866.96	4866.96	0	0.6	223	Specific	541.98	541.98	541.98	7.41	367	>sp|P07911|UROM_HUMAN Uromodulin OS=Homo sapiens OX=9606 GN=UMOD PE=1 SV=1	1	20230315_zy_umod_t-after.14967.14967.4	controllerType=0 controllerNumber=1 scan=14967	54.7193
R.C[+57.021]NTAAPMWLN[+2350.830]GTHPSSDEGIVSR.K	HexNAc(4)Hex(5)Fuc(1)NeuAc(2)	C[+57], N[+2351]	1213.5	4	4850.97	4850.96	0	0.2	223	Specific	542.93	542.93	542.93	7.41	367	>sp|P07911|UROM_HUMAN Uromodulin OS=Homo sapiens OX=9606 GN=UMOD PE=1 SV=1	1	20230315_zy_umod_t-after.19725.19725.4	controllerType=0 controllerNumber=1 scan=19725	71.0441
R.C[+57.021]NTAAPMWLN[+2350.830]GTHPSSDEGIVSR.K	HexNAc(4)Hex(5)Fuc(1)NeuAc(2)	C[+57], N[+2351]	1617.32	3	4849.95	4850.96	-1	-3	223	Specific	557.87	557.87	109.08	7.36	367	>sp|P07911|UROM_HUMAN Uromodulin OS=Homo sapiens OX=9606 GN=UMOD PE=1 SV=1	1	20230315_zy_umod_t-after.18527.18527.3	controllerType=0 controllerNumber=1 scan=18527	67.358
R.C[+57.021]NTAAPM[+15.995]WLN[+2350.830]GTHPSSDEGIVSR.K	HexNAc(4)Hex(5)Fuc(1)NeuAc(2)	C[+57], M[+16], N[+2351]	1217.5	4	4866.96	4866.96	0	0.9	223	Specific	558.46	558.46	558.46	6.92	367	>sp|P07911|UROM_HUMAN Uromodulin OS=Homo sapiens OX=9606 GN=UMOD PE=1 SV=1	1	20230315_zy_umod_t-after.15991.15991.4	controllerType=0 controllerNumber=1 scan=15991	58.3557
R.C[+57.021]NTAAPMWLN[+2350.830]GTHPSSDEGIVSR.K	HexNAc(4)Hex(5)Fuc(1)NeuAc(2)	C[+57], N[+2351]	1213.5	4	4850.97	4850.96	0	2	223	Specific	596.96	596.96	596.96	7.78	367	>sp|P07911|UROM_HUMAN Uromodulin OS=Homo sapiens OX=9606 GN=UMOD PE=1 SV=1	1	20230315_zy_umod_t-after.17108.17108.4	controllerType=0 controllerNumber=1 scan=17108	62.4325
R.C[+57.021]NTAAPMWLN[+2350.830]GTHPSSDEGIVSR.K	HexNAc(4)Hex(5)Fuc(1)NeuAc(2)	C[+57], N[+2351]	1617.32	3	4849.94	4850.96	-1	-4	223	Specific	607.84	607.84	104.6	9.37	367	>sp|P07911|UROM_HUMAN Uromodulin OS=Homo sapiens OX=9606 GN=UMOD PE=1 SV=1	1	20230315_zy_umod_t-after.18430.18430.3	controllerType=0 controllerNumber=1 scan=18430	67.033
R.C[+57.021]NTAAPMWLN[+2350.830]GTHPSSDEGIVSR.K	HexNAc(4)Hex(5)Fuc(1)NeuAc(2)	C[+57], N[+2351]	1213.5	4	4850.96	4850.96	0	-0.4	223	Specific	648.49	648.49	648.49	9.43	367	>sp|P07911|UROM_HUMAN Uromodulin OS=Homo sapiens OX=9606 GN=UMOD PE=1 SV=1	1	20230315_zy_umod_t-after.16986.16986.3	controllerType=0 controllerNumber=1 scan=16986	62.008
R.C[+57.021]NTAAPM[+15.995]WLN[+2350.830]GTHPSSDEGIVSR.K	HexNAc(4)Hex(5)Fuc(1)NeuAc(2)	C[+57], M[+16], N[+2351]	1217.5	4	4866.97	4866.96	0	2.1	223	Specific	652.96	652.96	652.96	9.55	367	>sp|P07911|UROM_HUMAN Uromodulin OS=Homo sapiens OX=9606 GN=UMOD PE=1 SV=1	1	20230315_zy_umod_t-after.17018.17018.4	controllerType=0 controllerNumber=1 scan=17018	62.1212
R.C[+57.021]NTAAPM[+15.995]WLN[+2350.830]GTHPSSDEGIVSR.K	HexNAc(4)Hex(5)Fuc(1)NeuAc(2)	C[+57], M[+16], N[+2351]	1622.99	3	4866.96	4866.96	0	-0.2	223	Specific	669.33	669.33	669.33	10.37	367	>sp|P07911|UROM_HUMAN Uromodulin OS=Homo sapiens OX=9606 GN=UMOD PE=1 SV=1	1	20230315_zy_umod_t-after.14862.14862.3	controllerType=0 controllerNumber=1 scan=14862	54.332
R.C[+57.021]NTAAPM[+15.995]WLN[+2350.830]GTHPSSDEGIVSR.K	HexNAc(4)Hex(5)Fuc(1)NeuAc(2)	C[+57], M[+16], N[+2351]	1622.99	3	4866.96	4866.96	0	1.1	223	Specific	675.68	675.68	675.68	9.88	367	>sp|P07911|UROM_HUMAN Uromodulin OS=Homo sapiens OX=9606 GN=UMOD PE=1 SV=1	1	20230315_zy_umod_t-after.14778.14778.3	controllerType=0 controllerNumber=1 scan=14778	54.0201
R.C[+57.021]NTAAPM[+15.995]WLN[+2350.830]GTHPSSDEGIVSR.K	HexNAc(4)Hex(5)Fuc(1)NeuAc(2)	C[+57], M[+16], N[+2351]	1217.5	4	4866.97	4866.96	0	1.6	223	Specific	714.56	714.56	714.56	10.78	367	>sp|P07911|UROM_HUMAN Uromodulin OS=Homo sapiens OX=9606 GN=UMOD PE=1 SV=1	1	20230315_zy_umod_t-after.14876.14876.4	controllerType=0 controllerNumber=1 scan=14876	54.3841
R.C[+57.021]NTAAPM[+15.995]WLN[+2350.830]GTHPSSDEGIVSR.K	HexNAc(4)Hex(5)Fuc(1)NeuAc(2)	C[+57], M[+16], N[+2351]	1217.5	4	4866.96	4866.96	0	0	223	Specific	721.42	721.42	721.42	11.43	367	>sp|P07911|UROM_HUMAN Uromodulin OS=Homo sapiens OX=9606 GN=UMOD PE=1 SV=1	1	20230315_zy_umod_t-after.14987.14987.4	controllerType=0 controllerNumber=1 scan=14987	54.7992
R.C[+57.021]NTAAPM[+15.995]WLN[+2350.830]GTHPSSDEGIVSR.K	HexNAc(4)Hex(5)Fuc(1)NeuAc(2)	C[+57], M[+16], N[+2351]	1217.5	4	4866.96	4866.96	0	0.8	223	Specific	752.6	752.6	752.6	12.43	367	>sp|P07911|UROM_HUMAN Uromodulin OS=Homo sapiens OX=9606 GN=UMOD PE=1 SV=1	1	20230315_zy_umod_t-after.14974.14974.4	controllerType=0 controllerNumber=1 scan=14974	54.7493
R.C[+57.021]NTAAPM[+15.995]WLN[+2350.830]GTHPSSDEGIVSR.K	HexNAc(4)Hex(5)Fuc(1)NeuAc(2)	C[+57], M[+16], N[+2351]	1217.5	4	4866.96	4866.96	0	0.8	223	Specific	757.97	757.97	757.97	12.43	367	>sp|P07911|UROM_HUMAN Uromodulin OS=Homo sapiens OX=9606 GN=UMOD PE=1 SV=1	1	20230315_zy_umod_t-after.14853.14853.4	controllerType=0 controllerNumber=1 scan=14853	54.2941
R.C[+57.021]NTAAPM[+15.995]WLN[+2350.830]GTHPSSDEGIVSR.K	HexNAc(4)Hex(5)Fuc(1)NeuAc(2)	C[+57], M[+16], N[+2351]	1217.5	4	4866.96	4866.96	0	1	223	Specific	764.4	764.4	764.4	11.93	367	>sp|P07911|UROM_HUMAN Uromodulin OS=Homo sapiens OX=9606 GN=UMOD PE=1 SV=1	1	20230315_zy_umod_t-after.14792.14792.4	controllerType=0 controllerNumber=1 scan=14792	54.0714
R.C[+57.021]NTAAPMWLN[+2350.830]GTHPSSDEGIVSR.K	HexNAc(4)Hex(5)Fuc(1)NeuAc(2)	C[+57], N[+2351]	1213.5	4	4850.97	4850.96	0	0.8	223	Specific	765.67	765.67	765.67	12.43	367	>sp|P07911|UROM_HUMAN Uromodulin OS=Homo sapiens OX=9606 GN=UMOD PE=1 SV=1	1	20230315_zy_umod_t-after.17033.17033.3	controllerType=0 controllerNumber=1 scan=17033	62.1719
R.C[+57.021]NTAAPMWLN[+2350.830]GTHPSSDEGIVSR.K	HexNAc(4)Hex(5)Fuc(1)NeuAc(2)	C[+57], N[+2351]	1213.5	4	4850.97	4850.96	0	0.7	223	Specific	769.98	769.98	769.98	12.43	367	>sp|P07911|UROM_HUMAN Uromodulin OS=Homo sapiens OX=9606 GN=UMOD PE=1 SV=1	1	20230315_zy_umod_t-after.17008.17008.3	controllerType=0 controllerNumber=1 scan=17008	62.0893
R.C[+57.021]NTAAPMWLN[+2350.830]GTHPSSDEGIVSR.K	HexNAc(4)Hex(5)Fuc(1)NeuAc(2)	C[+57], N[+2351]	1213.5	4	4850.96	4850.96	0	-1.2	223	Specific	776.74	776.74	776.74	12.43	367	>sp|P07911|UROM_HUMAN Uromodulin OS=Homo sapiens OX=9606 GN=UMOD PE=1 SV=1	1	20230315_zy_umod_t-after.17432.17432.4	controllerType=0 controllerNumber=1 scan=17432	63.561
R.C[+57.021]NTAAPMWLN[+2350.830]GTHPSSDEGIVSR.K	HexNAc(4)Hex(5)Fuc(1)NeuAc(2)	C[+57], N[+2351]	1213.5	4	4850.97	4850.96	0	0.8	223	Specific	788.5	788.5	788.5	12.43	367	>sp|P07911|UROM_HUMAN Uromodulin OS=Homo sapiens OX=9606 GN=UMOD PE=1 SV=1	1	20230315_zy_umod_t-after.17425.17425.4	controllerType=0 controllerNumber=1 scan=17425	63.5392
R.C[+57.021]NTAAPM[+15.995]WLN[+2350.830]GTHPSSDEGIVSR.K	HexNAc(4)Hex(5)Fuc(1)NeuAc(2)	C[+57], M[+16], N[+2351]	1217.5	4	4866.97	4866.96	0	1.1	223	Specific	798.36	798.36	798.36	11.93	367	>sp|P07911|UROM_HUMAN Uromodulin OS=Homo sapiens OX=9606 GN=UMOD PE=1 SV=1	1	20230315_zy_umod_t-after.14770.14770.4	controllerType=0 controllerNumber=1 scan=14770	53.9841
R.C[+57.021]NTAAPM[+15.995]WLN[+2350.830]GTHPSSDEGIVSR.K	HexNAc(4)Hex(5)Fuc(1)NeuAc(2)	C[+57], M[+16], N[+2351]	1217.5	4	4866.96	4866.96	0	0.7	223	Specific	812.58	812.58	812.58	13.43	367	>sp|P07911|UROM_HUMAN Uromodulin OS=Homo sapiens OX=9606 GN=UMOD PE=1 SV=1	1	20230315_zy_umod_t-after.15985.15985.4	controllerType=0 controllerNumber=1 scan=15985	58.3367
R.C[+57.021]NTAAPMWLN[+2350.830]GTHPSSDEGIVSR.K	HexNAc(4)Hex(5)Fuc(1)NeuAc(2)	C[+57], N[+2351]	1617.66	3	4850.96	4850.96	0	-0.2	223	Specific	815.64	815.64	815.64	13.37	367	>sp|P07911|UROM_HUMAN Uromodulin OS=Homo sapiens OX=9606 GN=UMOD PE=1 SV=1	1	20230315_zy_umod_t-after.17320.17320.3	controllerType=0 controllerNumber=1 scan=17320	63.1706
R.C[+57.021]NTAAPMWLN[+2350.830]GTHPSSDEGIVSR.K	HexNAc(4)Hex(5)Fuc(1)NeuAc(2)	C[+57], N[+2351]	1213.5	4	4850.97	4850.96	0	0.7	223	Specific	843.7	843.7	843.7	13.43	367	>sp|P07911|UROM_HUMAN Uromodulin OS=Homo sapiens OX=9606 GN=UMOD PE=1 SV=1	1	20230315_zy_umod_t-after.17321.17321.4	controllerType=0 controllerNumber=1 scan=17321	63.174
R.C[+57.021]NTAAPMWLN[+2350.830]GTHPSSDEGIVSR.K	HexNAc(4)Hex(5)Fuc(1)NeuAc(2)	C[+57], N[+2351]	1617.66	3	4850.97	4850.96	0	1.2	223	Specific	844	844	844	12.88	367	>sp|P07911|UROM_HUMAN Uromodulin OS=Homo sapiens OX=9606 GN=UMOD PE=1 SV=1	1	20230315_zy_umod_t-after.17171.17171.3	controllerType=0 controllerNumber=1 scan=17171	62.6532
R.C[+57.021]NTAAPMWLN[+2350.830]GTHPSSDEGIVSR.K	HexNAc(4)Hex(5)Fuc(1)NeuAc(2)	C[+57], N[+2351]	1213.5	4	4850.97	4850.96	0	0.4	223	Specific	845.16	845.16	845.16	13.43	367	>sp|P07911|UROM_HUMAN Uromodulin OS=Homo sapiens OX=9606 GN=UMOD PE=1 SV=1	1	20230315_zy_umod_t-after.17172.17172.4	controllerType=0 controllerNumber=1 scan=17172	62.6558
R.C[+57.021]NTAAPMWLN[+2350.830]GTHPSSDEGIVSR.K	HexNAc(4)Hex(5)Fuc(1)NeuAc(2)	C[+57], N[+2351]	1213.5	4	4850.97	4850.96	0	0.9	223	Specific	861.46	861.46	861.46	14.43	367	>sp|P07911|UROM_HUMAN Uromodulin OS=Homo sapiens OX=9606 GN=UMOD PE=1 SV=1	1	20230315_zy_umod_t-after.17298.17298.4	controllerType=0 controllerNumber=1 scan=17298	63.0872
R.C[+57.021]NTAAPMWLN[+2350.830]GTHPSSDEGIVSR.K	HexNAc(4)Hex(5)Fuc(1)NeuAc(2)	C[+57], N[+2351]	1617.66	3	4850.97	4850.96	0	1.4	223	Specific	869.99	869.99	869.99	13.88	367	>sp|P07911|UROM_HUMAN Uromodulin OS=Homo sapiens OX=9606 GN=UMOD PE=1 SV=1	1	20230315_zy_umod_t-after.16993.16993.3	controllerType=0 controllerNumber=1 scan=16993	62.0355
R.C[+57.021]NTAAPMWLN[+2350.830]GTHPSSDEGIVSR.K	HexNAc(4)Hex(5)Fuc(1)NeuAc(2)	C[+57], N[+2351]	1213.5	4	4850.97	4850.96	0	0.3	223	Specific	886.36	886.36	886.36	14.43	367	>sp|P07911|UROM_HUMAN Uromodulin OS=Homo sapiens OX=9606 GN=UMOD PE=1 SV=1	1	20230315_zy_umod_t-after.17014.17014.4	controllerType=0 controllerNumber=1 scan=17014	62.1035
R.C[+57.021]NTAAPMWLN[+2350.830]GTHPSSDEGIVSR.K	HexNAc(4)Hex(5)Fuc(1)NeuAc(2)	C[+57], N[+2351]	1213.5	4	4850.97	4850.96	0	0.9	223	Specific	911.78	911.78	911.78	15.43	367	>sp|P07911|UROM_HUMAN Uromodulin OS=Homo sapiens OX=9606 GN=UMOD PE=1 SV=1	1	20230315_zy_umod_t-after.17252.17252.4	controllerType=0 controllerNumber=1 scan=17252	62.9309
R.C[+57.021]NTAAPMWLN[+2350.830]GTHPSSDEGIVSR.K	HexNAc(4)Hex(5)Fuc(1)NeuAc(2)	C[+57], N[+2351]	1213.5	4	4850.97	4850.96	0	0.9	223	Specific	914.75	914.75	914.75	15.43	367	>sp|P07911|UROM_HUMAN Uromodulin OS=Homo sapiens OX=9606 GN=UMOD PE=1 SV=1	1	20230315_zy_umod_t-after.16992.16992.4	controllerType=0 controllerNumber=1 scan=16992	62.0332
R.C[+57.021]NTAAPMWLN[+2350.830]GTHPSSDEGIVSR.K	HexNAc(4)Hex(5)Fuc(1)NeuAc(2)	C[+57], N[+2351]	1213.5	4	4850.97	4850.96	0	0.3	223	Specific	934.69	934.69	934.69	15.43	367	>sp|P07911|UROM_HUMAN Uromodulin OS=Homo sapiens OX=9606 GN=UMOD PE=1 SV=1	1	20230315_zy_umod_t-after.17163.17163.4	controllerType=0 controllerNumber=1 scan=17163	62.6184
R.C[+57.021]NTAAPMWLN[+2350.830]GTHPSSDEGIVSR.K	HexNAc(4)Hex(5)Fuc(1)NeuAc(2)	C[+57], N[+2351]	1213.5	4	4850.97	4850.96	0	1.3	223	Specific	964.81	964.81	964.81	15.93	367	>sp|P07911|UROM_HUMAN Uromodulin OS=Homo sapiens OX=9606 GN=UMOD PE=1 SV=1	1	20230315_zy_umod_t-after.17342.17342.4	controllerType=0 controllerNumber=1 scan=17342	63.24
R.C[+57.021]NTAAPM[+15.995]WLN[+1913.677]GTHPSSDEGIVSR.K	HexNAc(4)Hex(5)NeuAc(1)	C[+57], M[+16], N[+1914]	1477.28	3	4429.81	4429.81	0	1.4	223	Specific	203.26	194.88	99.78	4.11	367	>sp|P07911|UROM_HUMAN Uromodulin OS=Homo sapiens OX=9606 GN=UMOD PE=1 SV=1	1	20230315_zy_umod_t-after.13934.13934.3	controllerType=0 controllerNumber=1 scan=13934	50.877
R.C[+57.021]NTAAPM[+15.995]WLN[+1913.677]GTHPSSDEGIVSR.K	HexNAc(4)Hex(5)NeuAc(1)	C[+57], M[+16], N[+1914]	1476.93	3	4428.78	4429.81	-1	-4.3	223	Specific	218.19	218.19	218.19	4.69	367	>sp|P07911|UROM_HUMAN Uromodulin OS=Homo sapiens OX=9606 GN=UMOD PE=1 SV=1	1	20230315_zy_umod_t-after.13908.13908.3	controllerType=0 controllerNumber=1 scan=13908	50.7821
R.C[+57.021]NTAAPM[+15.995]WLN[+1913.677]GTHPSSDEGIVSR.K	HexNAc(4)Hex(5)NeuAc(1)	C[+57], M[+16], N[+1914]	1477.28	3	4429.81	4429.81	0	1.7	223	Specific	223.31	216.76	95.94	4.05	367	>sp|P07911|UROM_HUMAN Uromodulin OS=Homo sapiens OX=9606 GN=UMOD PE=1 SV=1	1	20230315_zy_umod_t-after.13704.13704.3	controllerType=0 controllerNumber=1 scan=13704	50.0415
R.C[+57.021]NTAAPMWLN[+1913.677]GTHPSSDEGIVSR.K	HexNAc(4)Hex(5)NeuAc(1)	C[+57], N[+1914]	1471.94	3	4413.8	4413.81	0	-2.7	223	Specific	245.47	245.47	103.29	4.87	367	>sp|P07911|UROM_HUMAN Uromodulin OS=Homo sapiens OX=9606 GN=UMOD PE=1 SV=1	1	20230315_zy_umod_t-after.17154.17154.3	controllerType=0 controllerNumber=1 scan=17154	62.5945
R.C[+57.021]NTAAPM[+15.995]WLN[+1913.677]GTHPSSDEGIVSR.K	HexNAc(4)Hex(5)NeuAc(1)	C[+57], M[+16], N[+1914]	1477.28	3	4429.81	4429.81	0	1.2	223	Specific	251.75	251.75	134.76	4.38	367	>sp|P07911|UROM_HUMAN Uromodulin OS=Homo sapiens OX=9606 GN=UMOD PE=1 SV=1	1	20230315_zy_umod_t-after.13552.13552.3	controllerType=0 controllerNumber=1 scan=13552	49.4793
R.C[+57.021]NTAAPM[+15.995]WLN[+1913.677]GTHPSSDEGIVSR.K	HexNAc(4)Hex(5)NeuAc(1)	C[+57], M[+16], N[+1914]	1477.27	3	4429.79	4429.81	0	-3.3	223	Specific	262.4	227.4	227.4	4.8	367	>sp|P07911|UROM_HUMAN Uromodulin OS=Homo sapiens OX=9606 GN=UMOD PE=1 SV=1	1	20230315_zy_umod_t-after.16464.16464.4	controllerType=0 controllerNumber=1 scan=16464	60.0946
R.C[+57.021]NTAAPM[+15.995]WLN[+1913.677]GTHPSSDEGIVSR.K	HexNAc(4)Hex(5)NeuAc(1)	C[+57], M[+16], N[+1914]	1477.28	3	4429.81	4429.81	0	1.2	223	Specific	277.59	265.71	108.86	4.46	367	>sp|P07911|UROM_HUMAN Uromodulin OS=Homo sapiens OX=9606 GN=UMOD PE=1 SV=1	1	20230315_zy_umod_t-after.13851.13851.3	controllerType=0 controllerNumber=1 scan=13851	50.5807
R.C[+57.021]NTAAPM[+15.995]WLN[+1913.677]GTHPSSDEGIVSR.K	HexNAc(4)Hex(5)NeuAc(1)	C[+57], M[+16], N[+1914]	1477.28	3	4429.81	4429.81	0	0.9	223	Specific	280.1	269.09	17.16	4.58	367	>sp|P07911|UROM_HUMAN Uromodulin OS=Homo sapiens OX=9606 GN=UMOD PE=1 SV=1	1	20230315_zy_umod_t-after.16037.16037.3	controllerType=0 controllerNumber=1 scan=16037	58.5278
R.C[+57.021]NTAAPM[+15.995]WLN[+1913.677]GTHPSSDEGIVSR.K	HexNAc(4)Hex(5)NeuAc(1)	C[+57], M[+16], N[+1914]	1477.27	3	4429.8	4429.81	0	-0.9	223	Specific	316.73	260.27	116.32	5.07	367	>sp|P07911|UROM_HUMAN Uromodulin OS=Homo sapiens OX=9606 GN=UMOD PE=1 SV=1	1	20230315_zy_umod_t-after.13749.13749.3	controllerType=0 controllerNumber=1 scan=13749	50.213
R.C[+57.021]NTAAPM[+15.995]WLN[+1913.677]GTHPSSDEGIVSR.K	HexNAc(4)Hex(5)NeuAc(1)	C[+57], M[+16], N[+1914]	1108.46	4	4430.8	4429.81	1	-2.2	223	Specific	340.42	340.42	340.42	5.41	367	>sp|P07911|UROM_HUMAN Uromodulin OS=Homo sapiens OX=9606 GN=UMOD PE=1 SV=1	1	20230315_zy_umod_t-after.16498.16498.4	controllerType=0 controllerNumber=1 scan=16498	60.2199
R.C[+57.021]NTAAPM[+15.995]WLN[+1913.677]GTHPSSDEGIVSR.K	HexNAc(4)Hex(5)NeuAc(1)	C[+57], M[+16], N[+1914]	1477.27	3	4429.8	4429.81	0	-2.2	223	Specific	357.32	339.89	339.89	5.35	367	>sp|P07911|UROM_HUMAN Uromodulin OS=Homo sapiens OX=9606 GN=UMOD PE=1 SV=1	1	20230315_zy_umod_t-after.16063.16063.3	controllerType=0 controllerNumber=1 scan=16063	58.6141
R.C[+57.021]NTAAPM[+15.995]WLN[+1913.677]GTHPSSDEGIVSR.K	HexNAc(4)Hex(5)NeuAc(1)	C[+57], M[+16], N[+1914]	1477.28	3	4429.81	4429.81	0	1.2	223	Specific	383.31	356.63	124.22	5.05	367	>sp|P07911|UROM_HUMAN Uromodulin OS=Homo sapiens OX=9606 GN=UMOD PE=1 SV=1	1	20230315_zy_umod_t-after.13577.13577.3	controllerType=0 controllerNumber=1 scan=13577	49.57
R.C[+57.021]NTAAPM[+15.995]WLN[+1913.677]GTHPSSDEGIVSR.K	HexNAc(4)Hex(5)NeuAc(1)	C[+57], M[+16], N[+1914]	1477.6	3	4430.79	4429.81	1	-5.5	223	Specific	386.2	386.2	386.2	6.88	367	>sp|P07911|UROM_HUMAN Uromodulin OS=Homo sapiens OX=9606 GN=UMOD PE=1 SV=1	1	20230315_zy_umod_t-after.16489.16489.3	controllerType=0 controllerNumber=1 scan=16489	60.1854
R.C[+57.021]NTAAPMWLN[+1913.677]GTHPSSDEGIVSR.K	HexNAc(4)Hex(5)NeuAc(1)	C[+57], N[+1914]	1471.6	3	4412.79	4413.81	-1	-3	223	Specific	390.92	390.92	124.08	6.88	367	>sp|P07911|UROM_HUMAN Uromodulin OS=Homo sapiens OX=9606 GN=UMOD PE=1 SV=1	1	20230315_zy_umod_t-after.17688.17688.3	controllerType=0 controllerNumber=1 scan=17688	64.4589
R.C[+57.021]NTAAPMWLN[+1913.677]GTHPSSDEGIVSR.K	HexNAc(4)Hex(5)NeuAc(1)	C[+57], N[+1914]	1471.61	3	4412.81	4413.81	-1	0.7	223	Specific	397.04	397.04	81.4	6.88	367	>sp|P07911|UROM_HUMAN Uromodulin OS=Homo sapiens OX=9606 GN=UMOD PE=1 SV=1	1	20230315_zy_umod_t-after.19181.19181.3	controllerType=0 controllerNumber=1 scan=19181	69.3264
R.C[+57.021]NTAAPMWLN[+1913.677]GTHPSSDEGIVSR.K	HexNAc(4)Hex(5)NeuAc(1)	C[+57], N[+1914]	1471.94	3	4413.8	4413.81	0	-1.8	223	Specific	426.88	426.88	171.36	6.95	367	>sp|P07911|UROM_HUMAN Uromodulin OS=Homo sapiens OX=9606 GN=UMOD PE=1 SV=1	1	20230315_zy_umod_t-after.17538.17538.3	controllerType=0 controllerNumber=1 scan=17538	63.9344
R.C[+57.021]NTAAPM[+15.995]WLN[+1913.677]GTHPSSDEGIVSR.K	HexNAc(4)Hex(5)NeuAc(1)	C[+57], M[+16], N[+1914]	1477.6	3	4430.79	4429.81	1	-4.8	223	Specific	470.52	470.52	470.52	7.1	367	>sp|P07911|UROM_HUMAN Uromodulin OS=Homo sapiens OX=9606 GN=UMOD PE=1 SV=1	1	20230315_zy_umod_t-after.16510.16510.3	controllerType=0 controllerNumber=1 scan=16510	60.267
R.C[+57.021]NTAAPM[+15.995]WLN[+1913.677]GTHPSSDEGIVSR.K	HexNAc(4)Hex(5)NeuAc(1)	C[+57], M[+16], N[+1914]	1476.93	3	4428.79	4429.81	-1	-2.9	223	Specific	501.81	501.81	501.81	7.19	367	>sp|P07911|UROM_HUMAN Uromodulin OS=Homo sapiens OX=9606 GN=UMOD PE=1 SV=1	1	20230315_zy_umod_t-after.16259.16259.3	controllerType=0 controllerNumber=1 scan=16259	59.3326
R.C[+57.021]NTAAPM[+15.995]WLN[+1913.677]GTHPSSDEGIVSR.K	HexNAc(4)Hex(5)NeuAc(1)	C[+57], M[+16], N[+1914]	1477.28	3	4429.82	4429.81	0	2.1	223	Specific	504.6	483.61	160.42	6.31	367	>sp|P07911|UROM_HUMAN Uromodulin OS=Homo sapiens OX=9606 GN=UMOD PE=1 SV=1	1	20230315_zy_umod_t-after.14417.14417.3	controllerType=0 controllerNumber=1 scan=14417	52.6717
R.C[+57.021]NTAAPMWLN[+1913.677]GTHPSSDEGIVSR.K	HexNAc(4)Hex(5)NeuAc(1)	C[+57], N[+1914]	1472.27	3	4414.79	4413.81	1	-5.5	223	Specific	506.89	506.89	13.02	7.19	367	>sp|P07911|UROM_HUMAN Uromodulin OS=Homo sapiens OX=9606 GN=UMOD PE=1 SV=1	1	20230315_zy_umod_t-after.16670.16670.4	controllerType=0 controllerNumber=1 scan=16670	60.848
R.C[+57.021]NTAAPM[+15.995]WLN[+1913.677]GTHPSSDEGIVSR.K	HexNAc(4)Hex(5)NeuAc(1)	C[+57], M[+16], N[+1914]	1477.28	3	4429.81	4429.81	0	1.2	223	Specific	521.57	503.47	213.96	6.87	367	>sp|P07911|UROM_HUMAN Uromodulin OS=Homo sapiens OX=9606 GN=UMOD PE=1 SV=1	1	20230315_zy_umod_t-after.13903.13903.3	controllerType=0 controllerNumber=1 scan=13903	50.763
R.C[+57.021]NTAAPM[+15.995]WLN[+1913.677]GTHPSSDEGIVSR.K	HexNAc(4)Hex(5)NeuAc(1)	C[+57], M[+16], N[+1914]	1477.6	3	4430.79	4429.81	1	-4.8	223	Specific	525.29	525.29	525.29	7.36	367	>sp|P07911|UROM_HUMAN Uromodulin OS=Homo sapiens OX=9606 GN=UMOD PE=1 SV=1	1	20230315_zy_umod_t-after.16116.16116.3	controllerType=0 controllerNumber=1 scan=16116	58.8084
R.C[+57.021]NTAAPMWLN[+1913.677]GTHPSSDEGIVSR.K	HexNAc(4)Hex(5)NeuAc(1)	C[+57], N[+1914]	1471.6	3	4412.79	4413.81	-1	-3.3	223	Specific	526.38	526.38	118.85	7.36	367	>sp|P07911|UROM_HUMAN Uromodulin OS=Homo sapiens OX=9606 GN=UMOD PE=1 SV=1	1	20230315_zy_umod_t-after.17667.17667.3	controllerType=0 controllerNumber=1 scan=17667	64.3831
R.C[+57.021]NTAAPM[+15.995]WLN[+1913.677]GTHPSSDEGIVSR.K	HexNAc(4)Hex(5)NeuAc(1)	C[+57], M[+16], N[+1914]	1477.6	3	4430.79	4429.81	1	-5.4	223	Specific	533.69	533.69	533.69	7.36	367	>sp|P07911|UROM_HUMAN Uromodulin OS=Homo sapiens OX=9606 GN=UMOD PE=1 SV=1	1	20230315_zy_umod_t-after.15957.15957.2	controllerType=0 controllerNumber=1 scan=15957	58.2369
R.C[+57.021]NTAAPMWLN[+1913.677]GTHPSSDEGIVSR.K	HexNAc(4)Hex(5)NeuAc(1)	C[+57], N[+1914]	1471.94	3	4413.82	4413.81	0	1.1	223	Specific	539.43	539.43	78.21	6.87	367	>sp|P07911|UROM_HUMAN Uromodulin OS=Homo sapiens OX=9606 GN=UMOD PE=1 SV=1	1	20230315_zy_umod_t-after.15790.15790.4	controllerType=0 controllerNumber=1 scan=15790	57.6608
R.C[+57.021]NTAAPM[+15.995]WLN[+1913.677]GTHPSSDEGIVSR.K	HexNAc(4)Hex(5)NeuAc(1)	C[+57], M[+16], N[+1914]	1108.21	4	4429.81	4429.81	0	1.1	223	Specific	548.62	548.62	190.99	6.92	367	>sp|P07911|UROM_HUMAN Uromodulin OS=Homo sapiens OX=9606 GN=UMOD PE=1 SV=1	1	20230315_zy_umod_t-after.13678.13678.4	controllerType=0 controllerNumber=1 scan=13678	49.9458
R.C[+57.021]NTAAPM[+15.995]WLN[+1913.677]GTHPSSDEGIVSR.K	HexNAc(4)Hex(5)NeuAc(1)	C[+57], M[+16], N[+1914]	1476.94	3	4428.8	4429.81	-1	-1.4	223	Specific	551.79	551.79	551.79	7.36	367	>sp|P07911|UROM_HUMAN Uromodulin OS=Homo sapiens OX=9606 GN=UMOD PE=1 SV=1	1	20230315_zy_umod_t-after.13772.13772.3	controllerType=0 controllerNumber=1 scan=13772	50.2929
R.C[+57.021]NTAAPM[+15.995]WLN[+1913.677]GTHPSSDEGIVSR.K	HexNAc(4)Hex(5)NeuAc(1)	C[+57], M[+16], N[+1914]	1108.21	4	4429.81	4429.81	0	1.1	223	Specific	553.9	553.9	317.29	6.92	367	>sp|P07911|UROM_HUMAN Uromodulin OS=Homo sapiens OX=9606 GN=UMOD PE=1 SV=1	1	20230315_zy_umod_t-after.14393.14393.4	controllerType=0 controllerNumber=1 scan=14393	52.5762
R.C[+57.021]NTAAPMWLN[+1913.677]GTHPSSDEGIVSR.K	HexNAc(4)Hex(5)NeuAc(1)	C[+57], N[+1914]	1472.27	3	4414.8	4413.81	1	-2.3	223	Specific	566.26	566.26	124.44	8.37	367	>sp|P07911|UROM_HUMAN Uromodulin OS=Homo sapiens OX=9606 GN=UMOD PE=1 SV=1	1	20230315_zy_umod_t-after.16288.16288.3	controllerType=0 controllerNumber=1 scan=16288	59.4381
R.C[+57.021]NTAAPMWLN[+1913.677]GTHPSSDEGIVSR.K	HexNAc(4)Hex(5)NeuAc(1)	C[+57], N[+1914]	1471.94	3	4413.81	4413.81	0	-0.1	223	Specific	581.12	581.12	188.31	8.37	367	>sp|P07911|UROM_HUMAN Uromodulin OS=Homo sapiens OX=9606 GN=UMOD PE=1 SV=1	1	20230315_zy_umod_t-after.15590.15590.3	controllerType=0 controllerNumber=1 scan=15590	56.9433
R.C[+57.021]NTAAPMWLN[+1913.677]GTHPSSDEGIVSR.K	HexNAc(4)Hex(5)NeuAc(1)	C[+57], N[+1914]	1471.61	3	4412.81	4413.81	-1	0.8	223	Specific	591.74	591.74	136.9	8.37	367	>sp|P07911|UROM_HUMAN Uromodulin OS=Homo sapiens OX=9606 GN=UMOD PE=1 SV=1	1	20230315_zy_umod_t-after.15946.15946.3	controllerType=0 controllerNumber=1 scan=15946	58.2054
R.C[+57.021]NTAAPMWLN[+1913.677]GTHPSSDEGIVSR.K	HexNAc(4)Hex(5)NeuAc(1)	C[+57], N[+1914]	1472.28	3	4414.81	4413.81	1	-0.1	223	Specific	632.73	632.73	148.19	9.37	367	>sp|P07911|UROM_HUMAN Uromodulin OS=Homo sapiens OX=9606 GN=UMOD PE=1 SV=1	1	20230315_zy_umod_t-after.18012.18012.4	controllerType=0 controllerNumber=1 scan=18012	65.6222
R.C[+57.021]NTAAPMWLN[+1913.677]GTHPSSDEGIVSR.K	HexNAc(4)Hex(5)NeuAc(1)	C[+57], N[+1914]	1471.94	3	4413.82	4413.81	0	2.1	223	Specific	636.43	636.43	232.96	8.73	367	>sp|P07911|UROM_HUMAN Uromodulin OS=Homo sapiens OX=9606 GN=UMOD PE=1 SV=1	1	20230315_zy_umod_t-after.15724.15724.3	controllerType=0 controllerNumber=1 scan=15724	57.4218
R.C[+57.021]NTAAPM[+15.995]WLN[+1913.677]GTHPSSDEGIVSR.K	HexNAc(4)Hex(5)NeuAc(1)	C[+57], M[+16], N[+1914]	1476.94	3	4428.8	4429.81	-1	0.2	223	Specific	639.46	639.46	639.46	9.37	367	>sp|P07911|UROM_HUMAN Uromodulin OS=Homo sapiens OX=9606 GN=UMOD PE=1 SV=1	1	20230315_zy_umod_t-after.13927.13927.3	controllerType=0 controllerNumber=1 scan=13927	50.8551
R.C[+57.021]NTAAPM[+15.995]WLN[+1913.677]GTHPSSDEGIVSR.K	HexNAc(4)Hex(5)NeuAc(1)	C[+57], M[+16], N[+1914]	1476.94	3	4428.8	4429.81	-1	-1.7	223	Specific	675.23	675.23	675.23	10.37	367	>sp|P07911|UROM_HUMAN Uromodulin OS=Homo sapiens OX=9606 GN=UMOD PE=1 SV=1	1	20230315_zy_umod_t-after.13642.13642.3	controllerType=0 controllerNumber=1 scan=13642	49.8149
R.C[+57.021]NTAAPMWLN[+1913.677]GTHPSSDEGIVSR.K	HexNAc(4)Hex(5)NeuAc(1)	C[+57], N[+1914]	1103.95	4	4412.8	4413.81	-1	-2.3	223	Specific	691.11	691.11	193.5	10.43	367	>sp|P07911|UROM_HUMAN Uromodulin OS=Homo sapiens OX=9606 GN=UMOD PE=1 SV=1	1	20230315_zy_umod_t-after.17566.17566.4	controllerType=0 controllerNumber=1 scan=17566	64.0304
R.C[+57.021]NTAAPMWLN[+1913.677]GTHPSSDEGIVSR.K	HexNAc(4)Hex(5)NeuAc(1)	C[+57], N[+1914]	1104.21	4	4413.82	4413.81	0	2.3	223	Specific	694.18	694.18	235.29	9.55	367	>sp|P07911|UROM_HUMAN Uromodulin OS=Homo sapiens OX=9606 GN=UMOD PE=1 SV=1	1	20230315_zy_umod_t-after.15696.15696.4	controllerType=0 controllerNumber=1 scan=15696	57.3238
R.C[+57.021]NTAAPM[+15.995]WLN[+1913.677]GTHPSSDEGIVSR.K	HexNAc(4)Hex(5)NeuAc(1)	C[+57], M[+16], N[+1914]	1477.28	3	4429.81	4429.81	0	1.7	223	Specific	706.66	706.66	185.97	10.73	367	>sp|P07911|UROM_HUMAN Uromodulin OS=Homo sapiens OX=9606 GN=UMOD PE=1 SV=1	1	20230315_zy_umod_t-after.13558.13558.3	controllerType=0 controllerNumber=1 scan=13558	49.5046
R.C[+57.021]NTAAPM[+15.995]WLN[+1913.677]GTHPSSDEGIVSR.K	HexNAc(4)Hex(5)NeuAc(1)	C[+57], M[+16], N[+1914]	1108.21	4	4429.81	4429.81	0	0.6	223	Specific	730.13	717.59	309.57	11.43	367	>sp|P07911|UROM_HUMAN Uromodulin OS=Homo sapiens OX=9606 GN=UMOD PE=1 SV=1	1	20230315_zy_umod_t-after.13645.13645.4	controllerType=0 controllerNumber=1 scan=13645	49.8242
R.C[+57.021]NTAAPM[+15.995]WLN[+1913.677]GTHPSSDEGIVSR.K	HexNAc(4)Hex(5)NeuAc(1)	C[+57], M[+16], N[+1914]	1108.21	4	4429.82	4429.81	0	2.1	223	Specific	731.76	673.03	383.21	10.55	367	>sp|P07911|UROM_HUMAN Uromodulin OS=Homo sapiens OX=9606 GN=UMOD PE=1 SV=1	1	20230315_zy_umod_t-after.13560.13560.4	controllerType=0 controllerNumber=1 scan=13560	49.5105
R.C[+57.021]NTAAPMWLN[+1913.677]GTHPSSDEGIVSR.K	HexNAc(4)Hex(5)NeuAc(1)	C[+57], N[+1914]	1471.94	3	4413.8	4413.81	0	-1.7	223	Specific	751.39	751.39	161.99	12.37	367	>sp|P07911|UROM_HUMAN Uromodulin OS=Homo sapiens OX=9606 GN=UMOD PE=1 SV=1	1	20230315_zy_umod_t-after.16043.16043.3	controllerType=0 controllerNumber=1 scan=16043	58.542
R.C[+57.021]NTAAPMWLN[+1913.677]GTHPSSDEGIVSR.K	HexNAc(4)Hex(5)NeuAc(1)	C[+57], N[+1914]	1471.6	3	4412.78	4413.81	-1	-5.3	223	Specific	753.34	753.34	176.45	12.37	367	>sp|P07911|UROM_HUMAN Uromodulin OS=Homo sapiens OX=9606 GN=UMOD PE=1 SV=1	1	20230315_zy_umod_t-after.17574.17574.3	controllerType=0 controllerNumber=1 scan=17574	64.0629
R.C[+57.021]NTAAPMWLN[+1913.677]GTHPSSDEGIVSR.K	HexNAc(4)Hex(5)NeuAc(1)	C[+57], N[+1914]	1471.6	3	4412.8	4413.81	-1	-2.5	223	Specific	758.24	758.24	226.18	12.37	367	>sp|P07911|UROM_HUMAN Uromodulin OS=Homo sapiens OX=9606 GN=UMOD PE=1 SV=1	1	20230315_zy_umod_t-after.17708.17708.3	controllerType=0 controllerNumber=1 scan=17708	64.5294
R.C[+57.021]NTAAPMWLN[+1913.677]GTHPSSDEGIVSR.K	HexNAc(4)Hex(5)NeuAc(1)	C[+57], N[+1914]	1471.94	3	4413.82	4413.81	0	1.5	223	Specific	765.33	765.33	274.47	11.88	367	>sp|P07911|UROM_HUMAN Uromodulin OS=Homo sapiens OX=9606 GN=UMOD PE=1 SV=1	1	20230315_zy_umod_t-after.15730.15730.3	controllerType=0 controllerNumber=1 scan=15730	57.4483
R.C[+57.021]NTAAPMWLN[+1913.677]GTHPSSDEGIVSR.K	HexNAc(4)Hex(5)NeuAc(1)	C[+57], N[+1914]	1104.21	4	4413.8	4413.81	0	-2.8	223	Specific	811.04	811.04	468.09	13.43	367	>sp|P07911|UROM_HUMAN Uromodulin OS=Homo sapiens OX=9606 GN=UMOD PE=1 SV=1	1	20230315_zy_umod_t-after.15851.15851.4	controllerType=0 controllerNumber=1 scan=15851	57.8725
R.C[+57.021]NTAAPMWLN[+1913.677]GTHPSSDEGIVSR.K	HexNAc(4)Hex(5)NeuAc(1)	C[+57], N[+1914]	1471.94	3	4413.81	4413.81	0	0.1	223	Specific	829.37	829.37	335.24	13.37	367	>sp|P07911|UROM_HUMAN Uromodulin OS=Homo sapiens OX=9606 GN=UMOD PE=1 SV=1	1	20230315_zy_umod_t-after.15598.15598.3	controllerType=0 controllerNumber=1 scan=15598	56.9786
R.C[+57.021]NTAAPMWLN[+1913.677]GTHPSSDEGIVSR.K	HexNAc(4)Hex(5)NeuAc(1)	C[+57], N[+1914]	1104.21	4	4413.81	4413.81	0	0.5	223	Specific	888.64	888.64	247.75	14.43	367	>sp|P07911|UROM_HUMAN Uromodulin OS=Homo sapiens OX=9606 GN=UMOD PE=1 SV=1	1	20230315_zy_umod_t-after.15974.15974.4	controllerType=0 controllerNumber=1 scan=15974	58.293
R.C[+57.021]NTAAPMWLN[+1913.677]GTHPSSDEGIVSR.K	HexNAc(4)Hex(5)NeuAc(1)	C[+57], N[+1914]	1104.21	4	4413.81	4413.81	0	-0.2	223	Specific	899.07	899.07	475.11	14.43	367	>sp|P07911|UROM_HUMAN Uromodulin OS=Homo sapiens OX=9606 GN=UMOD PE=1 SV=1	1	20230315_zy_umod_t-after.15982.15982.4	controllerType=0 controllerNumber=1 scan=15982	58.3285
R.C[+57.021]NTAAPMWLN[+1913.677]GTHPSSDEGIVSR.K	HexNAc(4)Hex(5)NeuAc(1)	C[+57], N[+1914]	1104.21	4	4413.81	4413.81	0	0.2	223	Specific	907.61	907.61	495.53	15.43	367	>sp|P07911|UROM_HUMAN Uromodulin OS=Homo sapiens OX=9606 GN=UMOD PE=1 SV=1	1	20230315_zy_umod_t-after.15732.15732.4	controllerType=0 controllerNumber=1 scan=15732	57.4525
R.C[+57.021]NTAAPMWLN[+1913.677]GTHPSSDEGIVSR.K	HexNAc(4)Hex(5)NeuAc(1)	C[+57], N[+1914]	1104.21	4	4413.81	4413.81	0	0.2	223	Specific	948.06	948.06	480.78	15.43	367	>sp|P07911|UROM_HUMAN Uromodulin OS=Homo sapiens OX=9606 GN=UMOD PE=1 SV=1	1	20230315_zy_umod_t-after.15599.15599.4	controllerType=0 controllerNumber=1 scan=15599	56.9809
R.C[+57.021]NTAAPM[+15.995]WLN[+2204.772]GTHPSSDEGIVSR.K	HexNAc(4)Hex(5)NeuAc(2)	C[+57], M[+16], N[+2205]	1573.97	3	4719.9	4720.9	-1	-0.4	223	Specific	235.07	235.07	235.07	4.76	367	>sp|P07911|UROM_HUMAN Uromodulin OS=Homo sapiens OX=9606 GN=UMOD PE=1 SV=1	1	20230315_zy_umod_t-after.15050.15050.3	controllerType=0 controllerNumber=1 scan=15050	55.035
R.C[+57.021]NTAAPMWLN[+2204.772]GTHPSSDEGIVSR.K	HexNAc(4)Hex(5)NeuAc(2)	C[+57], N[+2205]	1568.64	3	4703.9	4704.91	-1	-1	223	Specific	251.12	251.12	251.12	4.87	367	>sp|P07911|UROM_HUMAN Uromodulin OS=Homo sapiens OX=9606 GN=UMOD PE=1 SV=1	1	20230315_zy_umod_t-after.19248.19248.4	controllerType=0 controllerNumber=1 scan=19248	69.5584
R.C[+57.021]NTAAPM[+15.995]WLN[+2204.772]GTHPSSDEGIVSR.K	HexNAc(4)Hex(5)NeuAc(2)	C[+57], M[+16], N[+2205]	1574.31	3	4720.9	4720.9	0	0	223	Specific	261.79	261.79	104.39	4.95	367	>sp|P07911|UROM_HUMAN Uromodulin OS=Homo sapiens OX=9606 GN=UMOD PE=1 SV=1	1	20230315_zy_umod_t-after.15487.15487.3	controllerType=0 controllerNumber=1 scan=15487	56.5842
R.C[+57.021]NTAAPMWLN[+2204.772]GTHPSSDEGIVSR.K	HexNAc(4)Hex(5)NeuAc(2)	C[+57], N[+2205]	1568.96	3	4704.88	4704.91	0	-5.8	223	Specific	266.69	266.69	140.09	4.95	367	>sp|P07911|UROM_HUMAN Uromodulin OS=Homo sapiens OX=9606 GN=UMOD PE=1 SV=1	1	20230315_zy_umod_t-after.19079.19079.3	controllerType=0 controllerNumber=1 scan=19079	69.0392
[truncated: 3,280 more rows]

## Sheet: Table S3.4
Supplementary Table S3.4. Site-specific N-glycosylation anlaysis of Umod (N275)
[truncated: 207 more rows]

[truncated: 3 more sheets: Table S3.5, Table S3.6, Table S3.7]
