# Supplementary material for: Characterization of site-specific N-glycosylation signatures of isolated uromodulin from human urine
Source: Royal Society of Chemistry journal article supplement (doi:10.1039/d3an01018j), 2023-01-01
Supplement: d3an01018j4.xlsx [file d3an01018j4.xlsx]

## Sheet: Table S4
Supplementary Table S4. Basic information about the source of these urine samples.
Group	Accession Number	Age	Sex	Concentration (ug/mL)
HC	HC01	34	Male
	HC02	24	Male
	HC03	35	Male
	HC04	36	Male
	HC05	24	Female
	HC06	30	Female
	HC07	24	Female
	HC08	27	Female
	HC09	34	Male
IgAN	IgAN01	53	Male
	IgAN02	32	Male
	IgAN03	25	Male
	IgAN04	31	Male
	IgAN05	33	Female
	IgAN06	35	Female
	IgAN07	30	Female
	IgAN08	30	Female
	IgAN09	40	Female
