# Supplementary material for: Characterization of site-specific N-glycosylation signatures of isolated uromodulin from human urine
Source: Royal Society of Chemistry journal article supplement (doi:10.1039/d3an01018j), 2023-01-01
Supplement: d3an01018j5.xlsx [file d3an01018j5.xlsx]

## Sheet: Table S5.1
Supplementary Table S5.1. Quantified intact N-glycopeptides of Umod from the HC and IgAN groups.
Intact N-glycopetides	N-glycans	Position	Proteins	Mass	HC01	HC02	HC03	HC04	HC05	HC06	HC07	HC08	HC09	IgAN01	IgAN02	IgAN03	IgAN04	IgAN05	IgAN06	IgAN07	IgAN08	IgAN09
R.WC[+57.02146]SEC[+57.02146]HSN[+3081.09474]ATC[+57.02146]TE.D	HexNAc(6)Hex(7)Fuc(1)NeuAc(2)	31	>sp|P07911|UROM_HUMAN Uromodulin OS=Homo sapiens OX=9606 GN=UMOD PE=1 SV=1	4721.66	0	3.04003e+06	0	0	0	0	0	0	0	0	0	0	0	0	0	0	0	0
R.WC[+57.02146]SEC[+57.02146]HSN[+3663.28558]ATC[+57.02146]TE.D	HexNAc(6)Hex(7)Fuc(1)NeuAc(4)	31	>sp|P07911|UROM_HUMAN Uromodulin OS=Homo sapiens OX=9606 GN=UMOD PE=1 SV=1	5303.85	0	6.89398e+07	0	0	0	0	0	0	0	0	0	0	0	0	0	0	0	0
R.WC[+57.02146]SEC[+57.02146]HSN[+3866.36495]ATC[+57.02146]TE.D	HexNAc(7)Hex(7)Fuc(1)NeuAc(4)	31	>sp|P07911|UROM_HUMAN Uromodulin OS=Homo sapiens OX=9606 GN=UMOD PE=1 SV=1	5506.93	0	6.31828e+06	0	0	0	0	0	0	0	0	0	0	0	0	0	0	0	0
R.WC[+57.02146]SEC[+57.02146]HSN[+4307.54957]ATC[+57.02146]TE.D	HexNAc(11)Hex(11)NeuAc(1)	31	>sp|P07911|UROM_HUMAN Uromodulin OS=Homo sapiens OX=9606 GN=UMOD PE=1 SV=1	5948.11	0	5.0201e+07	0	0	0	0	0	0	0	0	0	0	0	0	0	0	0	0
R.WC[+57.02146]SEC[+57.02146]HSN[+3405.20039]ATC[+57.02146]TEDE.A	HexNAc(6)Hex(9)Fuc(1)NeuAc(2)	31	>sp|P07911|UROM_HUMAN Uromodulin OS=Homo sapiens OX=9606 GN=UMOD PE=1 SV=1	5289.84	1.18777e+07	0	0	0	0	0	0	0	0	0	0	0	0	0	0	0	0	0
R.WC[+57.02146]SEC[+57.02146]HSN[+3517.22767]ATC[+57.02146]TEDE.A	HexNAc(6)Hex(7)NeuAc(4)	31	>sp|P07911|UROM_HUMAN Uromodulin OS=Homo sapiens OX=9606 GN=UMOD PE=1 SV=1	5401.86	0	8.46301e+06	0	0	0	0	0	0	0	0	0	0	0	0	0	0	0	0
E.C[+57.02146]HSN[+2627.94650]ATC[+57.02146]TE.D	HexNAc(6)Hex(6)Fuc(1)NeuAc(1)	35	>sp|P07911|UROM_HUMAN Uromodulin OS=Homo sapiens OX=9606 GN=UMOD PE=1 SV=1	3706.33	0	1.4826e+07	0	0	0	0	0	0	0	0	0	0	0	0	0	0	0	0
E.C[+57.02146]HSN[+2715.96255]ATC[+57.02146]TE.D	HexNAc(5)Hex(6)Fuc(1)NeuAc(2)	35	>sp|P07911|UROM_HUMAN Uromodulin OS=Homo sapiens OX=9606 GN=UMOD PE=1 SV=1	3794.34	0	0	0	8.37374e+07	0	0	0	0	0	0	0	0	0	0	0	0	0	0
E.C[+57.02146]HSN[+3210.13734]ATC[+57.02146]TE.D	HexNAc(6)Hex(6)Fuc(1)NeuAc(3)	35	>sp|P07911|UROM_HUMAN Uromodulin OS=Homo sapiens OX=9606 GN=UMOD PE=1 SV=1	4288.52	0	0	0	6.76145e+07	0	0	0	0	0	0	0	0	0	0	0	0	0	0
E.C[+57.02146]HSN[+3517.22767]ATC[+57.02146]TE.D	HexNAc(6)Hex(7)NeuAc(4)	35	>sp|P07911|UROM_HUMAN Uromodulin OS=Homo sapiens OX=9606 GN=UMOD PE=1 SV=1	4595.61	1.4352e+07	0	0	0	0	0	0	0	0	0	0	0	0	0	0	0	0	0
E.C[+57.02146]HSN[+2424.86713]ATC[+57.02146]TEDE.A	HexNAc(5)Hex(6)Fuc(1)NeuAc(1)	35	>sp|P07911|UROM_HUMAN Uromodulin OS=Homo sapiens OX=9606 GN=UMOD PE=1 SV=1	3747.32	0	0	0	0	0	0	0	0	1.07047e+06	0	0	0	0	0	0	0	0	0
E.C[+57.02146]HSN[+2789.99933]ATC[+57.02146]TEDE.A	HexNAc(6)Hex(7)Fuc(1)NeuAc(1)	35	>sp|P07911|UROM_HUMAN Uromodulin OS=Homo sapiens OX=9606 GN=UMOD PE=1 SV=1	4112.45	0	0	0	7.33395e+07	0	0	0	0	0	0	0	0	0	0	0	0	0	0
E.C[+57.02146]HSN[+2935.03683]ATC[+57.02146]TEDE.A	HexNAc(6)Hex(7)NeuAc(2)	35	>sp|P07911|UROM_HUMAN Uromodulin OS=Homo sapiens OX=9606 GN=UMOD PE=1 SV=1	4257.49	0	0	0	1.17551e+08	0	0	0	0	0	0	0	0	0	0	0	0	0	0
E.C[+57.02146]HSN[+3210.13734]ATC[+57.02146]TEDE.A	HexNAc(6)Hex(6)Fuc(1)NeuAc(3)	35	>sp|P07911|UROM_HUMAN Uromodulin OS=Homo sapiens OX=9606 GN=UMOD PE=1 SV=1	4532.59	0	0	0	9.58026e+07	0	0	0	0	0	0	0	0	0	0	0	0	0	0
E.C[+57.02146]HSN[+3575.26953]ATC[+57.02146]TEDE.A	HexNAc(7)Hex(7)Fuc(1)NeuAc(3)	35	>sp|P07911|UROM_HUMAN Uromodulin OS=Homo sapiens OX=9606 GN=UMOD PE=1 SV=1	4897.72	0	4.00416e+07	0	0	0	0	0	0	0	0	0	0	0	0	0	0	0	0
E.C[+57.02146]HSN[+3704.31212]ATC[+57.02146]TEDE.A	HexNAc(7)Hex(6)Fuc(1)NeuAc(4)	35	>sp|P07911|UROM_HUMAN Uromodulin OS=Homo sapiens OX=9606 GN=UMOD PE=1 SV=1	5026.76	0	2.24895e+07	0	0	0	0	0	0	0	0	0	0	0	0	0	0	0	0
E.C[+57.02146]HSN[+3737.32236]ATC[+57.02146]TEDE.A	HexNAc(7)Hex(8)Fuc(1)NeuAc(3)	35	>sp|P07911|UROM_HUMAN Uromodulin OS=Homo sapiens OX=9606 GN=UMOD PE=1 SV=1	5059.77	0	0	0	2.00384e+06	0	0	0	0	0	0	0	0	0	0	0	0	0	0
E.C[+57.02146]HSN[+4307.54957]ATC[+57.02146]TEDE.A	HexNAc(11)Hex(11)NeuAc(1)	35	>sp|P07911|UROM_HUMAN Uromodulin OS=Homo sapiens OX=9606 GN=UMOD PE=1 SV=1	5630	4.22483e+07	0	0	0	0	0	0	0	0	0	0	0	0	0	0	0	0	0
E.C[+57.02146]HSN[+2756.98910]ATC[+57.02146]TEDEAVTTC[+57.02146]TC[+57.02146]QE.G	HexNAc(6)Hex(5)Fuc(1)NeuAc(2)	35	>sp|P07911|UROM_HUMAN Uromodulin OS=Homo sapiens OX=9606 GN=UMOD PE=1 SV=1	5129.85	0	7.29634e+06	0	0	0	0	0	0	0	0	0	0	0	0	0	0	0	0
E.C[+57.02146]HSN[+3009.07361]ATC[+57.02146]TEDEAVTTC[+57.02146]TC[+57.02146]QE.G	HexNAc(7)Hex(8)NeuAc(1)	35	>sp|P07911|UROM_HUMAN Uromodulin OS=Homo sapiens OX=9606 GN=UMOD PE=1 SV=1	5381.93	0	0	0	0	0	0	0	0	3.13572e+07	0	0	0	0	0	0	0	0	0
E.C[+57.02146]HSN[+2935.03683]ATC[+57.02146]TE.D	HexNAc(6)Hex(7)NeuAc(2)	35	>sp|P07911|UROM_HUMAN Uromodulin OS=Homo sapiens OX=9606 GN=UMOD PE=1 SV=1	4013.42	0	0	0	3.40555e+07	0	0	0	0	0	0	0	0	0	0	0	0	0	0
E.C[+57.02146]HSN[+4102.45455]ATC[+57.02146]TEDEAVTTC[+57.02146]TC[+57.02146]QE.G	HexNAc(8)Hex(9)Fuc(1)NeuAc(3)	35	>sp|P07911|UROM_HUMAN Uromodulin OS=Homo sapiens OX=9606 GN=UMOD PE=1 SV=1	6475.32	0	0	0	464026	0	0	0	0	0	0	0	0	0	0	0	0	0	0
R.C[+57.02146]NTAAPMWLN[+1460.52878]GTHPSSDE.G	HexNAc(4)Hex(4)	223	>sp|P07911|UROM_HUMAN Uromodulin OS=Homo sapiens OX=9606 GN=UMOD PE=1 SV=1	3447.35	0	1.48275e+07	0	0	0	0	0	0	0	0	0	0	0	0	0	0	0	0
R.C[+57.02146]NTAAPMWLN[+1825.66098]GTHPSSDE.G	HexNAc(5)Hex(5)	223	>sp|P07911|UROM_HUMAN Uromodulin OS=Homo sapiens OX=9606 GN=UMOD PE=1 SV=1	3812.48	4.16988e+07	0	0	0	0	0	0	0	0	0	0	0	0	0	0	0	0	0
R.C[+57.02146]NTAAPMWLN[+1907.71408]GTHPSSDE.G	HexNAc(7)Hex(3)	223	>sp|P07911|UROM_HUMAN Uromodulin OS=Homo sapiens OX=9606 GN=UMOD PE=1 SV=1	3894.53	7.57396e+07	0	0	0	0	0	0	0	0	0	0	0	0	0	0	0	0	0
R.C[+57.02146]NTAAPMWLN[+1987.71380]GTHPSSDE.G	HexNAc(5)Hex(6)	223	>sp|P07911|UROM_HUMAN Uromodulin OS=Homo sapiens OX=9606 GN=UMOD PE=1 SV=1	3974.53	0	0	0	5.48903e+07	0	0	0	0	0	0	0	0	0	0	0	0	0	0
R.C[+57.02146]NTAAPMWLN[+2053.77199]GTHPSSDE.G	HexNAc(7)Hex(3)Fuc(1)	223	>sp|P07911|UROM_HUMAN Uromodulin OS=Homo sapiens OX=9606 GN=UMOD PE=1 SV=1	4040.59	4.40581e+08	0	0	0	0	0	0	0	0	0	0	0	0	0	0	0	0	0
R.C[+57.02146]NTAAPMWLN[+2272.84627]GTHPSSDE.G	HexNAc(8)Hex(4)	223	>sp|P07911|UROM_HUMAN Uromodulin OS=Homo sapiens OX=9606 GN=UMOD PE=1 SV=1	4259.67	0	1.57873e+07	0	0	0	0	0	0	0	0	0	0	0	0	0	0	0	0
R.C[+57.02146]NTAAPMWLN[+2555.92537]GTHPSSDE.G	HexNAc(7)Hex(7)	223	>sp|P07911|UROM_HUMAN Uromodulin OS=Homo sapiens OX=9606 GN=UMOD PE=1 SV=1	4542.75	0	0	0	0	0	0	0	0	1.0372e+08	0	0	0	0	0	0	0	0	0
R.C[+57.02146]NTAAPMWLN[+2717.97820]GTHPSSDE.G	HexNAc(7)Hex(8)	223	>sp|P07911|UROM_HUMAN Uromodulin OS=Homo sapiens OX=9606 GN=UMOD PE=1 SV=1	4704.8	0	0	0	2.33594e+07	0	0	0	0	0	0	0	0	0	0	0	0	0	0
R.C[+57.02146]NTAAPMWLN[+2759.00475]GTHPSSDE.G	HexNAc(8)Hex(7)	223	>sp|P07911|UROM_HUMAN Uromodulin OS=Homo sapiens OX=9606 GN=UMOD PE=1 SV=1	4745.82	0	0	0	5.91607e+07	0	0	0	0	0	0	0	0	0	0	0	0	0	0
R.C[+57.02146]NTAAPMWLN[+3405.20039]GTHPSSDE.G	HexNAc(6)Hex(9)Fuc(1)NeuAc(2)	223	>sp|P07911|UROM_HUMAN Uromodulin OS=Homo sapiens OX=9606 GN=UMOD PE=1 SV=1	5392.02	0	0	0	0	2.44095e+06	0	0	0	0	0	0	0	0	0	0	0	0	0
R.C[+57.02146]NTAAPMWLN[+3432.24767]GTHPSSDE.G	HexNAc(9)Hex(9)Fuc(1)	223	>sp|P07911|UROM_HUMAN Uromodulin OS=Homo sapiens OX=9606 GN=UMOD PE=1 SV=1	5419.07	4.36925e+06	0	0	0	0	0	0	0	0	0	0	0	0	0	0	0	0	0
R.C[+57.02146]NTAAPM[+15.99492]WLN[+1589.57138]GTHPSSDE.G	HexNAc(4)Hex(3)NeuAc(1)	223	>sp|P07911|UROM_HUMAN Uromodulin OS=Homo sapiens OX=9606 GN=UMOD PE=1 SV=1	3592.39	0	0	0	0	0	0	0	1.23509e+07	0	0	0	0	0	0	0	0	0	0
R.C[+57.02146]NTAAPM[+15.99492]WLN[+1784.63443]GTHPSSDE.G	HexNAc(4)Hex(6)	223	>sp|P07911|UROM_HUMAN Uromodulin OS=Homo sapiens OX=9606 GN=UMOD PE=1 SV=1	3787.45	0	0	0	0	1.19446e+07	0	0	0	0	0	0	0	0	0	0	0	0	0
R.C[+57.02146]NTAAPM[+15.99492]WLN[+1866.68753]GTHPSSDE.G	HexNAc(6)Hex(4)	223	>sp|P07911|UROM_HUMAN Uromodulin OS=Homo sapiens OX=9606 GN=UMOD PE=1 SV=1	3869.5	0	2.06115e+07	0	0	0	0	0	0	0	0	0	0	0	0	0	0	0	0
R.C[+57.02146]NTAAPM[+15.99492]WLN[+2149.76663]GTHPSSDE.G	HexNAc(5)Hex(7)	223	>sp|P07911|UROM_HUMAN Uromodulin OS=Homo sapiens OX=9606 GN=UMOD PE=1 SV=1	4152.58	0	1.18129e+07	0	0	0	0	0	0	0	0	0	0	0	0	0	0	0	0
R.C[+57.02146]NTAAPM[+15.99492]WLN[+2596.95192]GTHPSSDE.G	HexNAc(8)Hex(6)	223	>sp|P07911|UROM_HUMAN Uromodulin OS=Homo sapiens OX=9606 GN=UMOD PE=1 SV=1	4599.77	2.33914e+08	0	0	0	0	0	0	0	0	0	0	0	0	0	0	0	0	0
R.C[+57.02146]NTAAPM[+15.99492]WLN[+2717.97820]GTHPSSDE.G	HexNAc(7)Hex(8)	223	>sp|P07911|UROM_HUMAN Uromodulin OS=Homo sapiens OX=9606 GN=UMOD PE=1 SV=1	4720.79	0	3.34271e+08	0	0	0	0	0	0	0	0	0	0	0	0	0	0	0	0
R.C[+57.02146]NTAAPM[+15.99492]WLN[+2759.00475]GTHPSSDE.G	HexNAc(8)Hex(7)	223	>sp|P07911|UROM_HUMAN Uromodulin OS=Homo sapiens OX=9606 GN=UMOD PE=1 SV=1	4761.82	0	0	0	0	1.0076e+08	0	0	0	0	0	0	0	0	0	0	0	0	0
R.C[+57.02146]NTAAPM[+15.99492]WLN[+2921.05757]GTHPSSDE.G	HexNAc(8)Hex(8)	223	>sp|P07911|UROM_HUMAN Uromodulin OS=Homo sapiens OX=9606 GN=UMOD PE=1 SV=1	4923.87	0	4.21094e+08	0	0	0	0	0	0	0	0	0	0	0	0	0	0	0	0
R.C[+57.02146]NTAAPM[+15.99492]WLN[+3405.20039]GTHPSSDE.G	HexNAc(6)Hex(9)Fuc(1)NeuAc(2)	223	>sp|P07911|UROM_HUMAN Uromodulin OS=Homo sapiens OX=9606 GN=UMOD PE=1 SV=1	5408.02	0	0	0	0	0	0	0	0	0	0	0	7.9881e+07	0	0	0	0	0	0
R.C[+57.02146]NTAAPMWLN[+1298.47596]GTHPSSDEGIVSR.K	HexNAc(4)Hex(3)	223	>sp|P07911|UROM_HUMAN Uromodulin OS=Homo sapiens OX=9606 GN=UMOD PE=1 SV=1	3797.6	0	8.05962e+06	0	0	0	0	0	0	0	0	0	0	0	0	0	0	0	0
R.C[+57.02146]NTAAPMWLN[+1589.57138]GTHPSSDEGIVSR.K	HexNAc(4)Hex(3)NeuAc(1)	223	>sp|P07911|UROM_HUMAN Uromodulin OS=Homo sapiens OX=9606 GN=UMOD PE=1 SV=1	4088.7	0	2.52549e+07	0	0	0	0	0	0	0	0	0	0	0	0	0	0	0	0
R.C[+57.02146]NTAAPMWLN[+1622.58161]GTHPSSDEGIVSR.K	HexNAc(4)Hex(5)	223	>sp|P07911|UROM_HUMAN Uromodulin OS=Homo sapiens OX=9606 GN=UMOD PE=1 SV=1	4121.71	0	0	0	0	0	0	0	1.07053e+07	0	0	0	0	0	0	0	0	0	0
R.C[+57.02146]NTAAPMWLN[+1866.68753]GTHPSSDEGIVSR.K	HexNAc(6)Hex(4)	223	>sp|P07911|UROM_HUMAN Uromodulin OS=Homo sapiens OX=9606 GN=UMOD PE=1 SV=1	4365.81	6.68785e+06	0	0	0	0	0	0	0	0	0	0	0	0	0	0	0	0	0
R.C[+57.02146]NTAAPMWLN[+1907.71408]GTHPSSDEGIVSR.K	HexNAc(7)Hex(3)	223	>sp|P07911|UROM_HUMAN Uromodulin OS=Homo sapiens OX=9606 GN=UMOD PE=1 SV=1	4406.84	3.04989e+07	0	0	0	0	0	0	0	0	0	0	0	0	0	0	0	0	0
R.C[+57.02146]NTAAPMWLN[+2133.77171]GTHPSSDEGIVSR.K	HexNAc(5)Hex(6)Fuc(1)	223	>sp|P07911|UROM_HUMAN Uromodulin OS=Homo sapiens OX=9606 GN=UMOD PE=1 SV=1	4632.9	1.05139e+06	0	0	0	0	0	0	0	0	0	0	0	0	0	0	0	0	0
R.C[+57.02146]NTAAPMWLN[+2174.79826]GTHPSSDEGIVSR.K	HexNAc(6)Hex(5)Fuc(1)	223	>sp|P07911|UROM_HUMAN Uromodulin OS=Homo sapiens OX=9606 GN=UMOD PE=1 SV=1	4673.93	0	0	0	6.16819e+06	0	0	0	0	0	0	0	0	0	0	0	0	0	0
R.C[+57.02146]NTAAPMWLN[+2352.84600]GTHPSSDEGIVSR.K	HexNAc(6)Hex(7)	223	>sp|P07911|UROM_HUMAN Uromodulin OS=Homo sapiens OX=9606 GN=UMOD PE=1 SV=1	4851.97	0	0	0	2.10582e+07	0	0	0	0	0	0	0	0	0	0	0	0	0	0
R.C[+57.02146]NTAAPMWLN[+2459.93073]GTHPSSDEGIVSR.K	HexNAc(9)Hex(3)Fuc(1)	223	>sp|P07911|UROM_HUMAN Uromodulin OS=Homo sapiens OX=9606 GN=UMOD PE=1 SV=1	4959.06	0	3.49548e+07	0	0	0	0	0	0	0	0	0	0	0	0	0	0	0	0
R.C[+57.02146]NTAAPMWLN[+2596.95192]GTHPSSDEGIVSR.K	HexNAc(8)Hex(6)	223	>sp|P07911|UROM_HUMAN Uromodulin OS=Homo sapiens OX=9606 GN=UMOD PE=1 SV=1	5096.08	5.42774e+07	0	0	0	0	0	0	0	0	0	0	0	0	0	0	0	0	0
R.C[+57.02146]NTAAPMWLN[+3067.11548]GTHPSSDEGIVSR.K	HexNAc(8)Hex(8)Fuc(1)	223	>sp|P07911|UROM_HUMAN Uromodulin OS=Homo sapiens OX=9606 GN=UMOD PE=1 SV=1	5566.24	0	0	0	0	2.00717e+08	0	0	0	0	0	0	0	0	0	0	0	0	0
R.C[+57.02146]NTAAPMWLN[+3594.30050]GTHPSSDEGIVSR.K	HexNAc(9)Hex(10)Fuc(1)	223	>sp|P07911|UROM_HUMAN Uromodulin OS=Homo sapiens OX=9606 GN=UMOD PE=1 SV=1	6093.43	0	0	0	0	4.73552e+07	0	0	0	0	0	0	0	0	0	0	0	0	0
R.C[+57.02146]NTAAPMWLN[+3797.37987]GTHPSSDEGIVSR.K	HexNAc(10)Hex(10)Fuc(1)	223	>sp|P07911|UROM_HUMAN Uromodulin OS=Homo sapiens OX=9606 GN=UMOD PE=1 SV=1	6296.51	0	0	8.29873e+07	0	0	0	0	0	0	0	0	0	0	0	0	0	0	0
R.C[+57.02146]NTAAPMWLN[+4102.45455]GTHPSSDEGIVSR.K	HexNAc(8)Hex(9)Fuc(1)NeuAc(3)	223	>sp|P07911|UROM_HUMAN Uromodulin OS=Homo sapiens OX=9606 GN=UMOD PE=1 SV=1	6601.58	0	0	0	0	1.87893e+08	0	0	0	0	0	0	0	0	0	0	0	0	0
R.C[+57.02146]NTAAPM[+15.99492]WLN[+1589.57138]GTHPSSDEGIVSR.K	HexNAc(4)Hex(3)NeuAc(1)	223	>sp|P07911|UROM_HUMAN Uromodulin OS=Homo sapiens OX=9606 GN=UMOD PE=1 SV=1	4104.69	0	3.01985e+08	0	0	0	0	0	0	0	0	0	0	0	0	0	0	0	0
R.C[+57.02146]NTAAPM[+15.99492]WLN[+1872.65048]GTHPSSDEGIVSR.K	HexNAc(3)Hex(6)NeuAc(1)	223	>sp|P07911|UROM_HUMAN Uromodulin OS=Homo sapiens OX=9606 GN=UMOD PE=1 SV=1	4387.77	0	0	0	0	1.44825e+06	0	0	0	0	0	0	0	0	0	0	0	0	0
R.C[+57.02146]NTAAPM[+15.99492]WLN[+1897.68211]GTHPSSDEGIVSR.K	HexNAc(4)Hex(4)Fuc(1)NeuAc(1)	223	>sp|P07911|UROM_HUMAN Uromodulin OS=Homo sapiens OX=9606 GN=UMOD PE=1 SV=1	4412.8	0	0	0	0	0	0	0	0	0	0	0	2.254e+07	0	0	0	0	0	0
R.C[+57.02146]NTAAPM[+15.99492]WLN[+2018.70838]GTHPSSDEGIVSR.K	HexNAc(3)Hex(6)Fuc(1)NeuAc(1)	223	>sp|P07911|UROM_HUMAN Uromodulin OS=Homo sapiens OX=9606 GN=UMOD PE=1 SV=1	4533.83	0	1.84464e+06	0	0	0	0	0	0	0	0	0	0	0	0	0	0	0	0
R.C[+57.02146]NTAAPM[+15.99492]WLN[+2215.82481]GTHPSSDEGIVSR.K	HexNAc(7)Hex(4)Fuc(1)	223	>sp|P07911|UROM_HUMAN Uromodulin OS=Homo sapiens OX=9606 GN=UMOD PE=1 SV=1	4730.95	0	0	0	0	0	0	0	1.15284e+07	0	0	0	0	0	0	0	0	0	0
R.C[+57.02146]NTAAPM[+15.99492]WLN[+2272.84627]GTHPSSDEGIVSR.K	HexNAc(8)Hex(4)	223	>sp|P07911|UROM_HUMAN Uromodulin OS=Homo sapiens OX=9606 GN=UMOD PE=1 SV=1	4787.97	0	0	0	0	1.29015e+07	0	0	0	0	0	0	0	0	0	0	0	0	0
R.C[+57.02146]NTAAPM[+15.99492]WLN[+2457.87736]GTHPSSDEGIVSR.K	HexNAc(5)Hex(8)Fuc(1)	223	>sp|P07911|UROM_HUMAN Uromodulin OS=Homo sapiens OX=9606 GN=UMOD PE=1 SV=1	4973	0	4.95514e+06	0	0	0	0	0	0	0	0	0	0	0	0	0	0	0	0
R.C[+57.02146]NTAAPM[+15.99492]WLN[+2555.92537]GTHPSSDEGIVSR.K	HexNAc(7)Hex(7)	223	>sp|P07911|UROM_HUMAN Uromodulin OS=Homo sapiens OX=9606 GN=UMOD PE=1 SV=1	5071.05	0	0	0	0	0	0	6.46275e+08	0	0	0	0	0	0	0	0	0	0	0
R.C[+57.02146]NTAAPM[+15.99492]WLN[+2596.95192]GTHPSSDEGIVSR.K	HexNAc(8)Hex(6)	223	>sp|P07911|UROM_HUMAN Uromodulin OS=Homo sapiens OX=9606 GN=UMOD PE=1 SV=1	5112.07	0	0	0	2.42715e+08	0	0	0	0	0	0	0	0	0	0	0	0	0	0
R.C[+57.02146]NTAAPM[+15.99492]WLN[+2717.97820]GTHPSSDEGIVSR.K	HexNAc(7)Hex(8)	223	>sp|P07911|UROM_HUMAN Uromodulin OS=Homo sapiens OX=9606 GN=UMOD PE=1 SV=1	5233.1	5.37399e+07	0	0	0	0	0	0	0	0	0	0	0	0	0	0	0	0	0
R.C[+57.02146]NTAAPM[+15.99492]WLN[+2759.00475]GTHPSSDEGIVSR.K	HexNAc(8)Hex(7)	223	>sp|P07911|UROM_HUMAN Uromodulin OS=Homo sapiens OX=9606 GN=UMOD PE=1 SV=1	5274.13	0	0	0	0	0	0	0	7.55747e+07	0	0	0	0	0	0	0	0	0	0
R.C[+57.02146]NTAAPM[+15.99492]WLN[+3147.11520]GTHPSSDEGIVSR.K	HexNAc(6)Hex(11)Fuc(1)	223	>sp|P07911|UROM_HUMAN Uromodulin OS=Homo sapiens OX=9606 GN=UMOD PE=1 SV=1	5662.24	0	0	0	0	1.55771e+07	0	0	0	0	0	0	0	0	0	0	0	0	0
R.C[+57.02146]NTAAPM[+15.99492]WLN[+3405.20039]GTHPSSDEGIVSR.K	HexNAc(6)Hex(9)Fuc(1)NeuAc(2)	223	>sp|P07911|UROM_HUMAN Uromodulin OS=Homo sapiens OX=9606 GN=UMOD PE=1 SV=1	5920.32	0	0	1.01929e+07	0	0	0	0	0	0	0	0	0	0	0	0	0	0	0
R.C[+57.02146]NTAAPM[+15.99492]WLN[+4028.41777]GTHPSSDEGIVSR.K	HexNAc(7)Hex(8)Fuc(1)NeuAc(4)	223	>sp|P07911|UROM_HUMAN Uromodulin OS=Homo sapiens OX=9606 GN=UMOD PE=1 SV=1	6543.54	0	0	0	0	5.45145e+07	0	0	0	0	0	0	0	0	0	0	0	0	0
R.C[+57.02146]NTAAPMWLN[+3372.19016]GTHPSSDEGIVSRK.A	HexNAc(6)Hex(7)Fuc(1)NeuAc(3)	223	>sp|P07911|UROM_HUMAN Uromodulin OS=Homo sapiens OX=9606 GN=UMOD PE=1 SV=1	5999.41	0	0	0	7.27393e+06	0	0	0	0	0	0	0	0	0	0	0	0	0	0
R.C[+57.02146]NTAAPMWLN[+3405.20039]GTHPSSDEGIVSRK.A	HexNAc(6)Hex(9)Fuc(1)NeuAc(2)	223	>sp|P07911|UROM_HUMAN Uromodulin OS=Homo sapiens OX=9606 GN=UMOD PE=1 SV=1	6032.42	0	0	0	973871	0	0	0	0	0	0	0	0	0	0	0	0	0	0
R.C[+57.02146]NTAAPMWLN[+1589.57138]GTHPSSDE.G	HexNAc(4)Hex(3)NeuAc(1)	223	>sp|P07911|UROM_HUMAN Uromodulin OS=Homo sapiens OX=9606 GN=UMOD PE=1 SV=1	3576.39	0	0	0	0	9.52872e+06	0	0	0	0	0	0	0	0	0	0	0	0	0
R.C[+57.02146]NTAAPMWLN[+2174.79826]GTHPSSDE.G	HexNAc(6)Hex(5)Fuc(1)	223	>sp|P07911|UROM_HUMAN Uromodulin OS=Homo sapiens OX=9606 GN=UMOD PE=1 SV=1	4161.62	0	0	0	8.38438e+07	0	0	0	0	0	0	0	0	0	0	0	0	0	0
R.C[+57.02146]NTAAPMWLN[+2311.81945]GTHPSSDE.G	HexNAc(5)Hex(8)	223	>sp|P07911|UROM_HUMAN Uromodulin OS=Homo sapiens OX=9606 GN=UMOD PE=1 SV=1	4298.64	1.27733e+07	0	0	0	0	0	0	0	0	0	0	0	0	0	0	0	0	0
R.C[+57.02146]NTAAPMWLN[+2352.84600]GTHPSSDE.G	HexNAc(6)Hex(7)	223	>sp|P07911|UROM_HUMAN Uromodulin OS=Homo sapiens OX=9606 GN=UMOD PE=1 SV=1	4339.67	0	0	0	3.69687e+07	0	0	0	0	0	0	0	0	0	0	0	0	0	0
R.C[+57.02146]NTAAPMWLN[+2457.87736]GTHPSSDE.G	HexNAc(5)Hex(8)Fuc(1)	223	>sp|P07911|UROM_HUMAN Uromodulin OS=Homo sapiens OX=9606 GN=UMOD PE=1 SV=1	4444.7	3.08008e+08	0	0	0	0	0	0	0	0	0	0	0	0	0	0	0	0	0
R.C[+57.02146]NTAAPMWLN[+2619.93018]GTHPSSDE.G	HexNAc(5)Hex(9)Fuc(1)	223	>sp|P07911|UROM_HUMAN Uromodulin OS=Homo sapiens OX=9606 GN=UMOD PE=1 SV=1	4606.75	0	0	0	2.00379e+08	0	0	0	0	0	0	0	0	0	0	0	0	0	0
R.C[+57.02146]NTAAPMWLN[+3276.15780]GTHPSSDE.G	HexNAc(6)Hex(10)Fuc(1)NeuAc(1)	223	>sp|P07911|UROM_HUMAN Uromodulin OS=Homo sapiens OX=9606 GN=UMOD PE=1 SV=1	5262.98	0	0	0	0	0	0	0	0	60736244	0	0	0	0	0	0	0	0	0
R.C[+57.02146]NTAAPMWLN[+3446.22694]GTHPSSDE.G	HexNAc(7)Hex(8)Fuc(1)NeuAc(2)	223	>sp|P07911|UROM_HUMAN Uromodulin OS=Homo sapiens OX=9606 GN=UMOD PE=1 SV=1	5433.05	0	0	0	0	1.25595e+06	0	0	0	0	0	0	0	0	0	0	0	0	0
R.C[+57.02146]NTAAPM[+15.99492]WLN[+1663.60816]GTHPSSDE.G	HexNAc(5)Hex(4)	223	>sp|P07911|UROM_HUMAN Uromodulin OS=Homo sapiens OX=9606 GN=UMOD PE=1 SV=1	3666.42	0	16565056	0	0	0	0	0	0	0	0	0	0	0	0	0	0	0	0
R.C[+57.02146]NTAAPM[+15.99492]WLN[+1751.62420]GTHPSSDE.G	HexNAc(4)Hex(4)NeuAc(1)	223	>sp|P07911|UROM_HUMAN Uromodulin OS=Homo sapiens OX=9606 GN=UMOD PE=1 SV=1	3754.44	0	0	0	2.88047e+07	0	0	0	0	0	0	0	0	0	0	0	0	0	0
R.C[+57.02146]NTAAPM[+15.99492]WLN[+2116.75640]GTHPSSDE.G	HexNAc(5)Hex(5)NeuAc(1)	223	>sp|P07911|UROM_HUMAN Uromodulin OS=Homo sapiens OX=9606 GN=UMOD PE=1 SV=1	4119.57	23183682	0	0	0	0	0	0	0	0	0	0	0	0	0	0	0	0	0
R.C[+57.02146]NTAAPM[+15.99492]WLN[+2553.90972]GTHPSSDE.G	HexNAc(5)Hex(5)Fuc(1)NeuAc(2)	223	>sp|P07911|UROM_HUMAN Uromodulin OS=Homo sapiens OX=9606 GN=UMOD PE=1 SV=1	4556.72	0	0	0	0	0	7.31711e+06	0	0	0	0	0	0	0	0	0	0	0	0
R.C[+57.02146]NTAAPM[+15.99492]WLN[+2643.94142]GTHPSSDE.G	HexNAc(6)Hex(7)NeuAc(1)	223	>sp|P07911|UROM_HUMAN Uromodulin OS=Homo sapiens OX=9606 GN=UMOD PE=1 SV=1	4646.76	0	0	0	0	0	0	0	22483832	0	0	0	0	0	0	0	0	0	0
R.C[+57.02146]NTAAPM[+15.99492]WLN[+2676.95165]GTHPSSDE.G	HexNAc(6)Hex(9)	223	>sp|P07911|UROM_HUMAN Uromodulin OS=Homo sapiens OX=9606 GN=UMOD PE=1 SV=1	4679.77	0	0	0	0	0	0	0	64746140	0	0	0	0	0	0	0	0	0	0
R.C[+57.02146]NTAAPM[+15.99492]WLN[+2772.98401]GTHPSSDE.G	HexNAc(6)Hex(6)NeuAc(2)	223	>sp|P07911|UROM_HUMAN Uromodulin OS=Homo sapiens OX=9606 GN=UMOD PE=1 SV=1	4775.8	0	0	0	0	0	1.7927e+06	0	0	0	0	0	0	0	0	0	0	0	0
R.C[+57.02146]NTAAPM[+15.99492]WLN[+2789.99933]GTHPSSDE.G	HexNAc(6)Hex(7)Fuc(1)NeuAc(1)	223	>sp|P07911|UROM_HUMAN Uromodulin OS=Homo sapiens OX=9606 GN=UMOD PE=1 SV=1	4792.81	0	0	0	0	0	0	0	201729392	0	0	0	0	0	0	0	0	0	0
R.C[+57.02146]NTAAPM[+15.99492]WLN[+3737.32236]GTHPSSDE.G	HexNAc(7)Hex(8)Fuc(1)NeuAc(3)	223	>sp|P07911|UROM_HUMAN Uromodulin OS=Homo sapiens OX=9606 GN=UMOD PE=1 SV=1	5740.14	0	0	0	0	0	0	0	0	0	0	0	3.00234e+06	0	0	0	0	0	0
R.C[+57.02146]NTAAPMWLN[+1930.69234]GTHPSSDEGIVSR.K	HexNAc(4)Hex(6)Fuc(1)	223	>sp|P07911|UROM_HUMAN Uromodulin OS=Homo sapiens OX=9606 GN=UMOD PE=1 SV=1	4429.82	0	0	0	0	0	0	0	34658212	0	0	0	0	0	0	0	0	0	0
R.C[+57.02146]NTAAPMWLN[+1946.68725]GTHPSSDEGIVSR.K	HexNAc(4)Hex(7)	223	>sp|P07911|UROM_HUMAN Uromodulin OS=Homo sapiens OX=9606 GN=UMOD PE=1 SV=1	4445.81	0	39402756	0	0	0	0	0	0	0	0	0	0	0	0	0	0	0	0
R.C[+57.02146]NTAAPMWLN[+2026.68698]GTHPSSDEGIVSR.K	HexNAc(2)Hex(10)	223	>sp|P07911|UROM_HUMAN Uromodulin OS=Homo sapiens OX=9606 GN=UMOD PE=1 SV=1	4525.81	0	0	0	0	0	0	0	40521308	0	0	0	0	0	0	0	0	0	0
R.C[+57.02146]NTAAPMWLN[+2149.76663]GTHPSSDEGIVSR.K	HexNAc(5)Hex(7)	223	>sp|P07911|UROM_HUMAN Uromodulin OS=Homo sapiens OX=9606 GN=UMOD PE=1 SV=1	4648.89	0	194041104	0	0	0	0	0	0	0	0	0	0	0	0	0	0	0	0
R.C[+57.02146]NTAAPMWLN[+2336.85109]GTHPSSDEGIVSR.K	HexNAc(6)Hex(6)Fuc(1)	223	>sp|P07911|UROM_HUMAN Uromodulin OS=Homo sapiens OX=9606 GN=UMOD PE=1 SV=1	4835.98	0	1.47026e+08	0	0	0	0	0	0	0	0	0	0	0	0	0	0	0	0
R.C[+57.02146]NTAAPMWLN[+2619.93018]GTHPSSDEGIVSR.K	HexNAc(5)Hex(9)Fuc(1)	223	>sp|P07911|UROM_HUMAN Uromodulin OS=Homo sapiens OX=9606 GN=UMOD PE=1 SV=1	5119.06	0	0	0	189210	0	0	0	0	0	0	0	0	0	0	0	0	0	0
R.C[+57.02146]NTAAPMWLN[+3009.07361]GTHPSSDEGIVSR.K	HexNAc(7)Hex(8)NeuAc(1)	223	>sp|P07911|UROM_HUMAN Uromodulin OS=Homo sapiens OX=9606 GN=UMOD PE=1 SV=1	5508.2	0	0	0	0	0	7.32433e+07	0	0	0	0	0	0	0	0	0	0	0	0
R.C[+57.02146]NTAAPM[+15.99492]WLN[+1946.68725]GTHPSSDEGIVSR.K	HexNAc(4)Hex(7)	223	>sp|P07911|UROM_HUMAN Uromodulin OS=Homo sapiens OX=9606 GN=UMOD PE=1 SV=1	4461.81	0	0	0	0	0	0	0	1.417e+07	0	0	0	0	0	0	0	0	0	0
R.C[+57.02146]NTAAPM[+15.99492]WLN[+1971.71889]GTHPSSDEGIVSR.K	HexNAc(5)Hex(5)Fuc(1)	223	>sp|P07911|UROM_HUMAN Uromodulin OS=Homo sapiens OX=9606 GN=UMOD PE=1 SV=1	4486.84	0	0	0	0	0	0	0	0	0	0	0	2.80497e+06	0	0	0	0	0	0
R.C[+57.02146]NTAAPM[+15.99492]WLN[+2092.74516]GTHPSSDEGIVSR.K	HexNAc(4)Hex(7)Fuc(1)	223	>sp|P07911|UROM_HUMAN Uromodulin OS=Homo sapiens OX=9606 GN=UMOD PE=1 SV=1	4607.87	0	0	0	0	0	0	0	62325364	0	0	0	0	0	0	0	0	0	0
R.C[+57.02146]NTAAPM[+15.99492]WLN[+2116.75640]GTHPSSDEGIVSR.K	HexNAc(5)Hex(5)NeuAc(1)	223	>sp|P07911|UROM_HUMAN Uromodulin OS=Homo sapiens OX=9606 GN=UMOD PE=1 SV=1	4631.88	25436066	0	0	0	0	0	0	0	0	0	0	0	0	0	0	0	0	0
R.C[+57.02146]NTAAPM[+15.99492]WLN[+2627.94650]GTHPSSDEGIVSR.K	HexNAc(6)Hex(6)Fuc(1)NeuAc(1)	223	>sp|P07911|UROM_HUMAN Uromodulin OS=Homo sapiens OX=9606 GN=UMOD PE=1 SV=1	5143.07	0	0	0	0	0	0	0	0	0	0	0	15839262	0	0	0	0	0	0
R.C[+57.02146]NTAAPM[+15.99492]WLN[+2789.99933]GTHPSSDEGIVSR.K	HexNAc(6)Hex(7)Fuc(1)NeuAc(1)	223	>sp|P07911|UROM_HUMAN Uromodulin OS=Homo sapiens OX=9606 GN=UMOD PE=1 SV=1	5305.12	0	0	0	0	0	735240	0	0	0	0	0	0	0	0	0	0	0	0
R.C[+57.02146]NTAAPM[+15.99492]WLN[+3276.15780]GTHPSSDEGIVSR.K	HexNAc(6)Hex(10)Fuc(1)NeuAc(1)	223	>sp|P07911|UROM_HUMAN Uromodulin OS=Homo sapiens OX=9606 GN=UMOD PE=1 SV=1	5791.28	0	0	0	0	0	0	0	0	0	0	0	6.32301e+07	0	0	0	0	0	0
R.C[+57.02146]NTAAPM[+15.99492]WLN[+3446.22694]GTHPSSDEGIVSR.K	HexNAc(7)Hex(8)Fuc(1)NeuAc(2)	223	>sp|P07911|UROM_HUMAN Uromodulin OS=Homo sapiens OX=9606 GN=UMOD PE=1 SV=1	5961.35	0	0	0	0	0	0	0	0	0	0	0	2.47642e+06	0	0	0	0	0	0
K.AC[+57.02146]AGGYYVYN[+1419.50224]LTAPPE.C	HexNAc(3)Hex(5)	266	>sp|P07911|UROM_HUMAN Uromodulin OS=Homo sapiens OX=9606 GN=UMOD PE=1 SV=1	3164.28	0	0	0	7.23149e+07	0	0	0	0	0	0	0	0	0	0	0	0	0	0
K.AC[+57.02146]AGGYYVYN[+1444.53387]LTAPPE.C	HexNAc(4)Hex(3)Fuc(1)	266	>sp|P07911|UROM_HUMAN Uromodulin OS=Homo sapiens OX=9606 GN=UMOD PE=1 SV=1	3189.31	0	0	0	0	0	0	1.03935e+08	0	0	0	0	0	0	0	0	0	0	0
K.AC[+57.02146]AGGYYVYN[+1589.57138]LTAPPE.C	HexNAc(4)Hex(3)NeuAc(1)	266	>sp|P07911|UROM_HUMAN Uromodulin OS=Homo sapiens OX=9606 GN=UMOD PE=1 SV=1	3334.35	0	0	0	0	0	0	1.23954e+08	0	0	0	0	0	0	0	0	0	0	0
K.AC[+57.02146]AGGYYVYN[+1913.67702]LTAPPE.C	HexNAc(4)Hex(5)NeuAc(1)	266	>sp|P07911|UROM_HUMAN Uromodulin OS=Homo sapiens OX=9606 GN=UMOD PE=1 SV=1	3658.45	0	0	0	0	0	0	0	2.24099e+07	0	0	0	0	0	0	0	0	0	0
K.AC[+57.02146]AGGYYVYN[+2204.77244]LTAPPE.C	HexNAc(4)Hex(5)NeuAc(2)	266	>sp|P07911|UROM_HUMAN Uromodulin OS=Homo sapiens OX=9606 GN=UMOD PE=1 SV=1	3949.55	0	0	0	0	0	0	2.02921e+07	0	0	0	0	0	0	0	0	0	0	0
K.AC[+57.02146]AGGYYVYN[+2789.99933]LTAPPE.C	HexNAc(6)Hex(7)Fuc(1)NeuAc(1)	266	>sp|P07911|UROM_HUMAN Uromodulin OS=Homo sapiens OX=9606 GN=UMOD PE=1 SV=1	4534.78	0	0	0	4.47592e+07	0	0	0	0	0	0	0	0	0	0	0	0	0	0
K.AC[+57.02146]AGGYYVYN[+2935.03683]LTAPPE.C	HexNAc(6)Hex(7)NeuAc(2)	266	>sp|P07911|UROM_HUMAN Uromodulin OS=Homo sapiens OX=9606 GN=UMOD PE=1 SV=1	4679.81	0	0	0	0	0	0	0	7.65175e+06	0	0	0	0	0	0	0	0	0	0
K.AC[+57.02146]AGGYYVYN[+2946.08920]LTAPPE.C	HexNAc(9)Hex(6)Fuc(1)	266	>sp|P07911|UROM_HUMAN Uromodulin OS=Homo sapiens OX=9606 GN=UMOD PE=1 SV=1	4690.87	0	0	1.021e+08	0	0	0	0	0	0	0	0	0	0	0	0	0	0	0
K.AC[+57.02146]AGGYYVYN[+3405.20039]LTAPPE.C	HexNAc(6)Hex(9)Fuc(1)NeuAc(2)	266	>sp|P07911|UROM_HUMAN Uromodulin OS=Homo sapiens OX=9606 GN=UMOD PE=1 SV=1	5149.98	0	0	0	0	0	0	0	1.44853e+08	0	0	0	0	0	0	0	0	0	0
K.AC[+57.02146]AGGYYVYN[+4758.68216]LTAPPE.C	HexNAc(9)Hex(10)Fuc(1)NeuAc(4)	266	>sp|P07911|UROM_HUMAN Uromodulin OS=Homo sapiens OX=9606 GN=UMOD PE=1 SV=1	6503.46	0	0	0	0	1.75127e+07	0	0	0	0	0	0	0	0	0	0	0	0	0
K.AC[+57.02146]AGGYYVYN[+1864.63416]LTAPPEC[+57.02146]HLAYC[+57.02146]TDPSSVE.G	HexNAc(2)Hex(9)	266	>sp|P07911|UROM_HUMAN Uromodulin OS=Homo sapiens OX=9606 GN=UMOD PE=1 SV=1	5129.02	0	1.24569e+08	0	0	0	0	0	0	0	0	0	0	0	0	0	0	0	0
K.AC[+57.02146]AGGYYVYN[+2149.76663]LTAPPEC[+57.02146]HLAYC[+57.02146]TDPSSVE.G	HexNAc(5)Hex(7)	266	>sp|P07911|UROM_HUMAN Uromodulin OS=Homo sapiens OX=9606 GN=UMOD PE=1 SV=1	5414.15	0	0	0	0	0	0	0	0	7.6952e+07	0	0	0	0	0	0	0	0	0
K.AC[+57.02146]AGGYYVYN[+2245.79899]LTAPPEC[+57.02146]HLAYC[+57.02146]TDPSSVE.G	HexNAc(5)Hex(4)NeuAc(2)	266	>sp|P07911|UROM_HUMAN Uromodulin OS=Homo sapiens OX=9606 GN=UMOD PE=1 SV=1	5510.18	0	1.07159e+08	0	0	0	0	0	0	0	0	0	0	0	0	0	0	0	0
K.AC[+57.02146]AGGYYVYN[+2278.80922]LTAPPEC[+57.02146]HLAYC[+57.02146]TDPSSVE.G	HexNAc(5)Hex(6)NeuAc(1)	266	>sp|P07911|UROM_HUMAN Uromodulin OS=Homo sapiens OX=9606 GN=UMOD PE=1 SV=1	5543.19	0	0	0	0	0	0	0	1.04147e+08	0	0	0	0	0	0	0	0	0	0
K.AC[+57.02146]AGGYYVYN[+2350.83035]LTAPPEC[+57.02146]HLAYC[+57.02146]TDPSSVE.G	HexNAc(4)Hex(5)Fuc(1)NeuAc(2)	266	>sp|P07911|UROM_HUMAN Uromodulin OS=Homo sapiens OX=9606 GN=UMOD PE=1 SV=1	5615.21	0	0	4.61275e+07	0	0	0	0	0	0	0	0	0	0	0	0	0	0	0
K.AC[+57.02146]AGGYYVYN[+2465.89368]LTAPPEC[+57.02146]HLAYC[+57.02146]TDPSSVE.G	HexNAc(6)Hex(5)Fuc(1)NeuAc(1)	266	>sp|P07911|UROM_HUMAN Uromodulin OS=Homo sapiens OX=9606 GN=UMOD PE=1 SV=1	5730.28	0	4.62573e+06	0	0	0	0	0	0	0	0	0	0	0	0	0	0	0	0
K.AC[+57.02146]AGGYYVYN[+2946.08920]LTAPPEC[+57.02146]HLAYC[+57.02146]TDPSSVE.G	HexNAc(9)Hex(6)Fuc(1)	266	>sp|P07911|UROM_HUMAN Uromodulin OS=Homo sapiens OX=9606 GN=UMOD PE=1 SV=1	6210.47	0	0	1.96372e+07	0	0	0	0	0	0	0	0	0	0	0	0	0	0	0
K.AC[+57.02146]AGGYYVYN[+3165.16349]LTAPPEC[+57.02146]HLAYC[+57.02146]TDPSSVE.G	HexNAc(10)Hex(7)	266	>sp|P07911|UROM_HUMAN Uromodulin OS=Homo sapiens OX=9606 GN=UMOD PE=1 SV=1	6429.55	0	0	0	0	0	0	7.76141e+08	0	0	0	0	0	0	0	0	0	0	0
K.AC[+57.02146]AGGYYVYN[+3284.17411]LTAPPEC[+57.02146]HLAYC[+57.02146]TDPSSVE.G	HexNAc(7)Hex(7)Fuc(1)NeuAc(2)	266	>sp|P07911|UROM_HUMAN Uromodulin OS=Homo sapiens OX=9606 GN=UMOD PE=1 SV=1	6548.56	0	0	4.84558e+06	0	0	0	0	0	0	0	0	0	0	0	0	0	0	0
K.AC[+57.02146]AGGYYVYN[+3448.24259]LTAPPEC[+57.02146]HLAYC[+57.02146]TDPSSVE.G	HexNAc(9)Hex(10)	266	>sp|P07911|UROM_HUMAN Uromodulin OS=Homo sapiens OX=9606 GN=UMOD PE=1 SV=1	6712.63	8.17708e+06	0	0	0	0	0	0	0	0	0	0	0	0	0	0	0	0	0
K.AC[+57.02146]AGGYYVYN[+1444.53387]LTAPPEC[+57.02146]HLAYC[+57.02146]TDPSSVEGTC[+57.02146]E.E	HexNAc(4)Hex(3)Fuc(1)	266	>sp|P07911|UROM_HUMAN Uromodulin OS=Homo sapiens OX=9606 GN=UMOD PE=1 SV=1	5156.06	0	0	0	3.243e+07	0	0	0	0	0	0	0	0	0	0	0	0	0	0
K.AC[+57.02146]AGGYYVYN[+1565.56014]LTAPPEC[+57.02146]HLAYC[+57.02146]TDPSSVEGTC[+57.02146]E.E	HexNAc(3)Hex(5)Fuc(1)	266	>sp|P07911|UROM_HUMAN Uromodulin OS=Homo sapiens OX=9606 GN=UMOD PE=1 SV=1	5277.09	1.76316e+08	0	0	0	0	0	0	0	0	0	0	0	0	0	0	0	0	0
K.AC[+57.02146]AGGYYVYN[+1702.58133]LTAPPEC[+57.02146]HLAYC[+57.02146]TDPSSVEGTC[+57.02146]E.E	HexNAc(2)Hex(8)	266	>sp|P07911|UROM_HUMAN Uromodulin OS=Homo sapiens OX=9606 GN=UMOD PE=1 SV=1	5414.11	0	0	0	0	1.52554e+08	0	0	0	0	0	0	0	0	0	0	0	0	0
K.AC[+57.02146]AGGYYVYN[+1727.61297]LTAPPEC[+57.02146]HLAYC[+57.02146]TDPSSVEGTC[+57.02146]E.E	HexNAc(3)Hex(6)Fuc(1)	266	>sp|P07911|UROM_HUMAN Uromodulin OS=Homo sapiens OX=9606 GN=UMOD PE=1 SV=1	5439.14	0	0	0	1.38881e+07	0	0	0	0	0	0	0	0	0	0	0	0	0	0
K.AC[+57.02146]AGGYYVYN[+1866.68753]LTAPPEC[+57.02146]HLAYC[+57.02146]TDPSSVEGTC[+57.02146]E.E	HexNAc(6)Hex(4)	266	>sp|P07911|UROM_HUMAN Uromodulin OS=Homo sapiens OX=9606 GN=UMOD PE=1 SV=1	5578.21	0	0	0	0	0	1.03459e+07	0	0	0	0	0	0	0	0	0	0	0	0
K.AC[+57.02146]AGGYYVYN[+1897.68211]LTAPPEC[+57.02146]HLAYC[+57.02146]TDPSSVEGTC[+57.02146]E.E	HexNAc(4)Hex(4)Fuc(1)NeuAc(1)	266	>sp|P07911|UROM_HUMAN Uromodulin OS=Homo sapiens OX=9606 GN=UMOD PE=1 SV=1	5609.21	0	0	0	0	708283	0	0	0	0	0	0	0	0	0	0	0	0	0
K.AC[+57.02146]AGGYYVYN[+2245.79899]LTAPPEC[+57.02146]HLAYC[+57.02146]TDPSSVEGTC[+57.02146]E.E	HexNAc(5)Hex(4)NeuAc(2)	266	>sp|P07911|UROM_HUMAN Uromodulin OS=Homo sapiens OX=9606 GN=UMOD PE=1 SV=1	5957.33	0	0	0	0	0	0	0	0	4.52722e+07	0	0	0	0	0	0	0	0	0
K.AC[+57.02146]AGGYYVYN[+2262.81431]LTAPPEC[+57.02146]HLAYC[+57.02146]TDPSSVEGTC[+57.02146]E.E	HexNAc(5)Hex(5)Fuc(1)NeuAc(1)	266	>sp|P07911|UROM_HUMAN Uromodulin OS=Homo sapiens OX=9606 GN=UMOD PE=1 SV=1	5974.34	8122976	0	0	0	0	0	0	0	0	0	0	0	0	0	0	0	0	0
K.AC[+57.02146]AGGYYVYN[+2553.90972]LTAPPEC[+57.02146]HLAYC[+57.02146]TDPSSVEGTC[+57.02146]E.E	HexNAc(5)Hex(5)Fuc(1)NeuAc(2)	266	>sp|P07911|UROM_HUMAN Uromodulin OS=Homo sapiens OX=9606 GN=UMOD PE=1 SV=1	6265.44	0	0	0	3.44961e+08	0	0	0	0	0	0	0	0	0	0	0	0	0	0
K.AC[+57.02146]AGGYYVYN[+2569.90464]LTAPPEC[+57.02146]HLAYC[+57.02146]TDPSSVEGTC[+57.02146]E.E	HexNAc(5)Hex(6)NeuAc(2)	266	>sp|P07911|UROM_HUMAN Uromodulin OS=Homo sapiens OX=9606 GN=UMOD PE=1 SV=1	6281.43	0	0	0	2.77095e+07	0	0	0	0	0	0	0	0	0	0	0	0	0	0
K.AC[+57.02146]AGGYYVYN[+2596.95192]LTAPPEC[+57.02146]HLAYC[+57.02146]TDPSSVEGTC[+57.02146]E.E	HexNAc(8)Hex(6)	266	>sp|P07911|UROM_HUMAN Uromodulin OS=Homo sapiens OX=9606 GN=UMOD PE=1 SV=1	6308.48	0	0	0	0	0	1.66841e+08	0	0	0	0	0	0	0	0	0	0	0	0
K.AC[+57.02146]AGGYYVYN[+2627.94650]LTAPPEC[+57.02146]HLAYC[+57.02146]TDPSSVEGTC[+57.02146]E.E	HexNAc(6)Hex(6)Fuc(1)NeuAc(1)	266	>sp|P07911|UROM_HUMAN Uromodulin OS=Homo sapiens OX=9606 GN=UMOD PE=1 SV=1	6339.47	0	0	1.89853e+07	0	0	0	0	0	0	0	0	0	0	0	0	0	0	0
K.AC[+57.02146]AGGYYVYN[+2864.03611]LTAPPEC[+57.02146]HLAYC[+57.02146]TDPSSVEGTC[+57.02146]E.E	HexNAc(7)Hex(8)Fuc(1)	266	>sp|P07911|UROM_HUMAN Uromodulin OS=Homo sapiens OX=9606 GN=UMOD PE=1 SV=1	6575.56	0	0	1.02289e+07	0	0	0	0	0	0	0	0	0	0	0	0	0	0	0
K.AC[+57.02146]AGGYYVYN[+2952.05215]LTAPPEC[+57.02146]HLAYC[+57.02146]TDPSSVEGTC[+57.02146]E.E	HexNAc(6)Hex(8)Fuc(1)NeuAc(1)	266	>sp|P07911|UROM_HUMAN Uromodulin OS=Homo sapiens OX=9606 GN=UMOD PE=1 SV=1	6663.58	0	0	0	0	15194685	0	0	0	0	0	0	0	0	0	0	0	0	0
K.AC[+57.02146]AGGYYVYN[+3067.11548]LTAPPEC[+57.02146]HLAYC[+57.02146]TDPSSVEGTC[+57.02146]E.E	HexNAc(8)Hex(8)Fuc(1)	266	>sp|P07911|UROM_HUMAN Uromodulin OS=Homo sapiens OX=9606 GN=UMOD PE=1 SV=1	6778.64	0	0	0	0	4.44017e+07	0	0	0	0	0	0	0	0	0	0	0	0	0
K.AC[+57.02146]AGGYYVYN[+3229.16830]LTAPPEC[+57.02146]HLAYC[+57.02146]TDPSSVEGTC[+57.02146]E.E	HexNAc(8)Hex(9)Fuc(1)	266	>sp|P07911|UROM_HUMAN Uromodulin OS=Homo sapiens OX=9606 GN=UMOD PE=1 SV=1	6940.69	0	0	0	0	2.86872e+06	0	0	0	0	0	0	0	0	0	0	0	0	0
K.AC[+57.02146]AGGYYVYN[+892.31722]LTAPPE.C	HexNAc(2)Hex(3)	266	>sp|P07911|UROM_HUMAN Uromodulin OS=Homo sapiens OX=9606 GN=UMOD PE=1 SV=1	2637.09	0	0	0	0	0	5.79817e+07	0	0	0	0	0	0	0	0	0	0	0	0
K.AC[+57.02146]AGGYYVYN[+1694.60274]LTAPPEC[+57.02146]HLAYC[+57.02146]TDPSSVEGTC[+57.02146]E.E	HexNAc(3)Hex(4)Fuc(1)NeuAc(1)	266	>sp|P07911|UROM_HUMAN Uromodulin OS=Homo sapiens OX=9606 GN=UMOD PE=1 SV=1	5406.13	0	0	0	0	0	0	0	4.74093e+06	0	0	0	0	0	0	0	0	0	0
R.WHC[+57.02146]QC[+57.02146]KQDFN[+2141.78803]ITDISLLE.H	HexNAc(6)Hex(3)Fuc(1)NeuAc(1)	313	>sp|P07911|UROM_HUMAN Uromodulin OS=Homo sapiens OX=9606 GN=UMOD PE=1 SV=1	4447.83	0	0	1.03012e+07	0	0	0	0	0	0	0	0	0	0	0	0	0	0	0
K.QDFN[+2919.04192]ITDISLLE.H	HexNAc(6)Hex(6)Fuc(1)NeuAc(2)	319	>sp|P07911|UROM_HUMAN Uromodulin OS=Homo sapiens OX=9606 GN=UMOD PE=1 SV=1	4325.73	0	0	0	0	0	0	0	1.13175e+06	0	0	0	0	0	0	0	0	0	0
K.QDFN[+3048.08451]ITDISLLE.H	HexNAc(6)Hex(5)Fuc(1)NeuAc(3)	319	>sp|P07911|UROM_HUMAN Uromodulin OS=Homo sapiens OX=9606 GN=UMOD PE=1 SV=1	4454.78	0	0	0	0	0	0	0	249503408	0	0	0	0	0	0	0	0	0	0
K.QDFN[+2715.96255]ITDISLLEHR.L	HexNAc(5)Hex(6)Fuc(1)NeuAc(2)	319	>sp|P07911|UROM_HUMAN Uromodulin OS=Homo sapiens OX=9606 GN=UMOD PE=1 SV=1	4415.82	0	0	0	0	0	1.34788e+08	0	0	0	0	0	0	0	0	0	0	0	0
K.QDFN[+2935.03683]ITDISLLEHR.L	HexNAc(6)Hex(7)NeuAc(2)	319	>sp|P07911|UROM_HUMAN Uromodulin OS=Homo sapiens OX=9606 GN=UMOD PE=1 SV=1	4634.89	0	0	0	0	0	0	2.09311e+07	0	0	0	0	0	0	0	0	0	0	0
K.QDFN[+3405.20039]ITDISLLEHR.L	HexNAc(6)Hex(9)Fuc(1)NeuAc(2)	319	>sp|P07911|UROM_HUMAN Uromodulin OS=Homo sapiens OX=9606 GN=UMOD PE=1 SV=1	5105.05	0	0	0	4.35139e+08	0	0	0	0	0	0	0	0	0	0	0	0	0	0
K.QDFN[+3663.28558]ITDISLLEHR.L	HexNAc(6)Hex(7)Fuc(1)NeuAc(4)	319	>sp|P07911|UROM_HUMAN Uromodulin OS=Homo sapiens OX=9606 GN=UMOD PE=1 SV=1	5363.14	0	0	0	0	0	1.04656e+08	0	0	0	0	0	0	0	0	0	0	0	0
K.QDFN[+3866.36495]ITDISLLEHR.L	HexNAc(7)Hex(7)Fuc(1)NeuAc(4)	319	>sp|P07911|UROM_HUMAN Uromodulin OS=Homo sapiens OX=9606 GN=UMOD PE=1 SV=1	5566.22	0	0	0	0	0	0	2.3888e+07	0	0	0	0	0	0	0	0	0	0	0
K.QDFN[+4393.54997]ITDISLLEHR.L	HexNAc(8)Hex(9)Fuc(1)NeuAc(4)	319	>sp|P07911|UROM_HUMAN Uromodulin OS=Homo sapiens OX=9606 GN=UMOD PE=1 SV=1	6093.4	0	0	0	0	0	0	0	9.42784e+06	0	0	0	0	0	0	0	0	0	0
K.QDFN[+3210.13734]ITDISLLEHR.L	HexNAc(6)Hex(6)Fuc(1)NeuAc(3)	319	>sp|P07911|UROM_HUMAN Uromodulin OS=Homo sapiens OX=9606 GN=UMOD PE=1 SV=1	4909.99	0	0	0	0	0	4.02191e+07	0	0	0	0	0	0	0	0	0	0	0	0
K.QDFN[+3575.26953]ITDISLLEHR.L	HexNAc(7)Hex(7)Fuc(1)NeuAc(3)	319	>sp|P07911|UROM_HUMAN Uromodulin OS=Homo sapiens OX=9606 GN=UMOD PE=1 SV=1	5275.12	0	0	0	0	0	21863218	0	0	0	0	0	0	0	0	0	0	0	0
R.DGPC[+57.02146]GTVLTRN[+1710.59765]E.T	HexNAc(3)Hex(5)NeuAc(1)	386	>sp|P07911|UROM_HUMAN Uromodulin OS=Homo sapiens OX=9606 GN=UMOD PE=1 SV=1	3028.2	0	0	0	0	0	0	0	0	0	0	0	0	0	0	0	2.21106e+06	0	0
R.DGPC[+57.02146]GTVLTRN[+3276.15780]E.T	HexNAc(6)Hex(10)Fuc(1)NeuAc(1)	386	>sp|P07911|UROM_HUMAN Uromodulin OS=Homo sapiens OX=9606 GN=UMOD PE=1 SV=1	4593.76	0	0	0	0	0	0	0	0	0	0	0	0	0	0	339793	0	0	0
R.DGPC[+57.02146]GTVLTRN[+4758.68216]ETHATYSNTLYLADE.I	HexNAc(9)Hex(10)Fuc(1)NeuAc(4)	386	>sp|P07911|UROM_HUMAN Uromodulin OS=Homo sapiens OX=9606 GN=UMOD PE=1 SV=1	7656	0	1.98613e+08	0	0	0	0	0	0	0	0	0	0	0	0	0	0	0	0
R.DGPC[+57.02146]GTVLTRN[+2221.78776]E.T	HexNAc(4)Hex(6)Fuc(1)NeuAc(1)	386	>sp|P07911|UROM_HUMAN Uromodulin OS=Homo sapiens OX=9606 GN=UMOD PE=1 SV=1	3539.39	0	0	0	0	0	0	0	0	0	0	0	0	0	0	3.86612e+06	0	0	0
R.DGPC[+57.02146]GTVLTRN[+3446.22694]E.T	HexNAc(7)Hex(8)Fuc(1)NeuAc(2)	386	>sp|P07911|UROM_HUMAN Uromodulin OS=Homo sapiens OX=9606 GN=UMOD PE=1 SV=1	4763.83	0	0	0	0	2.08907e+06	0	0	0	0	0	0	0	0	0	0	0	0	0
R.N[+1784.63443]ETHATYSNTLYLADE.I	HexNAc(4)Hex(6)	396	>sp|P07911|UROM_HUMAN Uromodulin OS=Homo sapiens OX=9606 GN=UMOD PE=1 SV=1	3625.45	0	0	0	0	1.90042e+07	0	0	0	0	0	0	0	0	0	0	0	0	0
R.N[+1954.70357]ETHATYSNTLYLADE.I	HexNAc(5)Hex(4)NeuAc(1)	396	>sp|P07911|UROM_HUMAN Uromodulin OS=Homo sapiens OX=9606 GN=UMOD PE=1 SV=1	3795.52	0	2.32784e+07	0	0	0	0	0	0	0	0	0	0	0	0	0	0	0	0
R.N[+2018.70838]ETHATYSNTLYLADE.I	HexNAc(3)Hex(6)Fuc(1)NeuAc(1)	396	>sp|P07911|UROM_HUMAN Uromodulin OS=Homo sapiens OX=9606 GN=UMOD PE=1 SV=1	3859.52	0	0	0	0	5.21307e+07	0	0	0	0	0	0	0	0	0	0	0	0	0
R.N[+2026.68698]ETHATYSNTLYLADE.I	HexNAc(2)Hex(10)	396	>sp|P07911|UROM_HUMAN Uromodulin OS=Homo sapiens OX=9606 GN=UMOD PE=1 SV=1	3867.5	0	0	0	0	0	0	1.61788e+06	0	0	0	0	0	0	0	0	0	0	0
R.N[+2311.81945]ETHATYSNTLYLADE.I	HexNAc(5)Hex(8)	396	>sp|P07911|UROM_HUMAN Uromodulin OS=Homo sapiens OX=9606 GN=UMOD PE=1 SV=1	4152.63	0	0	0	0	9.69506e+07	0	0	0	0	0	0	0	0	0	0	0	0	0
R.N[+2350.79263]ETHATYSNTLYLADE.I	HexNAc(2)Hex(12)	396	>sp|P07911|UROM_HUMAN Uromodulin OS=Homo sapiens OX=9606 GN=UMOD PE=1 SV=1	4191.6	1.42289e+09	0	0	0	0	0	0	0	0	0	0	0	0	0	0	0	0	0
R.N[+2756.98910]ETHATYSNTLYLADE.I	HexNAc(6)Hex(5)Fuc(1)NeuAc(2)	396	>sp|P07911|UROM_HUMAN Uromodulin OS=Homo sapiens OX=9606 GN=UMOD PE=1 SV=1	4597.8	0	0	0	0	0	0	6.4457e+07	0	0	0	0	0	0	0	0	0	0	0
R.N[+3210.13734]ETHATYSNTLYLADE.I	HexNAc(6)Hex(6)Fuc(1)NeuAc(3)	396	>sp|P07911|UROM_HUMAN Uromodulin OS=Homo sapiens OX=9606 GN=UMOD PE=1 SV=1	5050.95	0	0	2.84028e+07	0	0	0	0	0	0	0	0	0	0	0	0	0	0	0
R.N[+2059.73493]ETHATYSNTLYLADEIIIR.D	HexNAc(4)Hex(5)Fuc(1)NeuAc(1)	396	>sp|P07911|UROM_HUMAN Uromodulin OS=Homo sapiens OX=9606 GN=UMOD PE=1 SV=1	4395.9	2.76938e+07	0	0	0	0	0	0	0	0	0	0	0	0	0	0	0	0	0
R.N[+2278.80922]ETHATYSNTLYLADEIIIR.D	HexNAc(5)Hex(6)NeuAc(1)	396	>sp|P07911|UROM_HUMAN Uromodulin OS=Homo sapiens OX=9606 GN=UMOD PE=1 SV=1	4614.97	0	0	0	0	0	0	0	1.07066e+07	0	0	0	0	0	0	0	0	0	0
R.N[+2772.98401]ETHATYSNTLYLADEIIIR.D	HexNAc(6)Hex(6)NeuAc(2)	396	>sp|P07911|UROM_HUMAN Uromodulin OS=Homo sapiens OX=9606 GN=UMOD PE=1 SV=1	5109.15	0	0	0	0	0	0	1.4484e+07	0	0	0	0	0	0	0	0	0	0	0
R.N[+2133.77171]ETHATYSNTLYLADE.I	HexNAc(5)Hex(6)Fuc(1)	396	>sp|P07911|UROM_HUMAN Uromodulin OS=Homo sapiens OX=9606 GN=UMOD PE=1 SV=1	3974.58	0	0	0	0	9.17983e+07	0	0	0	0	0	0	0	0	0	0	0	0	0
R.FALLMTNC[+57.02146]YATPSSN[+1298.47596]ATDPLK.Y	HexNAc(4)Hex(3)	499	>sp|P07911|UROM_HUMAN Uromodulin OS=Homo sapiens OX=9606 GN=UMOD PE=1 SV=1	3612.57	0	1.28819e+07	0	0	0	0	0	0	0	0	0	0	0	0	0	0	0	0
R.FALLMTNC[+57.02146]YATPSSN[+1403.50732]ATDPLK.Y	HexNAc(3)Hex(4)Fuc(1)	499	>sp|P07911|UROM_HUMAN Uromodulin OS=Homo sapiens OX=9606 GN=UMOD PE=1 SV=1	3717.6	0	0	0	0	0	0	0	1.55278e+07	0	0	0	0	0	0	0	0	0	0
R.FALLMTNC[+57.02146]YATPSSN[+1622.58161]ATDPLK.Y	HexNAc(4)Hex(5)	499	>sp|P07911|UROM_HUMAN Uromodulin OS=Homo sapiens OX=9606 GN=UMOD PE=1 SV=1	3936.68	0	3.11089e+07	0	0	0	0	0	0	0	0	0	0	0	0	0	0	0	0
R.FALLMTNC[+57.02146]YATPSSN[+1872.65048]ATDPLK.Y	HexNAc(3)Hex(6)NeuAc(1)	499	>sp|P07911|UROM_HUMAN Uromodulin OS=Homo sapiens OX=9606 GN=UMOD PE=1 SV=1	4186.75	0	0	0	0	1.58252e+06	0	0	0	0	0	0	0	0	0	0	0	0	0
R.FALLMTNC[+57.02146]YATPSSN[+2188.73980]ATDPLK.Y	HexNAc(2)Hex(11)	499	>sp|P07911|UROM_HUMAN Uromodulin OS=Homo sapiens OX=9606 GN=UMOD PE=1 SV=1	4502.84	0	0	0	0	0	2.30648e+06	0	0	0	0	0	0	0	0	0	0	0	0
R.FALLMTNC[+57.02146]YATPSSN[+2237.78267]ATDPLK.Y	HexNAc(4)Hex(7)NeuAc(1)	499	>sp|P07911|UROM_HUMAN Uromodulin OS=Homo sapiens OX=9606 GN=UMOD PE=1 SV=1	4551.88	0	0	0	0	1.8985e+07	0	0	0	0	0	0	0	0	0	0	0	0	0
R.FALLMTNC[+57.02146]YATPSSN[+2311.81945]ATDPLK.Y	HexNAc(5)Hex(8)	499	>sp|P07911|UROM_HUMAN Uromodulin OS=Homo sapiens OX=9606 GN=UMOD PE=1 SV=1	4625.92	0	0	0	0	0	0	0	4.48685e+07	0	0	0	0	0	0	0	0	0	0
R.FALLMTNC[+57.02146]YATPSSN[+2352.84600]ATDPLK.Y	HexNAc(6)Hex(7)	499	>sp|P07911|UROM_HUMAN Uromodulin OS=Homo sapiens OX=9606 GN=UMOD PE=1 SV=1	4666.94	0	0	0	3.68128e+09	0	0	0	0	0	0	0	0	0	0	0	0	0	0
R.FALLMTNC[+57.02146]YATPSSN[+2759.00475]ATDPLK.Y	HexNAc(8)Hex(7)	499	>sp|P07911|UROM_HUMAN Uromodulin OS=Homo sapiens OX=9606 GN=UMOD PE=1 SV=1	5073.1	0	0	0	2.35856e+08	0	0	0	0	0	0	0	0	0	0	0	0	0	0
R.FALLMTNC[+57.02146]YATPSSN[+2921.05757]ATDPLK.Y	HexNAc(8)Hex(8)	499	>sp|P07911|UROM_HUMAN Uromodulin OS=Homo sapiens OX=9606 GN=UMOD PE=1 SV=1	5235.15	0	0	0	0	0	0	0	0	4.46564e+08	0	0	0	0	0	0	0	0	0
R.FALLMTNC[+57.02146]YATPSSN[+3067.11548]ATDPLK.Y	HexNAc(8)Hex(8)Fuc(1)	499	>sp|P07911|UROM_HUMAN Uromodulin OS=Homo sapiens OX=9606 GN=UMOD PE=1 SV=1	5381.21	0	4.2358e+07	0	0	0	0	0	0	0	0	0	0	0	0	0	0	0	0
R.FALLMTNC[+57.02146]YATPSSN[+3083.11039]ATDPLK.Y	HexNAc(8)Hex(9)	499	>sp|P07911|UROM_HUMAN Uromodulin OS=Homo sapiens OX=9606 GN=UMOD PE=1 SV=1	5397.21	0	0	0	0	0	4.51271e+07	0	0	0	0	0	0	0	0	0	0	0	0
R.FALLMTNC[+57.02146]YATPSSN[+3229.16830]ATDPLK.Y	HexNAc(8)Hex(9)Fuc(1)	499	>sp|P07911|UROM_HUMAN Uromodulin OS=Homo sapiens OX=9606 GN=UMOD PE=1 SV=1	5543.27	0	0	1.19234e+08	0	0	0	0	0	0	0	0	0	0	0	0	0	0	0
R.FALLMTNC[+57.02146]YATPSSN[+3276.15780]ATDPLK.Y	HexNAc(6)Hex(10)Fuc(1)NeuAc(1)	499	>sp|P07911|UROM_HUMAN Uromodulin OS=Homo sapiens OX=9606 GN=UMOD PE=1 SV=1	5590.26	0	0	5.63146e+06	0	0	0	0	0	0	0	0	0	0	0	0	0	0	0
R.FALLMTNC[+57.02146]YATPSSN[+3575.26953]ATDPLK.Y	HexNAc(7)Hex(7)Fuc(1)NeuAc(3)	499	>sp|P07911|UROM_HUMAN Uromodulin OS=Homo sapiens OX=9606 GN=UMOD PE=1 SV=1	5889.37	0	0	0	953517	0	0	0	0	0	0	0	0	0	0	0	0	0	0
R.FALLMTNC[+57.02146]YATPSSN[+3866.36495]ATDPLK.Y	HexNAc(7)Hex(7)Fuc(1)NeuAc(4)	499	>sp|P07911|UROM_HUMAN Uromodulin OS=Homo sapiens OX=9606 GN=UMOD PE=1 SV=1	6180.46	0	0	0	0	0	0	5.80314e+06	0	0	0	0	0	0	0	0	0	0	0
R.FALLMTNC[+57.02146]YATPSSN[+406.15875]ATDPLK.Y	HexNAc(2)	499	>sp|P07911|UROM_HUMAN Uromodulin OS=Homo sapiens OX=9606 GN=UMOD PE=1 SV=1	2720.26	2.69486e+07	0	0	0	0	0	0	0	0	0	0	0	0	0	0	0	0	0
R.FALLM[+15.99492]TNC[+57.02146]YATPSSN[+1257.44941]ATDPLK.Y	HexNAc(3)Hex(4)	499	>sp|P07911|UROM_HUMAN Uromodulin OS=Homo sapiens OX=9606 GN=UMOD PE=1 SV=1	3587.54	3.72584e+07	0	0	0	0	0	0	0	0	0	0	0	0	0	0	0	0	0
R.FALLM[+15.99492]TNC[+57.02146]YATPSSN[+1751.62420]ATDPLK.Y	HexNAc(4)Hex(4)NeuAc(1)	499	>sp|P07911|UROM_HUMAN Uromodulin OS=Homo sapiens OX=9606 GN=UMOD PE=1 SV=1	4081.72	0	0	0	0	0	0	0	0	0	0	0	8.5816e+07	0	0	0	0	0	0
R.FALLM[+15.99492]TNC[+57.02146]YATPSSN[+1825.66098]ATDPLK.Y	HexNAc(5)Hex(5)	499	>sp|P07911|UROM_HUMAN Uromodulin OS=Homo sapiens OX=9606 GN=UMOD PE=1 SV=1	4155.75	0	0	0	0	0	0	0	0	0	0	0	5.57552e+07	0	0	0	0	0	0
R.FALLM[+15.99492]TNC[+57.02146]YATPSSN[+1907.71408]ATDPLK.Y	HexNAc(7)Hex(3)	499	>sp|P07911|UROM_HUMAN Uromodulin OS=Homo sapiens OX=9606 GN=UMOD PE=1 SV=1	4237.81	5.11605e+07	0	0	0	0	0	0	0	0	0	0	0	0	0	0	0	0	0
R.FALLM[+15.99492]TNC[+57.02146]YATPSSN[+1913.67702]ATDPLK.Y	HexNAc(4)Hex(5)NeuAc(1)	499	>sp|P07911|UROM_HUMAN Uromodulin OS=Homo sapiens OX=9606 GN=UMOD PE=1 SV=1	4243.77	0	0	0	0	0	6.62318e+06	0	0	0	0	0	0	0	0	0	0	0	0
R.FALLM[+15.99492]TNC[+57.02146]YATPSSN[+1987.71380]ATDPLK.Y	HexNAc(5)Hex(6)	499	>sp|P07911|UROM_HUMAN Uromodulin OS=Homo sapiens OX=9606 GN=UMOD PE=1 SV=1	4317.81	0	2.81192e+07	0	0	0	0	0	0	0	0	0	0	0	0	0	0	0	0
R.FALLM[+15.99492]TNC[+57.02146]YATPSSN[+2018.70838]ATDPLK.Y	HexNAc(3)Hex(6)Fuc(1)NeuAc(1)	499	>sp|P07911|UROM_HUMAN Uromodulin OS=Homo sapiens OX=9606 GN=UMOD PE=1 SV=1	4348.8	9.49173e+07	0	0	0	0	0	0	0	0	0	0	0	0	0	0	0	0	0
R.FALLM[+15.99492]TNC[+57.02146]YATPSSN[+2028.74035]ATDPLK.Y	HexNAc(6)Hex(5)	499	>sp|P07911|UROM_HUMAN Uromodulin OS=Homo sapiens OX=9606 GN=UMOD PE=1 SV=1	4358.83	0	0	0	0	4.09471e+06	0	0	0	0	0	0	0	0	0	0	0	0	0
R.FALLM[+15.99492]TNC[+57.02146]YATPSSN[+2141.78803]ATDPLK.Y	HexNAc(6)Hex(3)Fuc(1)NeuAc(1)	499	>sp|P07911|UROM_HUMAN Uromodulin OS=Homo sapiens OX=9606 GN=UMOD PE=1 SV=1	4471.88	0	0	0	0	0	0	0	3.99985e+07	0	0	0	0	0	0	0	0	0	0
R.FALLM[+15.99492]TNC[+57.02146]YATPSSN[+2157.78295]ATDPLK.Y	HexNAc(6)Hex(4)NeuAc(1)	499	>sp|P07911|UROM_HUMAN Uromodulin OS=Homo sapiens OX=9606 GN=UMOD PE=1 SV=1	4487.88	0	12580792	0	0	0	0	0	0	0	0	0	0	0	0	0	0	0	0
R.FALLM[+15.99492]TNC[+57.02146]YATPSSN[+2190.79318]ATDPLK.Y	HexNAc(6)Hex(6)	499	>sp|P07911|UROM_HUMAN Uromodulin OS=Homo sapiens OX=9606 GN=UMOD PE=1 SV=1	4520.89	0	0	0	0	0	2.93681e+07	0	0	0	0	0	0	0	0	0	0	0	0
R.FALLM[+15.99492]TNC[+57.02146]YATPSSN[+2204.77244]ATDPLK.Y	HexNAc(4)Hex(5)NeuAc(2)	499	>sp|P07911|UROM_HUMAN Uromodulin OS=Homo sapiens OX=9606 GN=UMOD PE=1 SV=1	4534.86	0	0	0	0	76180464	0	0	0	0	0	0	0	0	0	0	0	0	0
R.FALLM[+15.99492]TNC[+57.02146]YATPSSN[+2237.78267]ATDPLK.Y	HexNAc(4)Hex(7)NeuAc(1)	499	>sp|P07911|UROM_HUMAN Uromodulin OS=Homo sapiens OX=9606 GN=UMOD PE=1 SV=1	4567.87	2370457	0	0	0	0	0	0	0	0	0	0	0	0	0	0	0	0	0
R.FALLM[+15.99492]TNC[+57.02146]YATPSSN[+2313.87282]ATDPLK.Y	HexNAc(9)Hex(3)	499	>sp|P07911|UROM_HUMAN Uromodulin OS=Homo sapiens OX=9606 GN=UMOD PE=1 SV=1	4643.97	0	0	0	0	0	0	0	7.11737e+07	0	0	0	0	0	0	0	0	0	0
R.FALLM[+15.99492]TNC[+57.02146]YATPSSN[+2407.85181]ATDPLK.Y	HexNAc(5)Hex(5)NeuAc(2)	499	>sp|P07911|UROM_HUMAN Uromodulin OS=Homo sapiens OX=9606 GN=UMOD PE=1 SV=1	4737.94	0	0	0	0	0	0	0	0	0	0	0	1.15973e+06	0	0	0	0	0	0
R.FALLM[+15.99492]TNC[+57.02146]YATPSSN[+2759.00475]ATDPLK.Y	HexNAc(8)Hex(7)	499	>sp|P07911|UROM_HUMAN Uromodulin OS=Homo sapiens OX=9606 GN=UMOD PE=1 SV=1	5089.1	0	4.38853e+07	0	0	0	0	0	0	0	0	0	0	0	0	0	0	0	0
R.FALLM[+15.99492]TNC[+57.02146]YATPSSN[+2789.99933]ATDPLK.Y	HexNAc(6)Hex(7)Fuc(1)NeuAc(1)	499	>sp|P07911|UROM_HUMAN Uromodulin OS=Homo sapiens OX=9606 GN=UMOD PE=1 SV=1	5120.09	0	0	0	0	0	0	0	0	0	0	0	7755203	0	0	0	0	0	0
R.FALLM[+15.99492]TNC[+57.02146]YATPSSN[+2878.01537]ATDPLK.Y	HexNAc(5)Hex(7)Fuc(1)NeuAc(2)	499	>sp|P07911|UROM_HUMAN Uromodulin OS=Homo sapiens OX=9606 GN=UMOD PE=1 SV=1	5208.11	0	0	0	0	0	1.40783e+06	0	0	0	0	0	0	0	0	0	0	0	0
R.FALLM[+15.99492]TNC[+57.02146]YATPSSN[+2952.05215]ATDPLK.Y	HexNAc(6)Hex(8)Fuc(1)NeuAc(1)	499	>sp|P07911|UROM_HUMAN Uromodulin OS=Homo sapiens OX=9606 GN=UMOD PE=1 SV=1	5282.14	0	0	0	0	0	0	0	1.43461e+06	0	0	0	0	0	0	0	0	0	0
R.FALLM[+15.99492]TNC[+57.02146]YATPSSN[+3083.11039]ATDPLK.Y	HexNAc(8)Hex(9)	499	>sp|P07911|UROM_HUMAN Uromodulin OS=Homo sapiens OX=9606 GN=UMOD PE=1 SV=1	5413.2	3.99604e+08	0	0	0	0	0	0	0	0	0	0	0	0	0	0	0	0	0
R.FALLM[+15.99492]TNC[+57.02146]YATPSSN[+3165.16349]ATDPLK.Y	HexNAc(10)Hex(7)	499	>sp|P07911|UROM_HUMAN Uromodulin OS=Homo sapiens OX=9606 GN=UMOD PE=1 SV=1	5495.26	7.79576e+07	0	0	0	0	0	0	0	0	0	0	0	0	0	0	0	0	0
R.FALLM[+15.99492]TNC[+57.02146]YATPSSN[+3229.16830]ATDPLK.Y	HexNAc(8)Hex(9)Fuc(1)	499	>sp|P07911|UROM_HUMAN Uromodulin OS=Homo sapiens OX=9606 GN=UMOD PE=1 SV=1	5559.26	0	0	0	0	0	2.19826e+08	0	0	0	0	0	0	0	0	0	0	0	0
R.FALLM[+15.99492]TNC[+57.02146]YATPSSN[+3446.22694]ATDPLK.Y	HexNAc(7)Hex(8)Fuc(1)NeuAc(2)	499	>sp|P07911|UROM_HUMAN Uromodulin OS=Homo sapiens OX=9606 GN=UMOD PE=1 SV=1	5776.32	0	0	0	0	0	0	0	0	0	0	0	4465185	0	0	0	0	0	0
R.FALLM[+15.99492]TNC[+57.02146]YATPSSN[+349.13728]ATDPLK.Y	HexNAc(1)Fuc(1)	499	>sp|P07911|UROM_HUMAN Uromodulin OS=Homo sapiens OX=9606 GN=UMOD PE=1 SV=1	2679.23	0	0	0	4.34282e+07	0	0	0	0	0	0	0	0	0	0	0	0	0	0
R.FALLMTNC[+57.02146]YATPSSN[+1460.52878]ATDPLK.Y	HexNAc(4)Hex(4)	499	>sp|P07911|UROM_HUMAN Uromodulin OS=Homo sapiens OX=9606 GN=UMOD PE=1 SV=1	3774.63	0	0	0	0	0	0	0	8.35265e+06	0	0	0	0	0	0	0	0	0	0
R.FALLMTNC[+57.02146]YATPSSN[+2336.85109]ATDPLK.Y	HexNAc(6)Hex(6)Fuc(1)	499	>sp|P07911|UROM_HUMAN Uromodulin OS=Homo sapiens OX=9606 GN=UMOD PE=1 SV=1	4650.95	14807594	0	0	0	0	0	0	0	0	0	0	0	0	0	0	0	0	0
R.FALLMTNC[+57.02146]YATPSSN[+3048.08451]ATDPLK.Y	HexNAc(6)Hex(5)Fuc(1)NeuAc(3)	499	>sp|P07911|UROM_HUMAN Uromodulin OS=Homo sapiens OX=9606 GN=UMOD PE=1 SV=1	5362.18	0	0	0	0	0	0	8.58303e+07	0	0	0	0	0	0	0	0	0	0	0
R.FALLM[+15.99492]TNC[+57.02146]YATPSSN[+1946.68725]ATDPLK.Y	HexNAc(4)Hex(7)	499	>sp|P07911|UROM_HUMAN Uromodulin OS=Homo sapiens OX=9606 GN=UMOD PE=1 SV=1	4276.78	0	0	0	0	0	0	3.12089e+06	0	0	0	0	0	0	0	0	0	0	0
R.FALLM[+15.99492]TNC[+57.02146]YATPSSN[+2459.93073]ATDPLK.Y	HexNAc(9)Hex(3)Fuc(1)	499	>sp|P07911|UROM_HUMAN Uromodulin OS=Homo sapiens OX=9606 GN=UMOD PE=1 SV=1	4790.02	0	0	0	0	0	0	0	0	0	0	0	3.91048e+07	0	0	0	0	0	0
R.FALLM[+15.99492]TNC[+57.02146]YATPSSN[+3284.17411]ATDPLK.Y	HexNAc(7)Hex(7)Fuc(1)NeuAc(2)	499	>sp|P07911|UROM_HUMAN Uromodulin OS=Homo sapiens OX=9606 GN=UMOD PE=1 SV=1	5614.27	0	0	0	0	3.14682e+07	0	0	0	0	0	0	0	0	0	0	0	0	0
R.WC[+57.02146]SEC[+57.02146]HSN[+3372.19016]ATC[+57.02146]TE.D	HexNAc(6)Hex(7)Fuc(1)NeuAc(3)	31	>sp|P07911|UROM_HUMAN Uromodulin OS=Homo sapiens OX=9606 GN=UMOD PE=1 SV=1	5012.76	1.13811e+07	0	0	0	556783	0	0	0	0	0	0	0	0	0	0	0	0	0
R.WC[+57.02146]SEC[+57.02146]HSN[+3866.36495]ATC[+57.02146]TEDE.A	HexNAc(7)Hex(7)Fuc(1)NeuAc(4)	31	>sp|P07911|UROM_HUMAN Uromodulin OS=Homo sapiens OX=9606 GN=UMOD PE=1 SV=1	5751	1.46515e+07	6.64151e+06	0	0	0	0	0	0	0	0	0	0	0	0	0	0	0	0
R.WC[+57.02146]SEC[+57.02146]HSN[+4307.54957]ATC[+57.02146]TEDE.A	HexNAc(11)Hex(11)NeuAc(1)	31	>sp|P07911|UROM_HUMAN Uromodulin OS=Homo sapiens OX=9606 GN=UMOD PE=1 SV=1	6192.18	3.6986e+07	0	0	0	2.62834e+07	0	0	0	0	0	0	0	0	0	0	0	0	0
E.C[+57.02146]HSN[+2391.85690]ATC[+57.02146]TE.D	HexNAc(5)Hex(4)Fuc(1)NeuAc(2)	35	>sp|P07911|UROM_HUMAN Uromodulin OS=Homo sapiens OX=9606 GN=UMOD PE=1 SV=1	3470.24	5.33188e+06	0	0	2.91359e+07	0	0	0	0	0	0	0	0	0	0	0	0	0	0
E.C[+57.02146]HSN[+3081.09474]ATC[+57.02146]TE.D	HexNAc(6)Hex(7)Fuc(1)NeuAc(2)	35	>sp|P07911|UROM_HUMAN Uromodulin OS=Homo sapiens OX=9606 GN=UMOD PE=1 SV=1	4159.48	0	8.58787e+07	0	2.21319e+08	0	0	0	0	0	0	0	0	0	0	0	0	0	0
E.C[+57.02146]HSN[+3226.13225]ATC[+57.02146]TE.D	HexNAc(6)Hex(7)NeuAc(3)	35	>sp|P07911|UROM_HUMAN Uromodulin OS=Homo sapiens OX=9606 GN=UMOD PE=1 SV=1	4304.51	0	411222	0	2.56356e+07	0	0	0	0	0	0	0	0	0	0	0	0	0	0
E.C[+57.02146]HSN[+2391.85690]ATC[+57.02146]TEDE.A	HexNAc(5)Hex(4)Fuc(1)NeuAc(2)	35	>sp|P07911|UROM_HUMAN Uromodulin OS=Homo sapiens OX=9606 GN=UMOD PE=1 SV=1	3714.31	0	2.87009e+07	0	0	0	0	0	3.60167e+06	0	0	0	0	0	0	0	0	0	0
E.C[+57.02146]HSN[+3081.09474]ATC[+57.02146]TEDE.A	HexNAc(6)Hex(7)Fuc(1)NeuAc(2)	35	>sp|P07911|UROM_HUMAN Uromodulin OS=Homo sapiens OX=9606 GN=UMOD PE=1 SV=1	4403.55	20862442	6.38653e+07	0	0	0	0	0	0	0	0	0	0	0	0	0	0	0	0
E.C[+57.02146]HSN[+4028.41777]ATC[+57.02146]TEDE.A	HexNAc(7)Hex(8)Fuc(1)NeuAc(4)	35	>sp|P07911|UROM_HUMAN Uromodulin OS=Homo sapiens OX=9606 GN=UMOD PE=1 SV=1	5350.87	0	8.31703e+06	0	1.45999e+07	0	0	0	0	0	0	0	0	0	0	0	0	0	0
E.C[+57.02146]HSN[+4102.45455]ATC[+57.02146]TEDE.A	HexNAc(8)Hex(9)Fuc(1)NeuAc(3)	35	>sp|P07911|UROM_HUMAN Uromodulin OS=Homo sapiens OX=9606 GN=UMOD PE=1 SV=1	5424.9	0	0	0	1.14375e+07	0	0	0	0	524298	0	0	0	0	0	0	0	0	0
E.C[+57.02146]HSN[+552.21665]ATC[+57.02146]TEDE.A	HexNAc(2)Fuc(1)	35	>sp|P07911|UROM_HUMAN Uromodulin OS=Homo sapiens OX=9606 GN=UMOD PE=1 SV=1	1874.67	0	0	0	2.30162e+06	0	0	1.77319e+06	0	0	0	0	0	0	0	0	0	0	0
E.C[+57.02146]HSN[+2715.96255]ATC[+57.02146]TEDEAVTTC[+57.02146]TC[+57.02146]QE.G	HexNAc(5)Hex(6)Fuc(1)NeuAc(2)	35	>sp|P07911|UROM_HUMAN Uromodulin OS=Homo sapiens OX=9606 GN=UMOD PE=1 SV=1	5088.82	0	15028466	0	3.36837e+06	0	0	0	0	0	0	0	0	0	0	0	0	0	0
E.C[+57.02146]HSN[+4307.54957]ATC[+57.02146]TEDEAVTTC[+57.02146]TC[+57.02146]QE.G	HexNAc(11)Hex(11)NeuAc(1)	35	>sp|P07911|UROM_HUMAN Uromodulin OS=Homo sapiens OX=9606 GN=UMOD PE=1 SV=1	6680.41	0	0	0	4.22809e+07	1.76529e+08	0	0	0	0	0	0	0	0	0	0	0	0	0
E.C[+57.02146]HSN[+3007.05796]ATC[+57.02146]TE.D	HexNAc(5)Hex(6)Fuc(1)NeuAc(3)	35	>sp|P07911|UROM_HUMAN Uromodulin OS=Homo sapiens OX=9606 GN=UMOD PE=1 SV=1	4085.44	0	36649656	0	0	0	0	0	0	123816	0	0	0	0	0	0	0	0	0
E.C[+57.02146]HSN[+3372.19016]ATC[+57.02146]TE.D	HexNAc(6)Hex(7)Fuc(1)NeuAc(3)	35	>sp|P07911|UROM_HUMAN Uromodulin OS=Homo sapiens OX=9606 GN=UMOD PE=1 SV=1	4450.57	0	8413201	0	1.09034e+08	0	0	0	0	0	0	0	0	0	0	0	0	0	0
E.C[+57.02146]HSN[+3007.05796]ATC[+57.02146]TEDE.A	HexNAc(5)Hex(6)Fuc(1)NeuAc(3)	35	>sp|P07911|UROM_HUMAN Uromodulin OS=Homo sapiens OX=9606 GN=UMOD PE=1 SV=1	4329.51	0	0	0	93360896	0	11951449	0	0	0	0	0	0	0	0	0	0	0	0
E.C[+57.02146]HSN[+3575.26953]ATC[+57.02146]TEDEAVTTC[+57.02146]TC[+57.02146]QE.G	HexNAc(7)Hex(7)Fuc(1)NeuAc(3)	35	>sp|P07911|UROM_HUMAN Uromodulin OS=Homo sapiens OX=9606 GN=UMOD PE=1 SV=1	5948.13	0	0	0	1.03369e+07	0	0	3.03272e+06	0	0	0	0	0	0	0	0	0	0	0
R.C[+57.02146]NTAAPMWLN[+1622.58161]GTHPSSDE.G	HexNAc(4)Hex(5)	223	>sp|P07911|UROM_HUMAN Uromodulin OS=Homo sapiens OX=9606 GN=UMOD PE=1 SV=1	3609.4	0	99892104	0	1.23966e+08	0	0	0	0	0	0	0	0	0	0	0	0	0	0
R.C[+57.02146]NTAAPMWLN[+2026.68698]GTHPSSDE.G	HexNAc(2)Hex(10)	223	>sp|P07911|UROM_HUMAN Uromodulin OS=Homo sapiens OX=9606 GN=UMOD PE=1 SV=1	4013.51	10814455	10164635	0	0	0	0	0	0	0	0	0	0	0	0	0	0	0	0
R.C[+57.02146]NTAAPMWLN[+2215.82481]GTHPSSDE.G	HexNAc(7)Hex(4)Fuc(1)	223	>sp|P07911|UROM_HUMAN Uromodulin OS=Homo sapiens OX=9606 GN=UMOD PE=1 SV=1	4202.64	1.36167e+08	1.66931e+08	0	0	0	0	0	0	0	0	0	0	0	0	0	0	0	0
R.C[+57.02146]NTAAPMWLN[+3229.16830]GTHPSSDE.G	HexNAc(8)Hex(9)Fuc(1)	223	>sp|P07911|UROM_HUMAN Uromodulin OS=Homo sapiens OX=9606 GN=UMOD PE=1 SV=1	5215.99	0	0	0	0	4.38189e+07	0	0	0	4.55311e+07	0	0	0	0	0	0	0	0	0
R.C[+57.02146]NTAAPMWLN[+349.13728]GTHPSSDE.G	HexNAc(1)Fuc(1)	223	>sp|P07911|UROM_HUMAN Uromodulin OS=Homo sapiens OX=9606 GN=UMOD PE=1 SV=1	2335.96	0	0	0	6.36529e+07	1.95199e+07	0	0	0	0	0	0	0	0	0	0	0	0	0
R.C[+57.02146]NTAAPM[+15.99492]WLN[+2092.74516]GTHPSSDE.G	HexNAc(4)Hex(7)Fuc(1)	223	>sp|P07911|UROM_HUMAN Uromodulin OS=Homo sapiens OX=9606 GN=UMOD PE=1 SV=1	4095.56	0	2.20239e+06	0	0	0	1.12349e+06	0	0	0	0	0	0	0	0	0	0	0	0
R.C[+57.02146]NTAAPM[+15.99492]WLN[+2393.87255]GTHPSSDE.G	HexNAc(7)Hex(6)	223	>sp|P07911|UROM_HUMAN Uromodulin OS=Homo sapiens OX=9606 GN=UMOD PE=1 SV=1	4396.69	1.04988e+09	0	0	0	0	0	8.9769e+08	0	0	0	0	0	0	0	0	0	0	0
R.C[+57.02146]NTAAPM[+15.99492]WLN[+3007.05796]GTHPSSDE.G	HexNAc(5)Hex(6)Fuc(1)NeuAc(3)	223	>sp|P07911|UROM_HUMAN Uromodulin OS=Homo sapiens OX=9606 GN=UMOD PE=1 SV=1	5009.87	0	0	0	0	0	4684238	0	0	6638114	0	0	0	0	0	0	0	0	0
R.C[+57.02146]NTAAPM[+15.99492]WLN[+3704.31212]GTHPSSDE.G	HexNAc(7)Hex(6)Fuc(1)NeuAc(4)	223	>sp|P07911|UROM_HUMAN Uromodulin OS=Homo sapiens OX=9606 GN=UMOD PE=1 SV=1	5707.13	0	0	0	3.62062e+07	0	0	2.92836e+06	0	0	0	0	0	0	0	0	0	0	0
R.C[+57.02146]NTAAPMWLN[+1419.50224]GTHPSSDEGIVSR.K	HexNAc(3)Hex(5)	223	>sp|P07911|UROM_HUMAN Uromodulin OS=Homo sapiens OX=9606 GN=UMOD PE=1 SV=1	3918.63	0	11408226	0	0	21153466	0	0	0	0	0	0	0	0	0	0	0	0	0
R.C[+57.02146]NTAAPMWLN[+1751.62420]GTHPSSDEGIVSR.K	HexNAc(4)Hex(4)NeuAc(1)	223	>sp|P07911|UROM_HUMAN Uromodulin OS=Homo sapiens OX=9606 GN=UMOD PE=1 SV=1	4250.75	0	7.98161e+06	0	4.3182e+06	0	0	0	0	0	0	0	0	0	0	0	0	0	0
R.C[+57.02146]NTAAPMWLN[+2053.77199]GTHPSSDEGIVSR.K	HexNAc(7)Hex(3)Fuc(1)	223	>sp|P07911|UROM_HUMAN Uromodulin OS=Homo sapiens OX=9606 GN=UMOD PE=1 SV=1	4552.9	64635280	4.03449e+08	0	0	0	0	0	0	0	0	0	0	0	0	0	0	0	0
R.C[+57.02146]NTAAPMWLN[+2110.79345]GTHPSSDEGIVSR.K	HexNAc(8)Hex(3)	223	>sp|P07911|UROM_HUMAN Uromodulin OS=Homo sapiens OX=9606 GN=UMOD PE=1 SV=1	4609.92	0	1.18382e+08	0	8.61264e+07	0	0	0	0	0	0	0	0	0	0	0	0	0	0
R.C[+57.02146]NTAAPMWLN[+2256.85136]GTHPSSDEGIVSR.K	HexNAc(8)Hex(3)Fuc(1)	223	>sp|P07911|UROM_HUMAN Uromodulin OS=Homo sapiens OX=9606 GN=UMOD PE=1 SV=1	4755.98	0	2.18526e+07	0	1.34292e+07	0	0	0	0	0	0	0	0	0	0	0	0	0	0
R.C[+57.02146]NTAAPMWLN[+2432.88345]GTHPSSDEGIVSR.K	HexNAc(6)Hex(3)Fuc(1)NeuAc(2)	223	>sp|P07911|UROM_HUMAN Uromodulin OS=Homo sapiens OX=9606 GN=UMOD PE=1 SV=1	4932.01	1.20485e+07	0	0	0	7.90315e+06	0	0	0	0	0	0	0	0	0	0	0	0	0
R.C[+57.02146]NTAAPMWLN[+2580.95701]GTHPSSDEGIVSR.K	HexNAc(8)Hex(5)Fuc(1)	223	>sp|P07911|UROM_HUMAN Uromodulin OS=Homo sapiens OX=9606 GN=UMOD PE=1 SV=1	5080.08	0	1.3345e+07	0	8.00517e+06	0	0	0	0	0	0	0	0	0	0	0	0	0	0
R.C[+57.02146]NTAAPMWLN[+2621.98356]GTHPSSDEGIVSR.K	HexNAc(9)Hex(4)Fuc(1)	223	>sp|P07911|UROM_HUMAN Uromodulin OS=Homo sapiens OX=9606 GN=UMOD PE=1 SV=1	5121.11	3.18114e+07	7.97176e+07	0	0	0	0	0	0	0	0	0	0	0	0	0	0	0	0
R.C[+57.02146]NTAAPMWLN[+3048.08451]GTHPSSDEGIVSR.K	HexNAc(6)Hex(5)Fuc(1)NeuAc(3)	223	>sp|P07911|UROM_HUMAN Uromodulin OS=Homo sapiens OX=9606 GN=UMOD PE=1 SV=1	5547.21	9.7079e+07	0	0	2.08115e+07	0	0	0	0	0	0	0	0	0	0	0	0	0	0
R.C[+57.02146]NTAAPMWLN[+3229.16830]GTHPSSDEGIVSR.K	HexNAc(8)Hex(9)Fuc(1)	223	>sp|P07911|UROM_HUMAN Uromodulin OS=Homo sapiens OX=9606 GN=UMOD PE=1 SV=1	5728.3	0	0	0	0	1.00877e+09	0	3.08233e+08	0	0	0	0	0	0	0	0	0	0	0
R.C[+57.02146]NTAAPMWLN[+3866.36495]GTHPSSDEGIVSR.K	HexNAc(7)Hex(7)Fuc(1)NeuAc(4)	223	>sp|P07911|UROM_HUMAN Uromodulin OS=Homo sapiens OX=9606 GN=UMOD PE=1 SV=1	6365.49	0	0	0	1.03418e+07	2.13993e+07	0	0	0	0	0	0	0	0	0	0	0	0	0
R.C[+57.02146]NTAAPM[+15.99492]WLN[+2028.74035]GTHPSSDEGIVSR.K	HexNAc(6)Hex(5)	223	>sp|P07911|UROM_HUMAN Uromodulin OS=Homo sapiens OX=9606 GN=UMOD PE=1 SV=1	4543.86	0	0	0	0	47112456	0	0	2.04402e+08	0	0	0	0	0	0	0	0	0	0
R.C[+57.02146]NTAAPM[+15.99492]WLN[+2149.76663]GTHPSSDEGIVSR.K	HexNAc(5)Hex(7)	223	>sp|P07911|UROM_HUMAN Uromodulin OS=Homo sapiens OX=9606 GN=UMOD PE=1 SV=1	4664.89	0	0	0	5298311	0	0	1.10927e+06	0	0	0	0	0	0	0	0	0	0	0
R.C[+57.02146]NTAAPM[+15.99492]WLN[+2393.87255]GTHPSSDEGIVSR.K	HexNAc(7)Hex(6)	223	>sp|P07911|UROM_HUMAN Uromodulin OS=Homo sapiens OX=9606 GN=UMOD PE=1 SV=1	4908.99	5.84721e+06	0	0	0	0	0	0	1.69441e+07	0	0	0	0	0	0	0	0	0	0
R.C[+57.02146]NTAAPMWLN[+1930.69234]GTHPSSDE.G	HexNAc(4)Hex(6)Fuc(1)	223	>sp|P07911|UROM_HUMAN Uromodulin OS=Homo sapiens OX=9606 GN=UMOD PE=1 SV=1	3917.51	0	0	0	1.98394e+08	0	0	0	563412608	0	0	0	0	0	0	0	0	0	0
R.C[+57.02146]NTAAPMWLN[+1971.71889]GTHPSSDE.G	HexNAc(5)Hex(5)Fuc(1)	223	>sp|P07911|UROM_HUMAN Uromodulin OS=Homo sapiens OX=9606 GN=UMOD PE=1 SV=1	3958.54	3.95928e+08	6.19357e+08	0	0	0	0	0	0	0	0	0	0	0	0	0	0	0	0
R.C[+57.02146]NTAAPMWLN[+2018.70838]GTHPSSDE.G	HexNAc(3)Hex(6)Fuc(1)NeuAc(1)	223	>sp|P07911|UROM_HUMAN Uromodulin OS=Homo sapiens OX=9606 GN=UMOD PE=1 SV=1	4005.53	0	0	0	0	0	0	0	2.30488e+07	5.92666e+07	0	0	0	0	0	0	0	0	0
R.C[+57.02146]NTAAPMWLN[+2149.76663]GTHPSSDE.G	HexNAc(5)Hex(7)	223	>sp|P07911|UROM_HUMAN Uromodulin OS=Homo sapiens OX=9606 GN=UMOD PE=1 SV=1	4136.59	0	4.49654e+07	0	3.26933e+07	0	0	0	0	0	0	0	0	0	0	0	0	0	0
R.C[+57.02146]NTAAPMWLN[+2295.82454]GTHPSSDE.G	HexNAc(5)Hex(7)Fuc(1)	223	>sp|P07911|UROM_HUMAN Uromodulin OS=Homo sapiens OX=9606 GN=UMOD PE=1 SV=1	4282.64	0	0	0	4.06119e+08	0	0	0	2.32826e+08	0	0	0	0	0	0	0	0	0	0
R.C[+57.02146]NTAAPMWLN[+2676.95165]GTHPSSDE.G	HexNAc(6)Hex(9)	223	>sp|P07911|UROM_HUMAN Uromodulin OS=Homo sapiens OX=9606 GN=UMOD PE=1 SV=1	4663.77	3.36418e+07	0	0	9.53841e+07	0	0	0	0	0	0	0	0	0	0	0	0	0	0
R.C[+57.02146]NTAAPMWLN[+2805.99424]GTHPSSDE.G	HexNAc(6)Hex(8)NeuAc(1)	223	>sp|P07911|UROM_HUMAN Uromodulin OS=Homo sapiens OX=9606 GN=UMOD PE=1 SV=1	4792.81	3.10843e+08	0	0	0	0	0	0	2.01729e+08	0	0	0	0	0	0	0	0	0	0
R.C[+57.02146]NTAAPM[+15.99492]WLN[+2157.78295]GTHPSSDE.G	HexNAc(6)Hex(4)NeuAc(1)	223	>sp|P07911|UROM_HUMAN Uromodulin OS=Homo sapiens OX=9606 GN=UMOD PE=1 SV=1	4160.6	0	18036052	0	2.52853e+06	0	0	0	0	0	0	0	0	0	0	0	0	0	0
R.C[+57.02146]NTAAPM[+15.99492]WLN[+2278.80922]GTHPSSDE.G	HexNAc(5)Hex(6)NeuAc(1)	223	>sp|P07911|UROM_HUMAN Uromodulin OS=Homo sapiens OX=9606 GN=UMOD PE=1 SV=1	4281.62	0	2.75239e+07	0	0	0	0	0	0	2.33818e+08	0	0	0	0	0	0	0	0	0
R.C[+57.02146]NTAAPM[+15.99492]WLN[+2352.84600]GTHPSSDE.G	HexNAc(6)Hex(7)	223	>sp|P07911|UROM_HUMAN Uromodulin OS=Homo sapiens OX=9606 GN=UMOD PE=1 SV=1	4355.66	0	0	0	8.37708e+07	2.97528e+07	0	0	0	0	0	0	0	0	0	0	0	0	0
R.C[+57.02146]NTAAPM[+15.99492]WLN[+2586.91995]GTHPSSDE.G	HexNAc(5)Hex(7)Fuc(1)NeuAc(1)	223	>sp|P07911|UROM_HUMAN Uromodulin OS=Homo sapiens OX=9606 GN=UMOD PE=1 SV=1	4589.73	0	0	0	0	0	3.38804e+07	0	0	1.77728e+08	0	0	0	0	0	0	0	0	0
R.C[+57.02146]NTAAPM[+15.99492]WLN[+3081.09474]GTHPSSDE.G	HexNAc(6)Hex(7)Fuc(1)NeuAc(2)	223	>sp|P07911|UROM_HUMAN Uromodulin OS=Homo sapiens OX=9606 GN=UMOD PE=1 SV=1	5083.91	0	4.89475e+07	0	0	6.6646e+06	0	0	0	0	0	0	0	0	0	0	0	0	0
R.C[+57.02146]NTAAPMWLN[+2075.72985]GTHPSSDEGIVSR.K	HexNAc(4)Hex(6)NeuAc(1)	223	>sp|P07911|UROM_HUMAN Uromodulin OS=Homo sapiens OX=9606 GN=UMOD PE=1 SV=1	4574.86	1.28562e+07	0	0	0	0	0	2.87552e+06	0	0	0	0	0	0	0	0	0	0	0
R.C[+57.02146]NTAAPMWLN[+2311.81945]GTHPSSDEGIVSR.K	HexNAc(5)Hex(8)	223	>sp|P07911|UROM_HUMAN Uromodulin OS=Homo sapiens OX=9606 GN=UMOD PE=1 SV=1	4810.95	0	7611123	0	0	2268266	0	0	0	0	0	0	0	0	0	0	0	0	0
R.C[+57.02146]NTAAPMWLN[+3405.20039]GTHPSSDEGIVSR.K	HexNAc(6)Hex(9)Fuc(1)NeuAc(2)	223	>sp|P07911|UROM_HUMAN Uromodulin OS=Homo sapiens OX=9606 GN=UMOD PE=1 SV=1	5904.33	0	0	0	0	0	1.73996e+06	8891192	0	0	0	0	0	0	0	0	0	0	0
R.C[+57.02146]NTAAPMWLN[+3446.22694]GTHPSSDEGIVSR.K	HexNAc(7)Hex(8)Fuc(1)NeuAc(2)	223	>sp|P07911|UROM_HUMAN Uromodulin OS=Homo sapiens OX=9606 GN=UMOD PE=1 SV=1	5945.35	0	0	0	0	6.38544e+06	4.29073e+06	0	0	0	0	0	0	0	0	0	0	0	0
R.C[+57.02146]NTAAPMWLN[+3704.31212]GTHPSSDEGIVSR.K	HexNAc(7)Hex(6)Fuc(1)NeuAc(4)	223	>sp|P07911|UROM_HUMAN Uromodulin OS=Homo sapiens OX=9606 GN=UMOD PE=1 SV=1	6203.44	0	0	75707008	0	0	0	137327024	0	0	0	0	0	0	0	0	0	0	0
R.C[+57.02146]NTAAPM[+15.99492]WLN[+2424.86713]GTHPSSDEGIVSR.K	HexNAc(5)Hex(6)Fuc(1)NeuAc(1)	223	>sp|P07911|UROM_HUMAN Uromodulin OS=Homo sapiens OX=9606 GN=UMOD PE=1 SV=1	4939.99	0	6.76392e+06	0	59583136	0	0	0	0	0	0	0	0	0	0	0	0	0	0
R.C[+57.02146]NTAAPM[+15.99492]WLN[+2586.91995]GTHPSSDEGIVSR.K	HexNAc(5)Hex(7)Fuc(1)NeuAc(1)	223	>sp|P07911|UROM_HUMAN Uromodulin OS=Homo sapiens OX=9606 GN=UMOD PE=1 SV=1	5102.04	0	0	0	0	0	6346653	0	0	0	0	0	44735188	0	0	0	0	0	0
R.C[+57.02146]NTAAPM[+15.99492]WLN[+2919.04192]GTHPSSDEGIVSR.K	HexNAc(6)Hex(6)Fuc(1)NeuAc(2)	223	>sp|P07911|UROM_HUMAN Uromodulin OS=Homo sapiens OX=9606 GN=UMOD PE=1 SV=1	5434.16	0	4.52265e+08	0	0	0	0	0	0	0	0	0	1.28666e+07	0	0	0	0	0	0
R.C[+57.02146]NTAAPM[+15.99492]WLN[+2952.05215]GTHPSSDEGIVSR.K	HexNAc(6)Hex(8)Fuc(1)NeuAc(1)	223	>sp|P07911|UROM_HUMAN Uromodulin OS=Homo sapiens OX=9606 GN=UMOD PE=1 SV=1	5467.17	0	0	0	23724288	0	0	0	0	0	0	0	28824906	0	0	0	0	0	0
K.AC[+57.02146]AGGYYVYN[+3048.08451]LTAPPE.C	HexNAc(6)Hex(5)Fuc(1)NeuAc(3)	266	>sp|P07911|UROM_HUMAN Uromodulin OS=Homo sapiens OX=9606 GN=UMOD PE=1 SV=1	4792.86	0	0	0	0	0	0	2.23693e+08	0	2.27789e+09	0	0	0	0	0	0	0	0	0
K.AC[+57.02146]AGGYYVYN[+1809.66607]LTAPPEC[+57.02146]HLAYC[+57.02146]TDPSSVE.G	HexNAc(5)Hex(4)Fuc(1)	266	>sp|P07911|UROM_HUMAN Uromodulin OS=Homo sapiens OX=9606 GN=UMOD PE=1 SV=1	5074.05	0	2.45021e+08	0	0	0	0	0	1.97747e+08	0	0	0	0	0	0	0	0	0	0
K.AC[+57.02146]AGGYYVYN[+2756.98910]LTAPPEC[+57.02146]HLAYC[+57.02146]TDPSSVE.G	HexNAc(6)Hex(5)Fuc(1)NeuAc(2)	266	>sp|P07911|UROM_HUMAN Uromodulin OS=Homo sapiens OX=9606 GN=UMOD PE=1 SV=1	6021.37	0	0	0	1.15123e+08	0	3.38369e+07	0	0	0	0	0	0	0	0	0	0	0	0
K.AC[+57.02146]AGGYYVYN[+2864.03611]LTAPPEC[+57.02146]HLAYC[+57.02146]TDPSSVE.G	HexNAc(7)Hex(8)Fuc(1)	266	>sp|P07911|UROM_HUMAN Uromodulin OS=Homo sapiens OX=9606 GN=UMOD PE=1 SV=1	6128.42	0	0	0	0	0	0	5.66116e+07	0	1.94351e+07	0	0	0	0	0	0	0	0	0
K.AC[+57.02146]AGGYYVYN[+2921.05757]LTAPPEC[+57.02146]HLAYC[+57.02146]TDPSSVE.G	HexNAc(8)Hex(8)	266	>sp|P07911|UROM_HUMAN Uromodulin OS=Homo sapiens OX=9606 GN=UMOD PE=1 SV=1	6185.44	0	0	3.41865e+08	0	0	0	0	1.9209e+08	0	0	0	0	0	0	0	0	0	0
K.AC[+57.02146]AGGYYVYN[+3007.05796]LTAPPEC[+57.02146]HLAYC[+57.02146]TDPSSVE.G	HexNAc(5)Hex(6)Fuc(1)NeuAc(3)	266	>sp|P07911|UROM_HUMAN Uromodulin OS=Homo sapiens OX=9606 GN=UMOD PE=1 SV=1	6271.44	0	0	0	0	0	0	5.02998e+07	1.61128e+07	0	0	0	0	0	0	0	0	0	0
K.AC[+57.02146]AGGYYVYN[+3155.13152]LTAPPEC[+57.02146]HLAYC[+57.02146]TDPSSVE.G	HexNAc(7)Hex(8)Fuc(1)NeuAc(1)	266	>sp|P07911|UROM_HUMAN Uromodulin OS=Homo sapiens OX=9606 GN=UMOD PE=1 SV=1	6419.52	0	0	1.77881e+06	0	0	0	2.69984e+06	0	0	0	0	0	0	0	0	0	0	0
K.AC[+57.02146]AGGYYVYN[+2424.86713]LTAPPEC[+57.02146]HLAYC[+57.02146]TDPSSVEGTC[+57.02146]E.E	HexNAc(5)Hex(6)Fuc(1)NeuAc(1)	266	>sp|P07911|UROM_HUMAN Uromodulin OS=Homo sapiens OX=9606 GN=UMOD PE=1 SV=1	6136.39	94097944	0	0	271489248	0	0	0	0	0	0	0	0	0	0	0	0	0	0
K.AC[+57.02146]AGGYYVYN[+2457.87736]LTAPPEC[+57.02146]HLAYC[+57.02146]TDPSSVEGTC[+57.02146]E.E	HexNAc(5)Hex(8)Fuc(1)	266	>sp|P07911|UROM_HUMAN Uromodulin OS=Homo sapiens OX=9606 GN=UMOD PE=1 SV=1	6169.4	0	0	0	0	2.71793e+08	0	1.23837e+08	0	0	0	0	0	0	0	0	0	0	0
K.AC[+57.02146]AGGYYVYN[+2643.94142]LTAPPEC[+57.02146]HLAYC[+57.02146]TDPSSVEGTC[+57.02146]E.E	HexNAc(6)Hex(7)NeuAc(1)	266	>sp|P07911|UROM_HUMAN Uromodulin OS=Homo sapiens OX=9606 GN=UMOD PE=1 SV=1	6355.47	0	0	0	3.53085e+07	0	0	3.72569e+07	0	0	0	0	0	0	0	0	0	0	0
K.AC[+57.02146]AGGYYVYN[+2701.98328]LTAPPEC[+57.02146]HLAYC[+57.02146]TDPSSVEGTC[+57.02146]E.E	HexNAc(7)Hex(7)Fuc(1)	266	>sp|P07911|UROM_HUMAN Uromodulin OS=Homo sapiens OX=9606 GN=UMOD PE=1 SV=1	6413.51	0	0	0	0	0	0	4.69516e+06	0	1.45914e+07	0	0	0	0	0	0	0	0	0
K.AC[+57.02146]AGGYYVYN[+3147.11520]LTAPPEC[+57.02146]HLAYC[+57.02146]TDPSSVEGTC[+57.02146]E.E	HexNAc(6)Hex(11)Fuc(1)	266	>sp|P07911|UROM_HUMAN Uromodulin OS=Homo sapiens OX=9606 GN=UMOD PE=1 SV=1	6858.64	0	0	0	0	1.2871e+08	0	1.89587e+08	0	0	0	0	0	0	0	0	0	0	0
K.AC[+57.02146]AGGYYVYN[+2116.75640]LTAPPEC[+57.02146]HLAYC[+57.02146]TDPSSVE.G	HexNAc(5)Hex(5)NeuAc(1)	266	>sp|P07911|UROM_HUMAN Uromodulin OS=Homo sapiens OX=9606 GN=UMOD PE=1 SV=1	5381.14	0	890803392	0	0	0	0	0	0	223302944	0	0	0	0	0	0	0	0	0
K.QDFN[+2715.96255]ITDISLLE.H	HexNAc(5)Hex(6)Fuc(1)NeuAc(2)	319	>sp|P07911|UROM_HUMAN Uromodulin OS=Homo sapiens OX=9606 GN=UMOD PE=1 SV=1	4122.66	0	0	0	199761	0	0	0	0	6041790	0	0	0	0	0	0	0	0	0
K.QDFN[+3448.24259]ITDISLLE.H	HexNAc(9)Hex(10)	319	>sp|P07911|UROM_HUMAN Uromodulin OS=Homo sapiens OX=9606 GN=UMOD PE=1 SV=1	4854.94	0	1.92151e+08	0	0	0	7.6326e+06	0	0	0	0	0	0	0	0	0	0	0	0
K.QDFN[+3866.36495]ITDISLLE.H	HexNAc(7)Hex(7)Fuc(1)NeuAc(4)	319	>sp|P07911|UROM_HUMAN Uromodulin OS=Homo sapiens OX=9606 GN=UMOD PE=1 SV=1	5273.06	0	0	1.11864e+07	3.40056e+06	0	0	0	0	0	0	0	0	0	0	0	0	0	0
K.QDFN[+4102.45455]ITDISLLE.H	HexNAc(8)Hex(9)Fuc(1)NeuAc(3)	319	>sp|P07911|UROM_HUMAN Uromodulin OS=Homo sapiens OX=9606 GN=UMOD PE=1 SV=1	5509.15	0	0	0	0	4.60925e+06	0	10201776	0	0	0	0	0	0	0	0	0	0	0
K.QDFN[+4307.54957]ITDISLLE.H	HexNAc(11)Hex(11)NeuAc(1)	319	>sp|P07911|UROM_HUMAN Uromodulin OS=Homo sapiens OX=9606 GN=UMOD PE=1 SV=1	5714.24	0	0	0	0	76808992	0	0	0	0	8.09207e+07	0	0	0	0	0	0	0	0
K.QDFN[+3517.22767]ITDISLLEHR.L	HexNAc(6)Hex(7)NeuAc(4)	319	>sp|P07911|UROM_HUMAN Uromodulin OS=Homo sapiens OX=9606 GN=UMOD PE=1 SV=1	5217.08	0	0	0	2.37545e+06	0	0	0	0	1.36004e+06	0	0	0	0	0	0	0	0	0
K.QDFN[+3446.22694]ITDISLLE.H	HexNAc(7)Hex(8)Fuc(1)NeuAc(2)	319	>sp|P07911|UROM_HUMAN Uromodulin OS=Homo sapiens OX=9606 GN=UMOD PE=1 SV=1	4852.92	0	0	4.19055e+07	0	0	0	0	0	0	0	0	317248	0	0	0	0	0	0
K.QDFN[+3007.05796]ITDISLLEHR.L	HexNAc(5)Hex(6)Fuc(1)NeuAc(3)	319	>sp|P07911|UROM_HUMAN Uromodulin OS=Homo sapiens OX=9606 GN=UMOD PE=1 SV=1	4706.91	0	0	0	0	0	1.29406e+08	0	0	0	0	0	1.69324e+08	0	0	0	0	0	0
K.QDFN[+3081.09474]ITDISLLEHR.L	HexNAc(6)Hex(7)Fuc(1)NeuAc(2)	319	>sp|P07911|UROM_HUMAN Uromodulin OS=Homo sapiens OX=9606 GN=UMOD PE=1 SV=1	4780.95	0	0	0	0	0	1.05451e+08	0	0	0	0	0	1.2927e+08	0	0	0	0	0	0
R.DGPC[+57.02146]GTVLTRN[+2481.88859]E.T	HexNAc(6)Hex(6)NeuAc(1)	386	>sp|P07911|UROM_HUMAN Uromodulin OS=Homo sapiens OX=9606 GN=UMOD PE=1 SV=1	3799.49	0	0	0	0	0	0	0	0	0	0	0	0	0	0	1.19389e+07	7.50393e+06	0	0
R.DGPC[+57.02146]GTVLTRN[+2805.99424]E.T	HexNAc(6)Hex(8)NeuAc(1)	386	>sp|P07911|UROM_HUMAN Uromodulin OS=Homo sapiens OX=9606 GN=UMOD PE=1 SV=1	4123.59	3.16157e+06	0	0	0	0	0	0	0	0	0	0	1.05274e+07	0	0	0	0	0	0
R.DGPC[+57.02146]GTVLTRN[+1897.68211]E.T	HexNAc(4)Hex(4)Fuc(1)NeuAc(1)	386	>sp|P07911|UROM_HUMAN Uromodulin OS=Homo sapiens OX=9606 GN=UMOD PE=1 SV=1	3215.28	0	0	0	4.70722e+06	0	1.38668e+07	0	0	0	0	0	0	0	0	0	0	0	0
R.DGPC[+57.02146]GTVLTRN[+2116.75640]E.T	HexNAc(5)Hex(5)NeuAc(1)	386	>sp|P07911|UROM_HUMAN Uromodulin OS=Homo sapiens OX=9606 GN=UMOD PE=1 SV=1	3434.35	0	0	0	0	0	0	0	0	0	0	0	0	0	0	3.05679e+07	2.02711e+07	0	0
R.DGPC[+57.02146]GTVLTRN[+3155.13152]E.T	HexNAc(7)Hex(8)Fuc(1)NeuAc(1)	386	>sp|P07911|UROM_HUMAN Uromodulin OS=Homo sapiens OX=9606 GN=UMOD PE=1 SV=1	4472.73	0	0	0	0	0	0	0	0	0	0	0	0	0	0	13010670	9497477	0	0
R.DGPC[+57.02146]GTVLTRN[+2715.96255]ETHATYSNTLYLADE.I	HexNAc(5)Hex(6)Fuc(1)NeuAc(2)	386	>sp|P07911|UROM_HUMAN Uromodulin OS=Homo sapiens OX=9606 GN=UMOD PE=1 SV=1	5613.28	0	0	0	0	7302609	0	16246875	0	0	0	0	0	0	0	0	0	0	0
R.N[+2805.99424]ETHATYSNTLYLADE.I	HexNAc(6)Hex(8)NeuAc(1)	396	>sp|P07911|UROM_HUMAN Uromodulin OS=Homo sapiens OX=9606 GN=UMOD PE=1 SV=1	4646.81	0	3.51962e+06	0	0	0	0	1.62168e+07	0	0	0	0	0	0	0	0	0	0	0
R.N[+2569.90464]ETHATYSNTLYLADEIIIR.D	HexNAc(5)Hex(6)NeuAc(2)	396	>sp|P07911|UROM_HUMAN Uromodulin OS=Homo sapiens OX=9606 GN=UMOD PE=1 SV=1	4906.07	0	0	0	0	0	0	3.75512e+07	4.94226e+07	0	0	0	0	0	0	0	0	0	0
R.FALLMTNC[+57.02146]YATPSSN[+1444.53387]ATDPLK.Y	HexNAc(4)Hex(3)Fuc(1)	499	>sp|P07911|UROM_HUMAN Uromodulin OS=Homo sapiens OX=9606 GN=UMOD PE=1 SV=1	3758.63	0	2.51835e+07	0	0	0	0	0	1.56339e+07	0	0	0	0	0	0	0	0	0	0
R.FALLMTNC[+57.02146]YATPSSN[+1540.52851]ATDPLK.Y	HexNAc(2)Hex(7)	499	>sp|P07911|UROM_HUMAN Uromodulin OS=Homo sapiens OX=9606 GN=UMOD PE=1 SV=1	3854.63	6.8068e+06	0	0	0	0	0	1.75581e+07	0	0	0	0	0	0	0	0	0	0	0
R.FALLMTNC[+57.02146]YATPSSN[+1784.63443]ATDPLK.Y	HexNAc(4)Hex(6)	499	>sp|P07911|UROM_HUMAN Uromodulin OS=Homo sapiens OX=9606 GN=UMOD PE=1 SV=1	4098.73	0	0	0	0	0	0	0	1.24072e+06	0	0	0	11424865	0	0	0	0	0	0
R.FALLMTNC[+57.02146]YATPSSN[+1866.68753]ATDPLK.Y	HexNAc(6)Hex(4)	499	>sp|P07911|UROM_HUMAN Uromodulin OS=Homo sapiens OX=9606 GN=UMOD PE=1 SV=1	4180.78	0	0	0	1.92346e+07	0	0	1.36864e+08	0	0	0	0	0	0	0	0	0	0	0
R.FALLMTNC[+57.02146]YATPSSN[+2256.85136]ATDPLK.Y	HexNAc(8)Hex(3)Fuc(1)	499	>sp|P07911|UROM_HUMAN Uromodulin OS=Homo sapiens OX=9606 GN=UMOD PE=1 SV=1	4570.95	0	3.66012e+07	0	4.90068e+07	0	0	0	0	0	0	0	0	0	0	0	0	0	0
R.FALLMTNC[+57.02146]YATPSSN[+2596.95192]ATDPLK.Y	HexNAc(8)Hex(6)	499	>sp|P07911|UROM_HUMAN Uromodulin OS=Homo sapiens OX=9606 GN=UMOD PE=1 SV=1	4911.05	0	54125272	0	5.67505e+07	0	0	0	0	0	0	0	0	0	0	0	0	0	0
R.FALLMTNC[+57.02146]YATPSSN[+3226.13225]ATDPLK.Y	HexNAc(6)Hex(7)NeuAc(3)	499	>sp|P07911|UROM_HUMAN Uromodulin OS=Homo sapiens OX=9606 GN=UMOD PE=1 SV=1	5540.23	0	0	0	0	0	0	0	3.64817e+07	1.56632e+06	0	0	0	0	0	0	0	0	0
R.FALLMTNC[+57.02146]YATPSSN[+3704.31212]ATDPLK.Y	HexNAc(7)Hex(6)Fuc(1)NeuAc(4)	499	>sp|P07911|UROM_HUMAN Uromodulin OS=Homo sapiens OX=9606 GN=UMOD PE=1 SV=1	6018.41	0	0	0	0	1.33622e+09	0	8.28332e+08	0	0	0	0	0	0	0	0	0	0	0
R.FALLM[+15.99492]TNC[+57.02146]YATPSSN[+1784.63443]ATDPLK.Y	HexNAc(4)Hex(6)	499	>sp|P07911|UROM_HUMAN Uromodulin OS=Homo sapiens OX=9606 GN=UMOD PE=1 SV=1	4114.73	0	0	0	0	0	0	2.51363e+06	0	3.62168e+06	0	0	0	0	0	0	0	0	0
R.FALLM[+15.99492]TNC[+57.02146]YATPSSN[+2116.75640]ATDPLK.Y	HexNAc(5)Hex(5)NeuAc(1)	499	>sp|P07911|UROM_HUMAN Uromodulin OS=Homo sapiens OX=9606 GN=UMOD PE=1 SV=1	4446.85	9.25938e+07	0	1.75676e+06	0	0	0	0	0	0	0	0	0	0	0	0	0	0	0
R.FALLM[+15.99492]TNC[+57.02146]YATPSSN[+2278.80922]ATDPLK.Y	HexNAc(5)Hex(6)NeuAc(1)	499	>sp|P07911|UROM_HUMAN Uromodulin OS=Homo sapiens OX=9606 GN=UMOD PE=1 SV=1	4608.9	0	0	0	0	0	2.24509e+06	3.79385e+06	0	0	0	0	0	0	0	0	0	0	0
R.FALLM[+15.99492]TNC[+57.02146]YATPSSN[+2393.87255]ATDPLK.Y	HexNAc(7)Hex(6)	499	>sp|P07911|UROM_HUMAN Uromodulin OS=Homo sapiens OX=9606 GN=UMOD PE=1 SV=1	4723.96	3.1867e+08	0	1.36858e+08	0	0	0	0	0	0	0	0	0	0	0	0	0	0	0
R.FALLM[+15.99492]TNC[+57.02146]YATPSSN[+2772.98401]ATDPLK.Y	HexNAc(6)Hex(6)NeuAc(2)	499	>sp|P07911|UROM_HUMAN Uromodulin OS=Homo sapiens OX=9606 GN=UMOD PE=1 SV=1	5103.08	0	0	0	0	1.78043e+06	1.69802e+06	0	0	0	0	0	0	0	0	0	0	0	0
R.FALLM[+15.99492]TNC[+57.02146]YATPSSN[+2864.03611]ATDPLK.Y	HexNAc(7)Hex(8)Fuc(1)	499	>sp|P07911|UROM_HUMAN Uromodulin OS=Homo sapiens OX=9606 GN=UMOD PE=1 SV=1	5194.13	0	0	0	0	0	3.83469e+07	9.06953e+07	0	0	0	0	0	0	0	0	0	0	0
R.FALLM[+15.99492]TNC[+57.02146]YATPSSN[+2921.05757]ATDPLK.Y	HexNAc(8)Hex(8)	499	>sp|P07911|UROM_HUMAN Uromodulin OS=Homo sapiens OX=9606 GN=UMOD PE=1 SV=1	5251.15	0	222944240	0	2.62935e+08	0	0	0	0	0	0	0	0	0	0	0	0	0	0
R.FALLM[+15.99492]TNC[+57.02146]YATPSSN[+3704.31212]ATDPLK.Y	HexNAc(7)Hex(6)Fuc(1)NeuAc(4)	499	>sp|P07911|UROM_HUMAN Uromodulin OS=Homo sapiens OX=9606 GN=UMOD PE=1 SV=1	6034.4	0	0	0	0	2.2032e+08	0	4.03342e+07	0	0	0	0	0	0	0	0	0	0	0
R.FALLMTNC[+57.02146]YATPSSN[+1704.63471]ATDPLK.Y	HexNAc(6)Hex(3)	499	>sp|P07911|UROM_HUMAN Uromodulin OS=Homo sapiens OX=9606 GN=UMOD PE=1 SV=1	4018.73	0	4.02925e+07	0	0	0	0	0	1.15579e+07	0	0	0	0	0	0	0	0	0	0
R.FALLMTNC[+57.02146]YATPSSN[+2012.74544]ATDPLK.Y	HexNAc(6)Hex(4)Fuc(1)	499	>sp|P07911|UROM_HUMAN Uromodulin OS=Homo sapiens OX=9606 GN=UMOD PE=1 SV=1	4326.84	0	8.16628e+06	0	0	0	0	2.07441e+06	0	0	0	0	0	0	0	0	0	0	0
R.FALLMTNC[+57.02146]YATPSSN[+2295.82454]ATDPLK.Y	HexNAc(5)Hex(7)Fuc(1)	499	>sp|P07911|UROM_HUMAN Uromodulin OS=Homo sapiens OX=9606 GN=UMOD PE=1 SV=1	4609.92	0	0	0	0	0	0	5.27979e+06	2.20375e+06	0	0	0	0	0	0	0	0	0	0
R.FALLMTNC[+57.02146]YATPSSN[+3405.20039]ATDPLK.Y	HexNAc(6)Hex(9)Fuc(1)NeuAc(2)	499	>sp|P07911|UROM_HUMAN Uromodulin OS=Homo sapiens OX=9606 GN=UMOD PE=1 SV=1	5719.3	0	0	0	0	0	1.23207e+07	7.42938e+06	0	0	0	0	0	0	0	0	0	0	0
R.FALLM[+15.99492]TNC[+57.02146]YATPSSN[+2245.79899]ATDPLK.Y	HexNAc(5)Hex(4)NeuAc(2)	499	>sp|P07911|UROM_HUMAN Uromodulin OS=Homo sapiens OX=9606 GN=UMOD PE=1 SV=1	4575.89	0	0	0	0	0	0	1.08707e+06	0	0	0	0	1.31005e+06	0	0	0	0	0	0
R.FALLM[+15.99492]TNC[+57.02146]YATPSSN[+2569.90464]ATDPLK.Y	HexNAc(5)Hex(6)NeuAc(2)	499	>sp|P07911|UROM_HUMAN Uromodulin OS=Homo sapiens OX=9606 GN=UMOD PE=1 SV=1	4900	0	0	0	0	0	7.27371e+06	0	0	0	0	0	7.04553e+06	0	0	0	0	0	0
R.WC[+57.02146]SEC[+57.02146]HSN[+3372.19016]ATC[+57.02146]TEDE.A	HexNAc(6)Hex(7)Fuc(1)NeuAc(3)	31	>sp|P07911|UROM_HUMAN Uromodulin OS=Homo sapiens OX=9606 GN=UMOD PE=1 SV=1	5256.83	6.89287e+07	1.71927e+07	0	0	3.89846e+06	0	0	0	0	0	0	0	0	0	0	0	0	0
E.C[+57.02146]HSN[+2715.96255]ATC[+57.02146]TEDE.A	HexNAc(5)Hex(6)Fuc(1)NeuAc(2)	35	>sp|P07911|UROM_HUMAN Uromodulin OS=Homo sapiens OX=9606 GN=UMOD PE=1 SV=1	4038.41	5.01029e+06	0	0	6.4054e+07	0	0	0	5.09301e+06	0	0	0	0	0	0	0	0	0	0
E.C[+57.02146]HSN[+2391.85690]ATC[+57.02146]TEDEAVTTC[+57.02146]TC[+57.02146]QE.G	HexNAc(5)Hex(4)Fuc(1)NeuAc(2)	35	>sp|P07911|UROM_HUMAN Uromodulin OS=Homo sapiens OX=9606 GN=UMOD PE=1 SV=1	4764.72	1.27589e+07	0	0	0	0	1.03229e+06	0	0	2.99295e+06	0	0	0	0	0	0	0	0	0
E.C[+57.02146]HSN[+349.13728]ATC[+57.02146]TEDEAVTTC[+57.02146]TC[+57.02146]QE.G	HexNAc(1)Fuc(1)	35	>sp|P07911|UROM_HUMAN Uromodulin OS=Homo sapiens OX=9606 GN=UMOD PE=1 SV=1	2722	1.376e+07	2.3679e+06	0	7.31921e+06	0	0	0	0	0	0	0	0	0	0	0	0	0	0
E.C[+57.02146]HSN[+3446.22694]ATC[+57.02146]TEDEAVTTC[+57.02146]TC[+57.02146]QE.G	HexNAc(7)Hex(8)Fuc(1)NeuAc(2)	35	>sp|P07911|UROM_HUMAN Uromodulin OS=Homo sapiens OX=9606 GN=UMOD PE=1 SV=1	5819.09	4.1488e+06	0	0	8.51304e+06	0	1.31955e+06	0	0	0	0	0	0	0	0	0	0	0	0
E.C[+57.02146]HSN[+3737.32236]ATC[+57.02146]TEDEAVTTC[+57.02146]TC[+57.02146]QE.G	HexNAc(7)Hex(8)Fuc(1)NeuAc(3)	35	>sp|P07911|UROM_HUMAN Uromodulin OS=Homo sapiens OX=9606 GN=UMOD PE=1 SV=1	6110.18	0	0	0	0	23560086	0	0	0	12371701	0	0	19188390	0	0	0	0	0	0
E.C[+57.02146]HSN[+4028.41777]ATC[+57.02146]TEDEAVTTC[+57.02146]TC[+57.02146]QE.G	HexNAc(7)Hex(8)Fuc(1)NeuAc(4)	35	>sp|P07911|UROM_HUMAN Uromodulin OS=Homo sapiens OX=9606 GN=UMOD PE=1 SV=1	6401.28	1.0247e+07	0	0	0	1.0761e+07	0	0	0	1.12041e+07	0	0	0	0	0	0	0	0	0
R.C[+57.02146]NTAAPMWLN[+1751.62420]GTHPSSDE.G	HexNAc(4)Hex(4)NeuAc(1)	223	>sp|P07911|UROM_HUMAN Uromodulin OS=Homo sapiens OX=9606 GN=UMOD PE=1 SV=1	3738.44	0	3.31924e+07	0	0	0	0	3.82087e+06	0	5.0313e+06	0	0	0	0	0	0	0	0	0
R.C[+57.02146]NTAAPMWLN[+1866.68753]GTHPSSDE.G	HexNAc(6)Hex(4)	223	>sp|P07911|UROM_HUMAN Uromodulin OS=Homo sapiens OX=9606 GN=UMOD PE=1 SV=1	3853.51	3.50492e+07	2.49764e+07	0	9.3147e+06	0	0	0	0	0	0	0	0	0	0	0	0	0	0
R.C[+57.02146]NTAAPMWLN[+203.07937]GTHPSSDE.G	HexNAc(1)	223	>sp|P07911|UROM_HUMAN Uromodulin OS=Homo sapiens OX=9606 GN=UMOD PE=1 SV=1	2189.9	3.74112e+07	4.89982e+07	0	2.17003e+08	0	0	0	0	0	0	0	0	0	0	0	0	0	0
R.C[+57.02146]NTAAPMWLN[+2336.85109]GTHPSSDE.G	HexNAc(6)Hex(6)Fuc(1)	223	>sp|P07911|UROM_HUMAN Uromodulin OS=Homo sapiens OX=9606 GN=UMOD PE=1 SV=1	4323.67	310252800	298011072	0	0	4.586e+07	0	0	0	0	0	0	0	0	0	0	0	0	0
R.C[+57.02146]NTAAPMWLN[+2715.96255]GTHPSSDE.G	HexNAc(5)Hex(6)Fuc(1)NeuAc(2)	223	>sp|P07911|UROM_HUMAN Uromodulin OS=Homo sapiens OX=9606 GN=UMOD PE=1 SV=1	4702.78	220971104	144429088	0	0	0	0	243694768	0	0	0	0	0	0	0	0	0	0	0
R.C[+57.02146]NTAAPMWLN[+2756.98910]GTHPSSDE.G	HexNAc(6)Hex(5)Fuc(1)NeuAc(2)	223	>sp|P07911|UROM_HUMAN Uromodulin OS=Homo sapiens OX=9606 GN=UMOD PE=1 SV=1	4743.81	0	4.82673e+06	0	5.81777e+06	1.21867e+07	0	0	0	0	0	0	0	0	0	0	0	0	0
R.C[+57.02146]NTAAPMWLN[+3009.07361]GTHPSSDE.G	HexNAc(7)Hex(8)NeuAc(1)	223	>sp|P07911|UROM_HUMAN Uromodulin OS=Homo sapiens OX=9606 GN=UMOD PE=1 SV=1	4995.89	183214448	17558518	0	7407664	0	0	0	0	0	0	0	0	0	0	0	0	0	0
R.C[+57.02146]NTAAPMWLN[+3048.08451]GTHPSSDE.G	HexNAc(6)Hex(5)Fuc(1)NeuAc(3)	223	>sp|P07911|UROM_HUMAN Uromodulin OS=Homo sapiens OX=9606 GN=UMOD PE=1 SV=1	5034.9	0	0	0	0	562401	0	3.14972e+06	0	2.93584e+06	0	0	0	0	0	0	0	0	0
R.C[+57.02146]NTAAPMWLN[+3155.13152]GTHPSSDE.G	HexNAc(7)Hex(8)Fuc(1)NeuAc(1)	223	>sp|P07911|UROM_HUMAN Uromodulin OS=Homo sapiens OX=9606 GN=UMOD PE=1 SV=1	5141.95	0	0	0	42148664	1.29177e+07	0	1.83797e+07	0	0	0	0	0	0	0	0	0	0	0
R.C[+57.02146]NTAAPMWLN[+3663.28558]GTHPSSDE.G	HexNAc(6)Hex(7)Fuc(1)NeuAc(4)	223	>sp|P07911|UROM_HUMAN Uromodulin OS=Homo sapiens OX=9606 GN=UMOD PE=1 SV=1	5650.11	0	4.78481e+06	0	4.18846e+06	4.14119e+07	0	0	0	0	0	0	0	0	0	0	0	0	0
R.C[+57.02146]NTAAPMWLN[+3737.32236]GTHPSSDE.G	HexNAc(7)Hex(8)Fuc(1)NeuAc(3)	223	>sp|P07911|UROM_HUMAN Uromodulin OS=Homo sapiens OX=9606 GN=UMOD PE=1 SV=1	5724.14	4.08614e+07	0	0	1.21264e+07	0	0	9.67968e+06	0	0	0	0	0	0	0	0	0	0	0
R.C[+57.02146]NTAAPM[+15.99492]WLN[+3229.16830]GTHPSSDE.G	HexNAc(8)Hex(9)Fuc(1)	223	>sp|P07911|UROM_HUMAN Uromodulin OS=Homo sapiens OX=9606 GN=UMOD PE=1 SV=1	5231.98	0	0	0	1.10316e+09	0	0	3.28723e+08	0	8.04713e+07	0	0	0	0	0	0	0	0	0
R.C[+57.02146]NTAAPM[+15.99492]WLN[+3575.26953]GTHPSSDE.G	HexNAc(7)Hex(7)Fuc(1)NeuAc(3)	223	>sp|P07911|UROM_HUMAN Uromodulin OS=Homo sapiens OX=9606 GN=UMOD PE=1 SV=1	5578.08	0	0	0	1.84769e+08	1.22467e+07	0	0	0	0	0	0	4.43585e+07	0	0	0	0	0	0
R.C[+57.02146]NTAAPM[+15.99492]WLN[+1403.50732]GTHPSSDEGIVSR.K	HexNAc(3)Hex(4)Fuc(1)	223	>sp|P07911|UROM_HUMAN Uromodulin OS=Homo sapiens OX=9606 GN=UMOD PE=1 SV=1	3918.63	0	0	6.23687e+07	0	0	9.4752e+06	5.39961e+06	0	0	0	0	0	0	0	0	0	0	0
R.C[+57.02146]NTAAPM[+15.99492]WLN[+2069.76690]GTHPSSDEGIVSR.K	HexNAc(7)Hex(4)	223	>sp|P07911|UROM_HUMAN Uromodulin OS=Homo sapiens OX=9606 GN=UMOD PE=1 SV=1	4584.89	0	1.63976e+07	0	0	3.62728e+07	0	0	6.84746e+07	0	0	0	0	0	0	0	0	0	0
R.C[+57.02146]NTAAPM[+15.99492]WLN[+3229.16830]GTHPSSDEGIVSR.K	HexNAc(8)Hex(9)Fuc(1)	223	>sp|P07911|UROM_HUMAN Uromodulin OS=Homo sapiens OX=9606 GN=UMOD PE=1 SV=1	5744.29	0	74258520	0	80127056	0	0	0	240056096	0	0	0	0	0	0	0	0	0	0
R.C[+57.02146]NTAAPMWLN[+2075.72985]GTHPSSDE.G	HexNAc(4)Hex(6)NeuAc(1)	223	>sp|P07911|UROM_HUMAN Uromodulin OS=Homo sapiens OX=9606 GN=UMOD PE=1 SV=1	4062.55	0	0	2421259	0	848265	0	0	0	46561824	0	0	0	0	0	0	0	0	0
R.C[+57.02146]NTAAPMWLN[+2110.79345]GTHPSSDE.G	HexNAc(8)Hex(3)	223	>sp|P07911|UROM_HUMAN Uromodulin OS=Homo sapiens OX=9606 GN=UMOD PE=1 SV=1	4097.61	3.24941e+07	2.48489e+08	0	1.92066e+08	0	0	0	0	0	0	0	0	0	0	0	0	0	0
R.C[+57.02146]NTAAPMWLN[+2465.89368]GTHPSSDE.G	HexNAc(6)Hex(5)Fuc(1)NeuAc(1)	223	>sp|P07911|UROM_HUMAN Uromodulin OS=Homo sapiens OX=9606 GN=UMOD PE=1 SV=1	4452.71	3.669e+08	5.28838e+07	0	5.51954e+07	0	0	0	0	0	0	0	0	0	0	0	0	0	0
R.C[+57.02146]NTAAPM[+15.99492]WLN[+2262.81431]GTHPSSDE.G	HexNAc(5)Hex(5)Fuc(1)NeuAc(1)	223	>sp|P07911|UROM_HUMAN Uromodulin OS=Homo sapiens OX=9606 GN=UMOD PE=1 SV=1	4265.63	231638960	0	0	503099328	0	10159159	0	0	0	0	0	0	0	0	0	0	0	0
R.C[+57.02146]NTAAPM[+15.99492]WLN[+3226.13225]GTHPSSDE.G	HexNAc(6)Hex(7)NeuAc(3)	223	>sp|P07911|UROM_HUMAN Uromodulin OS=Homo sapiens OX=9606 GN=UMOD PE=1 SV=1	5228.95	0	0	0	2.57866e+06	0	0	0	2.30076e+06	1.99336e+07	0	0	0	0	0	0	0	0	0
R.C[+57.02146]NTAAPMWLN[+1663.60816]GTHPSSDEGIVSR.K	HexNAc(5)Hex(4)	223	>sp|P07911|UROM_HUMAN Uromodulin OS=Homo sapiens OX=9606 GN=UMOD PE=1 SV=1	4162.74	0	1.26376e+08	0	7.16428e+07	5.6123e+06	0	0	0	0	0	0	0	0	0	0	0	0	0
R.C[+57.02146]NTAAPMWLN[+1987.71380]GTHPSSDEGIVSR.K	HexNAc(5)Hex(6)	223	>sp|P07911|UROM_HUMAN Uromodulin OS=Homo sapiens OX=9606 GN=UMOD PE=1 SV=1	4486.84	0	13244108	0	41289584	0	0	0	0	0	0	0	12785596	0	0	0	0	0	0
R.C[+57.02146]NTAAPMWLN[+2190.79318]GTHPSSDEGIVSR.K	HexNAc(6)Hex(6)	223	>sp|P07911|UROM_HUMAN Uromodulin OS=Homo sapiens OX=9606 GN=UMOD PE=1 SV=1	4689.92	0	6.7612e+06	0	0	41515100	0	0	1.08911e+08	0	0	0	0	0	0	0	0	0	0
R.C[+57.02146]NTAAPMWLN[+2805.99424]GTHPSSDEGIVSR.K	HexNAc(6)Hex(8)NeuAc(1)	223	>sp|P07911|UROM_HUMAN Uromodulin OS=Homo sapiens OX=9606 GN=UMOD PE=1 SV=1	5305.12	0	0	0	1.82013e+06	0	0	0	832164	3.28106e+06	0	0	0	0	0	0	0	0	0
R.C[+57.02146]NTAAPMWLN[+3155.13152]GTHPSSDEGIVSR.K	HexNAc(7)Hex(8)Fuc(1)NeuAc(1)	223	>sp|P07911|UROM_HUMAN Uromodulin OS=Homo sapiens OX=9606 GN=UMOD PE=1 SV=1	5654.26	0	0	0	0	4.17608e+07	0	2.54608e+07	8.26219e+07	0	0	0	0	0	0	0	0	0	0
R.C[+57.02146]NTAAPM[+15.99492]WLN[+2075.72985]GTHPSSDEGIVSR.K	HexNAc(4)Hex(6)NeuAc(1)	223	>sp|P07911|UROM_HUMAN Uromodulin OS=Homo sapiens OX=9606 GN=UMOD PE=1 SV=1	4590.85	9631870	0	0	9179732	0	0	0	18465840	0	0	0	0	0	0	0	0	0	0
R.C[+57.02146]NTAAPM[+15.99492]WLN[+3009.07361]GTHPSSDEGIVSR.K	HexNAc(7)Hex(8)NeuAc(1)	223	>sp|P07911|UROM_HUMAN Uromodulin OS=Homo sapiens OX=9606 GN=UMOD PE=1 SV=1	5524.2	0	0	0	6.84335e+07	1.06491e+08	0	0	3.78075e+07	0	0	0	0	0	0	0	0	0	0
K.AC[+57.02146]AGGYYVYN[+1710.59765]LTAPPE.C	HexNAc(3)Hex(5)NeuAc(1)	266	>sp|P07911|UROM_HUMAN Uromodulin OS=Homo sapiens OX=9606 GN=UMOD PE=1 SV=1	3455.37	1.2109e+07	0	0	0	0	6.76902e+06	0	1.49607e+07	0	0	0	0	0	0	0	0	0	0
K.AC[+57.02146]AGGYYVYN[+2278.80922]LTAPPE.C	HexNAc(5)Hex(6)NeuAc(1)	266	>sp|P07911|UROM_HUMAN Uromodulin OS=Homo sapiens OX=9606 GN=UMOD PE=1 SV=1	4023.59	1.74594e+08	0	0	9.59112e+08	0	0	0	1.21891e+08	0	0	0	0	0	0	0	0	0	0
K.AC[+57.02146]AGGYYVYN[+1751.62420]LTAPPE.C	HexNAc(4)Hex(4)NeuAc(1)	266	>sp|P07911|UROM_HUMAN Uromodulin OS=Homo sapiens OX=9606 GN=UMOD PE=1 SV=1	3496.4	5.43346e+07	0	2.435e+07	0	3.58531e+07	0	0	0	0	0	0	0	0	0	0	0	0	0
K.AC[+57.02146]AGGYYVYN[+2952.05215]LTAPPE.C	HexNAc(6)Hex(8)Fuc(1)NeuAc(1)	266	>sp|P07911|UROM_HUMAN Uromodulin OS=Homo sapiens OX=9606 GN=UMOD PE=1 SV=1	4696.83	0	1576497536	0	0	0	0	1338042240	421760160	0	0	0	0	0	0	0	0	0	0
K.AC[+57.02146]AGGYYVYN[+1954.70357]LTAPPEC[+57.02146]HLAYC[+57.02146]TDPSSVE.G	HexNAc(5)Hex(4)NeuAc(1)	266	>sp|P07911|UROM_HUMAN Uromodulin OS=Homo sapiens OX=9606 GN=UMOD PE=1 SV=1	5219.09	290860768	1.76179e+09	0	1.4168e+08	0	0	0	0	0	0	0	0	0	0	0	0	0	0
K.QDFN[+3081.09474]ITDISLLE.H	HexNAc(6)Hex(7)Fuc(1)NeuAc(2)	319	>sp|P07911|UROM_HUMAN Uromodulin OS=Homo sapiens OX=9606 GN=UMOD PE=1 SV=1	4487.79	0	0	0	0	0	0	0	6057800	4889464	7754531	0	0	0	0	0	0	0	0
R.DGPC[+57.02146]GTVLTRN[+1784.63443]E.T	HexNAc(4)Hex(6)	386	>sp|P07911|UROM_HUMAN Uromodulin OS=Homo sapiens OX=9606 GN=UMOD PE=1 SV=1	3102.23	2.25809e+07	0	0	7.93192e+06	4.97062e+06	0	0	0	0	0	0	0	0	0	0	0	0	0
R.DGPC[+57.02146]GTVLTRN[+1622.58161]E.T	HexNAc(4)Hex(5)	386	>sp|P07911|UROM_HUMAN Uromodulin OS=Homo sapiens OX=9606 GN=UMOD PE=1 SV=1	2940.18	0	0	0	6.3271e+06	0	0	0	0	0	0	0	0	0	0	2.62725e+07	13792388	0	0
R.DGPC[+57.02146]GTVLTRN[+2100.76148]E.T	HexNAc(5)Hex(4)Fuc(1)NeuAc(1)	386	>sp|P07911|UROM_HUMAN Uromodulin OS=Homo sapiens OX=9606 GN=UMOD PE=1 SV=1	3418.36	1.87046e+07	8.7995e+06	0	9.75113e+06	0	0	0	0	0	0	0	0	0	0	0	0	0	0
R.DGPC[+57.02146]GTVLTRN[+2295.82454]E.T	HexNAc(5)Hex(7)Fuc(1)	386	>sp|P07911|UROM_HUMAN Uromodulin OS=Homo sapiens OX=9606 GN=UMOD PE=1 SV=1	3613.42	0	0	0	0	0	0	0	0	0	0	0	2.32917e+07	0	0	1.96936e+07	2.59618e+07	0	0
R.DGPC[+57.02146]GTVLTRN[+2643.94142]E.T	HexNAc(6)Hex(7)NeuAc(1)	386	>sp|P07911|UROM_HUMAN Uromodulin OS=Homo sapiens OX=9606 GN=UMOD PE=1 SV=1	3961.54	0	0	0	0	0	0	0	0	0	0	0	1.39364e+07	0	0	8.62213e+06	1.2733e+07	0	0
R.DGPC[+57.02146]GTVLTRN[+3575.26953]E.T	HexNAc(7)Hex(7)Fuc(1)NeuAc(3)	386	>sp|P07911|UROM_HUMAN Uromodulin OS=Homo sapiens OX=9606 GN=UMOD PE=1 SV=1	4892.87	0	0	0	0	1.03992e+07	390864	0	0	3.65416e+06	0	0	0	0	0	0	0	0	0
R.N[+203.07937]ETHATYSNTLYLADE.I	HexNAc(1)	396	>sp|P07911|UROM_HUMAN Uromodulin OS=Homo sapiens OX=9606 GN=UMOD PE=1 SV=1	2043.89	8.04517e+07	0	0	2.36253e+08	0	0	0	3.42992e+07	0	0	0	0	0	0	0	0	0	0
R.N[+2237.78267]ETHATYSNTLYLADE.I	HexNAc(4)Hex(7)NeuAc(1)	396	>sp|P07911|UROM_HUMAN Uromodulin OS=Homo sapiens OX=9606 GN=UMOD PE=1 SV=1	4078.59	0	0	8.07724e+07	0	0	3.33999e+07	7.24584e+07	0	0	0	0	0	0	0	0	0	0	0
R.N[+2627.94650]ETHATYSNTLYLADE.I	HexNAc(6)Hex(6)Fuc(1)NeuAc(1)	396	>sp|P07911|UROM_HUMAN Uromodulin OS=Homo sapiens OX=9606 GN=UMOD PE=1 SV=1	4468.76	0	0	5.13203e+07	0	5.79015e+07	0	1.04084e+08	0	0	0	0	0	0	0	0	0	0	0
R.N[+3007.05796]ETHATYSNTLYLADE.I	HexNAc(5)Hex(6)Fuc(1)NeuAc(3)	396	>sp|P07911|UROM_HUMAN Uromodulin OS=Homo sapiens OX=9606 GN=UMOD PE=1 SV=1	4847.87	8.21897e+07	0	5.65325e+07	0	3.35516e+06	0	0	0	0	0	0	0	0	0	0	0	0	0
R.N[+1913.67702]ETHATYSNTLYLADEIIIR.D	HexNAc(4)Hex(5)NeuAc(1)	396	>sp|P07911|UROM_HUMAN Uromodulin OS=Homo sapiens OX=9606 GN=UMOD PE=1 SV=1	4249.84	5.30372e+07	0	0	0	0	0	29536856	6.47521e+07	0	0	0	0	0	0	0	0	0	0
R.N[+2498.90391]ETHATYSNTLYLADE.I	HexNAc(6)Hex(7)Fuc(1)	396	>sp|P07911|UROM_HUMAN Uromodulin OS=Homo sapiens OX=9606 GN=UMOD PE=1 SV=1	4339.72	2.36837e+09	0	0	3.85581e+09	9.01374e+08	0	0	0	0	0	0	0	0	0	0	0	0	0
R.FALLMTNC[+57.02146]YATPSSN[+1825.66098]ATDPLK.Y	HexNAc(5)Hex(5)	499	>sp|P07911|UROM_HUMAN Uromodulin OS=Homo sapiens OX=9606 GN=UMOD PE=1 SV=1	4139.76	1.30992e+08	7.32414e+07	0	6.53411e+07	0	0	0	0	0	0	0	0	0	0	0	0	0	0
R.FALLMTNC[+57.02146]YATPSSN[+2174.79826]ATDPLK.Y	HexNAc(6)Hex(5)Fuc(1)	499	>sp|P07911|UROM_HUMAN Uromodulin OS=Homo sapiens OX=9606 GN=UMOD PE=1 SV=1	4488.9	0	4.64222e+07	0	14857632	0	0	0	14567068	0	0	0	0	0	0	0	0	0	0
R.FALLMTNC[+57.02146]YATPSSN[+2215.82481]ATDPLK.Y	HexNAc(7)Hex(4)Fuc(1)	499	>sp|P07911|UROM_HUMAN Uromodulin OS=Homo sapiens OX=9606 GN=UMOD PE=1 SV=1	4529.92	0	1.77877e+07	0	4.90159e+06	0	0	0	1.61656e+06	0	0	0	0	0	0	0	0	0	0
R.FALLMTNC[+57.02146]YATPSSN[+2278.80922]ATDPLK.Y	HexNAc(5)Hex(6)NeuAc(1)	499	>sp|P07911|UROM_HUMAN Uromodulin OS=Homo sapiens OX=9606 GN=UMOD PE=1 SV=1	4592.91	0	0	0	0	4.27718e+06	957092	0	4.90215e+06	0	0	0	0	0	0	0	0	0	0
R.FALLMTNC[+57.02146]YATPSSN[+2864.03611]ATDPLK.Y	HexNAc(7)Hex(8)Fuc(1)	499	>sp|P07911|UROM_HUMAN Uromodulin OS=Homo sapiens OX=9606 GN=UMOD PE=1 SV=1	5178.13	0	0	0	47655232	1.11463e+08	0	0	5.19171e+07	0	0	0	0	0	0	0	0	0	0
R.FALLMTNC[+57.02146]YATPSSN[+3737.32236]ATDPLK.Y	HexNAc(7)Hex(8)Fuc(1)NeuAc(3)	499	>sp|P07911|UROM_HUMAN Uromodulin OS=Homo sapiens OX=9606 GN=UMOD PE=1 SV=1	6051.42	0	0	0	0	1.08833e+07	0	2.46278e+06	4.54647e+06	0	0	0	0	0	0	0	0	0	0
R.FALLM[+15.99492]TNC[+57.02146]YATPSSN[+1872.65048]ATDPLK.Y	HexNAc(3)Hex(6)NeuAc(1)	499	>sp|P07911|UROM_HUMAN Uromodulin OS=Homo sapiens OX=9606 GN=UMOD PE=1 SV=1	4202.74	3.13533e+06	0	0	0	8322706	0	3.6036e+06	0	0	0	0	0	0	0	0	0	0	0
R.FALLM[+15.99492]TNC[+57.02146]YATPSSN[+2596.95192]ATDPLK.Y	HexNAc(8)Hex(6)	499	>sp|P07911|UROM_HUMAN Uromodulin OS=Homo sapiens OX=9606 GN=UMOD PE=1 SV=1	4927.04	80471512	0	0	0	56006508	0	0	42376248	0	0	0	0	0	0	0	0	0	0
R.FALLM[+15.99492]TNC[+57.02146]YATPSSN[+3048.08451]ATDPLK.Y	HexNAc(6)Hex(5)Fuc(1)NeuAc(3)	499	>sp|P07911|UROM_HUMAN Uromodulin OS=Homo sapiens OX=9606 GN=UMOD PE=1 SV=1	5378.18	164731888	0	0	0	1.93682e+08	0	39181916	0	0	0	0	0	0	0	0	0	0	0
R.FALLM[+15.99492]TNC[+57.02146]YATPSSN[+3276.15780]ATDPLK.Y	HexNAc(6)Hex(10)Fuc(1)NeuAc(1)	499	>sp|P07911|UROM_HUMAN Uromodulin OS=Homo sapiens OX=9606 GN=UMOD PE=1 SV=1	5606.25	0	0	1.41951e+06	0	751368	573755	0	0	0	0	0	0	0	0	0	0	0	0
R.FALLM[+15.99492]TNC[+57.02146]YATPSSN[+3663.28558]ATDPLK.Y	HexNAc(6)Hex(7)Fuc(1)NeuAc(4)	499	>sp|P07911|UROM_HUMAN Uromodulin OS=Homo sapiens OX=9606 GN=UMOD PE=1 SV=1	5993.38	0	0	1.11795e+06	0	4.23754e+06	0	0	0	0	0	0	1.45597e+06	0	0	0	0	0	0
R.FALLMTNC[+57.02146]YATPSSN[+1913.67702]ATDPLK.Y	HexNAc(4)Hex(5)NeuAc(1)	499	>sp|P07911|UROM_HUMAN Uromodulin OS=Homo sapiens OX=9606 GN=UMOD PE=1 SV=1	4227.77	0	0	0	2.41568e+07	0	1.02261e+07	0	2.55303e+07	0	0	0	0	0	0	0	0	0	0
R.FALLMTNC[+57.02146]YATPSSN[+2075.72985]ATDPLK.Y	HexNAc(4)Hex(6)NeuAc(1)	499	>sp|P07911|UROM_HUMAN Uromodulin OS=Homo sapiens OX=9606 GN=UMOD PE=1 SV=1	4389.83	0	2449622	2.05652e+06	0	0	0	0	0	0	0	0	18441254	0	0	0	0	0	0
R.FALLMTNC[+57.02146]YATPSSN[+2459.93073]ATDPLK.Y	HexNAc(9)Hex(3)Fuc(1)	499	>sp|P07911|UROM_HUMAN Uromodulin OS=Homo sapiens OX=9606 GN=UMOD PE=1 SV=1	4774.03	0	60617396	1.76333e+07	0	0	0	97405816	0	0	0	0	0	0	0	0	0	0	0
R.FALLMTNC[+57.02146]YATPSSN[+2498.90391]ATDPLK.Y	HexNAc(6)Hex(7)Fuc(1)	499	>sp|P07911|UROM_HUMAN Uromodulin OS=Homo sapiens OX=9606 GN=UMOD PE=1 SV=1	4813	0	0	0	13381335	0	0	2.00715e+07	1.22743e+07	0	0	0	0	0	0	0	0	0	0
R.FALLMTNC[+57.02146]YATPSSN[+3155.13152]ATDPLK.Y	HexNAc(7)Hex(8)Fuc(1)NeuAc(1)	499	>sp|P07911|UROM_HUMAN Uromodulin OS=Homo sapiens OX=9606 GN=UMOD PE=1 SV=1	5469.23	0	0	0	0	0	1.65936e+07	7.00907e+06	5.00019e+06	0	0	0	0	0	0	0	0	0	0
R.FALLM[+15.99492]TNC[+57.02146]YATPSSN[+2133.77171]ATDPLK.Y	HexNAc(5)Hex(6)Fuc(1)	499	>sp|P07911|UROM_HUMAN Uromodulin OS=Homo sapiens OX=9606 GN=UMOD PE=1 SV=1	4463.86	0	0	0	7709442	0	0	0	27927032	0	0	0	9137855	0	0	0	0	0	0
R.FALLM[+15.99492]TNC[+57.02146]YATPSSN[+2555.92537]ATDPLK.Y	HexNAc(7)Hex(7)	499	>sp|P07911|UROM_HUMAN Uromodulin OS=Homo sapiens OX=9606 GN=UMOD PE=1 SV=1	4886.02	363890784	0	225392880	0	4.24362e+08	0	0	0	0	0	0	0	0	0	0	0	0	0
R.FALLM[+15.99492]TNC[+57.02146]YATPSSN[+2627.94650]ATDPLK.Y	HexNAc(6)Hex(6)Fuc(1)NeuAc(1)	499	>sp|P07911|UROM_HUMAN Uromodulin OS=Homo sapiens OX=9606 GN=UMOD PE=1 SV=1	4958.04	0	0	0	0	5.2448e+06	499477	1.48976e+06	0	0	0	0	0	0	0	0	0	0	0
R.FALLM[+15.99492]TNC[+57.02146]YATPSSN[+3448.24259]ATDPLK.Y	HexNAc(9)Hex(10)	499	>sp|P07911|UROM_HUMAN Uromodulin OS=Homo sapiens OX=9606 GN=UMOD PE=1 SV=1	5778.33	0	0	142863488	0	204598928	0	0	0	51880248	0	0	0	0	0	0	0	0	0
R.WC[+57.02146]SEC[+57.02146]HSN[+3663.28558]ATC[+57.02146]TEDE.A	HexNAc(6)Hex(7)Fuc(1)NeuAc(4)	31	>sp|P07911|UROM_HUMAN Uromodulin OS=Homo sapiens OX=9606 GN=UMOD PE=1 SV=1	5547.92	1.1081e+08	1.38756e+08	0	6.729e+06	6938749	0	0	0	0	0	0	0	0	0	0	0	0	0
E.C[+57.02146]HSN[+3866.36495]ATC[+57.02146]TE.D	HexNAc(7)Hex(7)Fuc(1)NeuAc(4)	35	>sp|P07911|UROM_HUMAN Uromodulin OS=Homo sapiens OX=9606 GN=UMOD PE=1 SV=1	4944.75	2.19545e+06	2.40919e+06	0	0	0	981085	296631	0	0	0	0	0	0	0	0	0	0	0
E.C[+57.02146]HSN[+3226.13225]ATC[+57.02146]TEDE.A	HexNAc(6)Hex(7)NeuAc(3)	35	>sp|P07911|UROM_HUMAN Uromodulin OS=Homo sapiens OX=9606 GN=UMOD PE=1 SV=1	4548.58	0	2.80323e+07	0	8.28609e+07	0	0	7.01567e+06	3.97801e+07	0	0	0	0	0	0	0	0	0	0
E.C[+57.02146]HSN[+3081.09474]ATC[+57.02146]TEDEAVTTC[+57.02146]TC[+57.02146]QE.G	HexNAc(6)Hex(7)Fuc(1)NeuAc(2)	35	>sp|P07911|UROM_HUMAN Uromodulin OS=Homo sapiens OX=9606 GN=UMOD PE=1 SV=1	5453.96	14095302	1.00243e+08	0	1.82723e+07	0	0	0	0	2.84151e+07	0	0	0	0	0	0	0	0	0
E.C[+57.02146]HSN[+3210.13734]ATC[+57.02146]TEDEAVTTC[+57.02146]TC[+57.02146]QE.G	HexNAc(6)Hex(6)Fuc(1)NeuAc(3)	35	>sp|P07911|UROM_HUMAN Uromodulin OS=Homo sapiens OX=9606 GN=UMOD PE=1 SV=1	5583	5682742	2.30143e+06	0	0	0	0	0	2.45483e+06	2320768	0	0	0	0	0	0	0	0	0
E.C[+57.02146]HSN[+3226.13225]ATC[+57.02146]TEDEAVTTC[+57.02146]TC[+57.02146]QE.G	HexNAc(6)Hex(7)NeuAc(3)	35	>sp|P07911|UROM_HUMAN Uromodulin OS=Homo sapiens OX=9606 GN=UMOD PE=1 SV=1	5598.99	0	5.34814e+06	0	12312973	1.42634e+06	0	0	11187953	0	0	0	0	0	0	0	0	0	0
R.C[+57.02146]NTAAPMWLN[+1768.63952]GTHPSSDE.G	HexNAc(4)Hex(5)Fuc(1)	223	>sp|P07911|UROM_HUMAN Uromodulin OS=Homo sapiens OX=9606 GN=UMOD PE=1 SV=1	3755.46	0	5.62732e+07	0	8.33482e+07	1.41275e+07	0	0	1.92076e+06	0	0	0	0	0	0	0	0	0	0
R.C[+57.02146]NTAAPMWLN[+1809.66607]GTHPSSDE.G	HexNAc(5)Hex(4)Fuc(1)	223	>sp|P07911|UROM_HUMAN Uromodulin OS=Homo sapiens OX=9606 GN=UMOD PE=1 SV=1	3796.49	0	1.20603e+08	0	8.33915e+07	4.34018e+07	0	0	0	8.95287e+06	0	0	0	0	0	0	0	0	0
R.C[+57.02146]NTAAPMWLN[+2350.79263]GTHPSSDE.G	HexNAc(2)Hex(12)	223	>sp|P07911|UROM_HUMAN Uromodulin OS=Homo sapiens OX=9606 GN=UMOD PE=1 SV=1	4337.61	0	358220800	0	0	0	0	99047144	0	114054656	0	0	11584268	0	0	0	0	0	0
R.C[+57.02146]NTAAPMWLN[+2432.88345]GTHPSSDE.G	HexNAc(6)Hex(3)Fuc(1)NeuAc(2)	223	>sp|P07911|UROM_HUMAN Uromodulin OS=Homo sapiens OX=9606 GN=UMOD PE=1 SV=1	4419.7	4.54486e+07	5.1913e+07	0	7.66832e+07	1.37928e+08	0	0	0	0	0	0	0	0	0	0	0	0	0
R.C[+57.02146]NTAAPMWLN[+3210.13734]GTHPSSDE.G	HexNAc(6)Hex(6)Fuc(1)NeuAc(3)	223	>sp|P07911|UROM_HUMAN Uromodulin OS=Homo sapiens OX=9606 GN=UMOD PE=1 SV=1	5196.96	35269512	1.15133e+07	0	8.78647e+06	9.90024e+06	0	0	0	0	0	0	0	0	0	0	0	0	0
R.C[+57.02146]NTAAPMWLN[+3372.19016]GTHPSSDE.G	HexNAc(6)Hex(7)Fuc(1)NeuAc(3)	223	>sp|P07911|UROM_HUMAN Uromodulin OS=Homo sapiens OX=9606 GN=UMOD PE=1 SV=1	5359.01	0	2.55712e+07	0	4.4565e+07	0	0	7.35972e+06	0	0	0	0	565167	0	0	0	0	0	0
R.C[+57.02146]NTAAPMWLN[+1809.66607]GTHPSSDEGIVSR.K	HexNAc(5)Hex(4)Fuc(1)	223	>sp|P07911|UROM_HUMAN Uromodulin OS=Homo sapiens OX=9606 GN=UMOD PE=1 SV=1	4308.79	1.6144e+07	5.02774e+06	0	7.77393e+06	3.24296e+06	0	0	0	0	0	0	0	0	0	0	0	0	0
R.C[+57.02146]NTAAPMWLN[+1850.69261]GTHPSSDEGIVSR.K	HexNAc(6)Hex(3)Fuc(1)	223	>sp|P07911|UROM_HUMAN Uromodulin OS=Homo sapiens OX=9606 GN=UMOD PE=1 SV=1	4349.82	20524374	60237928	0	96623040	2976963	0	0	0	0	0	0	0	0	0	0	0	0	0
R.C[+57.02146]NTAAPMWLN[+203.07937]GTHPSSDEGIVSR.K	HexNAc(1)	223	>sp|P07911|UROM_HUMAN Uromodulin OS=Homo sapiens OX=9606 GN=UMOD PE=1 SV=1	2702.21	5.81321e+07	1.22225e+08	0	9.1238e+07	0	0	0	7.8699e+06	0	0	0	0	0	0	0	0	0	0
R.C[+57.02146]NTAAPMWLN[+2092.74516]GTHPSSDEGIVSR.K	HexNAc(4)Hex(7)Fuc(1)	223	>sp|P07911|UROM_HUMAN Uromodulin OS=Homo sapiens OX=9606 GN=UMOD PE=1 SV=1	4591.87	0	6.55147e+06	5370770	0	0	3.08531e+06	0	60992776	0	0	0	0	0	0	0	0	0	0
R.C[+57.02146]NTAAPMWLN[+2481.88859]GTHPSSDEGIVSR.K	HexNAc(6)Hex(6)NeuAc(1)	223	>sp|P07911|UROM_HUMAN Uromodulin OS=Homo sapiens OX=9606 GN=UMOD PE=1 SV=1	4981.02	49564256	29388868	0	8.36665e+06	9424713	0	0	0	0	0	0	0	0	0	0	0	0	0
R.C[+57.02146]NTAAPMWLN[+349.13728]GTHPSSDEGIVSR.K	HexNAc(1)Fuc(1)	223	>sp|P07911|UROM_HUMAN Uromodulin OS=Homo sapiens OX=9606 GN=UMOD PE=1 SV=1	2848.26	1.773e+07	2.65975e+07	0	7.77882e+07	1.70641e+07	0	0	0	0	0	0	0	0	0	0	0	0	0
R.C[+57.02146]NTAAPMWLN[+1663.60816]GTHPSSDE.G	HexNAc(5)Hex(4)	223	>sp|P07911|UROM_HUMAN Uromodulin OS=Homo sapiens OX=9606 GN=UMOD PE=1 SV=1	3650.43	3.70459e+07	1.43039e+08	0	7.94535e+07	1.45973e+07	0	0	0	0	0	0	0	0	0	0	0	0	0
R.C[+57.02146]NTAAPMWLN[+1850.69261]GTHPSSDE.G	HexNAc(6)Hex(3)Fuc(1)	223	>sp|P07911|UROM_HUMAN Uromodulin OS=Homo sapiens OX=9606 GN=UMOD PE=1 SV=1	3837.51	51330196	196009280	0	254995568	15021458	0	0	0	0	0	0	0	0	0	0	0	0	0
R.C[+57.02146]NTAAPMWLN[+1913.67702]GTHPSSDE.G	HexNAc(4)Hex(5)NeuAc(1)	223	>sp|P07911|UROM_HUMAN Uromodulin OS=Homo sapiens OX=9606 GN=UMOD PE=1 SV=1	3900.5	3.51917e+07	0	0	1.57006e+07	3.72691e+07	0	0	5.48999e+07	0	0	0	0	0	0	0	0	0	0
R.C[+57.02146]NTAAPMWLN[+2012.74544]GTHPSSDE.G	HexNAc(6)Hex(4)Fuc(1)	223	>sp|P07911|UROM_HUMAN Uromodulin OS=Homo sapiens OX=9606 GN=UMOD PE=1 SV=1	3999.57	1.36138e+09	6.43845e+07	0	1.26111e+08	1.21987e+08	0	0	0	0	0	0	0	0	0	0	0	0	0
R.C[+57.02146]NTAAPMWLN[+2141.78803]GTHPSSDE.G	HexNAc(6)Hex(3)Fuc(1)NeuAc(1)	223	>sp|P07911|UROM_HUMAN Uromodulin OS=Homo sapiens OX=9606 GN=UMOD PE=1 SV=1	4128.61	98058408	294903200	0	158790416	50423588	0	0	0	0	0	0	0	0	0	0	0	0	0
R.C[+57.02146]NTAAPMWLN[+2188.73980]GTHPSSDE.G	HexNAc(2)Hex(11)	223	>sp|P07911|UROM_HUMAN Uromodulin OS=Homo sapiens OX=9606 GN=UMOD PE=1 SV=1	4175.56	0	0	0	0	2.95485e+07	0	2.29226e+07	6.20115e+07	3.68617e+07	0	0	0	0	0	0	0	0	0
R.C[+57.02146]NTAAPMWLN[+2237.78267]GTHPSSDE.G	HexNAc(4)Hex(7)NeuAc(1)	223	>sp|P07911|UROM_HUMAN Uromodulin OS=Homo sapiens OX=9606 GN=UMOD PE=1 SV=1	4224.6	3.6049e+06	1.24593e+07	0	1.66904e+07	0	3.81629e+07	0	0	0	0	0	0	0	0	0	0	0	0
R.C[+57.02146]NTAAPMWLN[+2498.90391]GTHPSSDE.G	HexNAc(6)Hex(7)Fuc(1)	223	>sp|P07911|UROM_HUMAN Uromodulin OS=Homo sapiens OX=9606 GN=UMOD PE=1 SV=1	4485.72	4.28835e+07	8.42937e+07	4.6296e+06	0	3.30708e+07	0	0	0	0	0	0	0	0	0	0	0	0	0
R.C[+57.02146]NTAAPMWLN[+2580.95701]GTHPSSDE.G	HexNAc(8)Hex(5)Fuc(1)	223	>sp|P07911|UROM_HUMAN Uromodulin OS=Homo sapiens OX=9606 GN=UMOD PE=1 SV=1	4567.78	2.4103e+07	1.0727e+08	0	2.35893e+08	2.65785e+08	0	0	0	0	0	0	0	0	0	0	0	0	0
R.C[+57.02146]NTAAPM[+15.99492]WLN[+2075.72985]GTHPSSDE.G	HexNAc(4)Hex(6)NeuAc(1)	223	>sp|P07911|UROM_HUMAN Uromodulin OS=Homo sapiens OX=9606 GN=UMOD PE=1 SV=1	4078.54	0	12795452416	0	16479206400	0	0	0	0	6413537	0	0	11921666	0	0	0	0	0	0
R.C[+57.02146]NTAAPM[+15.99492]WLN[+2221.78776]GTHPSSDE.G	HexNAc(4)Hex(6)Fuc(1)NeuAc(1)	223	>sp|P07911|UROM_HUMAN Uromodulin OS=Homo sapiens OX=9606 GN=UMOD PE=1 SV=1	4224.6	1.38578e+08	1.11012e+08	0	3.8903e+07	0	1.21141e+08	0	0	0	0	0	0	0	0	0	0	0	0
R.C[+57.02146]NTAAPM[+15.99492]WLN[+2391.85690]GTHPSSDE.G	HexNAc(5)Hex(4)Fuc(1)NeuAc(2)	223	>sp|P07911|UROM_HUMAN Uromodulin OS=Homo sapiens OX=9606 GN=UMOD PE=1 SV=1	4394.67	2.65601e+08	0	0	0	3.47628e+06	1.05389e+07	973876	0	0	0	0	0	0	0	0	0	0	0
R.C[+57.02146]NTAAPM[+15.99492]WLN[+2407.85181]GTHPSSDE.G	HexNAc(5)Hex(5)NeuAc(2)	223	>sp|P07911|UROM_HUMAN Uromodulin OS=Homo sapiens OX=9606 GN=UMOD PE=1 SV=1	4410.67	2.35351e+07	0	0	0	0	3.12806e+07	5.12441e+06	0	8.12195e+08	0	0	0	0	0	0	0	0	0
R.C[+57.02146]NTAAPM[+15.99492]WLN[+2424.86713]GTHPSSDE.G	HexNAc(5)Hex(6)Fuc(1)NeuAc(1)	223	>sp|P07911|UROM_HUMAN Uromodulin OS=Homo sapiens OX=9606 GN=UMOD PE=1 SV=1	4427.68	66919300	0	0	16771653	22262168	37849004	0	0	0	0	0	0	0	0	0	0	0	0
R.C[+57.02146]NTAAPM[+15.99492]WLN[+2569.90464]GTHPSSDE.G	HexNAc(5)Hex(6)NeuAc(2)	223	>sp|P07911|UROM_HUMAN Uromodulin OS=Homo sapiens OX=9606 GN=UMOD PE=1 SV=1	4572.72	0	4.4229e+06	0	20439514	0	11498604	0	0	135547104	0	0	0	0	0	0	0	0	0
R.C[+57.02146]NTAAPMWLN[+2295.82454]GTHPSSDEGIVSR.K	HexNAc(5)Hex(7)Fuc(1)	223	>sp|P07911|UROM_HUMAN Uromodulin OS=Homo sapiens OX=9606 GN=UMOD PE=1 SV=1	4794.95	0	9.19577e+07	1.61686e+06	5.23361e+06	5.21909e+06	0	0	0	0	0	0	0	0	0	0	0	0	0
R.C[+57.02146]NTAAPMWLN[+3276.15780]GTHPSSDEGIVSR.K	HexNAc(6)Hex(10)Fuc(1)NeuAc(1)	223	>sp|P07911|UROM_HUMAN Uromodulin OS=Homo sapiens OX=9606 GN=UMOD PE=1 SV=1	5775.28	0	2.64726e+06	0	0	0	0	21595968	0	1.69961e+06	0	0	492953792	0	0	0	0	0	0
R.C[+57.02146]NTAAPM[+15.99492]WLN[+1704.63471]GTHPSSDEGIVSR.K	HexNAc(6)Hex(3)	223	>sp|P07911|UROM_HUMAN Uromodulin OS=Homo sapiens OX=9606 GN=UMOD PE=1 SV=1	4219.76	0	11998298	0	7.29558e+06	0	1.98248e+06	4215918	0	0	0	0	0	0	0	0	0	0	0
R.C[+57.02146]NTAAPM[+15.99492]WLN[+2100.76148]GTHPSSDEGIVSR.K	HexNAc(5)Hex(4)Fuc(1)NeuAc(1)	223	>sp|P07911|UROM_HUMAN Uromodulin OS=Homo sapiens OX=9606 GN=UMOD PE=1 SV=1	4615.88	33200952	4.41197e+07	0	0	21587898	12627064	0	0	0	0	0	0	0	0	0	0	0	0
R.C[+57.02146]NTAAPM[+15.99492]WLN[+2221.78776]GTHPSSDEGIVSR.K	HexNAc(4)Hex(6)Fuc(1)NeuAc(1)	223	>sp|P07911|UROM_HUMAN Uromodulin OS=Homo sapiens OX=9606 GN=UMOD PE=1 SV=1	4736.91	0	0	0	58530860	0	5.72358e+07	8766194	0	0	0	0	3.85394e+07	0	0	0	0	0	0
R.C[+57.02146]NTAAPM[+15.99492]WLN[+2262.81431]GTHPSSDEGIVSR.K	HexNAc(5)Hex(5)Fuc(1)NeuAc(1)	223	>sp|P07911|UROM_HUMAN Uromodulin OS=Homo sapiens OX=9606 GN=UMOD PE=1 SV=1	4777.94	0	0	6137713	70645696	0	26487846	0	0	0	0	0	13754918	0	0	0	0	0	0
R.C[+57.02146]NTAAPM[+15.99492]WLN[+2350.79263]GTHPSSDEGIVSR.K	HexNAc(2)Hex(12)	223	>sp|P07911|UROM_HUMAN Uromodulin OS=Homo sapiens OX=9606 GN=UMOD PE=1 SV=1	4865.91	6429513	0	0	0	0	0	0	4.53016e+07	151256400	0	0	3427029	0	0	0	0	0	0
R.C[+57.02146]NTAAPM[+15.99492]WLN[+2391.85690]GTHPSSDEGIVSR.K	HexNAc(5)Hex(4)Fuc(1)NeuAc(2)	223	>sp|P07911|UROM_HUMAN Uromodulin OS=Homo sapiens OX=9606 GN=UMOD PE=1 SV=1	4906.98	6546020	32094996	0	29172278	0	4.63963e+06	0	0	0	0	0	0	0	0	0	0	0	0
R.C[+57.02146]NTAAPM[+15.99492]WLN[+2553.90972]GTHPSSDEGIVSR.K	HexNAc(5)Hex(5)Fuc(1)NeuAc(2)	223	>sp|P07911|UROM_HUMAN Uromodulin OS=Homo sapiens OX=9606 GN=UMOD PE=1 SV=1	5069.03	0	0	19771194	0	688419	1.11374e+07	8777045	0	0	0	0	0	0	0	0	0	0	0
R.C[+57.02146]NTAAPM[+15.99492]WLN[+2715.96255]GTHPSSDEGIVSR.K	HexNAc(5)Hex(6)Fuc(1)NeuAc(2)	223	>sp|P07911|UROM_HUMAN Uromodulin OS=Homo sapiens OX=9606 GN=UMOD PE=1 SV=1	5231.08	0	4.75027e+06	0	0	0	0	1.66968e+06	2.85356e+06	8201918	0	0	0	0	0	0	0	0	0
R.C[+57.02146]NTAAPM[+15.99492]WLN[+3155.13152]GTHPSSDEGIVSR.K	HexNAc(7)Hex(8)Fuc(1)NeuAc(1)	223	>sp|P07911|UROM_HUMAN Uromodulin OS=Homo sapiens OX=9606 GN=UMOD PE=1 SV=1	5670.25	0	0	4.62758e+06	1.7823e+07	5.39022e+06	0	0	0	0	0	0	1.67993e+06	0	0	0	0	0	0
K.AC[+57.02146]AGGYYVYN[+3009.07361]LTAPPEC[+57.02146]HLAYC[+57.02146]TDPSSVE.G	HexNAc(7)Hex(8)NeuAc(1)	266	>sp|P07911|UROM_HUMAN Uromodulin OS=Homo sapiens OX=9606 GN=UMOD PE=1 SV=1	6273.46	0	0	23603680	21560126	40837448	0	8504831	0	0	0	0	0	0	0	0	0	0	0
K.AC[+57.02146]AGGYYVYN[+1216.42286]LTAPPEC[+57.02146]HLAYC[+57.02146]TDPSSVEGTC[+57.02146]E.E	HexNAc(2)Hex(5)	266	>sp|P07911|UROM_HUMAN Uromodulin OS=Homo sapiens OX=9606 GN=UMOD PE=1 SV=1	4927.95	30525588	0	0	10101407	0	0	0	16954894	23083810	0	0	0	0	0	0	0	0	0
K.AC[+57.02146]AGGYYVYN[+1768.63952]LTAPPE.C	HexNAc(4)Hex(5)Fuc(1)	266	>sp|P07911|UROM_HUMAN Uromodulin OS=Homo sapiens OX=9606 GN=UMOD PE=1 SV=1	3513.42	2.33283e+07	0	0	0	3.91636e+07	6.40727e+06	1.04997e+07	0	0	0	0	0	0	0	0	0	0	0
K.QDFN[+4028.41777]ITDISLLE.H	HexNAc(7)Hex(8)Fuc(1)NeuAc(4)	319	>sp|P07911|UROM_HUMAN Uromodulin OS=Homo sapiens OX=9606 GN=UMOD PE=1 SV=1	5435.11	35871720	0	1.42303e+07	3.42349e+07	0	0	0	0	0	5.48189e+06	0	0	0	0	0	0	0	0
R.DGPC[+57.02146]GTVLTRN[+1872.65048]E.T	HexNAc(3)Hex(6)NeuAc(1)	386	>sp|P07911|UROM_HUMAN Uromodulin OS=Homo sapiens OX=9606 GN=UMOD PE=1 SV=1	3190.25	0	0	0	0	0	8.56905e+06	0	0	0	0	0	0	4.25587e+06	0	1.25097e+07	1.17568e+07	0	0
R.DGPC[+57.02146]GTVLTRN[+349.13728]E.T	HexNAc(1)Fuc(1)	386	>sp|P07911|UROM_HUMAN Uromodulin OS=Homo sapiens OX=9606 GN=UMOD PE=1 SV=1	1666.74	4.9824e+07	1.28921e+07	0	4.18403e+07	0	0	0	0	1.02294e+07	0	0	0	0	0	0	0	0	0
R.DGPC[+57.02146]GTVLTRN[+2407.85181]E.T	HexNAc(5)Hex(5)NeuAc(2)	386	>sp|P07911|UROM_HUMAN Uromodulin OS=Homo sapiens OX=9606 GN=UMOD PE=1 SV=1	3725.45	0	0	0	1.75274e+07	0	3.7853e+07	0	0	0	0	0	0	0	0	8.69364e+07	3.98198e+07	0	0
R.DGPC[+57.02146]GTVLTRN[+2059.73493]ETHATYSNTLYLADE.I	HexNAc(4)Hex(5)Fuc(1)NeuAc(1)	386	>sp|P07911|UROM_HUMAN Uromodulin OS=Homo sapiens OX=9606 GN=UMOD PE=1 SV=1	4957.05	0	0	0	0	3.00071e+07	5495441	4.38383e+07	0	0	0	0	1.94835e+06	0	0	0	0	0	0
R.N[+3155.13152]ETHATYSNTLYLADE.I	HexNAc(7)Hex(8)Fuc(1)NeuAc(1)	396	>sp|P07911|UROM_HUMAN Uromodulin OS=Homo sapiens OX=9606 GN=UMOD PE=1 SV=1	4995.94	0	0	3.01611e+07	0	1.02485e+08	0	4.60923e+07	0	2.90773e+07	0	0	0	0	0	0	0	0	0
R.FALLMTNC[+57.02146]YATPSSN[+1907.71408]ATDPLK.Y	HexNAc(7)Hex(3)	499	>sp|P07911|UROM_HUMAN Uromodulin OS=Homo sapiens OX=9606 GN=UMOD PE=1 SV=1	4221.81	5.51468e+07	5.33112e+07	0	6.89789e+07	0	0	2.17405e+07	0	0	0	0	0	0	0	0	0	0	0
R.FALLMTNC[+57.02146]YATPSSN[+2717.97820]ATDPLK.Y	HexNAc(7)Hex(8)	499	>sp|P07911|UROM_HUMAN Uromodulin OS=Homo sapiens OX=9606 GN=UMOD PE=1 SV=1	5032.08	47763988	1.37551e+08	0	0	0	1.14626e+09	0	0	0	0	0	9627657	0	0	0	0	0	0
R.FALLM[+15.99492]TNC[+57.02146]YATPSSN[+2935.03683]ATDPLK.Y	HexNAc(6)Hex(7)NeuAc(2)	499	>sp|P07911|UROM_HUMAN Uromodulin OS=Homo sapiens OX=9606 GN=UMOD PE=1 SV=1	5265.13	4.19939e+06	0	2745014	0	0	0	12207759	2207194	0	0	0	0	0	0	0	0	0	0
R.FALLM[+15.99492]TNC[+57.02146]YATPSSN[+3226.13225]ATDPLK.Y	HexNAc(6)Hex(7)NeuAc(3)	499	>sp|P07911|UROM_HUMAN Uromodulin OS=Homo sapiens OX=9606 GN=UMOD PE=1 SV=1	5556.22	1.81344e+06	0	0	0	1.90296e+06	0	2.14305e+06	755876	0	0	0	0	0	0	0	0	0	0
R.FALLMTNC[+57.02146]YATPSSN[+1897.68211]ATDPLK.Y	HexNAc(4)Hex(4)Fuc(1)NeuAc(1)	499	>sp|P07911|UROM_HUMAN Uromodulin OS=Homo sapiens OX=9606 GN=UMOD PE=1 SV=1	4211.78	0	0	1.00274e+07	1.88186e+07	2.09491e+07	6.66846e+06	0	0	0	0	0	0	0	0	0	0	0	0
R.FALLMTNC[+57.02146]YATPSSN[+2221.78776]ATDPLK.Y	HexNAc(4)Hex(6)Fuc(1)NeuAc(1)	499	>sp|P07911|UROM_HUMAN Uromodulin OS=Homo sapiens OX=9606 GN=UMOD PE=1 SV=1	4535.89	6.00748e+06	0	0	6862010	0	7.74355e+06	5494298	0	0	0	0	0	0	0	0	0	0	0
R.FALLMTNC[+57.02146]YATPSSN[+2245.79899]ATDPLK.Y	HexNAc(5)Hex(4)NeuAc(2)	499	>sp|P07911|UROM_HUMAN Uromodulin OS=Homo sapiens OX=9606 GN=UMOD PE=1 SV=1	4559.9	15847785	17954294	13328871	16832646	0	0	0	0	0	0	0	0	0	0	0	0	0	0
R.FALLMTNC[+57.02146]YATPSSN[+2805.99424]ATDPLK.Y	HexNAc(6)Hex(8)NeuAc(1)	499	>sp|P07911|UROM_HUMAN Uromodulin OS=Homo sapiens OX=9606 GN=UMOD PE=1 SV=1	5120.09	26020684	0	0	0	2.46501e+06	0	0	7400732	38874432	0	0	0	0	0	0	0	0	0
R.FALLM[+15.99492]TNC[+57.02146]YATPSSN[+2391.85690]ATDPLK.Y	HexNAc(5)Hex(4)Fuc(1)NeuAc(2)	499	>sp|P07911|UROM_HUMAN Uromodulin OS=Homo sapiens OX=9606 GN=UMOD PE=1 SV=1	4721.95	20860550	0	130131168	0	8967701	22154998	0	0	0	0	0	0	0	0	0	0	0	0
R.FALLM[+15.99492]TNC[+57.02146]YATPSSN[+2432.88345]ATDPLK.Y	HexNAc(6)Hex(3)Fuc(1)NeuAc(2)	499	>sp|P07911|UROM_HUMAN Uromodulin OS=Homo sapiens OX=9606 GN=UMOD PE=1 SV=1	4762.98	85577288	0	7810958	9186539	8.1549e+07	0	0	0	0	0	0	0	0	0	0	0	0	0
R.FALLM[+15.99492]TNC[+57.02146]YATPSSN[+2553.90972]ATDPLK.Y	HexNAc(5)Hex(5)Fuc(1)NeuAc(2)	499	>sp|P07911|UROM_HUMAN Uromodulin OS=Homo sapiens OX=9606 GN=UMOD PE=1 SV=1	4884	0	0	3117190	0	8.00932e+06	2.85336e+07	0	0	0	0	0	3.20148e+07	0	0	0	0	0	0
E.C[+57.02146]HSN[+3372.19016]ATC[+57.02146]TEDE.A	HexNAc(6)Hex(7)Fuc(1)NeuAc(3)	35	>sp|P07911|UROM_HUMAN Uromodulin OS=Homo sapiens OX=9606 GN=UMOD PE=1 SV=1	4694.64	81780024	4.22886e+07	0	0	0	2.97454e+06	0	7.19211e+06	42726964	0	0	0	0	0	0	0	0	0
E.C[+57.02146]HSN[+3517.22767]ATC[+57.02146]TEDE.A	HexNAc(6)Hex(7)NeuAc(4)	35	>sp|P07911|UROM_HUMAN Uromodulin OS=Homo sapiens OX=9606 GN=UMOD PE=1 SV=1	4839.68	0	37167248	0	8.77629e+06	0	2.63893e+06	0	5.08885e+06	0	0	0	0	0	0	0	1.73419e+06	0	0
E.C[+57.02146]HSN[+3866.36495]ATC[+57.02146]TEDE.A	HexNAc(7)Hex(7)Fuc(1)NeuAc(4)	35	>sp|P07911|UROM_HUMAN Uromodulin OS=Homo sapiens OX=9606 GN=UMOD PE=1 SV=1	5188.82	11496672	2.8989e+06	0	3.0145e+07	0	0	308329	0	8.51581e+06	0	0	0	0	0	0	0	0	0
E.C[+57.02146]HSN[+3517.22767]ATC[+57.02146]TEDEAVTTC[+57.02146]TC[+57.02146]QE.G	HexNAc(6)Hex(7)NeuAc(4)	35	>sp|P07911|UROM_HUMAN Uromodulin OS=Homo sapiens OX=9606 GN=UMOD PE=1 SV=1	5890.09	0	6.06151e+06	7.23006e+06	0	14364834	0	0	0	0	0	0	22349358	0	0	4.62004e+06	0	0	0
E.C[+57.02146]HSN[+3866.36495]ATC[+57.02146]TEDEAVTTC[+57.02146]TC[+57.02146]QE.G	HexNAc(7)Hex(7)Fuc(1)NeuAc(4)	35	>sp|P07911|UROM_HUMAN Uromodulin OS=Homo sapiens OX=9606 GN=UMOD PE=1 SV=1	6239.23	36519080	12326614	0	0	30575982	0	10482937	4.06768e+06	0	0	0	0	0	0	0	0	0	0
R.C[+57.02146]NTAAPMWLN[+2256.85136]GTHPSSDE.G	HexNAc(8)Hex(3)Fuc(1)	223	>sp|P07911|UROM_HUMAN Uromodulin OS=Homo sapiens OX=9606 GN=UMOD PE=1 SV=1	4243.67	9.64877e+07	2.93101e+08	4.73692e+07	1.21173e+08	0	0	0	0	1.81198e+07	0	0	0	0	0	0	0	0	0
R.C[+57.02146]NTAAPMWLN[+2393.87255]GTHPSSDE.G	HexNAc(7)Hex(6)	223	>sp|P07911|UROM_HUMAN Uromodulin OS=Homo sapiens OX=9606 GN=UMOD PE=1 SV=1	4380.69	0	0	0	6.21675e+07	2.48504e+07	2.06703e+07	1.10337e+07	4.57855e+07	0	0	0	0	0	0	0	0	0	0
R.C[+57.02146]NTAAPMWLN[+2539.93046]GTHPSSDE.G	HexNAc(7)Hex(6)Fuc(1)	223	>sp|P07911|UROM_HUMAN Uromodulin OS=Homo sapiens OX=9606 GN=UMOD PE=1 SV=1	4526.75	0	1.69694e+08	39424660	0	46186344	10929238	75156008	0	0	0	0	0	0	0	0	0	0	0
R.C[+57.02146]NTAAPMWLN[+1897.68211]GTHPSSDEGIVSR.K	HexNAc(4)Hex(4)Fuc(1)NeuAc(1)	223	>sp|P07911|UROM_HUMAN Uromodulin OS=Homo sapiens OX=9606 GN=UMOD PE=1 SV=1	4396.81	0	139845472	0	169148448	88462088	12375155	92463064	0	0	0	0	0	0	0	0	0	0	0
R.C[+57.02146]NTAAPMWLN[+1938.70866]GTHPSSDEGIVSR.K	HexNAc(5)Hex(3)Fuc(1)NeuAc(1)	223	>sp|P07911|UROM_HUMAN Uromodulin OS=Homo sapiens OX=9606 GN=UMOD PE=1 SV=1	4437.84	0	293625536	0	113267512	75616152	0	0	1.74411e+07	106262472	0	0	0	0	0	0	0	0	0
R.C[+57.02146]NTAAPM[+15.99492]WLN[+3866.36495]GTHPSSDEGIVSR.K	HexNAc(7)Hex(7)Fuc(1)NeuAc(4)	223	>sp|P07911|UROM_HUMAN Uromodulin OS=Homo sapiens OX=9606 GN=UMOD PE=1 SV=1	6381.49	0	0	7082360	68774336	14313495	0	3.00168e+06	0	7602695	0	0	0	0	0	0	0	0	0
R.C[+57.02146]NTAAPMWLN[+1704.63471]GTHPSSDE.G	HexNAc(6)Hex(3)	223	>sp|P07911|UROM_HUMAN Uromodulin OS=Homo sapiens OX=9606 GN=UMOD PE=1 SV=1	3691.45	75772464	317323392	0	4.09682e+08	37760080	7.15371e+06	0	0	0	0	0	0	0	0	0	0	0	0
R.C[+57.02146]NTAAPMWLN[+2116.75640]GTHPSSDE.G	HexNAc(5)Hex(5)NeuAc(1)	223	>sp|P07911|UROM_HUMAN Uromodulin OS=Homo sapiens OX=9606 GN=UMOD PE=1 SV=1	4103.58	343200512	29703066	0	151896208	76858088	0	0	0	55609132	0	0	0	0	0	0	0	0	0
R.C[+57.02146]NTAAPMWLN[+2157.78295]GTHPSSDE.G	HexNAc(6)Hex(4)NeuAc(1)	223	>sp|P07911|UROM_HUMAN Uromodulin OS=Homo sapiens OX=9606 GN=UMOD PE=1 SV=1	4144.6	468246464	129021544	6107344	202363984	8.15871e+07	0	0	0	0	0	0	0	0	0	0	0	0	0
R.C[+57.02146]NTAAPMWLN[+2935.03683]GTHPSSDE.G	HexNAc(6)Hex(7)NeuAc(2)	223	>sp|P07911|UROM_HUMAN Uromodulin OS=Homo sapiens OX=9606 GN=UMOD PE=1 SV=1	4921.86	11062702	4.80318e+07	0	6.59013e+07	7.60459e+07	0	1.10399e+08	0	0	0	0	0	0	0	0	0	0	0
R.C[+57.02146]NTAAPM[+15.99492]WLN[+2059.73493]GTHPSSDE.G	HexNAc(4)Hex(5)Fuc(1)NeuAc(1)	223	>sp|P07911|UROM_HUMAN Uromodulin OS=Homo sapiens OX=9606 GN=UMOD PE=1 SV=1	4062.55	0	0	0	0	0	10610925	35282328	49347360	0	0	0	10933773	0	0	2.54514e+06	0	0	0
R.C[+57.02146]NTAAPM[+15.99492]WLN[+2100.76148]GTHPSSDE.G	HexNAc(5)Hex(4)Fuc(1)NeuAc(1)	223	>sp|P07911|UROM_HUMAN Uromodulin OS=Homo sapiens OX=9606 GN=UMOD PE=1 SV=1	4103.58	0	0	0	0	1.86254e+07	8.83706e+06	2.18542e+07	0	4.97313e+07	0	0	6.58419e+06	0	0	0	0	0	0
R.C[+57.02146]NTAAPMWLN[+1971.71889]GTHPSSDEGIVSR.K	HexNAc(5)Hex(5)Fuc(1)	223	>sp|P07911|UROM_HUMAN Uromodulin OS=Homo sapiens OX=9606 GN=UMOD PE=1 SV=1	4470.85	0	6.44711e+08	7588331	54560224	54910724	0	0	2.08802e+07	0	0	0	0	0	0	0	0	0	0
R.C[+57.02146]NTAAPMWLN[+2012.74544]GTHPSSDEGIVSR.K	HexNAc(6)Hex(4)Fuc(1)	223	>sp|P07911|UROM_HUMAN Uromodulin OS=Homo sapiens OX=9606 GN=UMOD PE=1 SV=1	4511.87	220791104	1.30123e+09	1.19642e+07	6.88746e+07	56392392	0	0	0	0	0	0	0	0	0	0	0	0	0
R.C[+57.02146]NTAAPMWLN[+2278.80922]GTHPSSDEGIVSR.K	HexNAc(5)Hex(6)NeuAc(1)	223	>sp|P07911|UROM_HUMAN Uromodulin OS=Homo sapiens OX=9606 GN=UMOD PE=1 SV=1	4777.94	67022924	0	0	175026960	2.09596e+06	0	66199484	62121112	0	0	0	0	0	0	0	0	0	0
R.C[+57.02146]NTAAPMWLN[+2465.89368]GTHPSSDEGIVSR.K	HexNAc(6)Hex(5)Fuc(1)NeuAc(1)	223	>sp|P07911|UROM_HUMAN Uromodulin OS=Homo sapiens OX=9606 GN=UMOD PE=1 SV=1	4965.02	150015888	1.38186e+08	0	3.05972e+08	1.04593e+08	4.02328e+07	0	0	0	0	0	0	0	0	0	0	0	0
R.C[+57.02146]NTAAPMWLN[+2701.98328]GTHPSSDEGIVSR.K	HexNAc(7)Hex(7)Fuc(1)	223	>sp|P07911|UROM_HUMAN Uromodulin OS=Homo sapiens OX=9606 GN=UMOD PE=1 SV=1	5201.11	1.97663e+08	1.31536e+08	0	3.517e+07	4.67093e+07	0	0	2.58893e+07	0	0	0	0	0	0	0	0	0	0
R.C[+57.02146]NTAAPM[+15.99492]WLN[+2026.68698]GTHPSSDEGIVSR.K	HexNAc(2)Hex(10)	223	>sp|P07911|UROM_HUMAN Uromodulin OS=Homo sapiens OX=9606 GN=UMOD PE=1 SV=1	4541.81	0	0	0	6.94338e+07	2.1785e+07	0	4.51394e+07	6.85823e+07	3.21655e+06	0	0	0	0	0	0	0	0	0
R.C[+57.02146]NTAAPM[+15.99492]WLN[+2278.80922]GTHPSSDEGIVSR.K	HexNAc(5)Hex(6)NeuAc(1)	223	>sp|P07911|UROM_HUMAN Uromodulin OS=Homo sapiens OX=9606 GN=UMOD PE=1 SV=1	4793.93	0	0	0	20179668	0	8826750	0	9809037	114593832	0	0	2.49745e+07	0	0	0	0	0	0
R.C[+57.02146]NTAAPM[+15.99492]WLN[+2643.94142]GTHPSSDEGIVSR.K	HexNAc(6)Hex(7)NeuAc(1)	223	>sp|P07911|UROM_HUMAN Uromodulin OS=Homo sapiens OX=9606 GN=UMOD PE=1 SV=1	5159.06	3.79411e+06	33939584	0	2.90346e+06	0	0	12849330	8784985	0	0	0	0	0	0	0	0	0	0
R.C[+57.02146]NTAAPM[+15.99492]WLN[+2756.98910]GTHPSSDEGIVSR.K	HexNAc(6)Hex(5)Fuc(1)NeuAc(2)	223	>sp|P07911|UROM_HUMAN Uromodulin OS=Homo sapiens OX=9606 GN=UMOD PE=1 SV=1	5272.11	0	8.54342e+07	0	2.21142e+08	2.85528e+07	0	9.87947e+06	0	6.79542e+06	0	0	0	0	0	0	0	0	0
R.C[+57.02146]NTAAPM[+15.99492]WLN[+3737.32236]GTHPSSDEGIVSR.K	HexNAc(7)Hex(8)Fuc(1)NeuAc(3)	223	>sp|P07911|UROM_HUMAN Uromodulin OS=Homo sapiens OX=9606 GN=UMOD PE=1 SV=1	6252.44	0	0	13962972	0	11108629	3.08746e+06	39658444	0	0	0	0	27474202	0	0	0	0	0	0
K.QDFN[+3737.32236]ITDISLLEHR.L	HexNAc(7)Hex(8)Fuc(1)NeuAc(3)	319	>sp|P07911|UROM_HUMAN Uromodulin OS=Homo sapiens OX=9606 GN=UMOD PE=1 SV=1	5437.18	0	0	0	0	152137264	40424080	0	1.74888e+07	49796292	0	0	6.8333e+07	0	0	0	0	0	0
R.DGPC[+57.02146]GTVLTRN[+1694.60274]E.T	HexNAc(3)Hex(4)Fuc(1)NeuAc(1)	386	>sp|P07911|UROM_HUMAN Uromodulin OS=Homo sapiens OX=9606 GN=UMOD PE=1 SV=1	3012.2	0	5004364	0	5761036	13700132	0	3.12286e+06	0	0	0	0	0	0	0	2.64138e+06	0	0	0
R.DGPC[+57.02146]GTVLTRN[+3226.13225]E.T	HexNAc(6)Hex(7)NeuAc(3)	386	>sp|P07911|UROM_HUMAN Uromodulin OS=Homo sapiens OX=9606 GN=UMOD PE=1 SV=1	4543.73	0	0	0	0	7.90417e+06	0	4.24623e+06	0	0	0	0	38793796	0	0	7008625	7.62248e+06	0	0
R.N[+1054.37004]ETHATYSNTLYLADE.I	HexNAc(2)Hex(4)	396	>sp|P07911|UROM_HUMAN Uromodulin OS=Homo sapiens OX=9606 GN=UMOD PE=1 SV=1	2895.18	2.11274e+07	3.14677e+07	0	0	1.77301e+07	0	8.47099e+06	9.93344e+06	0	0	0	0	0	0	0	0	0	0
R.N[+1987.71380]ETHATYSNTLYLADE.I	HexNAc(5)Hex(6)	396	>sp|P07911|UROM_HUMAN Uromodulin OS=Homo sapiens OX=9606 GN=UMOD PE=1 SV=1	3828.53	0	1.03645e+08	0	1.07563e+08	3.83251e+07	0	0	3.82495e+07	2.68916e+07	0	0	0	0	0	0	0	0	0
R.N[+2481.88859]ETHATYSNTLYLADE.I	HexNAc(6)Hex(6)NeuAc(1)	396	>sp|P07911|UROM_HUMAN Uromodulin OS=Homo sapiens OX=9606 GN=UMOD PE=1 SV=1	4322.7	6.77146e+07	3.9785e+07	0	2.0867e+08	5.56283e+07	0	0	5.31749e+07	0	0	0	0	0	0	0	0	0	0
R.N[+2643.94142]ETHATYSNTLYLADE.I	HexNAc(6)Hex(7)NeuAc(1)	396	>sp|P07911|UROM_HUMAN Uromodulin OS=Homo sapiens OX=9606 GN=UMOD PE=1 SV=1	4484.75	115062904	215212400	0	1.80034e+08	5.77185e+07	0	0	174414304	0	0	0	0	0	0	0	0	0	0
R.N[+3226.13225]ETHATYSNTLYLADE.I	HexNAc(6)Hex(7)NeuAc(3)	396	>sp|P07911|UROM_HUMAN Uromodulin OS=Homo sapiens OX=9606 GN=UMOD PE=1 SV=1	5066.94	3.67392e+06	20816790	8.28364e+07	0	0	0	0	56447408	39796640	0	0	0	0	0	0	0	0	0
R.N[+3284.17411]ETHATYSNTLYLADE.I	HexNAc(7)Hex(7)Fuc(1)NeuAc(2)	396	>sp|P07911|UROM_HUMAN Uromodulin OS=Homo sapiens OX=9606 GN=UMOD PE=1 SV=1	5124.99	0	0	8.21484e+07	9.33145e+07	6.56111e+07	0	4.18311e+07	6.35424e+07	0	0	0	0	0	0	0	0	0	0
R.FALLMTNC[+57.02146]YATPSSN[+1606.58669]ATDPLK.Y	HexNAc(4)Hex(4)Fuc(1)	499	>sp|P07911|UROM_HUMAN Uromodulin OS=Homo sapiens OX=9606 GN=UMOD PE=1 SV=1	3920.68	2.48614e+07	0	0	2.68396e+07	6.44469e+06	0	2.03701e+07	3.04667e+07	0	0	0	0	0	0	0	0	0	0
R.FALLMTNC[+57.02146]YATPSSN[+2204.77244]ATDPLK.Y	HexNAc(4)Hex(5)NeuAc(2)	499	>sp|P07911|UROM_HUMAN Uromodulin OS=Homo sapiens OX=9606 GN=UMOD PE=1 SV=1	4518.87	0	0	17823712	12119214	0	835149	0	23517024	3716767	0	0	0	0	0	0	0	0	0
R.FALLMTNC[+57.02146]YATPSSN[+2861.00005]ATDPLK.Y	HexNAc(5)Hex(6)NeuAc(3)	499	>sp|P07911|UROM_HUMAN Uromodulin OS=Homo sapiens OX=9606 GN=UMOD PE=1 SV=1	5175.1	3.84097e+06	0	0	0	0	577081	725572	5988126	3.13254e+06	0	0	0	0	0	0	0	0	0
R.FALLMTNC[+57.02146]YATPSSN[+3210.13734]ATDPLK.Y	HexNAc(6)Hex(6)Fuc(1)NeuAc(3)	499	>sp|P07911|UROM_HUMAN Uromodulin OS=Homo sapiens OX=9606 GN=UMOD PE=1 SV=1	5524.23	0	1.37559e+06	5875481	6.9795e+07	0	0	0	2.34434e+07	3.92896e+06	0	0	0	0	0	0	0	0	0
R.FALLMTNC[+57.02146]YATPSSN[+3284.17411]ATDPLK.Y	HexNAc(7)Hex(7)Fuc(1)NeuAc(2)	499	>sp|P07911|UROM_HUMAN Uromodulin OS=Homo sapiens OX=9606 GN=UMOD PE=1 SV=1	5598.27	36931260	0	0	0	65363980	0	16494966	40889336	6867572	0	0	0	0	0	0	0	0	0
R.FALLMTNC[+57.02146]YATPSSN[+349.13728]ATDPLK.Y	HexNAc(1)Fuc(1)	499	>sp|P07911|UROM_HUMAN Uromodulin OS=Homo sapiens OX=9606 GN=UMOD PE=1 SV=1	2663.23	2.02584e+08	102875976	0	2.97092e+08	0	0	0	1.41285e+08	6.11763e+07	0	0	0	0	0	0	0	0	0
R.FALLMTNC[+57.02146]YATPSSN[+2141.78803]ATDPLK.Y	HexNAc(6)Hex(3)Fuc(1)NeuAc(1)	499	>sp|P07911|UROM_HUMAN Uromodulin OS=Homo sapiens OX=9606 GN=UMOD PE=1 SV=1	4455.89	15163236	218961504	0	56029660	0	0	0	35733400	14143373	0	0	0	0	0	0	0	0	0
R.FALLMTNC[+57.02146]YATPSSN[+2586.91995]ATDPLK.Y	HexNAc(5)Hex(7)Fuc(1)NeuAc(1)	499	>sp|P07911|UROM_HUMAN Uromodulin OS=Homo sapiens OX=9606 GN=UMOD PE=1 SV=1	4901.02	0	30191152	0	0	10763021	10388666	3.44307e+06	0	0	0	0	4.24539e+06	0	0	0	0	0	0
R.FALLMTNC[+57.02146]YATPSSN[+2878.01537]ATDPLK.Y	HexNAc(5)Hex(7)Fuc(1)NeuAc(2)	499	>sp|P07911|UROM_HUMAN Uromodulin OS=Homo sapiens OX=9606 GN=UMOD PE=1 SV=1	5192.11	3.69216e+07	0	0	0	4.87858e+06	0	8.67657e+06	8.51363e+06	1.54374e+07	0	0	0	0	0	0	0	0	0
R.FALLM[+15.99492]TNC[+57.02146]YATPSSN[+3372.19016]ATDPLK.Y	HexNAc(6)Hex(7)Fuc(1)NeuAc(3)	499	>sp|P07911|UROM_HUMAN Uromodulin OS=Homo sapiens OX=9606 GN=UMOD PE=1 SV=1	5702.28	0	0	9.05926e+07	0	39482516	8544175	0	5.3452e+07	0	0	0	124404536	0	0	0	0	0	0
E.C[+57.02146]HSN[+3405.20039]ATC[+57.02146]TEDEAVTTC[+57.02146]TC[+57.02146]QE.G	HexNAc(6)Hex(9)Fuc(1)NeuAc(2)	35	>sp|P07911|UROM_HUMAN Uromodulin OS=Homo sapiens OX=9606 GN=UMOD PE=1 SV=1	5778.06	3.40876e+07	0	0	0	3.7381e+06	3.49961e+06	2.17259e+06	0	5.2672e+07	0	0	1.31078e+07	0	0	0	0	0	0
R.C[+57.02146]NTAAPMWLN[+2481.88859]GTHPSSDE.G	HexNAc(6)Hex(6)NeuAc(1)	223	>sp|P07911|UROM_HUMAN Uromodulin OS=Homo sapiens OX=9606 GN=UMOD PE=1 SV=1	4468.71	1.24916e+08	49478868	0	49759136	31218130	0	40088632	35290800	0	0	0	0	0	0	0	0	0	0
R.C[+57.02146]NTAAPMWLN[+2772.98401]GTHPSSDE.G	HexNAc(6)Hex(6)NeuAc(2)	223	>sp|P07911|UROM_HUMAN Uromodulin OS=Homo sapiens OX=9606 GN=UMOD PE=1 SV=1	4759.8	5.36748e+08	0	71361032	1.87677e+08	0	0	216732800	0	99708952	0	0	38768852	0	0	0	0	0	0
R.C[+57.02146]NTAAPM[+15.99492]WLN[+2432.88345]GTHPSSDE.G	HexNAc(6)Hex(3)Fuc(1)NeuAc(2)	223	>sp|P07911|UROM_HUMAN Uromodulin OS=Homo sapiens OX=9606 GN=UMOD PE=1 SV=1	4435.7	5.87597e+08	4.51303e+08	5.15924e+08	3.18989e+08	3.4556e+08	0	0	0	2.27869e+08	0	0	0	0	0	0	0	0	0
R.C[+57.02146]NTAAPMWLN[+2756.98910]GTHPSSDEGIVSR.K	HexNAc(6)Hex(5)Fuc(1)NeuAc(2)	223	>sp|P07911|UROM_HUMAN Uromodulin OS=Homo sapiens OX=9606 GN=UMOD PE=1 SV=1	5256.12	22835820	74159248	0	59524412	17240422	0	14500630	41771224	0	0	0	0	0	0	0	0	0	0
R.C[+57.02146]NTAAPMWLN[+2100.76148]GTHPSSDE.G	HexNAc(5)Hex(4)Fuc(1)NeuAc(1)	223	>sp|P07911|UROM_HUMAN Uromodulin OS=Homo sapiens OX=9606 GN=UMOD PE=1 SV=1	4087.58	561432256	1041720960	0	658102080	243544800	32102080	0	0	128210200	0	0	0	0	0	0	0	0	0
R.C[+57.02146]NTAAPMWLN[+2643.94142]GTHPSSDE.G	HexNAc(6)Hex(7)NeuAc(1)	223	>sp|P07911|UROM_HUMAN Uromodulin OS=Homo sapiens OX=9606 GN=UMOD PE=1 SV=1	4630.76	2.20766e+08	2.13027e+08	0	6.16921e+08	8.05389e+07	0	4.72753e+07	1.28219e+07	0	0	0	0	0	0	0	0	0	0
R.C[+57.02146]NTAAPM[+15.99492]WLN[+2878.01537]GTHPSSDE.G	HexNAc(5)Hex(7)Fuc(1)NeuAc(2)	223	>sp|P07911|UROM_HUMAN Uromodulin OS=Homo sapiens OX=9606 GN=UMOD PE=1 SV=1	4880.83	0	0	5.72986e+06	13066436	6133109	2.50956e+07	0	7.27191e+06	34490292	0	0	0	0	0	0	0	0	0
R.C[+57.02146]NTAAPM[+15.99492]WLN[+3048.08451]GTHPSSDE.G	HexNAc(6)Hex(5)Fuc(1)NeuAc(3)	223	>sp|P07911|UROM_HUMAN Uromodulin OS=Homo sapiens OX=9606 GN=UMOD PE=1 SV=1	5050.9	6030337	60013196	24152860	49165244	27685368	0	0	109149928	0	0	0	0	0	0	0	0	0	0
R.C[+57.02146]NTAAPM[+15.99492]WLN[+3517.22767]GTHPSSDE.G	HexNAc(6)Hex(7)NeuAc(4)	223	>sp|P07911|UROM_HUMAN Uromodulin OS=Homo sapiens OX=9606 GN=UMOD PE=1 SV=1	5520.04	4791963	4090378	18008314	0	0	9259846	1.22295e+06	0	0	0	0	40888896	0	0	0	0	0	0
R.C[+57.02146]NTAAPMWLN[+2141.78803]GTHPSSDEGIVSR.K	HexNAc(6)Hex(3)Fuc(1)NeuAc(1)	223	>sp|P07911|UROM_HUMAN Uromodulin OS=Homo sapiens OX=9606 GN=UMOD PE=1 SV=1	4640.92	60697760	1.58397e+08	0	6.86409e+07	1.82187e+06	0	23320410	0	0	0	0	3.90168e+06	0	0	0	0	0	0
R.C[+57.02146]NTAAPMWLN[+2157.78295]GTHPSSDEGIVSR.K	HexNAc(6)Hex(4)NeuAc(1)	223	>sp|P07911|UROM_HUMAN Uromodulin OS=Homo sapiens OX=9606 GN=UMOD PE=1 SV=1	4656.91	275367136	298221472	0	69165968	43348180	0	18248598	0	6712999	0	0	0	0	0	0	0	0	0
R.C[+57.02146]NTAAPMWLN[+2221.78776]GTHPSSDEGIVSR.K	HexNAc(4)Hex(6)Fuc(1)NeuAc(1)	223	>sp|P07911|UROM_HUMAN Uromodulin OS=Homo sapiens OX=9606 GN=UMOD PE=1 SV=1	4720.91	0	40619772	0	63248348	35290584	2.27471e+08	3.86429e+07	32149368	0	0	0	0	0	0	0	0	0	0
R.C[+57.02146]NTAAPMWLN[+2424.86713]GTHPSSDEGIVSR.K	HexNAc(5)Hex(6)Fuc(1)NeuAc(1)	223	>sp|P07911|UROM_HUMAN Uromodulin OS=Homo sapiens OX=9606 GN=UMOD PE=1 SV=1	4923.99	26174524	46385516	4.58488e+06	128383064	13788986	0	92169176	0	0	0	0	0	0	0	0	0	0	0
R.C[+57.02146]NTAAPMWLN[+2789.99933]GTHPSSDEGIVSR.K	HexNAc(6)Hex(7)Fuc(1)NeuAc(1)	223	>sp|P07911|UROM_HUMAN Uromodulin OS=Homo sapiens OX=9606 GN=UMOD PE=1 SV=1	5289.13	23264058	18251822	0	98701384	11310074	0	0	67726472	1.35153e+06	0	0	0	0	0	0	0	0	0
R.C[+57.02146]NTAAPMWLN[+3210.13734]GTHPSSDEGIVSR.K	HexNAc(6)Hex(6)Fuc(1)NeuAc(3)	223	>sp|P07911|UROM_HUMAN Uromodulin OS=Homo sapiens OX=9606 GN=UMOD PE=1 SV=1	5709.26	76161080	1.51133e+08	0	2.07309e+08	40414288	0	0	47627704	43781716	0	0	0	0	0	0	0	0	0
R.C[+57.02146]NTAAPMWLN[+3663.28558]GTHPSSDEGIVSR.K	HexNAc(6)Hex(7)Fuc(1)NeuAc(4)	223	>sp|P07911|UROM_HUMAN Uromodulin OS=Homo sapiens OX=9606 GN=UMOD PE=1 SV=1	6162.41	0	11346471	0	147229568	299691040	32745188	75942352	0	17681882	0	0	0	0	0	0	0	0	0
R.C[+57.02146]NTAAPMWLN[+3737.32236]GTHPSSDEGIVSR.K	HexNAc(7)Hex(8)Fuc(1)NeuAc(3)	223	>sp|P07911|UROM_HUMAN Uromodulin OS=Homo sapiens OX=9606 GN=UMOD PE=1 SV=1	6236.45	0	0	154065616	0	453514880	68578016	334558944	14835325	0	0	0	32618470	0	0	0	0	0	0
R.C[+57.02146]NTAAPM[+15.99492]WLN[+2188.73980]GTHPSSDEGIVSR.K	HexNAc(2)Hex(11)	223	>sp|P07911|UROM_HUMAN Uromodulin OS=Homo sapiens OX=9606 GN=UMOD PE=1 SV=1	4703.86	0	2990917888	2534915072	2832198400	0	6.61746e+07	1367328768	0	4.19313e+07	0	0	0	0	0	0	0	0	0
R.C[+57.02146]NTAAPM[+15.99492]WLN[+3081.09474]GTHPSSDEGIVSR.K	HexNAc(6)Hex(7)Fuc(1)NeuAc(2)	223	>sp|P07911|UROM_HUMAN Uromodulin OS=Homo sapiens OX=9606 GN=UMOD PE=1 SV=1	5596.22	0	1.67606e+06	5749003	2.43649e+06	7.04596e+06	10191376	0	0	8424173	0	0	0	0	0	0	0	0	0
R.C[+57.02146]NTAAPM[+15.99492]WLN[+3372.19016]GTHPSSDEGIVSR.K	HexNAc(6)Hex(7)Fuc(1)NeuAc(3)	223	>sp|P07911|UROM_HUMAN Uromodulin OS=Homo sapiens OX=9606 GN=UMOD PE=1 SV=1	5887.31	0	0	1.98582e+06	0	2.87266e+06	3203032	0	2.15232e+06	2.04994e+06	0	0	5831906	0	0	0	0	0	0
K.AC[+57.02146]AGGYYVYN[+2919.04192]LTAPPEC[+57.02146]HLAYC[+57.02146]TDPSSVE.G	HexNAc(6)Hex(6)Fuc(1)NeuAc(2)	266	>sp|P07911|UROM_HUMAN Uromodulin OS=Homo sapiens OX=9606 GN=UMOD PE=1 SV=1	6183.43	0	161482448	17993856	0	647889792	93169952	240570352	66759700	0	0	0	0	0	0	0	0	0	0
K.AC[+57.02146]AGGYYVYN[+1581.55506]LTAPPEC[+57.02146]HLAYC[+57.02146]TDPSSVEGTC[+57.02146]E.E	HexNAc(3)Hex(6)	266	>sp|P07911|UROM_HUMAN Uromodulin OS=Homo sapiens OX=9606 GN=UMOD PE=1 SV=1	5293.08	0	27723702	4.01597e+07	1.41117e+07	0	0	17070812	7.6606e+06	25748512	0	0	0	0	0	0	0	0	0
K.AC[+57.02146]AGGYYVYN[+2586.91995]LTAPPEC[+57.02146]HLAYC[+57.02146]TDPSSVEGTC[+57.02146]E.E	HexNAc(5)Hex(7)Fuc(1)NeuAc(1)	266	>sp|P07911|UROM_HUMAN Uromodulin OS=Homo sapiens OX=9606 GN=UMOD PE=1 SV=1	6298.45	70962824	0	274751968	66864100	0	33074928	16027861	77226440	0	0	0	0	0	0	0	0	0	0
K.AC[+57.02146]AGGYYVYN[+1872.65048]LTAPPE.C	HexNAc(3)Hex(6)NeuAc(1)	266	>sp|P07911|UROM_HUMAN Uromodulin OS=Homo sapiens OX=9606 GN=UMOD PE=1 SV=1	3617.43	15519039	25321632	25733942	0	26280366	9236076	17530624	0	0	0	0	0	0	0	0	0	0	0
K.AC[+57.02146]AGGYYVYN[+1704.63471]LTAPPEC[+57.02146]HLAYC[+57.02146]TDPSSVEGTC[+57.02146]E.E	HexNAc(6)Hex(3)	266	>sp|P07911|UROM_HUMAN Uromodulin OS=Homo sapiens OX=9606 GN=UMOD PE=1 SV=1	5416.16	0	3.0495e+08	0	2.50508e+08	0	1.65971e+08	0	2.54707e+08	3.37252e+08	0	0	6.44101e+07	0	0	0	0	0	0
K.QDFN[+3226.13225]ITDISLLE.H	HexNAc(6)Hex(7)NeuAc(3)	319	>sp|P07911|UROM_HUMAN Uromodulin OS=Homo sapiens OX=9606 GN=UMOD PE=1 SV=1	4632.83	2416954	1.04851e+07	2.05379e+06	7.27392e+06	0	0	0	3.35978e+06	1.12291e+06	0	0	0	0	0	0	0	0	0
K.QDFN[+3575.26953]ITDISLLE.H	HexNAc(7)Hex(7)Fuc(1)NeuAc(3)	319	>sp|P07911|UROM_HUMAN Uromodulin OS=Homo sapiens OX=9606 GN=UMOD PE=1 SV=1	4981.96	4.62827e+07	2.38628e+07	2.30614e+07	3.101e+07	0	0	0	2.7237e+07	2.36202e+07	0	0	0	0	0	0	0	0	0
K.QDFN[+4028.41777]ITDISLLEHR.L	HexNAc(7)Hex(8)Fuc(1)NeuAc(4)	319	>sp|P07911|UROM_HUMAN Uromodulin OS=Homo sapiens OX=9606 GN=UMOD PE=1 SV=1	5728.27	0	18618020	35075800	0	54727756	5661922	0	10078243	9930685	0	0	0	0	0	0	0	0	0
R.DGPC[+57.02146]GTVLTRN[+2952.05215]E.T	HexNAc(6)Hex(8)Fuc(1)NeuAc(1)	386	>sp|P07911|UROM_HUMAN Uromodulin OS=Homo sapiens OX=9606 GN=UMOD PE=1 SV=1	4269.65	1.08888e+08	9.94374e+06	0	3.33252e+07	0	0	0	0	0	0	0	6.3766e+07	0	0	1.48349e+07	3.09285e+07	0	0
R.N[+2075.72985]ETHATYSNTLYLADE.I	HexNAc(4)Hex(6)NeuAc(1)	396	>sp|P07911|UROM_HUMAN Uromodulin OS=Homo sapiens OX=9606 GN=UMOD PE=1 SV=1	3916.54	284821696	357172000	0	361501472	234465008	40554844	5.34647e+06	0	0	0	0	0	0	0	0	0	0	0
R.N[+1710.59765]ETHATYSNTLYLADE.I	HexNAc(3)Hex(5)NeuAc(1)	396	>sp|P07911|UROM_HUMAN Uromodulin OS=Homo sapiens OX=9606 GN=UMOD PE=1 SV=1	3551.41	3.68295e+07	9.45759e+07	0	0	3.84824e+07	1.57148e+07	2.02941e+07	4.35112e+07	0	0	0	0	0	0	0	0	0	0
R.N[+2116.75640]ETHATYSNTLYLADE.I	HexNAc(5)Hex(5)NeuAc(1)	396	>sp|P07911|UROM_HUMAN Uromodulin OS=Homo sapiens OX=9606 GN=UMOD PE=1 SV=1	3957.57	130249560	150303696	12087537	258548080	112607120	36661564	0	0	0	0	0	0	0	0	0	0	0	0
R.FALLMTNC[+57.02146]YATPSSN[+1216.42286]ATDPLK.Y	HexNAc(2)Hex(5)	499	>sp|P07911|UROM_HUMAN Uromodulin OS=Homo sapiens OX=9606 GN=UMOD PE=1 SV=1	3530.52	95068808	165624160	19889976	0	18661212	0	99636312	125102456	0	0	0	0	0	0	0	0	0	0
R.FALLMTNC[+57.02146]YATPSSN[+2935.03683]ATDPLK.Y	HexNAc(6)Hex(7)NeuAc(2)	499	>sp|P07911|UROM_HUMAN Uromodulin OS=Homo sapiens OX=9606 GN=UMOD PE=1 SV=1	5249.13	0	1.33646e+06	0	3.21527e+06	7.26464e+06	0	19582022	9749193	5.95284e+06	0	0	0	0	0	0	0	0	0
R.FALLM[+15.99492]TNC[+57.02146]YATPSSN[+2075.72985]ATDPLK.Y	HexNAc(4)Hex(6)NeuAc(1)	499	>sp|P07911|UROM_HUMAN Uromodulin OS=Homo sapiens OX=9606 GN=UMOD PE=1 SV=1	4405.82	24154644	0	0	0	5165445	3.72283e+06	9.38964e+06	7.77513e+06	10632865	0	0	0	0	0	0	0	0	0
R.FALLMTNC[+57.02146]YATPSSN[+1971.71889]ATDPLK.Y	HexNAc(5)Hex(5)Fuc(1)	499	>sp|P07911|UROM_HUMAN Uromodulin OS=Homo sapiens OX=9606 GN=UMOD PE=1 SV=1	4285.82	0	6.20888e+07	1.91539e+08	1.43633e+07	5.9338e+07	0	0	5.87704e+06	0	0	0	3.42622e+08	0	0	0	0	0	0
R.FALLMTNC[+57.02146]YATPSSN[+2643.94142]ATDPLK.Y	HexNAc(6)Hex(7)NeuAc(1)	499	>sp|P07911|UROM_HUMAN Uromodulin OS=Homo sapiens OX=9606 GN=UMOD PE=1 SV=1	4958.04	0	0	6.13973e+06	19930570	7133906	3.14992e+06	2.02005e+06	0	1.97453e+06	0	0	0	0	0	0	0	0	0
R.FALLMTNC[+57.02146]YATPSSN[+2952.05215]ATDPLK.Y	HexNAc(6)Hex(8)Fuc(1)NeuAc(1)	499	>sp|P07911|UROM_HUMAN Uromodulin OS=Homo sapiens OX=9606 GN=UMOD PE=1 SV=1	5266.15	53783448	0	24303640	0	35103416	31590740	0	13614315	0	0	0	1.39449e+06	0	0	0	0	0	0
R.FALLM[+15.99492]TNC[+57.02146]YATPSSN[+1809.66607]ATDPLK.Y	HexNAc(5)Hex(4)Fuc(1)	499	>sp|P07911|UROM_HUMAN Uromodulin OS=Homo sapiens OX=9606 GN=UMOD PE=1 SV=1	4139.76	0	36305512	0	39404604	0	0	12539118	23636056	2.86558e+06	0	0	17585928	0	0	0	0	0	0
R.FALLM[+15.99492]TNC[+57.02146]YATPSSN[+2262.81431]ATDPLK.Y	HexNAc(5)Hex(5)Fuc(1)NeuAc(1)	499	>sp|P07911|UROM_HUMAN Uromodulin OS=Homo sapiens OX=9606 GN=UMOD PE=1 SV=1	4592.91	4.95234e+06	0	1.38598e+06	0	9521977	9390303	9195312	0	0	0	0	3.01589e+06	0	0	0	0	0	0
R.FALLM[+15.99492]TNC[+57.02146]YATPSSN[+2756.98910]ATDPLK.Y	HexNAc(6)Hex(5)Fuc(1)NeuAc(2)	499	>sp|P07911|UROM_HUMAN Uromodulin OS=Homo sapiens OX=9606 GN=UMOD PE=1 SV=1	5087.08	89830368	2.55915e+07	0	1.10438e+07	7388059	7.1114e+07	0	0	0	0	0	3.13422e+06	0	0	0	0	0	0
E.C[+57.02146]HSN[+349.13728]ATC[+57.02146]TEDE.A	HexNAc(1)Fuc(1)	35	>sp|P07911|UROM_HUMAN Uromodulin OS=Homo sapiens OX=9606 GN=UMOD PE=1 SV=1	1671.59	3.80197e+07	1.038e+08	1.09747e+07	3.43759e+07	0	0	1.4944e+06	4.98148e+06	8.98651e+06	0	0	0	0	0	0	0	0	0
R.C[+57.02146]NTAAPM[+15.99492]WLN[+3009.07361]GTHPSSDE.G	HexNAc(7)Hex(8)NeuAc(1)	223	>sp|P07911|UROM_HUMAN Uromodulin OS=Homo sapiens OX=9606 GN=UMOD PE=1 SV=1	5011.89	150064384	9.15858e+07	84790144	139720336	152693376	0	129145336	3.74888e+08	0	0	0	0	0	0	0	0	0	0
R.C[+57.02146]NTAAPMWLN[+1954.70357]GTHPSSDE.G	HexNAc(5)Hex(4)NeuAc(1)	223	>sp|P07911|UROM_HUMAN Uromodulin OS=Homo sapiens OX=9606 GN=UMOD PE=1 SV=1	3941.52	4.0982e+09	1.67067e+09	0	869771072	564010496	57253036	0	22702142	86208184	0	0	0	0	0	0	0	0	0
R.C[+57.02146]NTAAPMWLN[+2278.80922]GTHPSSDE.G	HexNAc(5)Hex(6)NeuAc(1)	223	>sp|P07911|UROM_HUMAN Uromodulin OS=Homo sapiens OX=9606 GN=UMOD PE=1 SV=1	4265.63	0	9.84356e+07	0	5.03099e+08	1.76336e+08	2.92023e+07	0	1.08756e+08	2.10874e+08	0	0	1.99687e+07	0	0	0	0	0	0
R.C[+57.02146]NTAAPMWLN[+2586.91995]GTHPSSDE.G	HexNAc(5)Hex(7)Fuc(1)NeuAc(1)	223	>sp|P07911|UROM_HUMAN Uromodulin OS=Homo sapiens OX=9606 GN=UMOD PE=1 SV=1	4573.74	471219584	487680896	83791128	283521696	201460128	0	3.48347e+08	0	511841568	0	0	0	0	0	0	0	0	0
R.C[+57.02146]NTAAPMWLN[+2952.05215]GTHPSSDE.G	HexNAc(6)Hex(8)Fuc(1)NeuAc(1)	223	>sp|P07911|UROM_HUMAN Uromodulin OS=Homo sapiens OX=9606 GN=UMOD PE=1 SV=1	4938.87	78700232	5.72256e+07	0	1.33763e+08	3.11925e+07	0	19358306	57686260	32136786	0	0	0	0	0	0	0	0	0
R.C[+57.02146]NTAAPMWLN[+3081.09474]GTHPSSDE.G	HexNAc(6)Hex(7)Fuc(1)NeuAc(2)	223	>sp|P07911|UROM_HUMAN Uromodulin OS=Homo sapiens OX=9606 GN=UMOD PE=1 SV=1	5067.91	0	58644040	19051242	0	1.56803e+07	3.53978e+06	4.65934e+06	75427168	67321656	0	0	0	0	0	0	0	0	0
R.C[+57.02146]NTAAPMWLN[+3284.17411]GTHPSSDE.G	HexNAc(7)Hex(7)Fuc(1)NeuAc(2)	223	>sp|P07911|UROM_HUMAN Uromodulin OS=Homo sapiens OX=9606 GN=UMOD PE=1 SV=1	5270.99	0	78967600	9488934	5.26912e+07	4.96521e+07	0	1.45721e+07	3.77777e+07	0	0	0	2.47398e+06	0	0	0	0	0	0
R.C[+57.02146]NTAAPMWLN[+3575.26953]GTHPSSDE.G	HexNAc(7)Hex(7)Fuc(1)NeuAc(3)	223	>sp|P07911|UROM_HUMAN Uromodulin OS=Homo sapiens OX=9606 GN=UMOD PE=1 SV=1	5562.09	611838464	9.67207e+08	280976608	1020709952	359434880	0	0	34210024	0	0	0	21147182	0	0	0	0	0	0
R.C[+57.02146]NTAAPMWLN[+1704.63471]GTHPSSDEGIVSR.K	HexNAc(6)Hex(3)	223	>sp|P07911|UROM_HUMAN Uromodulin OS=Homo sapiens OX=9606 GN=UMOD PE=1 SV=1	4203.76	86799064	409256992	0	375268768	35921772	3.17242e+06	9166302	8170009	0	0	0	0	0	0	0	0	0	0
R.C[+57.02146]NTAAPMWLN[+1913.67702]GTHPSSDEGIVSR.K	HexNAc(4)Hex(5)NeuAc(1)	223	>sp|P07911|UROM_HUMAN Uromodulin OS=Homo sapiens OX=9606 GN=UMOD PE=1 SV=1	4412.8	0	31051986	0	37433152	1.40191e+08	1.37182e+07	1.86045e+07	0	5.15016e+06	0	0	8.36078e+07	0	0	0	0	0	0
R.C[+57.02146]NTAAPMWLN[+2059.73493]GTHPSSDEGIVSR.K	HexNAc(4)Hex(5)Fuc(1)NeuAc(1)	223	>sp|P07911|UROM_HUMAN Uromodulin OS=Homo sapiens OX=9606 GN=UMOD PE=1 SV=1	4558.86	198076960	309631328	0	277849440	58912928	5.82483e+06	238250144	43278100	0	0	0	0	0	0	0	0	0	0
R.C[+57.02146]NTAAPMWLN[+2350.79263]GTHPSSDEGIVSR.K	HexNAc(2)Hex(12)	223	>sp|P07911|UROM_HUMAN Uromodulin OS=Homo sapiens OX=9606 GN=UMOD PE=1 SV=1	4849.92	566192640	0	317798336	0	232410896	0	2.526e+08	33254588	6.52507e+07	0	0	5.4141e+07	0	0	0	0	0	0
R.C[+57.02146]NTAAPMWLN[+2627.94650]GTHPSSDEGIVSR.K	HexNAc(6)Hex(6)Fuc(1)NeuAc(1)	223	>sp|P07911|UROM_HUMAN Uromodulin OS=Homo sapiens OX=9606 GN=UMOD PE=1 SV=1	5127.07	720879552	384851424	0	1197802240	5.28083e+06	0	30170326	37672700	0	0	0	35444072	0	0	0	0	0	0
R.C[+57.02146]NTAAPMWLN[+3372.19016]GTHPSSDEGIVSR.K	HexNAc(6)Hex(7)Fuc(1)NeuAc(3)	223	>sp|P07911|UROM_HUMAN Uromodulin OS=Homo sapiens OX=9606 GN=UMOD PE=1 SV=1	5871.32	0	19382184	11993154	19893658	60328212	0	15100998	4.52695e+07	6859403	0	0	0	0	0	0	0	0	0
R.C[+57.02146]NTAAPM[+15.99492]WLN[+1913.67702]GTHPSSDEGIVSR.K	HexNAc(4)Hex(5)NeuAc(1)	223	>sp|P07911|UROM_HUMAN Uromodulin OS=Homo sapiens OX=9606 GN=UMOD PE=1 SV=1	4428.8	23017934	13128548	0	31061056	11096680	28538462	0	0	0	0	0	250359296	0	0	1.09435e+06	0	0	0
R.C[+57.02146]NTAAPM[+15.99492]WLN[+2059.73493]GTHPSSDEGIVSR.K	HexNAc(4)Hex(5)Fuc(1)NeuAc(1)	223	>sp|P07911|UROM_HUMAN Uromodulin OS=Homo sapiens OX=9606 GN=UMOD PE=1 SV=1	4574.86	10415412	9585138	0	34236016	20326682	2.19529e+07	4.05523e+06	0	4.38991e+06	0	0	0	0	0	0	0	0	0
R.C[+57.02146]NTAAPM[+15.99492]WLN[+2407.85181]GTHPSSDEGIVSR.K	HexNAc(5)Hex(5)NeuAc(2)	223	>sp|P07911|UROM_HUMAN Uromodulin OS=Homo sapiens OX=9606 GN=UMOD PE=1 SV=1	4922.97	27036678	4.24585e+06	0	0	2.26669e+06	2.13027e+07	7.45134e+06	4.31926e+06	0	0	0	1.13758e+07	0	0	0	0	0	0
R.C[+57.02146]NTAAPM[+15.99492]WLN[+2772.98401]GTHPSSDEGIVSR.K	HexNAc(6)Hex(6)NeuAc(2)	223	>sp|P07911|UROM_HUMAN Uromodulin OS=Homo sapiens OX=9606 GN=UMOD PE=1 SV=1	5288.11	7505619	28111784	0	5.6132e+07	1.90234e+06	364007	3.84463e+06	0	0	0	0	8.15228e+06	0	0	0	0	0	0
R.C[+57.02146]NTAAPM[+15.99492]WLN[+2935.03683]GTHPSSDEGIVSR.K	HexNAc(6)Hex(7)NeuAc(2)	223	>sp|P07911|UROM_HUMAN Uromodulin OS=Homo sapiens OX=9606 GN=UMOD PE=1 SV=1	5450.16	5683777	22385058	1.16522e+06	37267936	7.38957e+06	0	0	17572974	0	0	0	9537842	0	0	0	0	0	0
R.C[+57.02146]NTAAPM[+15.99492]WLN[+3007.05796]GTHPSSDEGIVSR.K	HexNAc(5)Hex(6)Fuc(1)NeuAc(3)	223	>sp|P07911|UROM_HUMAN Uromodulin OS=Homo sapiens OX=9606 GN=UMOD PE=1 SV=1	5522.18	5708854	0	8705831	26337566	1.61585e+07	8663916	4.80013e+07	0	0	0	0	6.31347e+06	0	0	0	0	0	0
R.C[+57.02146]NTAAPM[+15.99492]WLN[+3048.08451]GTHPSSDEGIVSR.K	HexNAc(6)Hex(5)Fuc(1)NeuAc(3)	223	>sp|P07911|UROM_HUMAN Uromodulin OS=Homo sapiens OX=9606 GN=UMOD PE=1 SV=1	5563.21	43404684	148479616	1.32821e+06	216741712	74921304	0	27564226	20974708	0	0	0	0	0	0	0	0	0	0
R.C[+57.02146]NTAAPM[+15.99492]WLN[+3517.22767]GTHPSSDEGIVSR.K	HexNAc(6)Hex(7)NeuAc(4)	223	>sp|P07911|UROM_HUMAN Uromodulin OS=Homo sapiens OX=9606 GN=UMOD PE=1 SV=1	6032.35	0	2.0747e+06	129250488	0	56991444	52835628	102633696	60613004	0	0	0	88177544	0	0	0	0	0	0
K.AC[+57.02146]AGGYYVYN[+2133.77171]LTAPPEC[+57.02146]HLAYC[+57.02146]TDPSSVE.G	HexNAc(5)Hex(6)Fuc(1)	266	>sp|P07911|UROM_HUMAN Uromodulin OS=Homo sapiens OX=9606 GN=UMOD PE=1 SV=1	5398.16	268655040	186968480	156730976	575630720	181945088	0	0	1.42268e+08	251931648	0	0	0	0	0	0	0	0	0
K.AC[+57.02146]AGGYYVYN[+2352.84600]LTAPPEC[+57.02146]HLAYC[+57.02146]TDPSSVEGTC[+57.02146]E.E	HexNAc(6)Hex(7)	266	>sp|P07911|UROM_HUMAN Uromodulin OS=Homo sapiens OX=9606 GN=UMOD PE=1 SV=1	6064.37	0	187462672	230174720	374146976	194586704	0	131620136	243221920	219529648	0	0	0	0	0	0	0	0	0
K.AC[+57.02146]AGGYYVYN[+1565.56014]LTAPPE.C	HexNAc(3)Hex(5)Fuc(1)	266	>sp|P07911|UROM_HUMAN Uromodulin OS=Homo sapiens OX=9606 GN=UMOD PE=1 SV=1	3310.34	31121026	0	0	0	25497550	15000576	26515912	17872722	2.34334e+07	0	0	5.7538e+06	0	0	0	0	0	0
K.QDFN[+3210.13734]ITDISLLE.H	HexNAc(6)Hex(6)Fuc(1)NeuAc(3)	319	>sp|P07911|UROM_HUMAN Uromodulin OS=Homo sapiens OX=9606 GN=UMOD PE=1 SV=1	4616.83	18526918	9304939	4.405e+06	0	3.69611e+06	0	2207989	27132982	13857045	0	0	0	0	0	0	0	0	0
R.DGPC[+57.02146]GTVLTRN[+2133.77171]E.T	HexNAc(5)Hex(6)Fuc(1)	386	>sp|P07911|UROM_HUMAN Uromodulin OS=Homo sapiens OX=9606 GN=UMOD PE=1 SV=1	3451.37	109613568	0	0	35049896	112367344	0	0	0	49321544	0	0	8.34676e+06	0	0	17047648	4.13579e+06	0	0
R.DGPC[+57.02146]GTVLTRN[+2586.91995]E.T	HexNAc(5)Hex(7)Fuc(1)NeuAc(1)	386	>sp|P07911|UROM_HUMAN Uromodulin OS=Homo sapiens OX=9606 GN=UMOD PE=1 SV=1	3904.52	1.61103e+08	0	0	7.38501e+07	1.77958e+08	8.58658e+07	0	0	0	0	0	0	0	9.71311e+06	1.56817e+08	1.41032e+08	0	0
R.N[+2553.90972]ETHATYSNTLYLADE.I	HexNAc(5)Hex(5)Fuc(1)NeuAc(2)	396	>sp|P07911|UROM_HUMAN Uromodulin OS=Homo sapiens OX=9606 GN=UMOD PE=1 SV=1	4394.72	2.7157e+08	1.576e+08	1.9364e+08	4.35031e+08	2.62773e+08	0	2.39933e+08	0	0	0	0	1.40626e+07	0	0	0	0	0	0
R.N[+1548.54483]ETHATYSNTLYLADE.I	HexNAc(3)Hex(4)NeuAc(1)	396	>sp|P07911|UROM_HUMAN Uromodulin OS=Homo sapiens OX=9606 GN=UMOD PE=1 SV=1	3389.36	6.66736e+07	3.81987e+07	0	4.73636e+07	3.28158e+07	8.3956e+06	1.51423e+07	4.06183e+07	0	0	0	0	0	0	0	0	0	0
R.N[+2919.04192]ETHATYSNTLYLADE.I	HexNAc(6)Hex(6)Fuc(1)NeuAc(2)	396	>sp|P07911|UROM_HUMAN Uromodulin OS=Homo sapiens OX=9606 GN=UMOD PE=1 SV=1	4759.85	2.12301e+08	5.82655e+07	0	2.75544e+08	1.74995e+08	0	1.05509e+08	4.92821e+07	6.12524e+07	0	0	0	0	0	0	0	0	0
R.FALLMTNC[+57.02146]YATPSSN[+2157.78295]ATDPLK.Y	HexNAc(6)Hex(4)NeuAc(1)	499	>sp|P07911|UROM_HUMAN Uromodulin OS=Homo sapiens OX=9606 GN=UMOD PE=1 SV=1	4471.88	3.96982e+08	1.80537e+08	74840144	128440720	12460569	0	67783512	70914240	0	0	0	0	0	0	0	0	0	0
R.FALLMTNC[+57.02146]YATPSSN[+3372.19016]ATDPLK.Y	HexNAc(6)Hex(7)Fuc(1)NeuAc(3)	499	>sp|P07911|UROM_HUMAN Uromodulin OS=Homo sapiens OX=9606 GN=UMOD PE=1 SV=1	5686.29	11199995	41379576	19891116	91718552	13425461	0	0	46934408	45890184	0	0	0	0	0	0	0	0	0
R.FALLM[+15.99492]TNC[+57.02146]YATPSSN[+2717.97820]ATDPLK.Y	HexNAc(7)Hex(8)	499	>sp|P07911|UROM_HUMAN Uromodulin OS=Homo sapiens OX=9606 GN=UMOD PE=1 SV=1	5048.07	3121138944	0	1879139712	1.96344e+09	2929506816	1122195456	0	1.70838e+09	0	0	0	713539520	0	0	0	0	0	0
R.FALLMTNC[+57.02146]YATPSSN[+1954.70357]ATDPLK.Y	HexNAc(5)Hex(4)NeuAc(1)	499	>sp|P07911|UROM_HUMAN Uromodulin OS=Homo sapiens OX=9606 GN=UMOD PE=1 SV=1	4268.8	0	1.84452e+06	4.45911e+08	0	111806352	34054392	2.59212e+07	0	92841632	0	0	704619776	0	0	0	0	0	0
R.FALLMTNC[+57.02146]YATPSSN[+2092.74516]ATDPLK.Y	HexNAc(4)Hex(7)Fuc(1)	499	>sp|P07911|UROM_HUMAN Uromodulin OS=Homo sapiens OX=9606 GN=UMOD PE=1 SV=1	4406.84	27073510	23019240	0	11773766	61116048	63694308	0	58290888	3.76944e+06	0	0	0	0	0	0	0	0	0
R.FALLMTNC[+57.02146]YATPSSN[+2627.94650]ATDPLK.Y	HexNAc(6)Hex(6)Fuc(1)NeuAc(1)	499	>sp|P07911|UROM_HUMAN Uromodulin OS=Homo sapiens OX=9606 GN=UMOD PE=1 SV=1	4942.04	23599078	0	3274812	38446656	98911920	3259262	0	19457272	23113336	0	0	0	0	0	0	0	0	0
R.FALLM[+15.99492]TNC[+57.02146]YATPSSN[+3210.13734]ATDPLK.Y	HexNAc(6)Hex(6)Fuc(1)NeuAc(3)	499	>sp|P07911|UROM_HUMAN Uromodulin OS=Homo sapiens OX=9606 GN=UMOD PE=1 SV=1	5540.23	8.06308e+07	0	6.89042e+07	0	5.54703e+07	5.14655e+07	2.86075e+07	0	10881416	0	0	5.41612e+07	0	0	0	0	0	0
E.C[+57.02146]HSN[+3663.28558]ATC[+57.02146]TE.D	HexNAc(6)Hex(7)Fuc(1)NeuAc(4)	35	>sp|P07911|UROM_HUMAN Uromodulin OS=Homo sapiens OX=9606 GN=UMOD PE=1 SV=1	4741.67	2.92703e+07	2.34445e+07	4.98158e+06	53036800	0	3643681	1.06937e+06	0	7751799	0	0	0	0	0	0	1.09436e+06	0	0
E.C[+57.02146]HSN[+3663.28558]ATC[+57.02146]TEDE.A	HexNAc(6)Hex(7)Fuc(1)NeuAc(4)	35	>sp|P07911|UROM_HUMAN Uromodulin OS=Homo sapiens OX=9606 GN=UMOD PE=1 SV=1	4985.74	20880500	3.7997e+06	0	8.85038e+07	0	13340527	2.04631e+07	4.80735e+07	1.32569e+07	0	0	0	0	0	0	2.53645e+06	0	0
R.C[+57.02146]NTAAPM[+15.99492]WLN[+3663.28558]GTHPSSDEGIVSR.K	HexNAc(6)Hex(7)Fuc(1)NeuAc(4)	223	>sp|P07911|UROM_HUMAN Uromodulin OS=Homo sapiens OX=9606 GN=UMOD PE=1 SV=1	6178.41	0	178301920	231014864	0	217163072	8.13421e+06	209620096	25140398	151681232	0	0	7579360	0	0	0	0	0	0
R.C[+57.02146]NTAAPMWLN[+2627.94650]GTHPSSDE.G	HexNAc(6)Hex(6)Fuc(1)NeuAc(1)	223	>sp|P07911|UROM_HUMAN Uromodulin OS=Homo sapiens OX=9606 GN=UMOD PE=1 SV=1	4614.77	879524992	1337965056	34154260	248583520	1275902720	0	49523932	0	581600512	0	0	315131904	0	0	0	0	0	0
R.C[+57.02146]NTAAPMWLN[+2789.99933]GTHPSSDE.G	HexNAc(6)Hex(7)Fuc(1)NeuAc(1)	223	>sp|P07911|UROM_HUMAN Uromodulin OS=Homo sapiens OX=9606 GN=UMOD PE=1 SV=1	4776.82	15488223	998161920	0	23300400	519818592	0	2.95905e+08	559619392	370206656	0	0	184719680	0	0	0	0	0	0
R.C[+57.02146]NTAAPM[+15.99492]WLN[+2237.78267]GTHPSSDE.G	HexNAc(4)Hex(7)NeuAc(1)	223	>sp|P07911|UROM_HUMAN Uromodulin OS=Homo sapiens OX=9606 GN=UMOD PE=1 SV=1	4240.6	16354028	640457408	2.56679e+06	55931892	0	14742184	27131314	645261440	492864512	0	0	0	0	0	0	0	0	0
R.C[+57.02146]NTAAPM[+15.99492]WLN[+2861.00005]GTHPSSDE.G	HexNAc(5)Hex(6)NeuAc(3)	223	>sp|P07911|UROM_HUMAN Uromodulin OS=Homo sapiens OX=9606 GN=UMOD PE=1 SV=1	4863.82	0	0	4.80861e+06	18892630	1.27068e+06	3.77969e+07	2.59365e+06	10336899	4.57244e+06	0	0	5.27077e+06	0	0	0	0	0	0
R.C[+57.02146]NTAAPMWLN[+2116.75640]GTHPSSDEGIVSR.K	HexNAc(5)Hex(5)NeuAc(1)	223	>sp|P07911|UROM_HUMAN Uromodulin OS=Homo sapiens OX=9606 GN=UMOD PE=1 SV=1	4615.88	200462448	184718032	0	19866076	54492124	0	18168252	9317571	6276177	0	0	1.68315e+06	0	0	0	0	0	0
R.C[+57.02146]NTAAPMWLN[+2237.78267]GTHPSSDEGIVSR.K	HexNAc(4)Hex(7)NeuAc(1)	223	>sp|P07911|UROM_HUMAN Uromodulin OS=Homo sapiens OX=9606 GN=UMOD PE=1 SV=1	4736.91	106680768	81398288	3.51103e+06	2.51886e+08	0	5.72358e+07	7.31926e+07	25778840	0	0	0	19260760	0	0	0	0	0	0
R.C[+57.02146]NTAAPMWLN[+2643.94142]GTHPSSDEGIVSR.K	HexNAc(6)Hex(7)NeuAc(1)	223	>sp|P07911|UROM_HUMAN Uromodulin OS=Homo sapiens OX=9606 GN=UMOD PE=1 SV=1	5143.07	39703608	105813176	10032117	150966208	30131410	0	79479864	22381288	0	0	0	15839262	0	0	0	0	0	0
R.C[+57.02146]NTAAPMWLN[+2772.98401]GTHPSSDEGIVSR.K	HexNAc(6)Hex(6)NeuAc(2)	223	>sp|P07911|UROM_HUMAN Uromodulin OS=Homo sapiens OX=9606 GN=UMOD PE=1 SV=1	5272.11	61946612	83253608	0	277202016	40200580	2916190	39641220	85644704	6795419	0	0	0	0	0	0	0	0	0
R.C[+57.02146]NTAAPMWLN[+2919.04192]GTHPSSDEGIVSR.K	HexNAc(6)Hex(6)Fuc(1)NeuAc(2)	223	>sp|P07911|UROM_HUMAN Uromodulin OS=Homo sapiens OX=9606 GN=UMOD PE=1 SV=1	5418.17	1647172864	1556693760	94125280	2155498752	380453152	144801376	18595100	18872640	0	0	0	0	0	0	0	0	0	0
R.C[+57.02146]NTAAPMWLN[+2952.05215]GTHPSSDEGIVSR.K	HexNAc(6)Hex(8)Fuc(1)NeuAc(1)	223	>sp|P07911|UROM_HUMAN Uromodulin OS=Homo sapiens OX=9606 GN=UMOD PE=1 SV=1	5451.18	5.41642e+07	150779776	14184842	282342144	67354904	0	96957608	209371584	0	0	0	17575538	0	0	0	0	0	0
R.C[+57.02146]NTAAPM[+15.99492]WLN[+2237.78267]GTHPSSDEGIVSR.K	HexNAc(4)Hex(7)NeuAc(1)	223	>sp|P07911|UROM_HUMAN Uromodulin OS=Homo sapiens OX=9606 GN=UMOD PE=1 SV=1	4752.9	4.7339e+06	3.33832e+06	1.41285e+06	2.88716e+06	387309	11911391	3.10627e+06	0	0	0	0	0	0	0	11483710	0	0	0
R.C[+57.02146]NTAAPM[+15.99492]WLN[+3284.17411]GTHPSSDEGIVSR.K	HexNAc(7)Hex(7)Fuc(1)NeuAc(2)	223	>sp|P07911|UROM_HUMAN Uromodulin OS=Homo sapiens OX=9606 GN=UMOD PE=1 SV=1	5799.3	1.39083e+06	20772508	14997571	1.75547e+07	2.78312e+06	11709026	8589641	0	0	0	0	3.75894e+07	0	0	0	0	0	0
K.AC[+57.02146]AGGYYVYN[+203.07937]LTAPPE.C	HexNAc(1)	266	>sp|P07911|UROM_HUMAN Uromodulin OS=Homo sapiens OX=9606 GN=UMOD PE=1 SV=1	1947.86	1.67896e+08	1.07331e+08	0	2.03687e+08	0	8.21804e+07	6.25772e+07	5.96439e+07	3.93021e+07	0	0	6.4249e+07	0	0	0	0	0	0
K.AC[+57.02146]AGGYYVYN[+3432.24767]LTAPPEC[+57.02146]HLAYC[+57.02146]TDPSSVE.G	HexNAc(9)Hex(9)Fuc(1)	266	>sp|P07911|UROM_HUMAN Uromodulin OS=Homo sapiens OX=9606 GN=UMOD PE=1 SV=1	6696.63	4.88523e+08	2.08228e+08	6.28176e+08	8.6265e+07	2.23682e+08	0	1.75245e+08	1.70866e+08	3.89212e+06	0	0	0	0	0	0	0	0	0
K.AC[+57.02146]AGGYYVYN[+1971.71889]LTAPPEC[+57.02146]HLAYC[+57.02146]TDPSSVE.G	HexNAc(5)Hex(5)Fuc(1)	266	>sp|P07911|UROM_HUMAN Uromodulin OS=Homo sapiens OX=9606 GN=UMOD PE=1 SV=1	5236.1	862309824	2479962624	950106816	1.5074e+09	0	314731232	550798656	946570624	1426042496	0	0	0	0	0	0	0	0	0
K.AC[+57.02146]AGGYYVYN[+1987.71380]LTAPPEC[+57.02146]HLAYC[+57.02146]TDPSSVE.G	HexNAc(5)Hex(6)	266	>sp|P07911|UROM_HUMAN Uromodulin OS=Homo sapiens OX=9606 GN=UMOD PE=1 SV=1	5252.1	2.93187e+08	1.30434e+08	2.06424e+08	17120758	28675320	0	8278514	32311512	15838042	0	0	0	0	0	0	0	0	0
K.QDFN[+3007.05796]ITDISLLE.H	HexNAc(5)Hex(6)Fuc(1)NeuAc(3)	319	>sp|P07911|UROM_HUMAN Uromodulin OS=Homo sapiens OX=9606 GN=UMOD PE=1 SV=1	4413.75	44310688	40094736	33253960	24078102	19380288	673687	0	60100204	36872064	0	0	0	0	0	0	0	0	0
R.DGPC[+57.02146]GTVLTRN[+1403.50732]E.T	HexNAc(3)Hex(4)Fuc(1)	386	>sp|P07911|UROM_HUMAN Uromodulin OS=Homo sapiens OX=9606 GN=UMOD PE=1 SV=1	2721.11	2.31948e+07	1.97219e+07	0	1.68136e+07	1.79505e+07	1.73726e+07	6.8438e+06	0	1.96147e+07	0	0	0	0	0	2.56912e+07	0	0	0
R.DGPC[+57.02146]GTVLTRN[+2756.98910]E.T	HexNAc(6)Hex(5)Fuc(1)NeuAc(2)	386	>sp|P07911|UROM_HUMAN Uromodulin OS=Homo sapiens OX=9606 GN=UMOD PE=1 SV=1	4074.59	0	1.27571e+07	6.62161e+06	6.21296e+07	9.71392e+07	2.53058e+07	2.51938e+07	0	0	0	0	0	0	0	2.08482e+07	8.84647e+06	0	0
R.DGPC[+57.02146]GTVLTRN[+2772.98401]E.T	HexNAc(6)Hex(6)NeuAc(2)	386	>sp|P07911|UROM_HUMAN Uromodulin OS=Homo sapiens OX=9606 GN=UMOD PE=1 SV=1	4090.58	0	26115882	0	11263293	28192876	0	9567670	0	15265003	0	0	7.08584e+06	0	0	1.03011e+08	5.79321e+07	0	0
R.DGPC[+57.02146]GTVLTRN[+3210.13734]E.T	HexNAc(6)Hex(6)Fuc(1)NeuAc(3)	386	>sp|P07911|UROM_HUMAN Uromodulin OS=Homo sapiens OX=9606 GN=UMOD PE=1 SV=1	4527.74	117647400	0	3.9467e+06	6.22692e+07	1.22099e+08	23743614	0	0	40872168	0	0	15992918	0	0	18513630	0	0	0
R.N[+2262.81431]ETHATYSNTLYLADE.I	HexNAc(5)Hex(5)Fuc(1)NeuAc(1)	396	>sp|P07911|UROM_HUMAN Uromodulin OS=Homo sapiens OX=9606 GN=UMOD PE=1 SV=1	4103.63	140771936	147337376	13685113	158377648	274290	17777520	0	37586056	54092064	0	0	0	0	0	0	0	0	0
R.N[+1768.63952]ETHATYSNTLYLADE.I	HexNAc(4)Hex(5)Fuc(1)	396	>sp|P07911|UROM_HUMAN Uromodulin OS=Homo sapiens OX=9606 GN=UMOD PE=1 SV=1	3609.45	176441776	201192192	0	183499296	114626624	26066780	28784018	50923120	68638848	0	0	0	0	0	0	0	0	0
R.N[+2424.86713]ETHATYSNTLYLADE.I	HexNAc(5)Hex(6)Fuc(1)NeuAc(1)	396	>sp|P07911|UROM_HUMAN Uromodulin OS=Homo sapiens OX=9606 GN=UMOD PE=1 SV=1	4265.68	259018816	506733248	114769568	575966848	217196960	0	168137968	201321152	189819664	0	0	0	0	0	0	0	0	0
R.N[+3081.09474]ETHATYSNTLYLADE.I	HexNAc(6)Hex(7)Fuc(1)NeuAc(2)	396	>sp|P07911|UROM_HUMAN Uromodulin OS=Homo sapiens OX=9606 GN=UMOD PE=1 SV=1	4921.91	0	1.05698e+08	2.84599e+08	4.36345e+08	2.90981e+08	3.92366e+07	1.36425e+08	2.48431e+07	5.02205e+07	0	0	0	0	0	0	0	0	0
R.N[+2407.85181]ETHATYSNTLYLADE.I	HexNAc(5)Hex(5)NeuAc(2)	396	>sp|P07911|UROM_HUMAN Uromodulin OS=Homo sapiens OX=9606 GN=UMOD PE=1 SV=1	4248.66	2.55691e+08	2.35848e+08	2.55794e+08	5.85943e+08	2.34082e+08	0	2.00075e+08	1.29538e+08	0	0	0	7.12494e+06	0	0	0	0	0	0
R.FALLMTNC[+57.02146]YATPSSN[+2481.88859]ATDPLK.Y	HexNAc(6)Hex(6)NeuAc(1)	499	>sp|P07911|UROM_HUMAN Uromodulin OS=Homo sapiens OX=9606 GN=UMOD PE=1 SV=1	4795.99	295273632	1.47078e+08	1.09511e+08	3.16253e+08	39063428	0	2.20123e+08	2.64346e+08	5.20214e+06	0	0	0	0	0	0	0	0	0
R.FALLMTNC[+57.02146]YATPSSN[+2262.81431]ATDPLK.Y	HexNAc(5)Hex(5)Fuc(1)NeuAc(1)	499	>sp|P07911|UROM_HUMAN Uromodulin OS=Homo sapiens OX=9606 GN=UMOD PE=1 SV=1	4576.91	42427480	0	91016760	1.20954e+08	1.77264e+08	1.908e+07	1.26181e+08	87147320	59712612	0	0	0	0	0	0	0	0	0
R.FALLMTNC[+57.02146]YATPSSN[+2457.87736]ATDPLK.Y	HexNAc(5)Hex(8)Fuc(1)	499	>sp|P07911|UROM_HUMAN Uromodulin OS=Homo sapiens OX=9606 GN=UMOD PE=1 SV=1	4771.97	27420216	0	10655063	27678252	83855288	67249824	0	55271500	30245270	0	0	216160832	0	0	0	0	0	0
R.FALLMTNC[+57.02146]YATPSSN[+2569.90464]ATDPLK.Y	HexNAc(5)Hex(6)NeuAc(2)	499	>sp|P07911|UROM_HUMAN Uromodulin OS=Homo sapiens OX=9606 GN=UMOD PE=1 SV=1	4884	29200006	0	9.58191e+07	6585931	2.96445e+07	5.14488e+06	2.12501e+07	5.70381e+07	2.57812e+07	0	0	0	0	0	0	0	0	0
R.FALLMTNC[+57.02146]YATPSSN[+3446.22694]ATDPLK.Y	HexNAc(7)Hex(8)Fuc(1)NeuAc(2)	499	>sp|P07911|UROM_HUMAN Uromodulin OS=Homo sapiens OX=9606 GN=UMOD PE=1 SV=1	5760.32	2512319	2.20815e+06	4.52351e+06	0	35193168	29426420	0	33169564	9831421	0	0	15630387	0	0	0	0	0	0
R.FALLM[+15.99492]TNC[+57.02146]YATPSSN[+1850.69261]ATDPLK.Y	HexNAc(6)Hex(3)Fuc(1)	499	>sp|P07911|UROM_HUMAN Uromodulin OS=Homo sapiens OX=9606 GN=UMOD PE=1 SV=1	4180.78	35746132	7.47357e+07	8347487	119943384	0	861138	35385092	38502592	0	0	0	7157008	0	0	0	0	0	0
R.FALLM[+15.99492]TNC[+57.02146]YATPSSN[+2352.84600]ATDPLK.Y	HexNAc(6)Hex(7)	499	>sp|P07911|UROM_HUMAN Uromodulin OS=Homo sapiens OX=9606 GN=UMOD PE=1 SV=1	4682.94	1678223616	633217472	728464896	5.72787e+08	916139968	291025376	1116375808	1283057664	0	0	0	0	0	0	0	0	0	0
R.FALLM[+15.99492]TNC[+57.02146]YATPSSN[+3009.07361]ATDPLK.Y	HexNAc(7)Hex(8)NeuAc(1)	499	>sp|P07911|UROM_HUMAN Uromodulin OS=Homo sapiens OX=9606 GN=UMOD PE=1 SV=1	5339.17	117948408	12098098	78137504	577854464	2.38792e+07	7.50065e+06	0	179510592	293964448	0	0	0	0	0	0	0	0	0
R.FALLM[+15.99492]TNC[+57.02146]YATPSSN[+3081.09474]ATDPLK.Y	HexNAc(6)Hex(7)Fuc(1)NeuAc(2)	499	>sp|P07911|UROM_HUMAN Uromodulin OS=Homo sapiens OX=9606 GN=UMOD PE=1 SV=1	5411.19	16138890	5.61421e+06	5.01381e+06	0	1.7131e+06	11159837	7568887	4.93827e+06	0	0	0	24362682	0	0	0	0	0	0
E.C[+57.02146]HSN[+3663.28558]ATC[+57.02146]TEDEAVTTC[+57.02146]TC[+57.02146]QE.G	HexNAc(6)Hex(7)Fuc(1)NeuAc(4)	35	>sp|P07911|UROM_HUMAN Uromodulin OS=Homo sapiens OX=9606 GN=UMOD PE=1 SV=1	6036.15	2.83174e+08	3.10132e+07	3.53359e+07	8.62522e+07	2.24893e+08	6.5997e+07	5.76056e+07	0	0	0	0	7.51071e+07	0	0	2.85304e+07	0	0	0
R.C[+57.02146]NTAAPMWLN[+2221.78776]GTHPSSDE.G	HexNAc(4)Hex(6)Fuc(1)NeuAc(1)	223	>sp|P07911|UROM_HUMAN Uromodulin OS=Homo sapiens OX=9606 GN=UMOD PE=1 SV=1	4208.61	218274192	222818688	77737448	269055648	85050056	14909334	121603520	336080128	0	0	0	6139905	0	0	0	0	0	0
R.C[+57.02146]NTAAPMWLN[+2262.81431]GTHPSSDE.G	HexNAc(5)Hex(5)Fuc(1)NeuAc(1)	223	>sp|P07911|UROM_HUMAN Uromodulin OS=Homo sapiens OX=9606 GN=UMOD PE=1 SV=1	4249.63	1065006784	718397248	913156224	1632731264	402312640	192888608	841981952	0	392296480	0	0	66873712	0	0	0	0	0	0
R.C[+57.02146]NTAAPMWLN[+2861.00005]GTHPSSDE.G	HexNAc(5)Hex(6)NeuAc(3)	223	>sp|P07911|UROM_HUMAN Uromodulin OS=Homo sapiens OX=9606 GN=UMOD PE=1 SV=1	4847.82	75012472	399586432	133069456	456531808	119417432	27726216	102263344	292098944	68691264	0	0	0	0	0	0	0	0	0
R.C[+57.02146]NTAAPMWLN[+2878.01537]GTHPSSDE.G	HexNAc(5)Hex(7)Fuc(1)NeuAc(2)	223	>sp|P07911|UROM_HUMAN Uromodulin OS=Homo sapiens OX=9606 GN=UMOD PE=1 SV=1	4864.84	0	212527152	150107856	392861472	83730984	41305776	107970720	93792136	135641744	0	0	68478144	0	0	0	0	0	0
R.C[+57.02146]NTAAPMWLN[+2919.04192]GTHPSSDE.G	HexNAc(6)Hex(6)Fuc(1)NeuAc(2)	223	>sp|P07911|UROM_HUMAN Uromodulin OS=Homo sapiens OX=9606 GN=UMOD PE=1 SV=1	4905.86	848840576	278245056	332590816	1886906112	316034560	81110496	167441552	176911360	127977528	0	0	0	0	0	0	0	0	0
R.C[+57.02146]NTAAPMWLN[+3007.05796]GTHPSSDE.G	HexNAc(5)Hex(6)Fuc(1)NeuAc(3)	223	>sp|P07911|UROM_HUMAN Uromodulin OS=Homo sapiens OX=9606 GN=UMOD PE=1 SV=1	4993.88	1.24761e+08	1.62406e+08	51212248	123716216	5.89767e+07	1.97786e+07	7.54383e+07	1.02733e+08	6.00603e+07	0	0	0	0	0	0	0	0	0
R.C[+57.02146]NTAAPM[+15.99492]WLN[+1913.67702]GTHPSSDE.G	HexNAc(4)Hex(5)NeuAc(1)	223	>sp|P07911|UROM_HUMAN Uromodulin OS=Homo sapiens OX=9606 GN=UMOD PE=1 SV=1	3916.49	32407306	0	0	72105208	36110076	40625024	14498863	15539769	7.66696e+06	0	0	70478184	0	0	4.13023e+06	0	0	0
R.C[+57.02146]NTAAPM[+15.99492]WLN[+2350.83035]GTHPSSDE.G	HexNAc(4)Hex(5)Fuc(1)NeuAc(2)	223	>sp|P07911|UROM_HUMAN Uromodulin OS=Homo sapiens OX=9606 GN=UMOD PE=1 SV=1	4353.65	9233786	11367822	2.64912e+06	56087580	46385228	66111712	0	32271426	59258560	0	0	0	0	0	3342738	0	0	0
R.C[+57.02146]NTAAPMWLN[+2188.73980]GTHPSSDEGIVSR.K	HexNAc(2)Hex(11)	223	>sp|P07911|UROM_HUMAN Uromodulin OS=Homo sapiens OX=9606 GN=UMOD PE=1 SV=1	4687.87	2.20797e+08	8.12597e+09	4.91497e+09	1.9668e+08	4574613504	108840208	3700673280	2.42189e+08	5.22752e+09	0	0	0	0	0	0	0	0	0
R.C[+57.02146]NTAAPMWLN[+2262.81431]GTHPSSDEGIVSR.K	HexNAc(5)Hex(5)Fuc(1)NeuAc(1)	223	>sp|P07911|UROM_HUMAN Uromodulin OS=Homo sapiens OX=9606 GN=UMOD PE=1 SV=1	4761.94	1831655040	1626657792	59529584	1965722112	156956672	171877840	43343612	156697584	15159726	0	0	0	0	0	0	0	0	0
R.C[+57.02146]NTAAPMWLN[+2586.91995]GTHPSSDEGIVSR.K	HexNAc(5)Hex(7)Fuc(1)NeuAc(1)	223	>sp|P07911|UROM_HUMAN Uromodulin OS=Homo sapiens OX=9606 GN=UMOD PE=1 SV=1	5086.05	77440000	303889920	0	337212576	20801644	2.39564e+06	35742192	177367552	5.37794e+06	0	0	1.21062e+06	0	0	0	0	0	0
R.C[+57.02146]NTAAPMWLN[+2715.96255]GTHPSSDEGIVSR.K	HexNAc(5)Hex(6)Fuc(1)NeuAc(2)	223	>sp|P07911|UROM_HUMAN Uromodulin OS=Homo sapiens OX=9606 GN=UMOD PE=1 SV=1	5215.09	91555240	136111632	2.53165e+06	219656464	39014416	6.75053e+06	52421024	89955008	14970853	0	0	0	0	0	0	0	0	0
R.C[+57.02146]NTAAPMWLN[+2861.00005]GTHPSSDEGIVSR.K	HexNAc(5)Hex(6)NeuAc(3)	223	>sp|P07911|UROM_HUMAN Uromodulin OS=Homo sapiens OX=9606 GN=UMOD PE=1 SV=1	5360.13	129896616	261222448	123534720	291203872	59547476	44162428	144703920	305112992	0	0	0	17486284	0	0	0	0	0	0
R.C[+57.02146]NTAAPMWLN[+2878.01537]GTHPSSDEGIVSR.K	HexNAc(5)Hex(7)Fuc(1)NeuAc(2)	223	>sp|P07911|UROM_HUMAN Uromodulin OS=Homo sapiens OX=9606 GN=UMOD PE=1 SV=1	5377.14	17239962	55815452	37990564	46248548	49704304	6985700	37642764	32210410	0	0	0	7.91625e+07	0	0	0	0	0	0
R.C[+57.02146]NTAAPMWLN[+3007.05796]GTHPSSDEGIVSR.K	HexNAc(5)Hex(6)Fuc(1)NeuAc(3)	223	>sp|P07911|UROM_HUMAN Uromodulin OS=Homo sapiens OX=9606 GN=UMOD PE=1 SV=1	5506.19	13636244	3.78866e+07	6.40882e+07	35692208	1.06098e+08	2.83885e+07	2.43579e+07	3.97099e+07	0	0	0	1.17258e+06	0	0	0	0	0	0
R.C[+57.02146]NTAAPMWLN[+3081.09474]GTHPSSDEGIVSR.K	HexNAc(6)Hex(7)Fuc(1)NeuAc(2)	223	>sp|P07911|UROM_HUMAN Uromodulin OS=Homo sapiens OX=9606 GN=UMOD PE=1 SV=1	5580.22	6064219	8.30691e+07	14191137	1.50199e+08	2.96563e+07	19458542	4.98034e+07	0	2.63366e+06	0	0	9326400	0	0	0	0	0	0
R.C[+57.02146]NTAAPMWLN[+3517.22767]GTHPSSDEGIVSR.K	HexNAc(6)Hex(7)NeuAc(4)	223	>sp|P07911|UROM_HUMAN Uromodulin OS=Homo sapiens OX=9606 GN=UMOD PE=1 SV=1	6016.35	74851904	0	209746832	279365600	2323323904	73963880	235247504	350028352	293327168	0	0	95135896	0	0	0	0	0	0
R.C[+57.02146]NTAAPMWLN[+3575.26953]GTHPSSDEGIVSR.K	HexNAc(7)Hex(7)Fuc(1)NeuAc(3)	223	>sp|P07911|UROM_HUMAN Uromodulin OS=Homo sapiens OX=9606 GN=UMOD PE=1 SV=1	6074.4	98175600	2027502976	4249316864	1675508736	944211840	199968000	502101120	312095072	188283520	0	0	0	0	0	0	0	0	0
R.C[+57.02146]NTAAPM[+15.99492]WLN[+1954.70357]GTHPSSDEGIVSR.K	HexNAc(5)Hex(4)NeuAc(1)	223	>sp|P07911|UROM_HUMAN Uromodulin OS=Homo sapiens OX=9606 GN=UMOD PE=1 SV=1	4469.83	183903552	302835584	0	56588564	50327340	20444056	0	17489512	3.98536e+06	0	0	31053280	0	0	1.10416e+06	0	0	0
R.C[+57.02146]NTAAPM[+15.99492]WLN[+2878.01537]GTHPSSDEGIVSR.K	HexNAc(5)Hex(7)Fuc(1)NeuAc(2)	223	>sp|P07911|UROM_HUMAN Uromodulin OS=Homo sapiens OX=9606 GN=UMOD PE=1 SV=1	5393.14	8320934	5.41297e+06	29250406	0	18117944	5.08924e+07	14646113	39003628	0	0	0	1.52929e+08	0	0	951989	0	0	0
R.C[+57.02146]NTAAPM[+15.99492]WLN[+3226.13225]GTHPSSDEGIVSR.K	HexNAc(6)Hex(7)NeuAc(3)	223	>sp|P07911|UROM_HUMAN Uromodulin OS=Homo sapiens OX=9606 GN=UMOD PE=1 SV=1	5741.25	19095512	22693158	7.4198e+07	40150084	9545423	40445108	5.48004e+07	33587876	0	0	0	7.5275e+07	0	0	0	0	0	0
R.C[+57.02146]NTAAPM[+15.99492]WLN[+3575.26953]GTHPSSDEGIVSR.K	HexNAc(7)Hex(7)Fuc(1)NeuAc(3)	223	>sp|P07911|UROM_HUMAN Uromodulin OS=Homo sapiens OX=9606 GN=UMOD PE=1 SV=1	6090.39	168226816	405786912	2.62253e+08	0	9.02679e+07	117935928	46656248	384859968	294928352	0	0	1.29688e+06	0	0	0	0	0	0
K.AC[+57.02146]AGGYYVYN[+1216.42286]LTAPPEC[+57.02146]HLAYC[+57.02146]TDPSSVE.G	HexNAc(2)Hex(5)	266	>sp|P07911|UROM_HUMAN Uromodulin OS=Homo sapiens OX=9606 GN=UMOD PE=1 SV=1	4480.81	1.52047e+08	1.74925e+08	9.41234e+07	1.47518e+08	7.54946e+07	6.7717e+06	3.72398e+07	8.27255e+07	1.04696e+08	0	0	0	0	0	0	0	0	0
K.AC[+57.02146]AGGYYVYN[+1378.47569]LTAPPEC[+57.02146]HLAYC[+57.02146]TDPSSVEGTC[+57.02146]E.E	HexNAc(2)Hex(6)	266	>sp|P07911|UROM_HUMAN Uromodulin OS=Homo sapiens OX=9606 GN=UMOD PE=1 SV=1	5090	3.39447e+08	3.36609e+08	1.37617e+08	1.52473e+08	9.7222e+07	2.04505e+07	9.24072e+07	1.61104e+08	1.30478e+08	0	0	0	0	0	0	0	0	0
K.AC[+57.02146]AGGYYVYN[+1540.52851]LTAPPEC[+57.02146]HLAYC[+57.02146]TDPSSVEGTC[+57.02146]E.E	HexNAc(2)Hex(7)	266	>sp|P07911|UROM_HUMAN Uromodulin OS=Homo sapiens OX=9606 GN=UMOD PE=1 SV=1	5252.05	442084256	162150688	195923808	80218864	146777744	33399912	0	90084712	82100096	0	0	8982551	0	0	0	0	0	0
K.AC[+57.02146]AGGYYVYN[+1054.37004]LTAPPE.C	HexNAc(2)Hex(4)	266	>sp|P07911|UROM_HUMAN Uromodulin OS=Homo sapiens OX=9606 GN=UMOD PE=1 SV=1	2799.15	2.87976e+08	2.40227e+08	3.30873e+08	3.63236e+08	1.88834e+08	1.96771e+08	2.84193e+08	2.33714e+08	0	0	0	1.86424e+08	0	0	0	0	0	0
K.AC[+57.02146]AGGYYVYN[+1702.58133]LTAPPE.C	HexNAc(2)Hex(8)	266	>sp|P07911|UROM_HUMAN Uromodulin OS=Homo sapiens OX=9606 GN=UMOD PE=1 SV=1	3447.36	1.2625e+08	1.49934e+08	8.528e+07	2.04019e+08	1.10504e+08	20856270	1.41256e+08	1.3106e+08	8.27098e+07	0	0	0	0	0	0	0	0	0
K.AC[+57.02146]AGGYYVYN[+1540.52851]LTAPPEC[+57.02146]HLAYC[+57.02146]TDPSSVE.G	HexNAc(2)Hex(7)	266	>sp|P07911|UROM_HUMAN Uromodulin OS=Homo sapiens OX=9606 GN=UMOD PE=1 SV=1	4804.91	2.09721e+08	1.82277e+08	80102944	3.40524e+09	1413754112	0	1.24373e+08	1979011968	1218812288	0	0	3637922	0	0	0	0	0	0
K.AC[+57.02146]AGGYYVYN[+1825.66098]LTAPPEC[+57.02146]HLAYC[+57.02146]TDPSSVE.G	HexNAc(5)Hex(5)	266	>sp|P07911|UROM_HUMAN Uromodulin OS=Homo sapiens OX=9606 GN=UMOD PE=1 SV=1	5090.04	4.94497e+07	6.05202e+07	2.5142e+07	2.99982e+07	8.44914e+06	1.21331e+07	6.15393e+06	4.43817e+07	1.50362e+07	0	0	0	0	0	0	0	0	0
K.AC[+57.02146]AGGYYVYN[+1362.48077]LTAPPEC[+57.02146]HLAYC[+57.02146]TDPSSVEGTC[+57.02146]E.E	HexNAc(2)Hex(5)Fuc(1)	266	>sp|P07911|UROM_HUMAN Uromodulin OS=Homo sapiens OX=9606 GN=UMOD PE=1 SV=1	5074.01	4.53832e+08	0	2.51018e+08	2.6864e+08	1.67817e+08	45272704	131969744	2.60627e+08	268366448	0	0	17543534	0	0	0	0	0	0
K.QDFN[+3737.32236]ITDISLLE.H	HexNAc(7)Hex(8)Fuc(1)NeuAc(3)	319	>sp|P07911|UROM_HUMAN Uromodulin OS=Homo sapiens OX=9606 GN=UMOD PE=1 SV=1	5144.02	6.7161e+07	0	4.92873e+07	14621169	3.1581e+07	2.11956e+08	1.94628e+08	3.97452e+07	3.15532e+07	0	0	1.7478e+07	0	0	0	0	0	0
K.QDFN[+3372.19016]ITDISLLEHR.L	HexNAc(6)Hex(7)Fuc(1)NeuAc(3)	319	>sp|P07911|UROM_HUMAN Uromodulin OS=Homo sapiens OX=9606 GN=UMOD PE=1 SV=1	5072.04	0	6.47843e+08	7.65232e+08	3.6982e+08	9.04493e+08	281680512	7.97679e+08	600492992	296227072	0	0	162530576	0	0	0	0	0	0
R.DGPC[+57.02146]GTVLTRN[+2878.01537]E.T	HexNAc(5)Hex(7)Fuc(1)NeuAc(2)	386	>sp|P07911|UROM_HUMAN Uromodulin OS=Homo sapiens OX=9606 GN=UMOD PE=1 SV=1	4195.61	26312644	161984336	0	0	105457752	88064648	46708400	0	0	0	0	77104536	14445312	0	55332936	47560056	0	0
R.DGPC[+57.02146]GTVLTRN[+3372.19016]E.T	HexNAc(6)Hex(7)Fuc(1)NeuAc(3)	386	>sp|P07911|UROM_HUMAN Uromodulin OS=Homo sapiens OX=9606 GN=UMOD PE=1 SV=1	4689.79	204666912	64956788	0	50703796	3.12011e+07	6625760	22042926	0	26500364	0	0	7.98218e+06	0	0	517632	0	0	0
R.N[+2221.78776]ETHATYSNTLYLADE.I	HexNAc(4)Hex(6)Fuc(1)NeuAc(1)	396	>sp|P07911|UROM_HUMAN Uromodulin OS=Homo sapiens OX=9606 GN=UMOD PE=1 SV=1	4062.6	314136096	134608048	243383840	337300672	143533600	64824264	172879280	0	260296416	0	0	50457728	0	0	0	0	0	0
R.N[+2350.83035]ETHATYSNTLYLADE.I	HexNAc(4)Hex(5)Fuc(1)NeuAc(2)	396	>sp|P07911|UROM_HUMAN Uromodulin OS=Homo sapiens OX=9606 GN=UMOD PE=1 SV=1	4191.64	1302544256	1018231104	672320256	1449250304	567936384	103187424	953366144	272536480	505594400	0	0	0	0	0	0	0	0	0
R.N[+2878.01537]ETHATYSNTLYLADE.I	HexNAc(5)Hex(7)Fuc(1)NeuAc(2)	396	>sp|P07911|UROM_HUMAN Uromodulin OS=Homo sapiens OX=9606 GN=UMOD PE=1 SV=1	4718.83	506738528	290686464	749138688	0	414254176	127652552	407476736	697326080	320078400	0	0	121723120	0	0	0	0	0	0
R.N[+2952.05215]ETHATYSNTLYLADE.I	HexNAc(6)Hex(8)Fuc(1)NeuAc(1)	396	>sp|P07911|UROM_HUMAN Uromodulin OS=Homo sapiens OX=9606 GN=UMOD PE=1 SV=1	4792.86	2.73523e+08	5.80326e+08	2.29732e+08	3.16642e+08	2.81591e+08	0	1.51318e+08	1.54517e+08	1.35717e+08	0	0	1.23216e+08	0	0	0	0	0	0
R.N[+2295.82454]ETHATYSNTLYLADE.I	HexNAc(5)Hex(7)Fuc(1)	396	>sp|P07911|UROM_HUMAN Uromodulin OS=Homo sapiens OX=9606 GN=UMOD PE=1 SV=1	4136.64	4.5744e+08	9.58499e+08	0	9.05982e+08	3.35135e+08	1.0921e+08	1.41908e+08	5.65462e+08	3.0372e+08	0	0	5.94819e+07	0	0	0	0	0	0
R.FALLMTNC[+57.02146]YATPSSN[+2407.85181]ATDPLK.Y	HexNAc(5)Hex(5)NeuAc(2)	499	>sp|P07911|UROM_HUMAN Uromodulin OS=Homo sapiens OX=9606 GN=UMOD PE=1 SV=1	4721.95	8.01743e+08	2.14695e+08	5.09688e+08	4.41451e+08	1.22719e+08	6.20006e+07	4.3968e+08	3.5374e+08	9.54523e+07	0	0	0	0	0	0	0	0	0
R.FALLMTNC[+57.02146]YATPSSN[+2116.75640]ATDPLK.Y	HexNAc(5)Hex(5)NeuAc(1)	499	>sp|P07911|UROM_HUMAN Uromodulin OS=Homo sapiens OX=9606 GN=UMOD PE=1 SV=1	4430.85	1443701760	369826656	491046176	692720128	189515888	0	726962880	704385152	65165424	0	0	800593	0	0	0	0	0	0
R.FALLMTNC[+57.02146]YATPSSN[+2553.90972]ATDPLK.Y	HexNAc(5)Hex(5)Fuc(1)NeuAc(2)	499	>sp|P07911|UROM_HUMAN Uromodulin OS=Homo sapiens OX=9606 GN=UMOD PE=1 SV=1	4868.01	658450560	148077840	1670489344	973613504	423348064	19015900	1491289856	1987416704	2080507264	0	0	0	0	0	0	0	0	0
R.FALLMTNC[+57.02146]YATPSSN[+2756.98910]ATDPLK.Y	HexNAc(6)Hex(5)Fuc(1)NeuAc(2)	499	>sp|P07911|UROM_HUMAN Uromodulin OS=Homo sapiens OX=9606 GN=UMOD PE=1 SV=1	5071.09	555753216	243884624	285452320	38989164	315412832	87224672	69329168	401639776	165186384	0	0	0	0	0	0	0	0	0
R.FALLMTNC[+57.02146]YATPSSN[+2772.98401]ATDPLK.Y	HexNAc(6)Hex(6)NeuAc(2)	499	>sp|P07911|UROM_HUMAN Uromodulin OS=Homo sapiens OX=9606 GN=UMOD PE=1 SV=1	5087.08	1.01935e+09	295883552	535582016	312450016	287375104	53886372	357649792	317124320	30985736	0	0	0	0	0	0	0	0	0
R.FALLMTNC[+57.02146]YATPSSN[+3007.05796]ATDPLK.Y	HexNAc(5)Hex(6)Fuc(1)NeuAc(3)	499	>sp|P07911|UROM_HUMAN Uromodulin OS=Homo sapiens OX=9606 GN=UMOD PE=1 SV=1	5321.16	356513824	192277744	187438736	4.97356e+08	112411832	139414912	133400104	173326848	72681632	0	0	0	0	0	0	0	0	0
E.C[+57.02146]HSN[+3007.05796]ATC[+57.02146]TEDEAVTTC[+57.02146]TC[+57.02146]QE.G	HexNAc(5)Hex(6)Fuc(1)NeuAc(3)	35	>sp|P07911|UROM_HUMAN Uromodulin OS=Homo sapiens OX=9606 GN=UMOD PE=1 SV=1	5379.92	10372369	7.46041e+06	0	5.74057e+06	7.36288e+06	1.1315e+07	6.06839e+06	5355417	8.5187e+06	0	0	1.49957e+06	0	0	2.0778e+06	0	0	0
E.C[+57.02146]HSN[+3372.19016]ATC[+57.02146]TEDEAVTTC[+57.02146]TC[+57.02146]QE.G	HexNAc(6)Hex(7)Fuc(1)NeuAc(3)	35	>sp|P07911|UROM_HUMAN Uromodulin OS=Homo sapiens OX=9606 GN=UMOD PE=1 SV=1	5745.05	1.81541e+08	7.28467e+07	0	7.82533e+07	1.28643e+08	1.42807e+07	4.05183e+06	7.22813e+07	1.14876e+08	0	0	3.3573e+07	0	0	1.24366e+07	0	0	0
R.C[+57.02146]NTAAPMWLN[+2059.73493]GTHPSSDE.G	HexNAc(4)Hex(5)Fuc(1)NeuAc(1)	223	>sp|P07911|UROM_HUMAN Uromodulin OS=Homo sapiens OX=9606 GN=UMOD PE=1 SV=1	4046.55	231098928	375414880	2.03144e+06	597405056	175374880	22419708	21344774	62319360	80054128	0	0	854708992	0	0	0	0	0	0
R.C[+57.02146]NTAAPMWLN[+2204.77244]GTHPSSDE.G	HexNAc(4)Hex(5)NeuAc(2)	223	>sp|P07911|UROM_HUMAN Uromodulin OS=Homo sapiens OX=9606 GN=UMOD PE=1 SV=1	4191.59	665551040	963978048	340227200	1336831744	304582752	77122568	366191328	31146894	328274912	0	0	50852948	0	0	0	0	0	0
R.C[+57.02146]NTAAPMWLN[+2245.79899]GTHPSSDE.G	HexNAc(5)Hex(4)NeuAc(2)	223	>sp|P07911|UROM_HUMAN Uromodulin OS=Homo sapiens OX=9606 GN=UMOD PE=1 SV=1	4232.62	495154240	1.03843e+09	224415472	6.28436e+08	236615952	56762060	147794816	183068512	194145104	0	0	54702468	0	0	0	0	0	0
R.C[+57.02146]NTAAPMWLN[+2350.83035]GTHPSSDE.G	HexNAc(4)Hex(5)Fuc(1)NeuAc(2)	223	>sp|P07911|UROM_HUMAN Uromodulin OS=Homo sapiens OX=9606 GN=UMOD PE=1 SV=1	4337.65	284612896	478822656	109201400	3.27027e+08	2.94204e+08	39315600	227631296	78656448	98304888	0	0	22055934	0	0	0	0	0	0
R.C[+57.02146]NTAAPMWLN[+2391.85690]GTHPSSDE.G	HexNAc(5)Hex(4)Fuc(1)NeuAc(2)	223	>sp|P07911|UROM_HUMAN Uromodulin OS=Homo sapiens OX=9606 GN=UMOD PE=1 SV=1	4378.68	1.5307e+08	2.51711e+08	4.38977e+07	1.42066e+08	8.74878e+07	1.95314e+07	6.5392e+07	5.45477e+07	3.62354e+07	0	0	2.23929e+07	0	0	0	0	0	0
R.C[+57.02146]NTAAPMWLN[+2407.85181]GTHPSSDE.G	HexNAc(5)Hex(5)NeuAc(2)	223	>sp|P07911|UROM_HUMAN Uromodulin OS=Homo sapiens OX=9606 GN=UMOD PE=1 SV=1	4394.67	5.40734e+08	131962968	25580026	342030752	84329064	24285214	156482432	124680440	127882224	0	0	7.79433e+06	0	0	0	0	0	0
R.C[+57.02146]NTAAPMWLN[+2424.86713]GTHPSSDE.G	HexNAc(5)Hex(6)Fuc(1)NeuAc(1)	223	>sp|P07911|UROM_HUMAN Uromodulin OS=Homo sapiens OX=9606 GN=UMOD PE=1 SV=1	4411.69	6668716032	9359505408	5808041984	538823872	4008880128	1209779840	7027488256	4135158784	2604825856	0	0	459829	0	0	0	0	0	0
R.C[+57.02146]NTAAPMWLN[+2553.90972]GTHPSSDE.G	HexNAc(5)Hex(5)Fuc(1)NeuAc(2)	223	>sp|P07911|UROM_HUMAN Uromodulin OS=Homo sapiens OX=9606 GN=UMOD PE=1 SV=1	4540.73	182748400	148836192	76459168	281058880	128351168	37997236	107896392	199400576	81606384	0	0	260955008	0	0	0	0	0	0
R.C[+57.02146]NTAAPMWLN[+2569.90464]GTHPSSDE.G	HexNAc(5)Hex(6)NeuAc(2)	223	>sp|P07911|UROM_HUMAN Uromodulin OS=Homo sapiens OX=9606 GN=UMOD PE=1 SV=1	4556.72	3.48939e+08	1.22932e+08	2.23147e+07	4.447e+08	1.1029e+08	1.22535e+07	1.47926e+08	2.64109e+08	3.0163e+08	0	0	4.94931e+07	0	0	0	0	0	0
R.C[+57.02146]NTAAPMWLN[+3226.13225]GTHPSSDE.G	HexNAc(6)Hex(7)NeuAc(3)	223	>sp|P07911|UROM_HUMAN Uromodulin OS=Homo sapiens OX=9606 GN=UMOD PE=1 SV=1	5212.95	4.24409e+07	1.87072e+08	4.16967e+07	2.39191e+08	9.12044e+07	2.85901e+06	6.08881e+07	2.84434e+08	1.2344e+08	0	0	2.47883e+07	0	0	0	0	0	0
R.C[+57.02146]NTAAPMWLN[+3517.22767]GTHPSSDE.G	HexNAc(6)Hex(7)NeuAc(4)	223	>sp|P07911|UROM_HUMAN Uromodulin OS=Homo sapiens OX=9606 GN=UMOD PE=1 SV=1	5504.05	76413768	104010576	22355642	178179488	31839384	5332813	16543348	116478040	5.57212e+06	0	0	9290662	0	0	0	0	0	0
R.C[+57.02146]NTAAPM[+15.99492]WLN[+1954.70357]GTHPSSDE.G	HexNAc(5)Hex(4)NeuAc(1)	223	>sp|P07911|UROM_HUMAN Uromodulin OS=Homo sapiens OX=9606 GN=UMOD PE=1 SV=1	3957.52	5.70064e+08	1.23184e+08	3.8366e+06	7.48331e+07	8.06212e+07	1.63464e+07	0	5.3722e+07	2.68789e+07	0	0	2.57638e+07	0	0	3.92108e+06	0	0	0
R.C[+57.02146]NTAAPM[+15.99492]WLN[+2245.79899]GTHPSSDE.G	HexNAc(5)Hex(4)NeuAc(2)	223	>sp|P07911|UROM_HUMAN Uromodulin OS=Homo sapiens OX=9606 GN=UMOD PE=1 SV=1	4248.61	1037501376	355927808	3.99928e+06	64609444	210378976	46030520	4.10131e+06	33371090	266637632	0	0	8597013	0	0	0	0	0	0
R.C[+57.02146]NTAAPMWLN[+1954.70357]GTHPSSDEGIVSR.K	HexNAc(5)Hex(4)NeuAc(1)	223	>sp|P07911|UROM_HUMAN Uromodulin OS=Homo sapiens OX=9606 GN=UMOD PE=1 SV=1	4453.83	405012352	1417209984	44051152	534051680	163970448	20271208	119637272	44106544	12654979	0	0	58556228	0	0	0	0	0	0
R.C[+57.02146]NTAAPMWLN[+2100.76148]GTHPSSDEGIVSR.K	HexNAc(5)Hex(4)Fuc(1)NeuAc(1)	223	>sp|P07911|UROM_HUMAN Uromodulin OS=Homo sapiens OX=9606 GN=UMOD PE=1 SV=1	4599.89	270321120	620982080	3.86932e+06	241897824	124277696	3875805	166486432	29053718	2.24177e+06	0	0	10310394	0	0	0	0	0	0
R.C[+57.02146]NTAAPMWLN[+2204.77244]GTHPSSDEGIVSR.K	HexNAc(4)Hex(5)NeuAc(2)	223	>sp|P07911|UROM_HUMAN Uromodulin OS=Homo sapiens OX=9606 GN=UMOD PE=1 SV=1	4703.9	1189663744	387778112	475857728	1940504960	408763936	132103776	823674944	1309380352	163518224	0	0	72834496	0	0	0	0	0	0
R.C[+57.02146]NTAAPMWLN[+2245.79899]GTHPSSDEGIVSR.K	HexNAc(5)Hex(4)NeuAc(2)	223	>sp|P07911|UROM_HUMAN Uromodulin OS=Homo sapiens OX=9606 GN=UMOD PE=1 SV=1	4744.93	575094272	1713294336	316409472	1263826048	318532480	19624550	238376128	724732544	107514768	0	0	72776336	0	0	0	0	0	0
R.C[+57.02146]NTAAPMWLN[+2350.83035]GTHPSSDEGIVSR.K	HexNAc(4)Hex(5)Fuc(1)NeuAc(2)	223	>sp|P07911|UROM_HUMAN Uromodulin OS=Homo sapiens OX=9606 GN=UMOD PE=1 SV=1	4849.96	694455424	1262815104	190680528	1058155968	333464800	60913756	562349440	794894272	74243936	0	0	15930559	0	0	0	0	0	0
R.C[+57.02146]NTAAPMWLN[+2391.85690]GTHPSSDEGIVSR.K	HexNAc(5)Hex(4)Fuc(1)NeuAc(2)	223	>sp|P07911|UROM_HUMAN Uromodulin OS=Homo sapiens OX=9606 GN=UMOD PE=1 SV=1	4890.98	1.99176e+08	3.79152e+08	3.55416e+07	1.9071e+08	8.17378e+07	9.84467e+06	9.7179e+07	2.24954e+08	4.29195e+07	0	0	8.67294e+06	0	0	0	0	0	0
R.C[+57.02146]NTAAPMWLN[+2407.85181]GTHPSSDEGIVSR.K	HexNAc(5)Hex(5)NeuAc(2)	223	>sp|P07911|UROM_HUMAN Uromodulin OS=Homo sapiens OX=9606 GN=UMOD PE=1 SV=1	4906.98	4.00191e+08	1.57892e+08	1.23029e+08	7.23818e+08	1.66067e+08	4.71337e+07	1.24195e+08	1.94833e+08	3.79045e+07	0	0	2.56567e+06	0	0	0	0	0	0
R.C[+57.02146]NTAAPMWLN[+2553.90972]GTHPSSDEGIVSR.K	HexNAc(5)Hex(5)Fuc(1)NeuAc(2)	223	>sp|P07911|UROM_HUMAN Uromodulin OS=Homo sapiens OX=9606 GN=UMOD PE=1 SV=1	5053.04	1.81525e+08	1.85534e+08	6.57393e+07	3.65397e+08	1.76397e+08	2.63294e+07	1.35904e+08	120104656	2.77126e+07	0	0	2.0325e+06	0	0	0	0	0	0
R.C[+57.02146]NTAAPMWLN[+2569.90464]GTHPSSDEGIVSR.K	HexNAc(5)Hex(6)NeuAc(2)	223	>sp|P07911|UROM_HUMAN Uromodulin OS=Homo sapiens OX=9606 GN=UMOD PE=1 SV=1	5069.03	145769120	705161664	104553392	771305344	156225264	13353820	155688688	855080192	27668010	0	0	13802143	0	0	0	0	0	0
R.C[+57.02146]NTAAPMWLN[+2935.03683]GTHPSSDEGIVSR.K	HexNAc(6)Hex(7)NeuAc(2)	223	>sp|P07911|UROM_HUMAN Uromodulin OS=Homo sapiens OX=9606 GN=UMOD PE=1 SV=1	5434.16	80427712	494277952	26189454	575463488	49719440	11650839	156580736	475383872	14826111	0	0	18172194	0	0	0	0	0	0
R.C[+57.02146]NTAAPMWLN[+3226.13225]GTHPSSDEGIVSR.K	HexNAc(6)Hex(7)NeuAc(3)	223	>sp|P07911|UROM_HUMAN Uromodulin OS=Homo sapiens OX=9606 GN=UMOD PE=1 SV=1	5725.26	22486820	343358816	11141900	121545192	3.54498e+08	147889472	84147224	77487888	1.551e+07	0	0	36492676	0	0	0	0	0	0
R.C[+57.02146]NTAAPMWLN[+3284.17411]GTHPSSDEGIVSR.K	HexNAc(7)Hex(7)Fuc(1)NeuAc(2)	223	>sp|P07911|UROM_HUMAN Uromodulin OS=Homo sapiens OX=9606 GN=UMOD PE=1 SV=1	5783.3	1676745984	1541724032	355773856	3.00408e+09	552088768	51100664	303680416	210267232	105508480	0	0	50551740	0	0	0	0	0	0
R.C[+57.02146]NTAAPM[+15.99492]WLN[+2350.83035]GTHPSSDEGIVSR.K	HexNAc(4)Hex(5)Fuc(1)NeuAc(2)	223	>sp|P07911|UROM_HUMAN Uromodulin OS=Homo sapiens OX=9606 GN=UMOD PE=1 SV=1	4865.95	4.52687e+07	5.94103e+07	13931832	2.44696e+07	2.13033e+07	5.89703e+07	2.80951e+07	6.23486e+06	2.43545e+07	0	0	0	0	0	2.33876e+06	0	0	0
R.C[+57.02146]NTAAPM[+15.99492]WLN[+2432.88345]GTHPSSDEGIVSR.K	HexNAc(6)Hex(3)Fuc(1)NeuAc(2)	223	>sp|P07911|UROM_HUMAN Uromodulin OS=Homo sapiens OX=9606 GN=UMOD PE=1 SV=1	4948.01	1.47843e+08	9.51803e+07	5.89992e+07	2.63975e+08	7.87044e+07	8.88142e+06	1.92842e+07	5.38546e+07	1.47891e+06	0	0	3438388	0	0	0	0	0	0
R.C[+57.02146]NTAAPM[+15.99492]WLN[+2569.90464]GTHPSSDEGIVSR.K	HexNAc(5)Hex(6)NeuAc(2)	223	>sp|P07911|UROM_HUMAN Uromodulin OS=Homo sapiens OX=9606 GN=UMOD PE=1 SV=1	5085.03	16342242	26890910	4.00818e+06	7.59401e+07	8.82916e+06	1.34926e+07	10512343	20577966	4.96098e+07	0	0	3.89662e+07	0	0	0	0	0	0
R.C[+57.02146]NTAAPM[+15.99492]WLN[+3704.31212]GTHPSSDEGIVSR.K	HexNAc(7)Hex(6)Fuc(1)NeuAc(4)	223	>sp|P07911|UROM_HUMAN Uromodulin OS=Homo sapiens OX=9606 GN=UMOD PE=1 SV=1	6219.43	218638032	120017544	27521190	181373760	83029720	3.0239e+06	9233093	4.2746e+06	15784898	0	0	5.3221e+06	0	0	0	0	0	0
K.AC[+57.02146]AGGYYVYN[+1216.42286]LTAPPE.C	HexNAc(2)Hex(5)	266	>sp|P07911|UROM_HUMAN Uromodulin OS=Homo sapiens OX=9606 GN=UMOD PE=1 SV=1	2961.2	4227419136	4375938560	3163817472	4075791616	1832225920	784835136	2081650816	2305899776	1395784320	0	0	626055616	0	0	0	0	0	0
K.AC[+57.02146]AGGYYVYN[+1548.54483]LTAPPE.C	HexNAc(3)Hex(4)NeuAc(1)	266	>sp|P07911|UROM_HUMAN Uromodulin OS=Homo sapiens OX=9606 GN=UMOD PE=1 SV=1	3293.32	63345764	57225144	36366776	23324788	46846428	19775564	65059172	32358820	55448260	0	0	28749246	0	0	0	0	0	0
K.AC[+57.02146]AGGYYVYN[+1378.47569]LTAPPEC[+57.02146]HLAYC[+57.02146]TDPSSVE.G	HexNAc(2)Hex(6)	266	>sp|P07911|UROM_HUMAN Uromodulin OS=Homo sapiens OX=9606 GN=UMOD PE=1 SV=1	4642.86	1084345472	735024832	494009728	979749312	412481440	86548416	483303328	633776768	476554816	0	0	28260702	0	0	0	0	0	0
K.AC[+57.02146]AGGYYVYN[+2676.95165]LTAPPEC[+57.02146]HLAYC[+57.02146]TDPSSVEGTC[+57.02146]E.E	HexNAc(6)Hex(9)	266	>sp|P07911|UROM_HUMAN Uromodulin OS=Homo sapiens OX=9606 GN=UMOD PE=1 SV=1	6388.48	206139312	566264448	284885280	1009595264	269044768	63371472	294083520	367379200	398790400	0	0	7453697	0	0	0	0	0	0
K.QDFN[+3663.28558]ITDISLLE.H	HexNAc(6)Hex(7)Fuc(1)NeuAc(4)	319	>sp|P07911|UROM_HUMAN Uromodulin OS=Homo sapiens OX=9606 GN=UMOD PE=1 SV=1	5069.98	1.62736e+08	8.92064e+07	1.5369e+08	1.50843e+07	15859436	2.49037e+07	5.6245e+07	1.25097e+08	5.19356e+07	1.37575e+07	0	0	0	0	0	0	0	0
K.QDFN[+3372.19016]ITDISLLE.H	HexNAc(6)Hex(7)Fuc(1)NeuAc(3)	319	>sp|P07911|UROM_HUMAN Uromodulin OS=Homo sapiens OX=9606 GN=UMOD PE=1 SV=1	4778.88	299247328	320806976	293809856	15545996	0	3267473	244742928	306737920	89056536	48427112	0	77206152	0	0	0	0	0	0
R.DGPC[+57.02146]GTVLTRN[+1216.42286]E.T	HexNAc(2)Hex(5)	386	>sp|P07911|UROM_HUMAN Uromodulin OS=Homo sapiens OX=9606 GN=UMOD PE=1 SV=1	2534.02	14655889	6.87397e+06	0	7466946	10690851	17384034	5782810	0	0	0	0	10541170	9.80759e+06	0	14734279	22818244	0	0
R.DGPC[+57.02146]GTVLTRN[+2789.99933]E.T	HexNAc(6)Hex(7)Fuc(1)NeuAc(1)	386	>sp|P07911|UROM_HUMAN Uromodulin OS=Homo sapiens OX=9606 GN=UMOD PE=1 SV=1	4107.6	113933456	34765104	0	37764108	92087080	8958760	1.33146e+08	18507364	42833748	0	0	0	0	0	86816800	52945108	0	0
R.DGPC[+57.02146]GTVLTRN[+3284.17411]E.T	HexNAc(7)Hex(7)Fuc(1)NeuAc(2)	386	>sp|P07911|UROM_HUMAN Uromodulin OS=Homo sapiens OX=9606 GN=UMOD PE=1 SV=1	4601.77	54784708	7972855	0	15530881	72552136	4.0358e+06	11843407	0	15131186	0	0	11386776	0	0	1.35636e+07	707449	0	0
R.DGPC[+57.02146]GTVLTRN[+2278.80922]E.T	HexNAc(5)Hex(6)NeuAc(1)	386	>sp|P07911|UROM_HUMAN Uromodulin OS=Homo sapiens OX=9606 GN=UMOD PE=1 SV=1	3596.41	0	16224678	0	22300074	44279584	27751652	28411260	0	12922672	0	0	58458084	13498871	0	8.06335e+07	72247088	0	0
R.N[+1872.65048]ETHATYSNTLYLADE.I	HexNAc(3)Hex(6)NeuAc(1)	396	>sp|P07911|UROM_HUMAN Uromodulin OS=Homo sapiens OX=9606 GN=UMOD PE=1 SV=1	3713.46	2.89624e+08	4.24122e+08	1.6318e+07	1.0797e+08	1.61136e+08	7.21816e+07	8.46077e+07	1.72538e+08	2.81558e+07	0	0	1.18362e+07	0	0	0	0	0	0
R.N[+2204.77244]ETHATYSNTLYLADE.I	HexNAc(4)Hex(5)NeuAc(2)	396	>sp|P07911|UROM_HUMAN Uromodulin OS=Homo sapiens OX=9606 GN=UMOD PE=1 SV=1	4045.58	1882321280	2472675840	1952039680	2289365504	1215731712	547611136	1785586688	1376779392	925673920	0	0	797544000	0	0	0	0	0	0
R.N[+2715.96255]ETHATYSNTLYLADE.I	HexNAc(5)Hex(6)Fuc(1)NeuAc(2)	396	>sp|P07911|UROM_HUMAN Uromodulin OS=Homo sapiens OX=9606 GN=UMOD PE=1 SV=1	4556.77	584610944	827262272	246258576	326702784	3.6706e+08	65135332	441797728	388618528	329217088	0	0	64852896	0	0	0	0	0	0
R.N[+2861.00005]ETHATYSNTLYLADE.I	HexNAc(5)Hex(6)NeuAc(3)	396	>sp|P07911|UROM_HUMAN Uromodulin OS=Homo sapiens OX=9606 GN=UMOD PE=1 SV=1	4701.81	7.72782e+08	583182208	8.77976e+08	527203232	404848576	1.65509e+08	370889888	1.53589e+09	383572064	0	0	3.5924e+07	0	0	0	0	0	0
R.N[+2935.03683]ETHATYSNTLYLADE.I	HexNAc(6)Hex(7)NeuAc(2)	396	>sp|P07911|UROM_HUMAN Uromodulin OS=Homo sapiens OX=9606 GN=UMOD PE=1 SV=1	4775.85	169725488	286501792	168656096	261097488	103707152	16967114	2.71513e+08	263662464	181629408	0	0	43369532	0	0	0	0	0	0
R.N[+1216.42286]ETHATYSNTLYLADE.I	HexNAc(2)Hex(5)	396	>sp|P07911|UROM_HUMAN Uromodulin OS=Homo sapiens OX=9606 GN=UMOD PE=1 SV=1	3057.23	7.02988e+08	1.15337e+09	4.20428e+07	2.68807e+08	3.49136e+08	1.31427e+08	2.6965e+08	3.09375e+08	7.12922e+07	0	0	1.27098e+07	0	0	0	0	0	0
R.N[+1622.58161]ETHATYSNTLYLADE.I	HexNAc(4)Hex(5)	396	>sp|P07911|UROM_HUMAN Uromodulin OS=Homo sapiens OX=9606 GN=UMOD PE=1 SV=1	3463.39	379203296	693689920	15275093	4.55772e+08	191817504	65962072	40410968	1.58098e+08	148115760	0	0	18278684	0	0	0	0	0	0
R.N[+2278.80922]ETHATYSNTLYLADE.I	HexNAc(5)Hex(6)NeuAc(1)	396	>sp|P07911|UROM_HUMAN Uromodulin OS=Homo sapiens OX=9606 GN=UMOD PE=1 SV=1	4119.62	982126400	2135629440	77024440	2175787520	681614912	201861168	252510080	1024677888	632722048	0	0	96679320	0	0	0	0	0	0
R.N[+2569.90464]ETHATYSNTLYLADE.I	HexNAc(5)Hex(6)NeuAc(2)	396	>sp|P07911|UROM_HUMAN Uromodulin OS=Homo sapiens OX=9606 GN=UMOD PE=1 SV=1	4410.72	2904399360	4404865536	2409013504	3219543552	1780375936	612236928	2803469312	2170564096	1367245952	0	0	1170557696	0	0	0	0	0	0
R.N[+2586.91995]ETHATYSNTLYLADE.I	HexNAc(5)Hex(7)Fuc(1)NeuAc(1)	396	>sp|P07911|UROM_HUMAN Uromodulin OS=Homo sapiens OX=9606 GN=UMOD PE=1 SV=1	4427.73	1.84662e+09	2.83034e+09	1.37874e+09	2.17887e+09	1.28745e+09	4.69811e+08	1.87501e+09	1.82113e+09	1.12281e+09	0	0	8.08549e+08	0	0	0	0	0	0
R.N[+2772.98401]ETHATYSNTLYLADE.I	HexNAc(6)Hex(6)NeuAc(2)	396	>sp|P07911|UROM_HUMAN Uromodulin OS=Homo sapiens OX=9606 GN=UMOD PE=1 SV=1	4613.8	697033024	6.43138e+08	524995424	9.22902e+08	7.48032e+08	4.88971e+07	8.26983e+08	4.83853e+08	3.14838e+08	0	0	2.12634e+08	0	0	0	0	0	0
R.N[+2789.99933]ETHATYSNTLYLADE.I	HexNAc(6)Hex(7)Fuc(1)NeuAc(1)	396	>sp|P07911|UROM_HUMAN Uromodulin OS=Homo sapiens OX=9606 GN=UMOD PE=1 SV=1	4630.81	860154304	7.6535e+08	7.53319e+08	1011792192	9.09254e+08	223401408	1.00345e+09	637918720	384086720	0	0	220318192	0	0	0	0	0	0
R.FALLMTNC[+57.02146]YATPSSN[+2465.89368]ATDPLK.Y	HexNAc(6)Hex(5)Fuc(1)NeuAc(1)	499	>sp|P07911|UROM_HUMAN Uromodulin OS=Homo sapiens OX=9606 GN=UMOD PE=1 SV=1	4779.99	81904768	280749152	37360264	144967184	105827840	17905662	44073392	51266656	73495280	0	0	13371556	0	0	0	0	0	0
R.FALLMTNC[+57.02146]YATPSSN[+1768.63952]ATDPLK.Y	HexNAc(4)Hex(5)Fuc(1)	499	>sp|P07911|UROM_HUMAN Uromodulin OS=Homo sapiens OX=9606 GN=UMOD PE=1 SV=1	4082.74	5.03205e+08	3.51681e+08	108746688	6.10963e+08	2.1891e+08	25165268	2.54364e+08	4.55919e+08	1.78348e+08	0	0	29267166	0	0	0	0	0	0
R.FALLMTNC[+57.02146]YATPSSN[+1809.66607]ATDPLK.Y	HexNAc(5)Hex(4)Fuc(1)	499	>sp|P07911|UROM_HUMAN Uromodulin OS=Homo sapiens OX=9606 GN=UMOD PE=1 SV=1	4123.76	200627552	2.97383e+08	35056904	222291776	52536592	6.72554e+06	6.97037e+07	94844432	48936288	0	0	6.82869e+06	0	0	0	0	0	0
R.FALLMTNC[+57.02146]YATPSSN[+1850.69261]ATDPLK.Y	HexNAc(6)Hex(3)Fuc(1)	499	>sp|P07911|UROM_HUMAN Uromodulin OS=Homo sapiens OX=9606 GN=UMOD PE=1 SV=1	4164.79	472877536	837543808	66497968	1018205184	99865360	7721678	255216720	252786256	55264208	0	0	7.35522e+06	0	0	0	0	0	0
R.FALLMTNC[+57.02146]YATPSSN[+2100.76148]ATDPLK.Y	HexNAc(5)Hex(4)Fuc(1)NeuAc(1)	499	>sp|P07911|UROM_HUMAN Uromodulin OS=Homo sapiens OX=9606 GN=UMOD PE=1 SV=1	4414.86	7.7004e+08	1.10167e+09	2.93306e+08	6.58437e+08	4.36492e+08	5.44526e+07	2.06036e+08	3.45471e+08	3.85252e+08	0	0	8.25132e+07	0	0	0	0	0	0
R.FALLMTNC[+57.02146]YATPSSN[+2133.77171]ATDPLK.Y	HexNAc(5)Hex(6)Fuc(1)	499	>sp|P07911|UROM_HUMAN Uromodulin OS=Homo sapiens OX=9606 GN=UMOD PE=1 SV=1	4447.87	1.23893e+08	1.2253e+08	14613647	1.18966e+08	5.01805e+07	10814066	6.51948e+07	2.77732e+08	7.51384e+07	0	0	25118400	0	0	0	0	0	0
R.FALLMTNC[+57.02146]YATPSSN[+2391.85690]ATDPLK.Y	HexNAc(5)Hex(4)Fuc(1)NeuAc(2)	499	>sp|P07911|UROM_HUMAN Uromodulin OS=Homo sapiens OX=9606 GN=UMOD PE=1 SV=1	4705.95	653076160	424060864	33844384	302355680	179888624	34186944	98006200	275280256	174187040	0	0	19284270	0	0	0	0	0	0
R.FALLMTNC[+57.02146]YATPSSN[+2789.99933]ATDPLK.Y	HexNAc(6)Hex(7)Fuc(1)NeuAc(1)	499	>sp|P07911|UROM_HUMAN Uromodulin OS=Homo sapiens OX=9606 GN=UMOD PE=1 SV=1	5104.1	3.07841e+08	4.83281e+07	1.24873e+08	8.5774e+07	8.79741e+07	12261077	7.15983e+07	1.505e+08	3.76294e+07	0	0	1.72107e+06	0	0	0	0	0	0
R.FALLMTNC[+57.02146]YATPSSN[+2919.04192]ATDPLK.Y	HexNAc(6)Hex(6)Fuc(1)NeuAc(2)	499	>sp|P07911|UROM_HUMAN Uromodulin OS=Homo sapiens OX=9606 GN=UMOD PE=1 SV=1	5233.14	727532224	284268256	338930080	380133216	689374912	96779896	462098016	428674368	207725184	0	0	34220344	0	0	0	0	0	0
R.FALLMTNC[+57.02146]YATPSSN[+3081.09474]ATDPLK.Y	HexNAc(6)Hex(7)Fuc(1)NeuAc(2)	499	>sp|P07911|UROM_HUMAN Uromodulin OS=Homo sapiens OX=9606 GN=UMOD PE=1 SV=1	5395.19	204552448	136365680	205651840	22619066	189803648	10715832	73812800	242622048	110145912	0	0	13476155	0	0	0	0	0	0
R.FALLM[+15.99492]TNC[+57.02146]YATPSSN[+1768.63952]ATDPLK.Y	HexNAc(4)Hex(5)Fuc(1)	499	>sp|P07911|UROM_HUMAN Uromodulin OS=Homo sapiens OX=9606 GN=UMOD PE=1 SV=1	4098.73	72746352	32432724	18805268	9.51475e+07	30454914	21960256	78338728	101533256	32632710	0	0	49811004	0	0	0	0	0	0
R.FALLM[+15.99492]TNC[+57.02146]YATPSSN[+2100.76148]ATDPLK.Y	HexNAc(5)Hex(4)Fuc(1)NeuAc(1)	499	>sp|P07911|UROM_HUMAN Uromodulin OS=Homo sapiens OX=9606 GN=UMOD PE=1 SV=1	4430.85	1.37933e+08	1.15041e+08	6.29082e+07	38197424	42558584	4.11141e+07	1.34717e+07	7.06748e+07	35284996	0	0	138186240	0	0	0	0	0	0
R.FALLM[+15.99492]TNC[+57.02146]YATPSSN[+2350.83035]ATDPLK.Y	HexNAc(4)Hex(5)Fuc(1)NeuAc(2)	499	>sp|P07911|UROM_HUMAN Uromodulin OS=Homo sapiens OX=9606 GN=UMOD PE=1 SV=1	4680.92	203558768	86914064	206003072	164577840	109535472	303144608	165982112	73765536	106629064	0	0	363907264	0	0	0	0	0	0
R.FALLM[+15.99492]TNC[+57.02146]YATPSSN[+2424.86713]ATDPLK.Y	HexNAc(5)Hex(6)Fuc(1)NeuAc(1)	499	>sp|P07911|UROM_HUMAN Uromodulin OS=Homo sapiens OX=9606 GN=UMOD PE=1 SV=1	4754.96	24479044	29236928	35989164	59601888	94242784	111830560	111334568	124531392	43696924	0	0	283850912	0	0	0	0	0	0
R.FALLM[+15.99492]TNC[+57.02146]YATPSSN[+2919.04192]ATDPLK.Y	HexNAc(6)Hex(6)Fuc(1)NeuAc(2)	499	>sp|P07911|UROM_HUMAN Uromodulin OS=Homo sapiens OX=9606 GN=UMOD PE=1 SV=1	5249.13	1.56846e+08	4.45076e+07	3.32064e+07	1.03883e+08	7.32815e+07	7.02323e+07	8.43434e+07	5.27992e+07	2.9229e+07	0	0	8.77118e+07	0	0	0	0	0	0
R.C[+57.02146]NTAAPM[+15.99492]WLN[+2204.77244]GTHPSSDE.G	HexNAc(4)Hex(5)NeuAc(2)	223	>sp|P07911|UROM_HUMAN Uromodulin OS=Homo sapiens OX=9606 GN=UMOD PE=1 SV=1	4207.59	78951352	106746728	14014806	95681800	105010528	185510896	39992416	163628224	260074032	0	0	51556132	0	0	18751760	0	0	0
R.C[+57.02146]NTAAPM[+15.99492]WLN[+2204.77244]GTHPSSDEGIVSR.K	HexNAc(4)Hex(5)NeuAc(2)	223	>sp|P07911|UROM_HUMAN Uromodulin OS=Homo sapiens OX=9606 GN=UMOD PE=1 SV=1	4719.89	75647872	19513726	65871596	74169312	32381130	175245888	179136512	21921900	99741520	0	0	278110240	0	0	6589812	0	0	0
R.C[+57.02146]NTAAPM[+15.99492]WLN[+2245.79899]GTHPSSDEGIVSR.K	HexNAc(5)Hex(4)NeuAc(2)	223	>sp|P07911|UROM_HUMAN Uromodulin OS=Homo sapiens OX=9606 GN=UMOD PE=1 SV=1	4760.92	801025536	707883904	64036868	474523744	69365688	76113008	23812170	29783780	30068086	0	0	330568448	0	0	3327959	0	0	0
R.C[+57.02146]NTAAPM[+15.99492]WLN[+2861.00005]GTHPSSDEGIVSR.K	HexNAc(5)Hex(6)NeuAc(3)	223	>sp|P07911|UROM_HUMAN Uromodulin OS=Homo sapiens OX=9606 GN=UMOD PE=1 SV=1	5376.12	76000656	17607458	82740240	58073140	26926948	118099672	67688816	47977544	2.20671e+06	0	0	83234048	0	0	1.21668e+06	0	0	0
R.DGPC[+57.02146]GTVLTRN[+2075.72985]E.T	HexNAc(4)Hex(6)NeuAc(1)	386	>sp|P07911|UROM_HUMAN Uromodulin OS=Homo sapiens OX=9606 GN=UMOD PE=1 SV=1	3393.33	352468128	8.05708e+07	10197754	77390032	0	2.19691e+06	144178608	0	162696112	0	0	149352048	0	5616565	26541984	13913035	0	0
R.DGPC[+57.02146]GTVLTRN[+2919.04192]E.T	HexNAc(6)Hex(6)Fuc(1)NeuAc(2)	386	>sp|P07911|UROM_HUMAN Uromodulin OS=Homo sapiens OX=9606 GN=UMOD PE=1 SV=1	4236.64	455811808	71255448	39086392	194972432	607852480	167403488	0	0	138953664	0	0	97144824	0	5.89674e+06	207678848	47391756	0	0
R.DGPC[+57.02146]GTVLTRN[+2935.03683]E.T	HexNAc(6)Hex(7)NeuAc(2)	386	>sp|P07911|UROM_HUMAN Uromodulin OS=Homo sapiens OX=9606 GN=UMOD PE=1 SV=1	4252.64	5117144	449556	0	6.79639e+06	25548226	881739	1.95845e+06	724447	14020858	0	0	51996884	0	0	4.00878e+07	34149536	0	0
R.DGPC[+57.02146]GTVLTRN[+3081.09474]E.T	HexNAc(6)Hex(7)Fuc(1)NeuAc(2)	386	>sp|P07911|UROM_HUMAN Uromodulin OS=Homo sapiens OX=9606 GN=UMOD PE=1 SV=1	4398.69	2.7971e+08	1.04884e+08	17688972	87058424	197501616	39968204	56456996	0	9.18233e+07	0	0	68583640	0	0	4.33965e+07	2.19695e+07	0	0
R.N[+1913.67702]ETHATYSNTLYLADE.I	HexNAc(4)Hex(5)NeuAc(1)	396	>sp|P07911|UROM_HUMAN Uromodulin OS=Homo sapiens OX=9606 GN=UMOD PE=1 SV=1	3754.49	5650951680	8.77449e+09	365184704	7244936704	3.36026e+09	1.22652e+09	1497391232	4417083904	2343099136	0	0	453293856	0	0	23243698	0	0	0
R.N[+2059.73493]ETHATYSNTLYLADE.I	HexNAc(4)Hex(5)Fuc(1)NeuAc(1)	396	>sp|P07911|UROM_HUMAN Uromodulin OS=Homo sapiens OX=9606 GN=UMOD PE=1 SV=1	3900.55	3.31761e+09	4.27034e+09	149561728	4055790592	2.216e+09	509140928	9.26125e+08	1519587072	1650125056	0	0	129624304	0	0	8716293	0	0	0
R.FALLMTNC[+57.02146]YATPSSN[+2059.73493]ATDPLK.Y	HexNAc(4)Hex(5)Fuc(1)NeuAc(1)	499	>sp|P07911|UROM_HUMAN Uromodulin OS=Homo sapiens OX=9606 GN=UMOD PE=1 SV=1	4373.83	2905970688	3451662592	1816591360	3015526912	2342730752	403341024	1885589504	3034149632	1703833600	12295195	0	354966624	0	0	0	0	0	0
R.FALLMTNC[+57.02146]YATPSSN[+2350.83035]ATDPLK.Y	HexNAc(4)Hex(5)Fuc(1)NeuAc(2)	499	>sp|P07911|UROM_HUMAN Uromodulin OS=Homo sapiens OX=9606 GN=UMOD PE=1 SV=1	4664.93	2980159232	1470103680	1754456192	1618483840	1628211456	382485568	1620657280	2110099456	1203229056	3.50728e+06	0	225627056	0	0	0	0	0	0
R.FALLMTNC[+57.02146]YATPSSN[+2424.86713]ATDPLK.Y	HexNAc(5)Hex(6)Fuc(1)NeuAc(1)	499	>sp|P07911|UROM_HUMAN Uromodulin OS=Homo sapiens OX=9606 GN=UMOD PE=1 SV=1	4738.96	652920832	1012394624	443717472	743169344	834425280	181075312	629206592	843354944	677240064	129397176	0	172324912	0	0	0	0	0	0
R.FALLMTNC[+57.02146]YATPSSN[+2715.96255]ATDPLK.Y	HexNAc(5)Hex(6)Fuc(1)NeuAc(2)	499	>sp|P07911|UROM_HUMAN Uromodulin OS=Homo sapiens OX=9606 GN=UMOD PE=1 SV=1	5030.06	2.74474e+09	2.04971e+09	1.76405e+09	1.66648e+09	2.23553e+09	520810880	1.80282e+09	2.68107e+09	1514858368	13025285	0	4.03625e+08	0	0	0	0	0	0
R.FALLM[+15.99492]TNC[+57.02146]YATPSSN[+2715.96255]ATDPLK.Y	HexNAc(5)Hex(6)Fuc(1)NeuAc(2)	499	>sp|P07911|UROM_HUMAN Uromodulin OS=Homo sapiens OX=9606 GN=UMOD PE=1 SV=1	5046.05	622885952	268695136	230322288	318767872	3.54076e+08	296326624	329899648	343227808	156818944	5389787	0	6.02697e+08	0	0	0	0	0	0
R.FALLM[+15.99492]TNC[+57.02146]YATPSSN[+3007.05796]ATDPLK.Y	HexNAc(5)Hex(6)Fuc(1)NeuAc(3)	499	>sp|P07911|UROM_HUMAN Uromodulin OS=Homo sapiens OX=9606 GN=UMOD PE=1 SV=1	5337.15	353858528	47011348	428964608	11729063	319550592	356690592	261579696	240379984	103258304	726250	0	433362112	0	0	0	0	0	0
K.AC[+57.02146]AGGYYVYN[+1540.52851]LTAPPE.C	HexNAc(2)Hex(7)	266	>sp|P07911|UROM_HUMAN Uromodulin OS=Homo sapiens OX=9606 GN=UMOD PE=1 SV=1	3285.31	2978434048	3900597248	2120152064	4650701824	2210230272	880073024	2259617792	3126281728	1246136192	2.16454e+06	0	611454144	0	0	1.51127e+06	0	0	0
R.DGPC[+57.02146]GTVLTRN[+2627.94650]E.T	HexNAc(6)Hex(6)Fuc(1)NeuAc(1)	386	>sp|P07911|UROM_HUMAN Uromodulin OS=Homo sapiens OX=9606 GN=UMOD PE=1 SV=1	3945.54	112676888	19479446	5.22088e+06	38848236	111169064	18679382	25822228	10106972	23419634	0	0	11110954	0	0	45049552	12450383	0	0
R.DGPC[+57.02146]GTVLTRN[+2861.00005]E.T	HexNAc(5)Hex(6)NeuAc(3)	386	>sp|P07911|UROM_HUMAN Uromodulin OS=Homo sapiens OX=9606 GN=UMOD PE=1 SV=1	4178.6	37186076	11668931	13109571	86017848	129357376	99668248	22874350	0	53788000	0	0	127116328	0	4.74539e+06	8.04271e+07	76025952	0	0
R.DGPC[+57.02146]GTVLTRN[+2262.81431]E.T	HexNAc(5)Hex(5)Fuc(1)NeuAc(1)	386	>sp|P07911|UROM_HUMAN Uromodulin OS=Homo sapiens OX=9606 GN=UMOD PE=1 SV=1	3580.41	403639328	69667728	25745574	148272320	394174176	97601968	86493616	22892020	63804768	0	0	0	0	4427158	187886448	55531880	0	0
R.DGPC[+57.02146]GTVLTRN[+2553.90972]E.T	HexNAc(5)Hex(5)Fuc(1)NeuAc(2)	386	>sp|P07911|UROM_HUMAN Uromodulin OS=Homo sapiens OX=9606 GN=UMOD PE=1 SV=1	3871.51	686773376	66684296	46048756	3.75812e+08	6.90043e+08	227696080	0	73407576	152619584	0	0	0	3622149	12961060	233050416	54269880	0	0
R.FALLM[+15.99492]TNC[+57.02146]YATPSSN[+2059.73493]ATDPLK.Y	HexNAc(4)Hex(5)Fuc(1)NeuAc(1)	499	>sp|P07911|UROM_HUMAN Uromodulin OS=Homo sapiens OX=9606 GN=UMOD PE=1 SV=1	4389.83	607516928	253056368	282710752	253210144	316570688	268445760	552811072	525468096	199135632	6576402	1.13551e+06	705079680	0	0	0	0	0	0
R.DGPC[+57.02146]GTVLTRN[+2018.70838]E.T	HexNAc(3)Hex(6)Fuc(1)NeuAc(1)	386	>sp|P07911|UROM_HUMAN Uromodulin OS=Homo sapiens OX=9606 GN=UMOD PE=1 SV=1	3336.31	1.43692e+08	27361604	27887334	43878060	105857040	214833008	36074624	3.22001e+07	38940688	0	0	35188548	0	3334714	5.08633e+07	14188164	0	0
R.DGPC[+57.02146]GTVLTRN[+1768.63952]E.T	HexNAc(4)Hex(5)Fuc(1)	386	>sp|P07911|UROM_HUMAN Uromodulin OS=Homo sapiens OX=9606 GN=UMOD PE=1 SV=1	3086.24	6.76775e+08	6.90129e+08	4.75424e+06	3.09518e+08	4.32365e+08	1.15389e+08	34852408	0	4.17285e+08	0	0	5.2464e+07	1.71918e+06	8.03962e+06	1.17593e+08	4.40108e+07	0	0
R.DGPC[+57.02146]GTVLTRN[+2569.90464]E.T	HexNAc(5)Hex(6)NeuAc(2)	386	>sp|P07911|UROM_HUMAN Uromodulin OS=Homo sapiens OX=9606 GN=UMOD PE=1 SV=1	3887.5	31891252	23744348	5.67723e+06	32994774	147441616	149152288	34000896	33583340	35492796	0	0	301427904	0	19981396	270268768	2.63986e+08	0	0
R.DGPC[+57.02146]GTVLTRN[+2715.96255]E.T	HexNAc(5)Hex(6)Fuc(1)NeuAc(2)	386	>sp|P07911|UROM_HUMAN Uromodulin OS=Homo sapiens OX=9606 GN=UMOD PE=1 SV=1	4033.56	1.51697e+09	4.89061e+08	127291528	612218048	1.63512e+09	5.67653e+08	407346464	310985280	763814592	6.08184e+06	0	0	0	42446112	4.10571e+08	1.62018e+08	0	0
K.AC[+57.02146]AGGYYVYN[+1378.47569]LTAPPE.C	HexNAc(2)Hex(6)	266	>sp|P07911|UROM_HUMAN Uromodulin OS=Homo sapiens OX=9606 GN=UMOD PE=1 SV=1	3123.25	23197030400	25802999808	13264004096	26053398528	10231479296	5271702016	10205821952	16970087424	7648113152	6955450	1.79744e+06	4667614720	0	0	6740130	704868	0	0
R.DGPC[+57.02146]GTVLTRN[+3007.05796]E.T	HexNAc(5)Hex(6)Fuc(1)NeuAc(3)	386	>sp|P07911|UROM_HUMAN Uromodulin OS=Homo sapiens OX=9606 GN=UMOD PE=1 SV=1	4324.66	7.72314e+08	3.10995e+08	58106016	2.98237e+08	4.40443e+08	167714400	141953904	134856112	227228400	0	0	82679768	12814343	5729959	5.61066e+07	24460880	0	0
R.DGPC[+57.02146]GTVLTRN[+1913.67702]E.T	HexNAc(4)Hex(5)NeuAc(1)	386	>sp|P07911|UROM_HUMAN Uromodulin OS=Homo sapiens OX=9606 GN=UMOD PE=1 SV=1	3231.28	74515184	40951176	0	73988776	186156112	238426832	32830740	18362084	41945012	26749694	0	299649312	84347544	52101212	749878336	475614976	0	0
R.DGPC[+57.02146]GTVLTRN[+2204.77244]E.T	HexNAc(4)Hex(5)NeuAc(2)	386	>sp|P07911|UROM_HUMAN Uromodulin OS=Homo sapiens OX=9606 GN=UMOD PE=1 SV=1	3522.37	86191496	35895836	9290256	62782240	152664768	186486464	39658468	19172482	45051400	0	0	155907440	37493624	18718604	225150224	163799504	0	0
R.DGPC[+57.02146]GTVLTRN[+2350.83035]E.T	HexNAc(4)Hex(5)Fuc(1)NeuAc(2)	386	>sp|P07911|UROM_HUMAN Uromodulin OS=Homo sapiens OX=9606 GN=UMOD PE=1 SV=1	3668.43	2312263424	6.65783e+08	129831576	1.00298e+09	1.88925e+09	7.94311e+08	483212704	3.78761e+08	1.0146e+09	0	0	3.1164e+08	61131488	55592136	4.42559e+08	1.58117e+08	0	0
R.DGPC[+57.02146]GTVLTRN[+2424.86713]E.T	HexNAc(5)Hex(6)Fuc(1)NeuAc(1)	386	>sp|P07911|UROM_HUMAN Uromodulin OS=Homo sapiens OX=9606 GN=UMOD PE=1 SV=1	3742.47	747877568	255473072	32247980	3.58619e+08	6.76503e+08	203331424	3.28752e+08	1.18843e+08	306287392	0	0	137060272	19280938	13558122	2.08419e+08	80745632	0	0
R.DGPC[+57.02146]GTVLTRN[+2059.73493]E.T	HexNAc(4)Hex(5)Fuc(1)NeuAc(1)	386	>sp|P07911|UROM_HUMAN Uromodulin OS=Homo sapiens OX=9606 GN=UMOD PE=1 SV=1	3377.33	7.26999e+09	2.06586e+09	9.41554e+08	2.19018e+09	6.55801e+09	2.4513e+09	1.39373e+09	8.40254e+08	2.05547e+09	8.70581e+07	11712147	1.22753e+09	2.11758e+08	2.95659e+08	3.19351e+09	9.10153e+08	0	0

## Sheet: Table S5.2
Supplementary Table S5.2. The relative abundance of site-specific N-glycosylation modifications of Umod from the HC and IgAN groups.
N-glycosite	HC01	HC02	HC03	HC04	HC05	HC06	HC07	HC08	HC09	Average	SD	Ratio	IgAN01	IgAN02	IgAN03	IgAN04	IgAN05	IgAN06	IgAN07	IgAN08	IgAN09	Average	SD	Ratio
N38	1.13247e+09	1.11528e+09	5.85223e+07	1.62252e+09	6.59532e+08	1.32974e+08	1.15835e+08	2.09158e+08	3.47685e+08	5.99331e+08	5.65716e+08	0.00545069	0	0	1.64825e+08	0	0	4.76649e+07	5.365e+06	0	0	2.42061e+07	5.49939e+07	0.00553059
N232	4.55844e+10	7.87482e+10	2.56151e+10	6.69865e+10	2.92508e+10	5.78604e+09	2.58817e+10	2.01216e+10	1.79878e+10	3.51069e+10	2.40247e+10	0.319284	0	0	5.51686e+09	0	0	6.07984e+07	0	0	0	6.1974e+08	1.83653e+09	0.141598
N275	3.68882e+10	4.5275e+10	2.36871e+10	4.66301e+10	1.92893e+10	8.43751e+09	2.05234e+10	2.97029e+10	1.81465e+10	2.762e+10	1.30205e+10	0.251194	9.11999e+06	1.79744e+06	6.32059e+09	0	0	8.2514e+06	704868	0	0	7.04496e+08	2.10604e+09	0.160963
N322	6.76553e+08	1.35237e+09	1.43749e+09	9.52784e+08	1.26329e+09	1.11258e+09	1.35052e+09	1.48359e+09	6.16263e+08	1.13838e+09	3.23273e+08	0.0103532	1.56342e+08	0	6.24459e+08	0	0	0	0	0	0	8.67556e+07	2.08162e+08	0.0198218
N396	4.69661e+10	4.13545e+10	1.3662e+10	4.25784e+10	3.416e+10	1.10933e+10	1.926e+10	2.11148e+10	1.78114e+10	2.75556e+10	1.37194e+10	0.250608	1.1989e+08	11712147	7.91026e+09	4.74174e+08	5.58521e+08	7.45277e+09	3.20312e+09	0	0	2.19227e+09	3.27247e+09	0.500888
N513	2.89678e+10	1.69437e+10	1.68184e+10	2.37839e+10	1.96471e+10	7.04791e+09	1.56492e+10	2.16193e+10	1.09355e+10	1.79348e+10	6.5899e+09	0.16311	1.70917e+08	1.13551e+06	6.57165e+09	0	0	0	0	0	0	7.49301e+08	2.18411e+09	0.171199
