# Supplementary material for: Characterization of site-specific N-glycosylation signatures of isolated uromodulin from human urine
Source: Royal Society of Chemistry journal article supplement (doi:10.1039/d3an01018j), 2023-01-01
Supplement: d3an01018j6.pdf [file d3an01018j6.pdf]

**Supporting information for**  
**Characterization of site-specific N-glycosylation signatures of isolated**  
**uromodulin from human urine**

Tianhai Lin<sup>1,2,†</sup>, Zhuo Chen<sup>3,†</sup>, Mengqi Luo<sup>1</sup>, Yang Zhao<sup>4</sup>, Wenjuan Zeng<sup>1</sup>, Shanshan Zheng<sup>1</sup>, Tao Su<sup>1</sup>, Yi  
Zhong<sup>1</sup>, Shisheng Wang<sup>1</sup>, Youmei Jin<sup>1</sup>, Liqiang Hu<sup>1</sup>, Wanjun Zhao<sup>5</sup>, Jiaxu Li<sup>6</sup>, Xuanyi Wang<sup>7</sup>, Changwei  
Wu<sup>8</sup>, Dapeng Li<sup>9</sup>, Fang Liu<sup>1,\*</sup>, Guisen Li<sup>8,\*</sup>, Hao Yang<sup>1,3,\*</sup>, Yong Zhang<sup>1,3,\*</sup>

<sup>1</sup>Department of Nephrology and Institutes for Systems Genetics, Frontiers Science Center for Disease-Related Molecular Network, West China Hospital, Sichuan University, Chengdu 610041, China.

<sup>2</sup>Department of Urology, West China Hospital, Sichuan University, Chengdu 610041, China.

<sup>3</sup>Transplant Center and NHC Key Lab of Transplant Engineering and Immunology, Regenerative Medical Research Center, West China Hospital, Sichuan University, Chengdu 610041, China.

<sup>4</sup>Technology Innovation Center of Mass Spectrometry for State Market Regulation, Center for Advanced Measurement Science, National Institute of Metrology, Beijing 100029, China

<sup>5</sup>Division of Thyroid Surgery, Department of General Surgery of Nursing, West China Hospital, Sichuan University, Chengdu 610041, China.

<sup>6</sup>School of Nursing, Chengde Medical University, Chengde, Hebei 067000, China

<sup>7</sup>Mingde College, Zhangjiakou University, Zhangjiakou, Hebei 075000, China

<sup>8</sup>Renal Department and Institute of Nephrology, Sichuan Provincial People's Hospital, University of Electronic Science and Technology of China, Sichuan Clinical Research Center for Kidney Diseases, Chengdu 611731, China.

<sup>9</sup>Key Laboratory of Drug-Targeting and Drug Delivery System of the Education Ministry and Sichuan Province, West China School of Pharmacy, Sichuan University, Chengdu 610041, China.

<sup>†</sup>These authors contributed equally to this work.

**Running title:** N-glycosylation of urinary uromodulin

**\*Corresponding authors.**

**Address:** No. 1, Keyuan 4th Road, Gaopeng Avenue, Hi-tech Zone, Chengdu 610041, China. Phone/Fax: +86-28-85164031; **E-mail:** nankai1989@foxmail.com (Y. Zhang), yanghao@scu.edu.cn (H. Yang), guisenli@163.com (G. Li), liufangfh@163.com (F. Liu)

## **Supplementary Figures and Tables**

**Supplementary Figure S1.** The spectrum of intact N-glycopeptides with the unambiguously assigned N-glycosite (N38).

**Supplementary Figure S2.** The spectrum of intact N-glycopeptides with the unambiguously assigned N-glycosite (N80).

**Supplementary Figure S3.** The spectrum of intact N-glycopeptides with the unambiguously assigned N-glycosite (N232).

**Supplementary Figure S4.** The spectrum of intact N-glycopeptides with the unambiguously assigned N-glycosite (N275).

**Supplementary Figure S5.** The spectrum of intact N-glycopeptides with the unambiguously assigned N-glycosite (N322).

**Supplementary Figure S6.** The spectrum of intact N-glycopeptides with the unambiguously assigned N-glycosite (N396).

**Supplementary Figure S7.** The spectrum of intact N-glycopeptides with the unambiguously assigned N-glycosite (N513).

**Supplementary Figure S8.** SDS-PAGE and WB analysis of Umod from HC (n=5) and IgAN patients (n=5).

**Supplementary Table S1.** Gray value analysis of SDS-PAGE gel (Fig.1E).

**Supplementary Table S2.** Identified and quantified intact N-glycopeptides from Umod using trypsin or/and Glu-C with/without HILIC enrichment.

**Supplementary Table S3.** Site-specific N-glycosylation analysis of Umod.

**Supplementary Table S4.** Basic information about the source of these urine samples.

**Supplementary Table S5.** Quantified intact N-glycopeptides of Umod from HC and IgAN group.

N-glycosite (N38).

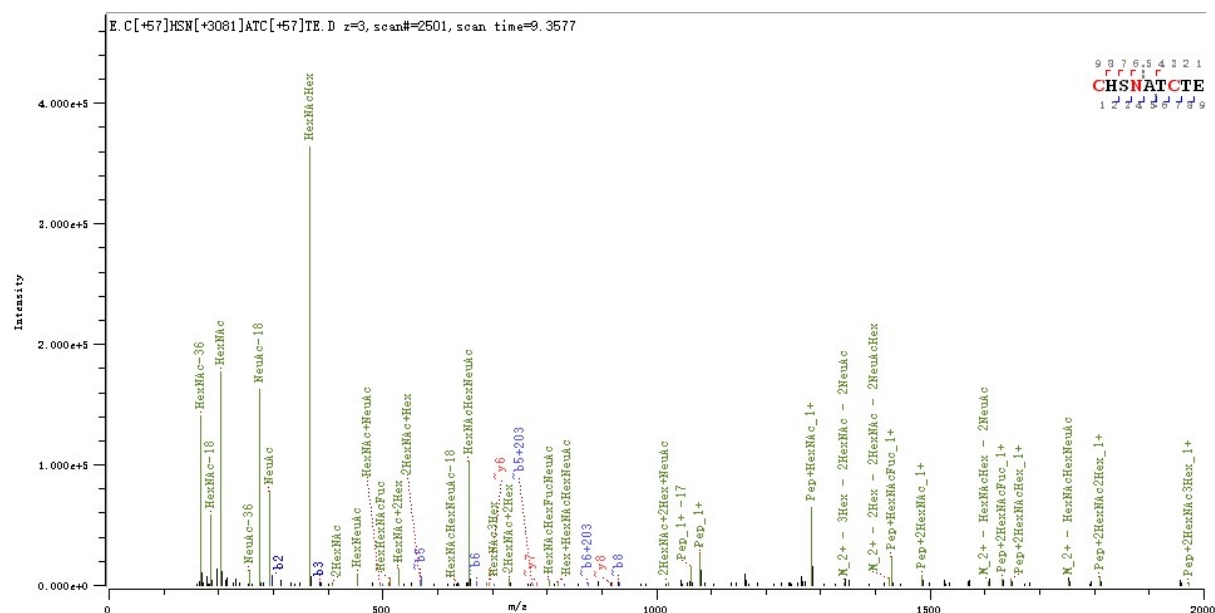

N-glycosite (N80).

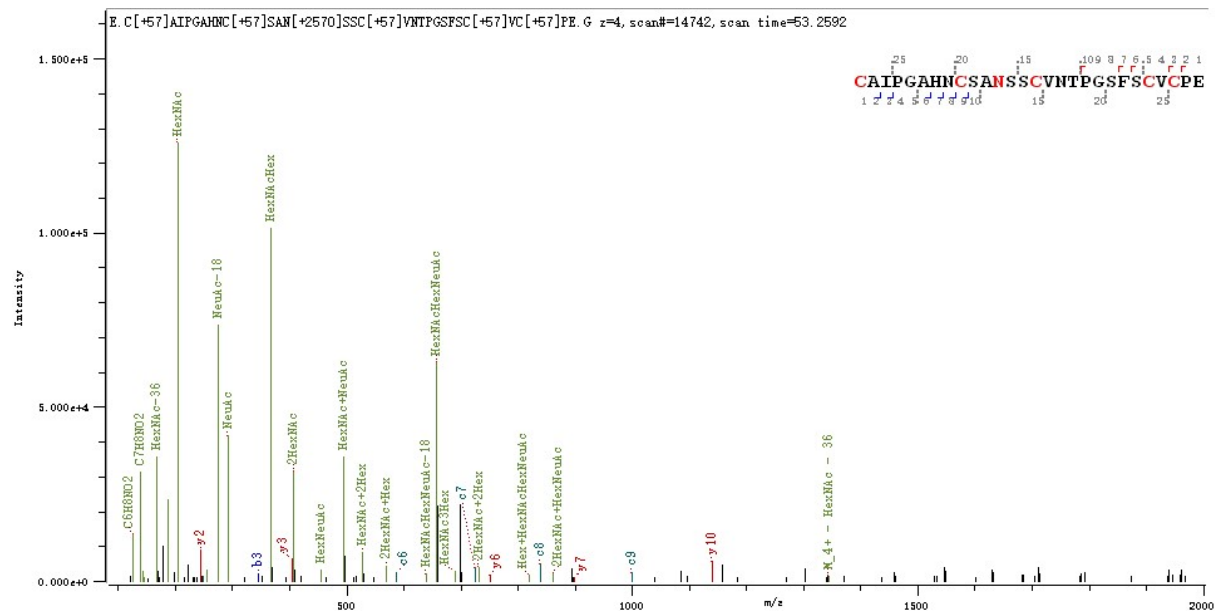

N-glycosite (N232).

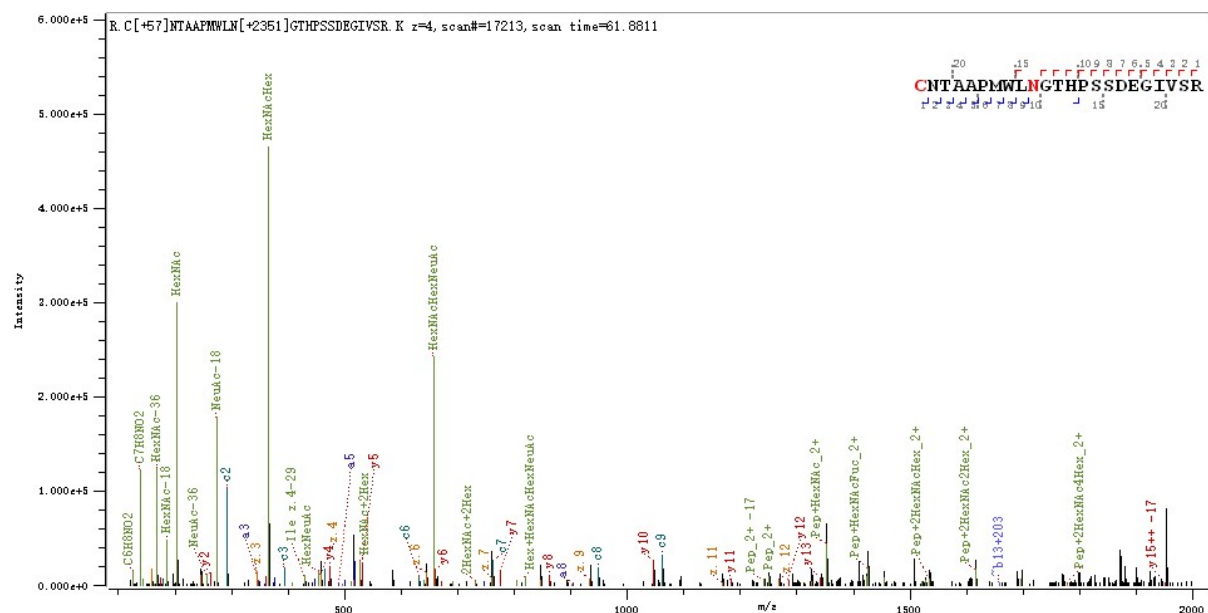

N-glycosite (N275).

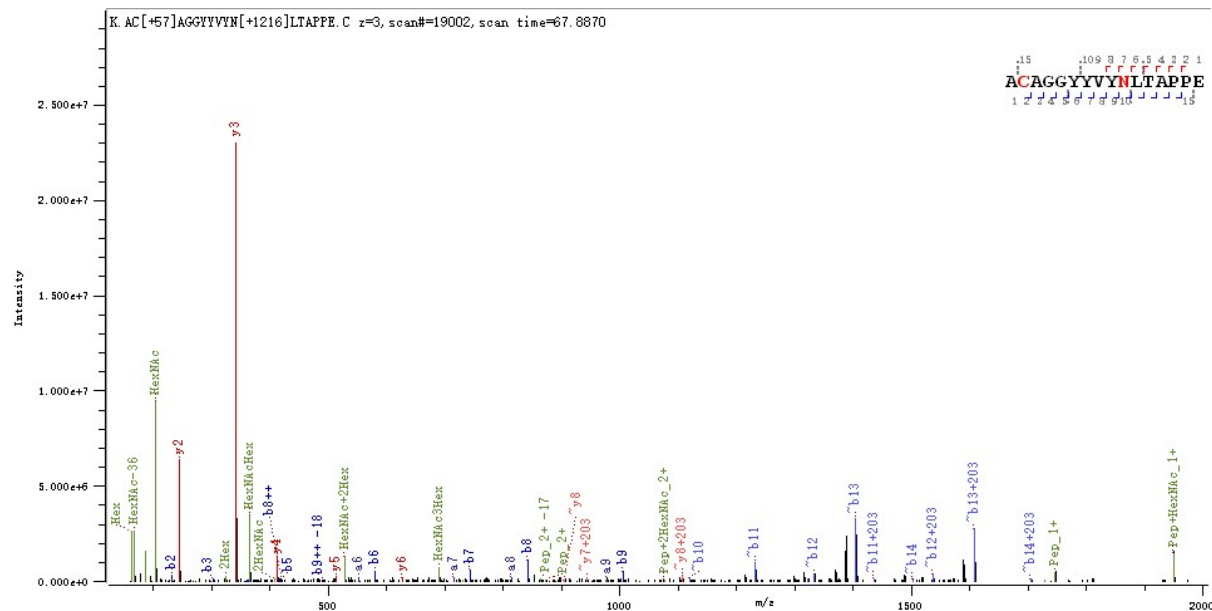

N-glycosite (N322).

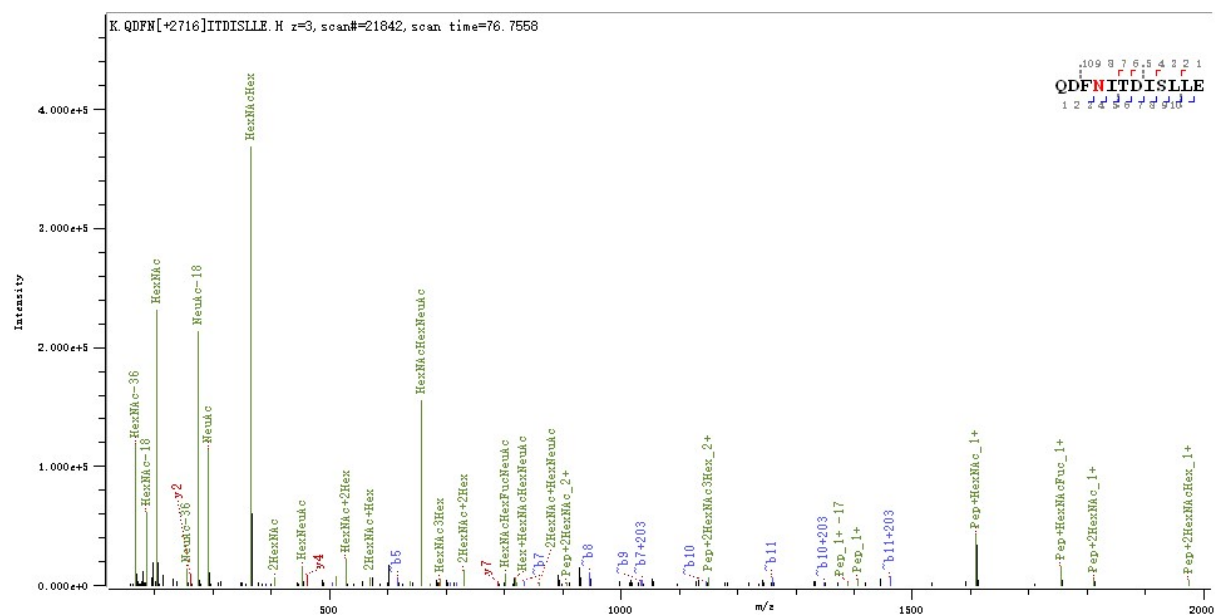

N-glycosite (N396).

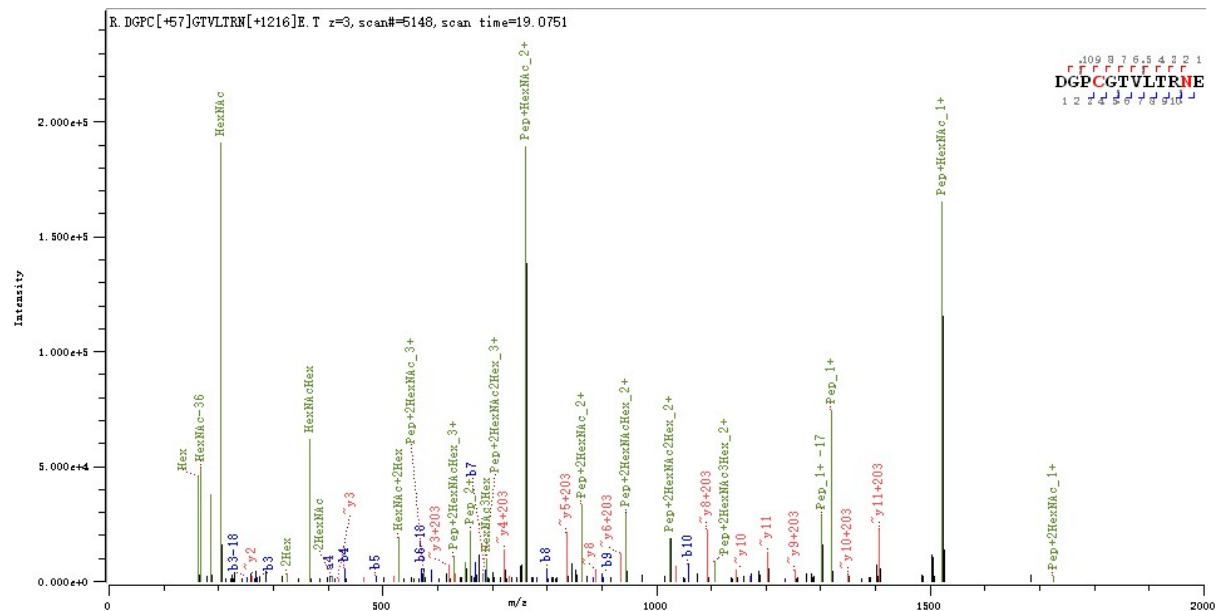

R\_FALMTN[+57]YATPSSN[+1216]ATDPLK.Y z=3, scan#=#20734, scan time=73.0249

Intensity

m/z

HexHexNaC-36  
HexNaC  
b2  
y2  
2Hex\_b3  
y3  
HexNaC  
2HexNaC  
b4  
y4  
y5  
HexNaC+2Hex  
b5  
2HexNaC+Hex  
b6  
HexNaC3Hex  
b7-18  
y7  
b7  
y8  
Pep-HexNaC\_3+  
Pep+2HexNaC\_3+  
b8  
y7+203  
y10  
y8+203  
y14  
b9-18  
b9Pep\_2+  
b10  
Pep\_2+ -17  
y12  
y10+203  
Pep-HexNaC\_2+  
b11  
y11+203  
y12+203  
Pep+2HexNaC\_2+  
y13+203  
Pep+2HexNaC2Hex\_2+  
y14  
y13+203  
b14  
y15  
y14+203  
y16  
y15+203  
b17  
y17  
y16+203  
b16+203

FALLMTN[+57]YATPSSN[+1216]ATDPLK

**A**

MW (kDa)

180-  
130-  
100-  
70-

Marker IgAN-R1 IgAN-R2 IgAN-R3 IgAN-R4 IgAN-R5 HC-R1 HC-R2 HC-R3 HC-R4 HC-R5

**B**

Marker IgAN-R1 IgAN-R2 IgAN-R3 IgAN-R4 IgAN-R5 HC-R1 HC-R2 HC-R3 HC-R4 HC-R5

Umod-
